# Supplementary material for: Impact evaluations of drug decriminalisation and legal regulation on drug use, health and social harms: a systematic review
Source: PubMed Central journal article supplement — BMJ Open. 2020 Sep 21;10(9):e035148. doi: 10.1136/bmjopen-2019-035148 (PMC7507857; doi:10.1136/bmjopen-2019-035148), 2020-09-21
Supplement: bmjopen-2019-035148.draft_revisions.pdf [file bmjopen-2019-035148.draft_revisions.pdf]

# BMJ Open

BMJ Open is committed to open peer review. As part of this commitment we make the peer review history of every article we publish publicly available.

When an article is published we post the peer reviewers' comments and the authors' responses online. We also post the versions of the paper that were used during peer review. These are the versions that the peer review comments apply to.

The versions of the paper that follow are the versions that were submitted during the peer review process. They are not the versions of record or the final published versions. They should not be cited or distributed as the published version of this manuscript.

BMJ Open is an open access journal and the full, final, typeset and author-corrected version of record of the manuscript is available on our site with no access controls, subscription charges or pay-per-view fees (<http://bmjopen.bmj.com>).

If you have any questions on BMJ Open's open peer review process please email [info.bmjopen@bmj.com](mailto:info.bmjopen@bmj.com)

# BMJ Open

## Impact evaluations of drug decriminalization and legal regulation: A systematic review

|                               |                                                                                                                                                                                                                                                                                                                                                                                                                                                                                                                                                                                 |
|-------------------------------|---------------------------------------------------------------------------------------------------------------------------------------------------------------------------------------------------------------------------------------------------------------------------------------------------------------------------------------------------------------------------------------------------------------------------------------------------------------------------------------------------------------------------------------------------------------------------------|
| Journal:                      | <i>BMJ Open</i>                                                                                                                                                                                                                                                                                                                                                                                                                                                                                                                                                                 |
| Manuscript ID                 | bmjopen-2019-035148                                                                                                                                                                                                                                                                                                                                                                                                                                                                                                                                                             |
| Article Type:                 | Original research                                                                                                                                                                                                                                                                                                                                                                                                                                                                                                                                                               |
| Date Submitted by the Author: | 20-Oct-2019                                                                                                                                                                                                                                                                                                                                                                                                                                                                                                                                                                     |
| Complete List of Authors:     | Scheim, Ayden; Drexel University, Epidemiology and Biostatistics; St Michael's Hospital, Centre on Drug Policy Evaluation<br>Maghsoudi, Nazlee; St Michael's Hospital, Centre on Drug Policy Evaluation; University of Toronto, Institute of Health Policy, Management and Evaluation<br>Marshall, Zack; McGill University, Social Work<br>Churchill, Siobhan; Western University, Epidemiology and Biostatistics<br>Ziegler, Carolyn; Unity Health Toronto<br>Werb, Dan; University of California San Diego, Medicine; St Michael's Hospital, Centre on Drug Policy Evaluation |
| Keywords:                     | Substance misuse < PSYCHIATRY, PUBLIC HEALTH, LAW (see Medical Law)                                                                                                                                                                                                                                                                                                                                                                                                                                                                                                             |
|                               |                                                                                                                                                                                                                                                                                                                                                                                                                                                                                                                                                                                 |

SCHOLARONE™  
Manuscripts

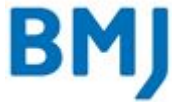

I, the Submitting Author has the right to grant and does grant on behalf of all authors of the Work (as defined in the below author licence), an exclusive licence and/or a non-exclusive licence for contributions from authors who are: i) UK Crown employees; ii) where BMJ has agreed a CC-BY licence shall apply, and/or iii) in accordance with the terms applicable for US Federal Government officers or employees acting as part of their official duties; on a worldwide, perpetual, irrevocable, royalty-free basis to BMJ Publishing Group Ltd ("BMJ") its licensees and where the relevant Journal is co-owned by BMJ to the co-owners of the Journal, to publish the Work in this journal and any other BMJ products and to exploit all rights, as set out in our [licence](#).

The Submitting Author accepts and understands that any supply made under these terms is made by BMJ to the Submitting Author unless you are acting as an employee on behalf of your employer or a postgraduate student of an affiliated institution which is paying any applicable article publishing charge ("APC") for Open Access articles. Where the Submitting Author wishes to make the Work available on an Open Access basis (and intends to pay the relevant APC), the terms of reuse of such Open Access shall be governed by a Creative Commons licence – details of these licences and which [Creative Commons](#) licence will apply to this Work are set out in our licence referred to above.

Other than as permitted in any relevant BMJ Author's Self Archiving Policies, I confirm this Work has not been accepted for publication elsewhere, is not being considered for publication elsewhere and does not duplicate material already published. I confirm all authors consent to publication of this Work and authorise the granting of this licence.

## Impact evaluations of drug decriminalization and legal regulation: A systematic review

Ayden I. Scheim,<sup>1,2,3</sup> Nazlee Maghsoudi,<sup>1,4</sup> Zack Marshall,<sup>5</sup> Siobhan Churchhill,<sup>6</sup> Carolyn Ziegler,<sup>7</sup> Dan Werb<sup>1,2,4</sup>

1. Centre on Drug Policy Evaluation, Li Ka Shing Knowledge Institute, St. Michael's Hospital, Toronto, ON, Canada

2. Department of Medicine, University of California San Diego, La Jolla, CA

3. Department of Epidemiology, Dornsife School of Public Health, Philadelphia, PA

4. Institute of Health Policy, Management and Evaluation, University of Toronto, Toronto, ON, Canada

5. Department of Social Work, McGill University, Montreal, QC, Canada

6. Department of Epidemiology and Biostatistics, Western University, London, ON, Canada

7. Health Sciences Library, St. Michael's Hospital, Toronto, ON, Canada

### Corresponding Author:

Dan Werb  
St. Michael's Hospital  
30 Bond Street  
Toronto, ON, Canada  
M5B 1X1

Email: [dwerb@ucsd.edu](mailto:dwerb@ucsd.edu)

Phone: 858-205-8262

**Word Count:** 3561

## ABSTRACT

**Objectives:** To review studies evaluating effects of drug decriminalization or legal regulation on drug availability, use, or related health and social harms globally.

**Design:** Systematic review with narrative synthesis.

**Data sources:** We searched MEDLINE, Embase, PsycINFO, Web of Science, and six additional databases for publications from 1 January 1970 through 4 October 2018.

**Inclusion criteria:** Peer-reviewed articles or published abstracts in any language with quantitative data on drug availability, use, or related health and social harms collected before and after implementation of *de jure* drug decriminalization or legal regulation. We excluded studies evaluating *de facto* decriminalization.

**Data extraction and synthesis:** Two independent reviewers screened titles, abstracts, and articles for inclusion. Extraction and quality appraisal (modified Downs and Black checklist) were performed by one reviewer and checked by a second, with discrepancies resolved by a third. We coded study-level outcome measures into metric groupings and categorized the estimated direction of association between the legal change and outcomes of interest.

**Results:** We screened 4860 titles and 221 full texts and included 114 articles. Most (n=104, 91.2%) were from the U.S., evaluated cannabis reform (n=109, 95.6%), and focused on legal regulation (n=96, 84.2%). 223 study outcome measures were categorized into 32 metrics, most commonly prevalence (39.5% of studies), frequency (14.0%), or perceived harmfulness (10.5%) of use of the decriminalized or regulated drug; or use of tobacco, alcohol, or other drugs (12.3%). Across all three substance use metrics, legal reform was most often statistically unassociated with use.

**Conclusions:** Studies evaluating drug decriminalization and legal regulation are concentrated in the U.S. and on cannabis legalization. Despite the range of outcomes potentially impacted by drug law reform, extant research is narrowly focused, with a particular emphasis on the prevalence of use. Metrics in drug law reform evaluations require improved alignment with relevant health and social outcomes.

### Strengths and limitations of this study

- This is the first study to review all literature on the health and social impacts of decriminalization or legal regulation of drugs.
- We systematically searched 10 databases over a 38-year period, without language restrictions.
- The review was limited to study designs appropriate for evaluating interventions, nevertheless, most included studies used relatively weak evaluation designs.
- Given the study aim of characterizing metrics used in impact evaluations to date, included outcomes were heterogeneous and not quantitatively synthesized.
- Heterogeneity in the content and implementation of decriminalization and legal regulation policies was not considered in this review.

## INTRODUCTION

An estimated 271 million people used an internationally scheduled (“illicit”) drug in 2017, corresponding to 5.5% of the global population aged 15-64.[1] Despite decades of investment, policies aimed at reducing supply and demand have demonstrated limited effectiveness.[2,3] Moreover, prohibitive and punitive drug policies have had counterproductive effects by contributing to HIV and hepatitis C transmission,[4,5] fatal overdose,[6] mass incarceration and other human rights violations,[7,8] and drug market violence.[9] As a result, there have been growing calls for drug law reform [10–12] and in 2019, the United Nations Chief Executives Board endorsed decriminalization of drug use and possession.[13] Against this backdrop, as of 2017 approximately 23 countries had implemented *de jure* decriminalization or legal regulation of one or more previously illegal drugs.[14–16]

A wide range of health and social outcomes are affected by psychoactive drug production, sales, and use, and thus are potentially impacted by drug law reform. Nutt and colleagues have categorized these as physical harms (e.g., drug-related morbidity and mortality to users, injury to non-users), psychological harms (e.g., dependence), and social harms (e.g., loss of tangibles, environmental damage).[17,18] 2Concomitantly, a diverse and sometimes competing set of goals motivate drug policy development, including ameliorating the poor health and social marginalization experienced by people who use drugs problematically, shifting patterns of use to less harmful products or modes of administration, curtailing illegal markets and drug-related crime, and reducing the economic burden of drug-related harms.[19]

Given ongoing interest by states in drug law reform, a comprehensive understanding of their impacts to date is required. However, the scientific literature has not been well-characterized, and thus the state of the evidence related to these heterogenous policy targets remains largely unclear. While two meta-analyses have been published, both are narrowly focused on adolescent cannabis use. Sarvet et al. found that the implementation of medical cannabis policies in the United States (U.S.) did not lead to increases in the prevalence of past-month cannabis use among adolescents [20] and Melchior et al. found a small increase in use following recreational legalization that was reported only among lower-quality studies.[21]

1  
2  
3  
4  
5 Given increasing interest in drug law reform, as well as a lack of systematic assessment of  
6 outcomes beyond adolescent cannabis use to date, we conducted a systematic review of the  
7 effects of drug decriminalization or legal regulation on drug availability, use, or related health  
8 and social harms. We specifically aimed to characterize the topical and geographic range of  
9 existing studies, summarize the impacts of decriminalization and legal regulation, and identify  
10 gaps in the evidence.  
11  
12  
13  
14

## 15 16 **METHODS**

17  
18  
19 Consistent with our aim of synthesizing evidence on the impacts of decriminalization and  
20 legal regulation across the spectrum of potential health and social effects, we conducted a  
21 systematic review using narrative synthesis [22] without meta-analysis, following Preferred  
22 Reporting Items for Systematic Reviews and Meta-Analyses (PRISMA) guidelines.[23] The  
23 review protocol was registered in PROSPERO (CRD42017079681) and can be found online  
24 at [https://www.crd.york.ac.uk/prospero/display\\_record.php?RecordID=79681](https://www.crd.york.ac.uk/prospero/display_record.php?RecordID=79681).  
25  
26  
27  
28

### 29 30 **Search Strategy and Selection Criteria**

31  
32  
33 The review team developed, piloted, and refined the search strategy in consultation with a  
34 research librarian and content experts. We searched MEDLINE, Embase, PsycINFO, Web of  
35 Science, Criminal Justice Abstracts, Applied Social Sciences Index & Abstracts, International  
36 Bibliography of the Social Sciences, PAIS Index, Policy File Index, and Sociological Abstracts  
37 for publications from 1 January 1970 through 4 October 2018. We used MeSH terms and  
38 keywords related to (a) scheduled psychoactive drugs (b) legal regulation or decriminalization  
39 policies, and (c) quantitative study designs. See Appendix A for the final MEDLINE search  
40 strategy. For conference abstracts, we contacted authors for additional information on study  
41 methods and to identify subsequent relevant publications.  
42  
43  
44  
45  
46  
47  
48

49  
50 We included peer-reviewed journal articles or conference abstracts reporting on original  
51 quantitative studies that collected data both before and after the implementation of drug  
52 decriminalization or legal regulation. We defined decriminalization as the removal of criminal  
53 penalties for drug use and/or possession (allowing for civil or administrative sanctions) and legal  
54  
55  
56  
57  
58  
59  
60



1  
2  
3 regulation as the development of a legal regulatory framework for the use, production, and sale  
4 of psychoactive drugs. Studies were excluded if they evaluated *de facto* (e.g., changes in  
5 enforcement practices) rather than *de jure* decriminalization or legal regulation (changes to the  
6 law). This exclusion applied to studies analyzing changes in outcomes following the U.S. Justice  
7 Department 2009 memo deprioritizing prosecution of cannabis-related offences legal under state  
8 medical cannabis laws. Eligible studies included outcome measures pertaining to drug  
9 availability, use, or related health and social harms, following the schema developed by Nutt and  
10 colleagues.[18]  
11  
12  
13  
14  
15  
16  
17

18 Both observational studies and randomized controlled trials were eligible in principle, but no  
19 trials were identified. There were no geographic or language restrictions; titles, abstracts, and  
20 full-texts were translated on an as-needed basis for screening and data extraction. We excluded  
21 cross-sectional studies (unless they were repeated) and studies lacking pre- and post-  
22 implementation data collection because such designs are inappropriate for evaluating  
23 intervention effects.  
24  
25  
26  
27  
28

### 29 **Data Analysis**

30  
31  
32 Screening and data extraction were conducted in DistillerSR (Evidence Partners, Ottawa,  
33 Ontario). We began with title-only screening to identify potentially relevant titles. Two reviewers  
34 screened each title. Unless both reviewers independently decided a title should be excluded, it  
35 was advanced to the next stage. Next, two reviewers independently screened each potentially  
36 eligible abstract. Inter-rater reliability was good (weighted Kappa at the question level=0.75). At  
37 this stage, we retrieved full-text copies of all remaining references, which were screened  
38 independently by two reviewers. Disagreements on inclusion were resolved through discussion  
39 with the first author. Finally, one reviewer extracted data from each included publication using a  
40 standardized, pre-piloted form and performed quality appraisal. A second reviewer double-  
41 checked data extraction and quality appraisal for every publication, and the first author resolved  
42 any discrepancies.  
43  
44  
45  
46  
47  
48  
49  
50  
51

52 The data extraction form included information on study characteristics (author, title, year,  
53 geographic location), type of legal change studied and drug(s) impacted, details and timing of the  
54 legal change (e.g., medical vs. recreational cannabis regulation), study design, sampling  
55  
56  
57  
58  
59  
60

1  
2  
3 approach, sample characteristics (size, age range, proportion female), and quantitative estimates  
4 of association. We coded study-level outcome measures into metric groupings, using 24 pre-  
5 specified categories and a free-text field (see Figure 3 for full list). Examples of metrics include:  
6 prevalence of use of the decriminalized or regulated drug, overdose or poisoning, and non-drug  
7 crime.  
8  
9

10  
11  
12 We also categorized the estimated direction of association of the legal change on outcome  
13 measure(s) of interest (beneficial, harmful, mixed, or null).<sup>2</sup> These associations were coded at  
14 the outcome (not study) level and classified as beneficial if a statistically significant increase in a  
15 positive outcome (e.g., educational attainment) or decrease in a negative outcome (e.g.,  
16 substance use disorder) was attributed to implementation of decriminalization or legal regulation,  
17 and vice-versa for harmful associations. The association was categorized as mixed if associations  
18 were both harmful and beneficial across participant subgroups, exposure definitions (e.g., loosely  
19 vs. tightly regulated medical cannabis access), or timeframes. The association was categorized as  
20 null if no statistically significant changes following implementation of drug decriminalization or  
21 legal regulation were detected. We set statistical significance at  $\alpha=0.05$ , including in cases where  
22 authors used more liberal criteria.  
23  
24  
25  
26  
27  
28  
29  
30  
31

32  
33 Quality assessment at the study level was conducted for each full-length article using a modified  
34 version of the Downs and Black checklist [24] for observational studies (see Appendix B). Each  
35 study could receive up to 18 points, with higher scores indicating more methodologically  
36 rigorous studies. Conference abstracts were not subjected to quality assessment due to limited  
37 methodologic details.  
38  
39  
40

## 41 42 **Patient and Public Involvement**

43  
44  
45 This systematic review of existing studies did not include patient or public involvement.  
46

## 47 48 **RESULTS**

### 49 50 **Study Characteristics**

51  
52  
53  
54 As shown in the PRISMA Flow Diagram (Figure 1), we screened 4860 titles and abstracts and  
55 213 full texts, with 114 articles meeting inclusion criteria (Appendix C). Key reasons for  
56  
57  
58  
59

**Table 1. Characteristics of studies evaluating drug decriminalization or legal regulation, 1970-2018**

| <b>Characteristic</b>           | <b>Total (%)<br/>n (%)<br/>(n = 114)</b> | <b>Decriminalization<sup>a</sup><br/>n (%)<br/>(n =19)</b> | <b>Legal regulation<sup>a</sup><br/>n (%)<br/>(n =96)</b> |
|---------------------------------|------------------------------------------|------------------------------------------------------------|-----------------------------------------------------------|
| <b>Country</b>                  |                                          |                                                            |                                                           |
| United States                   | 104 (91.2)                               | 10 (52.6)                                                  | 95 (99.0)                                                 |
| Australia                       | 3 (2.6)                                  | 3 (15.8)                                                   | 0 (0.0)                                                   |
| Portugal                        | 2 (1.8)                                  | 2 (10.5)                                                   | 0 (0.0)                                                   |
| China                           | 1 (0.9)                                  | 0 (0.0)                                                    | 1 (1.0)                                                   |
| Czech Republic                  | 1 (0.9)                                  | 1 (5.3)                                                    | 0 (0.0)                                                   |
| Mexico                          | 1 (0.9)                                  | 1 (5.3)                                                    | 0 (0.0)                                                   |
| Multi-country <sup>b</sup>      | 2 (1.8)                                  | 2 (10.5)                                                   | 0 (0.0)                                                   |
| <b>Focus of drug law reform</b> |                                          |                                                            |                                                           |
| Cannabis                        | 109 (95.6)                               | 15 (78.9)                                                  | 95 (99.0)                                                 |
| Opium                           | 1 (0.9)                                  | 0 (0.0)                                                    | 1 (1.0)                                                   |
| Peyote                          | 1 (0.9)                                  | 1 (5.3)                                                    | 0 (0.0)                                                   |
| Multiple/All drugs              | 3 (2.6)                                  | 3 (15.8)                                                   | 0 (0.0)                                                   |

exclusion at the full-text screening stage were that the article did not report on original quantitative research (n=59) or did not evaluate decriminalization or legal regulation as defined herein (n=23). Details of each included study are presented in Supplementary Table 1. Included studies had final publication dates from 1976-2019; 44.7% (n=51) were first published in 2017-2018, 43.9% (n=50) were published in 2014-2016 and 11.4% (n=13) were published before 2014.

Characteristics of included studies are described in Table 1, both overall and stratified by whether they evaluated decriminalization (n=19) or legalization (n=96) policies (one study evaluated both policies). Most studies (n=104, 91.2%) were from the U.S. and examined impacts of liberalizing cannabis laws (n=109, 95.6%). Countries represented in non-U.S. studies included Australia, Belgium, China, Czech Republic, France, Mexico, and Portugal. The most common study designs were repeated cross-sectional (n=74, 64.9%) or controlled before-and-after (n=26, 22.8%) studies and the majority of studies (n=87, 76.3%) used population-based sampling methods. Figure 2 illustrates the geographic distribution of studies among countries where national or subnational governments had decriminalized or legally regulated one or more drugs

**Study design**

|                               |           |           |           |
|-------------------------------|-----------|-----------|-----------|
| Cohort                        | 4 (3.5)   | 0 (0.0)   | 4 (4.2)   |
| Controlled before-and-after   | 26 (22.8) | 6 (31.6)  | 20 (20.8) |
| Interrupted time series       | 6 (5.3)   | 0 (0.0)   | 6 (6.3)   |
| Repeated cross-sectional      | 74 (64.9) | 11 (57.9) | 64 (66.7) |
| Uncontrolled before-and-after | 4 (3.5)   | 2 (10.5)  | 2 (2.1)   |

**Sampling approach**

|                        |           |           |           |
|------------------------|-----------|-----------|-----------|
| Convenience            | 22 (19.3) | 5 (26.3)  | 18 (18.8) |
| Population-based       | 87 (76.3) | 13 (68.4) | 74 (77.1) |
| Administrative records | 45 (39.5) | 6 (31.6)  | 39 (40.6) |
| Household survey       | 25 (21.9) | 5 (26.3)  | 20 (20.8) |
| School-based survey    | 17 (14.9) | 2 (10.5)  | 15 (15.6) |
| Unspecified            | 5 (4.2)   | 1 (5.3)   | 4 (4.2)   |

a. Combined total exceeds number of studies because some evaluated both decriminalization and legal regulation.

b. One global study and one from Belgium, Portugal, and France

**Study Quality**

Quality assessment was performed for the 93 full-length articles included in the review, excluding 21 conference abstracts (Supplementary Table 1). Scores ranged from 7 to 18 of 18 possible points, with a mean of 14.4 (SD=2.56). Quality scores were similar comparing U.S. to non-U.S.-based studies ( $X=14.4$  and  $13.7$ , respectively,  $p=0.386$ ) but higher for studies evaluating legal regulation ( $X=14.8$ ) versus decriminalization ( $X=12.8$ ) ( $p=0.003$ ). Study quality did not appear to increase over time (e.g.,  $X=14.0$  in 2014 and  $14.4$  in 2018).

**Study Outcome Measures and Metrics**

Across 114 studies we extracted 223 outcome measures, which were coded into 32 metrics (Figure 3). The most common metric employed by studies was the prevalence of use of the decriminalized or legally regulated drug, which was examined in 39.5% of studies ( $n=45$ ) and represented 22.4% of outcome measures ( $n=50$ ). Of these studies, 14 (31.1%; 8 full-length articles and 6 abstracts) did not report any other metric [25–38] and an additional 5 articles

1  
2  
3 (11.1%) reported on the prevalence of use in addition to a single drug-related perception metric  
4 (either harmfulness or availability).[39–43] The second most common metric was the frequency  
5 of use of the decriminalized or legally regulated drug (14.0% of studies, n=16) and the third was  
6 the prevalence or frequency of use of tobacco, alcohol, or drugs that remained illegal (12.3% of  
7 studies, n=14; 9.4% of outcome measures, n=21). The fourth most commonly employed metric  
8 was any change in the perceived harmfulness of the decriminalized or regulated drug (10.5% of  
9 studies, n=12), which was assessed among adolescents or young adults in all studies except for  
10 one that assessed this metric among parents.[44]  
11  
12  
13  
14  
15  
16  
17

18 All other metrics were assessed in <10% of included studies. Health service utilization was  
19 evaluated in 7.9% of studies (n=9) using 12 outcome measures, primarily related to emergency  
20 department visits and/or hospitalizations. Prescribed (primarily opioid) drug use and perceived  
21 availability of the decriminalized or legally regulated drug were reported in 7.0% of studies each  
22 (n=8). Overdose or poisoning by the decriminalized or regulated drug, and by other drugs  
23 (predominantly opioids), were examined in 5.3% (n=6) and 6.1% of studies (n=7), respectively.  
24 Driving while under the influence of the decriminalized or regulated drug (cannabis) was  
25 examined in seven studies (6.1%) inclusive of eight outcome measures. Notably, some studies  
26 assessed the proportion of fatally injured drivers screening cannabis-positive, versus the overall  
27 prevalence of impaired driving. Remaining metrics were measured in less than 5% of studies  
28 (Figure 3). Some pre-specified metrics were not represented in any of the articles, including  
29 infectious disease incidence (e.g., HIV, Hepatitis C), environmental impacts (e.g., drug  
30 production waste, discarded needles), and labor market participation.  
31  
32  
33  
34  
35  
36  
37  
38  
39  
40  
41  
42

43 Of the ten studies conducted outside the U.S., six focused on cannabis decriminalization. All  
44 three studies from Australia examined the prevalence of cannabis use post-  
45 decriminalization,[30,33,45] while one also measured perceived cannabis availability.[45]  
46 Following cannabis decriminalization, one European multi-country study (Belgium, Portugal,  
47 France) examined the prevalence of cannabis use and uptake of cannabis-related addictions  
48 treatment [46] and one Czech study considered the age of first cannabis use.[47] An international  
49 study using United Nations Office on Drugs and Crime data from 102 countries compared  
50 availability, as reflected by cannabis seizures and plant eradication, in countries that had  
51  
52  
53  
54  
55  
56  
57  
58  
59  
60

1  
2  
3 decriminalized cannabis versus those that had not.[48] Three non-U.S. studies evaluated  
4 decriminalization of all psychoactive drugs. Two studies from Portugal examined health care and  
5 non-health-care costs and psychoactive drug prices, respectively.[49,50] One study from Mexico  
6 examined drug-related criminal justice involvement (arrests) and (violent) crimes.[51] Finally, a  
7 study of historic opium legalization in China (1801-1902) measured the price and availability  
8 (quantity of exports) of opium before and after legalization.[52]  
9  
10  
11  
12  
13

### 14 15 **Impacts of Decriminalization and Legal Regulation** 16

17  
18  
19 Supplementary Table 2 tallies findings for each of the metrics; here we focus on those examined  
20 in more than 5% of studies. Across all three substance use metrics (prevalence of use, frequency  
21 of use, and use of other alcohol or drugs), drug law reform was most often statistically  
22 unassociated with use (with null findings for 48.0-52.4% of outcome measures falling under  
23 these metrics). With respect to change in perceived harmfulness of the decriminalized or  
24 regulated drug, mixed results were found in half of cases, with heterogeneity detected on the  
25 basis of age, gender, and state.[39,43,53–55] For example, legal regulation of cannabis for  
26 medical use was associated with greater perceived harmfulness of cannabis among eighth graders  
27 but not older students in an analysis of U.S. Monitoring the Future data [39] while a study  
28 employing U.S. National Survey on Drug Use and Health data found greater perceived  
29 harmfulness of cannabis among young adults aged 18-25 but not adolescents aged 12-17.[55]  
30  
31  
32  
33  
34  
35  
36  
37  
38

39  
40 Among nine studies that employed health service utilization metrics, harmful effects were  
41 reported for six of nine outcome measures, with increases in emergency department visits and/or  
42 hospitalizations attributed to decriminalization or legal regulation.[56–61] However, all but one  
43 of those studies [58] assessed change over time in one jurisdiction, without a control group. In  
44 contrast, six of nine prescription drug use associations were beneficial, with reductions observed  
45 in rates of opioid [62–66] and other drug prescribing [67,68] attributed to legal regulation of  
46 cannabis for medical use. Perceived availability of the decriminalized or regulated drug appeared  
47 largely unaffected by decriminalization (null associations for five of eight outcome measures)  
48 but one study indicated increased perceived availability of cannabis among Colorado, U.S.  
49 adolescents following legal regulation for adult use.[69] Across the subset of seven outcome  
50  
51  
52  
53  
54  
55  
56  
57  
58  
59  
60

1  
2  
3 measures for overdose or poisoning by the decriminalized or regulated drug (cannabis), in all  
4 cases an increase in calls to poison control centers or unintentional pediatric exposures was  
5 reported.[57,70–74] However, studies assessing the impacts of cannabis regulation on overdose  
6 or poisoning by drugs other than cannabis concluded that the effects were either beneficial (four  
7 outcome measures[73,75–77]) or mixed/null (three outcome measures[78–80]). Driving while  
8 under the influence of cannabis was most often found to increase following decriminalization or  
9 legal regulation (five of eight outcome measures; [81–85]).

## 16 **DISCUSSION**

19 This systematic review identified 114 peer-reviewed publications and conference abstracts  
20 evaluating the impacts of drug decriminalization or legal regulation from 1970-2018. Within this  
21 search period, 88.6% were published in 2014 or later. This rapid growth in scholarship was  
22 driven by the implementation and subsequent evaluation of cannabis legalization in a number of  
23 U.S. states beginning in 2012, and knowledge production will surely continue to accelerate as  
24 longer-term data become available and as other jurisdictions (e.g., Canada, Uruguay) analyze the  
25 effects of recently implemented cannabis legalization. The present study provides an overview of  
26 the emerging literature based on our systematic review and suggests three key patterns.  
27  
28  
29  
30  
31  
32  
33

34 First, peer-reviewed evaluations of drug decriminalization and legal regulation are  
35 overwhelmingly geographically concentrated in the U.S. and focused on cannabis legalization. It  
36 is notable that decriminalization in the absence of legal regulation was evaluated in only 18  
37 studies (15.8%), despite being far more common globally than legal regulation. These gaps may  
38 hamper evidence-based drug law reform in countries that are less well-developed, play a  
39 substantial role in drug production and transit, or have different baseline levels of substance  
40 (mis)use as compared to the U.S.  
41  
42  
43  
44  
45  
46  
47

48 Second, prevalence of use was the predominant metric used to assess the impact of drug law  
49 reform, despite its limited clinical significance (e.g., much cannabis use is non-problematic) and  
50 limited responsiveness to drug policy. This is because ecological analyses have indicated little  
51 relationship between drug policies and prevalence of use,[2] as have studies assessing within-  
52 state change in use related to legal regulation;[20] these findings are further confirmed by the  
53  
54  
55  
56  
57  
58  
59  
60



1  
2  
3 preponderance of evidence synthesized in this review, which suggests that population prevalence  
4 of use is largely unaffected by drug policy. By contrast, drug policies may be able to influence  
5 the types of drugs that people use, drug-related risk behaviors, and modes of drug  
6 consumption.[86] Metrics to assess these outcomes, however, were lacking in the reviewed  
7 literature. For example, only one study (0.8%) investigated whether legal regulation of cannabis  
8 was associated with changes in the mode of cannabis consumption.[69] Although the prevalence  
9 of use was often measured alongside more clinically or socially significant metrics (e.g.,  
10 prevalence of substance use disorders, educational outcomes among young adults), 42.2% of  
11 studies assessing substance use prevalence included that metric alone or in combination with a  
12 single drug-related attitude metric.  
13  
14  
15  
16  
17  
18  
19  
20  
21

22 Third, there was a lack of alignment between the stated policy objectives of drug law reform and  
23 the metrics used to assess its impact in the scientific literature. For instance, removal of criminal  
24 sanctions to prevent their negative sequelae is a key rationale for decriminalization and legal  
25 regulation,[12,13,87] but only four studies (3.5%) evaluated changes in drug-related criminal  
26 justice involvement following drug law reform. As a result, there is a risk that decisions on drug  
27 policy may be informed by inappropriate metrics. Promisingly, in recent months, additional  
28 studies assessing legal regulation that employ a range of criminal justice metrics have been  
29 published.[88,89] Finally, despite ample evidence of the impact of criminalization on infectious  
30 disease transmission and acquisition risks,[5] we found no studies evaluating the impact of  
31 decriminalization on these outcomes.  
32  
33  
34  
35  
36  
37  
38  
39  
40

### 41 **Strengths and Limitations**

42  
43  
44 Both the included studies and our systematic review have important strengths and limitations.  
45 To our knowledge, we conducted the first review of all global literature on decriminalization and  
46 legal regulation and applied no language restrictions. All eligible articles identified were  
47 published in English; this may reflect a paucity of evaluation research published in other  
48 languages and/or limitations of our search strategy. In addition, we excluded grey literature and  
49 study designs that are not suited to evaluating policy effects (e.g., cross-sectional studies), but  
50 these restrictions may have narrowed the geographic scope of included studies. Nevertheless,  
51  
52  
53  
54  
55  
56  
57  
58  
59  
60



1  
2  
3 most included studies used weaker eligible study designs that are vulnerable to pre-existing  
4 trends and confounding; only 22.8% and 5.3% respectively used controlled before-and-after or  
5 interrupted time series designs to address these threats to validity.  
6  
7

8  
9  
10 This narrative synthesis did not focus on estimating the outcome-specific effects of particular  
11 decriminalization or legal regulation policies but instead sought to characterize the metrics  
12 employed to date. With respect to both the individual studies and our synthesis, the  
13 implementation and specific provisions of drug policies vary widely. Decriminalization policies  
14 vary in their definitions of quantities for personal use, application of administrative penalties,  
15 and the extent to which the law “on the books” is reflected in policing and criminal justice  
16 practice. Indeed, in some jurisdictions with nominal decriminalization, arrests for possession of  
17 small quantities of the decriminalized drugs remain routine.[51] Legal regulation models for  
18 cannabis are also heterogenous. For example, policies legally regulating cannabis for medical use  
19 may or may not allow for legal dispensaries, and this provision has been shown to substantially  
20 modify the impact of legal regulation on cannabis use.[90] To the extent that individual studies  
21 employed crude exposure measures (e.g., presence versus absence of a law), they may have  
22 obscured context-dependent effects of drug law liberalization.  
23  
24  
25  
26  
27  
28  
29  
30  
31  
32  
33

34 Our use of vote-counting in this synthesis (i.e., categorizing individual outcome measures as  
35 indicating beneficial, harmful, mixed/subgroup-specific, or no statistically significant  
36 associations) is subject to the same limitation. Vote-counting should also be interpreted with  
37 caution in light of the heterogeneity of outcome definitions and the inherent arbitrariness of  
38 statistical significance thresholds. Moreover, as illustrated by a recently published extension of  
39 the included article by Bachhuber et al.,[76] multiple high-quality studies may generate results  
40 that are later revealed to be spurious as additional follow-up data become availability.  
41 Specifically, Shover et al. demonstrated that the positive association reported between medical  
42 cannabis legalization and opioid overdose mortality in 1999-2010 reversed direction in later  
43 years, suggesting that earlier findings of a protective effect should not be given causal  
44 interpretations.[91]  
45  
46  
47  
48  
49  
50  
51  
52  
53  
54

## 55 **Conclusions**

56  
57  
58  
59  
60

1  
2  
3  
4  
5 The findings of this review indicate a need for a broadening of the metrics used to assess the  
6 impacts of drug decriminalization and legal regulation. Given the growing number of  
7 jurisdictions considering decriminalization or legal regulation of psychoactive drugs,[14–16] the  
8 disproportionate emphasis on metrics assessing drug use prevalence, as well as the limited geo-  
9 cultural diversity in evaluations, are concerning. Experts have called for a more fulsome  
10 approach to evaluating drug policies in line with public health and the United Nations  
11 Sustainable Development Goals, with attention to the full breath of health and social domains  
12 potentially impacted, including human rights and social inclusion (e.g., stigma), peace and  
13 security (e.g., drug market violence), development (e.g., labor market participation) drug market  
14 regulation (e.g., safety of the drug supply), and clinically-significant health metrics (e.g., drug-  
15 related morbidity).[92] Drawing on methods such as multi-criterion decision analysis,[19] the  
16 engagement of both scientists and policymakers in priority-setting may help to produce evidence  
17 that provides a more comprehensive understanding of the breadth of impacts that should be  
18 anticipated with drug law reform efforts.

### 29 **Figure 1 Legend**

30 PRISMA Flow Diagram  
31  
32  
33

### 34 **Figure 2 Legend**

35  
36 Number of included studies from countries that implemented decriminalization or legal  
37 regulation by 2017  
38

39 **Note:** Policy changes were classified, following the review inclusion criteria, based on the implementation of a  
40 change to national or subnational law to decriminalize drug use and/or possession or to legalize at least one class of  
41 drugs. We did not evaluate the extent to which legal changes were reflected in policing and criminal justice practice.  
42 Implementation of cannabis legalization for medical purposes only is not reflected in this map.  
43  
44

### 45 **Figure 3 Legend**

46 Metrics examined by included studies.  
47  
48  
49

### 50 **Author contributions**

51 DW and AIS conceptualized and supervised the review. CZ designed and conducted the  
52 literature searches. AIS drafted the manuscript. SC, ZM, and AIS conducted screening and data  
53 extraction. NZ contributed to drafting the manuscript and developing figures. All authors  
54  
55  
56  
57  
58  
59

1  
2  
3 contributed to interpretation of findings and revising the manuscript for important intellectual  
4 content.  
5

### 6 **Acknowledgements**

7  
8 The authors would like to thank Gelareh Ghaderi for assistance with screening and data  
9 extraction.  
10

### 11 **Funding**

12  
13 This review was supported by the Canadian Institutes of Health Research (CIHR) via the  
14 Canadian Research Initiative on Substance Misuse (SMN-139150), the MAC AIDS Foundation,  
15 and the Open Society Foundations. Ayden Scheim was supported by a Canadian Institutes of  
16 Health Research Postdoctoral Fellowship. Dan Werb is supported by a U.S. National Institute on  
17 Drug Abuse Avenir Award (DP2- DA040256), a CIHR New Investigator Award, an Early  
18 Researcher Award from the Ontario Ministry of Research, Innovation and Science, and the St.  
19 Michael's Hospital Foundation.  
20  
21  
22  
23  
24

### 25 **Competing interests**

26 We have no competing interests to declare.  
27  
28

### 29 **Data sharing statement**

30 All relevant data are contained within the article and supplementary materials.  
31  
32  
33

## 34 **REFERENCES**

- 35  
36  
37 1. United Nations Office on Drugs and Crime (UNODC). World Drug Report 2019.  
38 <https://wdr.unodc.org/wdr2019/index.html>. United Nations publication, Sales No. E.19.XI.9.  
39 Published June 2019. Accessed August 28, 2019.  
40  
41 2. Degenhardt L, Chiu W-T, Sampson N, et al. Toward a global view of alcohol, tobacco,  
42 cannabis, and cocaine use: findings from the WHO World Mental Health Surveys. *PLoS*  
43 *Med* 2008;5(7):e141. doi:10.1371/journal.pmed.0050141  
44  
45 3. Werb D, Kerr T, Nosyk B, et al. The temporal relationship between drug supply indicators:  
46 an audit of international government surveillance systems. *BMJ Open* 2013;3(9):e003077.  
47 doi:10.1136/bmjopen-2013-003077  
48  
49 4. Mathers BM, Degenhardt L, Phillips B, et al. Global epidemiology of injecting drug use and  
50 HIV among people who inject drugs: a systematic review. *Lancet* 2008;372(9651):1733–  
51 1745. doi:10.1016/S0140-6736(08)61311-2  
52  
53  
54  
55  
56  
57  
58  
59  
60

- 1  
2  
3 5. DeBeck K, Cheng T, Montaner JS, et al. HIV and the criminalisation of drug use among  
4 people who inject drugs: a systematic review. *Lancet HIV* 2017;4(8):e357-374 .  
5 doi:10.1016/S2352-3018(17)30073-5  
6
- 7  
8 6. Unick GJ, Rosenblum D, Mars S, et al. Intertwined epidemics: national demographic trends  
9 in hospitalizations for heroin-and opioid-related overdoses, 1993–2009. *PloS One*  
10 2013;8(2):e54496. doi:10.1371/journal.pone.0054496  
11
- 12  
13 7. Jürgens R, Csete J, Amon JJ, et al. People who use drugs, HIV, and human rights. *Lancet*  
14 2010;376(9739):475–485. doi:10.1016/S0140-6736(10)60830-6  
15
- 16  
17 8. Amon J, Pearshouse R, Cohen J, et al. Compulsory drug detention centers in China,  
18 Cambodia, Vietnam, and Laos: health and human rights abuses. *Health Hum Rights*  
19 2013;15(2):124–137.  
20
- 21  
22 9. Werb D, Rowell G, Guyatt G, et al. Effect of drug law enforcement on drug market violence:  
23 a systematic review. *Int J Drug Policy* 2011;22(2):87–94. doi:10.1016/j.drugpo.2011.02.002  
24
- 25  
26 10. Csete J, Kamarulzaman A, Kazatchkine M, et al. Public health and international drug policy.  
27 *Lancet* 2016;387(10026):1427–1480. doi:10.1016/S0140-6736(16)00619-X  
28
- 29  
30 11. Global Commission on Drug Policy. Taking Control: Pathways to Drug Policies That Work.  
31 [https://www.globalcommissionondrugs.org/wp-](https://www.globalcommissionondrugs.org/wp-content/uploads/2016/03/GCDP_2014_taking-control_EN.pdf)  
32 [content/uploads/2016/03/GCDP\\_2014\\_taking-control\\_EN.pdf](https://www.globalcommissionondrugs.org/wp-content/uploads/2016/03/GCDP_2014_taking-control_EN.pdf). Published September 2014.  
33 Accessed August 28, 2019.  
34
- 35  
36 12. Wood E, Werb D, Kazatchkine M, et al. Vienna Declaration: a call for evidence-based drug  
37 policies. *Lancet* 2010;376(9738):310–312. doi:10.1016/S0140-6736(10)60958-0  
38
- 39  
40 13. United Nations System Chief Executives Board for Coordination (CEB). Summary of  
41 Deliberations. <https://www.unsceb.org/CEBPublicFiles/CEB-2018-2-SoD.pdf>.  
42 (CEB/2018/2). Published January 18, 2019. Accessed August 28, 2019.  
43
- 44  
45 14. European Monitoring Centre for Drugs and Drug Addiction. Countries.  
46 [http://www.emcdda.europa.eu/countries\\_en](http://www.emcdda.europa.eu/countries_en). Accessed August 28, 2019.  
47
- 48  
49 15. Tharoor A. Map: Drug Decriminalisation Around the World.  
50 <https://www.talkingdrugs.org/decriminalisation>. Published August 23, 2018. Accessed  
51 August 28, 2019.  
52
- 53  
54 16. Eastwood N, Fox E, Rosmarin A. A Quiet Revolution: Drug Decriminalisation Across the  
55 Globe.  
56 [https://www.citywide.ie/download/pdf/a\\_quiet\\_revolution\\_decriminalisation\\_across\\_the\\_glo-](https://www.citywide.ie/download/pdf/a_quiet_revolution_decriminalisation_across_the_globe.pdf)  
57 [be.pdf](https://www.citywide.ie/download/pdf/a_quiet_revolution_decriminalisation_across_the_globe.pdf). Published March 2016. Accessed August 28, 2018.  
58
- 59  
60 17. Nutt D, King LA, Saulsbury W, et al. Development of a rational scale to assess the harm of  
drugs of potential misuse. *Lancet* 2007;369(9566):1047–1053. doi:10.1016/S0140-  
6736(07)60464-4

18. Nutt DJ, King LA, Phillips LD. Drug harms in the UK: a multicriteria decision analysis. *Lancet* 2010;376(9752):1558–1565. doi:10.1016/S0140-6736(10)61462-6
19. Rogeberg O, Bergsvik D, Phillips LD, et al. A new approach to formulating and appraising drug policy: a multi-criterion decision analysis applied to alcohol and cannabis regulation. *Int J Drug Policy* 2018;56:144–152. doi:10.1016/j.drugpo.2018.01.019
20. Sarvet AL, Wall MM, Fink DS, et al. Medical marijuana laws and adolescent marijuana use in the United States: a systematic review and meta-analysis. *Addiction* 2018;113(6):1003–1016. doi:10.1111/add.14136
21. Melchior M, Nakamura A, Bolze C, et al. Does liberalisation of cannabis policy influence levels of use in adolescents and young adults? A systematic review and meta-analysis. *BMJ Open* 2019;9(7):e025880. doi:10.1136/bmjopen-2018-025880
22. Popay J, Roberts H, Sowden A, et al. Guidance on the Conduct of Narrative Synthesis in Systematic Reviews: A Product from the ESRC Methods Programme, Version 1. <https://www.lancaster.ac.uk/shm/research/nssr/research/dissemination/publications.php>. Published April 2006. Accessed August 28, 2019.
23. Moher D, Liberati A, Tetzlaff J, et al. Preferred Reporting Items for Systematic Reviews and Meta-Analyses: the PRISMA Statement. *PLoS Med* 2009;6(7). doi:10.1371/journal.pmed.1000097
24. Downs SH, Black N. The feasibility of creating a checklist for the assessment of the methodological quality both of randomised and non-randomised studies of health care interventions. *J Epidemiol Community Health* 1998;52(6):377–384.
25. Kerr WC, Lui C, Ye Y. Trends and age, period and cohort effects for marijuana use prevalence in the 1984-2015 US National Alcohol Surveys. *Addiction* 2018;113(3):473–481. doi:10.1111/add.14031
26. Allshouse AA, Metz TD. Trends in self-reported and urine toxicology (UTOX)-detected maternal marijuana use before and after legalization. *Am J Obstet Gynecol* 2016;214(1):S444–S445.
27. Straub H, Drennan KJ, Pflugeisen B. Maternal marijuana use: a natural experiment from prohibition to access. *Am J Obstet Gynecol* 2017;216 (S1):S554–S555.
28. Cassidy TA, Green T, Garg P, et al. Up in smoke? Marijuana initiation and prevalence trends in Colorado: 2008 to 2014. *Drug Alcohol Depend* 2015;156:e39.
29. Jones JT, Baldwin A, Shu I. A comparison of meconium screening outcomes as an indicator of the impact of state-level relaxation of marijuana policy. *Drug Alcohol Depend* 2015;156:e104–e105.

- 1  
2  
3 30. Donnelly N, Hall W, Christie P. The effects of the Cannabis Expiation Notice System on the  
4 prevalence of cannabis use in South Australia: evidence from the National Drug Strategy  
5 Household Surveys 1985-95. *Drug Alcohol Rev* 2000;19(3):265–269.  
6  
7
- 8 31. Wall MM, Mauro C, Hasin DS, et al. Prevalence of marijuana use does not differentially  
9 increase among youth after states pass medical marijuana laws: commentary on Stolzenberg  
10 et al. (2015) and reanalysis of US National Survey on Drug Use in Households data 2002-  
11 2011. *Int J Drug Policy* 2016;29:9–13.  
12
- 13 32. Choo EK, Benz M, Zaller N, et al. The impact of state medical marijuana legislation on  
14 adolescent marijuana use. *J Adolesc Health* 2014;55(2):160–166.  
15
- 16 33. Williams J, Bretteville-Jensen AL. Does liberalizing cannabis laws increase cannabis use? *J*  
17 *Health Econ* 2014;36:20–32.  
18
- 19 34. Hasin DS, Wall M, Keyes KM, et al. Medical marijuana laws and adolescent marijuana use  
20 in the USA from 1991 to 2014: results from annual, repeated cross-sectional surveys. *Lancet*  
21 *Psychiatry* 2015;2(7):601–608.  
22  
23
- 24 35. Wagner J, Leonard J, Jensen J, et al. The impact of marijuana legalization on reversible  
25 cerebral vasoconstriction syndrome. *Neurology* 2016;86(S16):115.  
26  
27
- 28 36. Merker AM, Riaz M, Friedman S, et al. Legalization of medicinal marijuana has minimal  
29 impact on use patterns in patients with inflammatory bowel disease. *Inflamm Bowel Dis*  
30 2018;24(11):2309–2314.  
31
- 32 37. Parnes JE, Smith JK, Conner BT. Reefer madness or much ado about nothing? Cannabis  
33 legalization outcomes among young adults in the United States. *Int J Drug Policy*  
34 2018;56:116–120.  
35
- 36 38. Mauro C, Santaella J, Kim JH, et al. Does perceived availability of marijuana explain  
37 changes in marijuana use after medical marijuana law implementation among US adults?  
38 *Drug Alcohol Depend* 2017;171:e134.  
39  
40
- 41 39. Keyes KM, Wall M, Cerda M, et al. How does state marijuana policy affect US youth?  
42 Medical marijuana laws, marijuana use and perceived harmfulness: 1991-2014. *Addiction*  
43 2016;111(12):2187–2195.  
44
- 45 40. Harper S, Strumpf EC, Kaufman JS. Do medical marijuana laws increase marijuana use?  
46 Replication study and extension. *Ann Epidemiol* 2012;22(3):207–212.  
47  
48
- 49 41. Wall MM, Poh E, Cerda M, et al. Adolescent marijuana use from 2002 to 2008: higher in  
50 states with medical marijuana laws, cause still unclear. *Ann Epidemiol* 2011;21(9):714–716.  
51
- 52 42. Martins SS, Mauro CM, Santaella-Tenorio J, et al. State-level medical marijuana laws,  
53 marijuana use and perceived availability of marijuana among the general US population.  
54 *Drug Alcohol Depend* 2016;169:26–32.  
55  
56  
57  
58  
59



- 1
- 2
- 3
- 4 43. Cerda M, Wall M, Feng T, et al. Association of state recreational marijuana laws with
- 5 adolescent marijuana use. *JAMA Pediatr* 2017;171(2):142–149.
- 6
- 7 44. Kosterman R, Bailey JA, Guttmanova K, et al. Marijuana legalization and parents’
- 8 attitudes, use, and parenting in Washington state. *J Adolesc Health* 2016;59(4):450–456.
- 9
- 10 45. Donnelly N, Hall W, Christie P. The effects of partial decriminalisation on cannabis use in
- 11 South Australia, 1985 to 1993. *Aust J Public Health* 1995;19(3):281–287.
- 12
- 13 46. Adam C, Raschzok A. Cannabis policy and the uptake of treatment for cannabis-related
- 14 problems. *Drug Alcohol Rev* 2017;36(2):171–177.
- 15
- 16 47. Cervený J, Chomynova P, Mravčík V, et al. Cannabis decriminalization and the age of onset
- 17 of cannabis use. *Int J Drug Policy* 2017;43:122–129.
- 18
- 19 48. Reith I. Two plants are better than one? *Contemp Drug Probl* 2015;42(4):259–273.
- 20
- 21 49. Félix S, Portugal P. Drug decriminalization and the price of illicit drugs. *Int J Drug Policy*
- 22 2017;39:121–129.
- 23
- 24 50. Gonçalves R, Lourenço A, da Silva SN. A social cost perspective in the wake of the
- 25 Portuguese strategy for the fight against drugs. *Int J Drug Policy* 2015;26(2):199–209.
- 26
- 27 51. Arredondo J, Gaines T, Manian S, et al. The law on the streets: evaluating the impact of
- 28 Mexico’s drug decriminalization reform on drug possession arrests in Tijuana, Mexico. *Int J*
- 29 *Drug Policy* 2018;54:1-8. doi:10.1016/j.drugpo.2017.12.006.
- 30
- 31 52. Feige C, Miron JA. The opium wars, opium legalization and opium consumption in China.
- 32 *Appl Econ Lett* 2008;15(12):911–913.
- 33
- 34 53. Larimer ME, Lee CM, Kilmer JR, et al. Risk perception, access, and use of marijuana among
- 35 young adults following legalization in Washington state. *Alcohol Clin Exp Res*
- 36 2015;39:261A.
- 37
- 38 54. Miech R, Johnston LA, O’Malley P, et al Trends in use of and attitudes toward marijuana
- 39 among youth before and after decriminalization: the case of California 2007-2013. *Drug*
- 40 *Alcohol Depend* 2015;156:e151–e152.
- 41
- 42 55. Wen H, Hockenberry JM, Druss BG. The effect of medical marijuana laws on marijuana-
- 43 related attitude and perception among US adolescents and young adults. *Prev Sci*
- 44 2019;20(2):215–223.
- 45
- 46 56. Wang GS, Davies SD, Halmo LS, et al. Impact of marijuana legalization in Colorado on
- 47 adolescent emergency and urgent care visits. *J Adolesc Health* 2018;63(2):239–241.
- 48
- 49 57. Wang GS, Hall K, Vigil D, et al. Marijuana and acute health care contacts in Colorado. *Prev*
- 50 *Med* 2017;104:24–30.
- 51
- 52
- 53
- 54
- 55
- 56
- 57
- 58
- 59
- 60

- 1  
2  
3 58. Model KE. The effect of marijuana decriminalization on hospital emergency room drug  
4 episodes 1975-1978. *J Am Stat Assoc* 1993;88(423):737–747.
- 5  
6  
7 59. Kim HS, Hall KE, Genco EK, et al. Marijuana tourism and emergency department visits in  
8 Colorado. *N Engl J Med* 2016;374(8):797-798.
- 9  
10 60. Kim HS, Anderson JD, Saghafi O, et al. Cyclic vomiting presentations following marijuana  
11 liberalization in Colorado. *Acad Emerg Med* 2015;22(6):694–699.
- 12  
13 61. Calcaterra SL, Keniston A, Hull ML. The impact of the legalization of recreational  
14 marijuana on a safety-net health system. *J Gen Intern Med* 2018;33(S2):S361.
- 15  
16 62. Wen H, Hockenberry JM. Association of medical and adult-use marijuana laws with opioid  
17 prescribing for Medicaid enrollees. *JAMA Intern Med* 2018;178(5):673–679.
- 18  
19 63. Bradford AC, Bradford WD, Abraham A, et al. Association between US state medical  
20 cannabis laws and opioid prescribing in the Medicare Part D Population. *JAMA Intern Med*  
21 2018;178(5):667–672.
- 22  
23 64. Kim JH, Santaella J, Cerda M, et al. Medical marijuana laws and annual opioid analgesic  
24 sales in the United States. *Drug Alcohol Depend* 2015;156:e111.
- 25  
26 65. Liang D, Bao Y, Wallace M, et al. Medical cannabis legalization and opioid prescriptions:  
27 evidence on US Medicaid enrollees during 1993-2014. *Addiction* 2018;113(11):2060–2070.
- 28  
29 66. Shah AB, Hayes CJ, Lakkad M, et al. Impact of medical marijuana legalization on opioid  
30 use, chronic opioid use and high-risk opioid use. *Value Health* 2018;21(S1):S247.
- 31  
32 67. Bradford AC, Bradford WD. Medical marijuana laws reduce prescription medication use in  
33 Medicare Part D. *Health Aff (Millwood)* 2016;35(7):1230–1236.
- 34  
35 68. Bradford AC, Bradford WD. Medical marijuana laws may be associated with a decline in the  
36 number of prescriptions for Medicaid enrollees. *Health Aff (Millwood)* 2017;36(5):945–951.
- 37  
38 69. Harpin SB, Brooks-Russell A, Ma M, et al. Adolescent marijuana use and perceived ease of  
39 access before and after recreational marijuana implementation in Colorado. *Subst Use*  
40 *Misuse* 2018;53(3):451–456.
- 41  
42 70. Nappe T, Banerji S, Hoyte C. Drug exposure trends since decriminalization of marijuana in  
43 Colorado. *Clin Toxicol* 2016;54(8):712–713.
- 44  
45 71. Onders B, Casavant MJ, Spiller HA, et al. Marijuana Exposure among children younger than  
46 six years in the United States. *Clin Pediatr* 2016;55(5):428–436.
- 47  
48 72. Wang GS, Le Lait MC, Deakyne SJ, et al. Unintentional pediatric exposures to marijuana in  
49 Colorado, 2009-2015. *JAMA Pediatr* 2016;170(9):e160971.
- 50  
51  
52  
53  
54  
55  
56  
57  
58  
59  
60



- 1
- 2
- 3 73. Banerji S, Hoyte C. Marijuana and synthetic cannabinoid patterns in a US state with
- 4 legalized marijuana: a 5-year NPDS review. *Clin Toxicol* 2017;55 (5):418–419.
- 5
- 6
- 7 74. Bjordal M, Garrard A. The impact of marijuana legalization on poison center calls in the
- 8 evergreen state. *Clin Toxicol* 2015;53(7):694.
- 9
- 10 75. Livingston MD, Barnett TE, Delcher C, et al. Recreational cannabis legalization and opioid-
- 11 related deaths in Colorado, 2000-2015. *Am J Public Health* 2017;107(11):1827–1829.
- 12
- 13 76. Bachhuber MA, Saloner B, Cunningham CO, et al. Medical cannabis laws and opioid
- 14 analgesic overdose mortality in the United States, 1999-2010. *JAMA Intern Med*
- 15 2014;174(10):1668–1673.
- 16
- 17 77. Shi Y. Medical marijuana policies and hospitalizations related to marijuana and opioid pain
- 18 reliever. *Drug Alcohol Depend* 2017;173:144–150.
- 19
- 20
- 21 78. Rohda J, Smith K, Smith L, et al. Impact of recreational marijuana legalization on synthetic
- 22 cannabinoid use. *Clin Toxicol* 2017;55(7):780.
- 23
- 24 79. Phillips E, Gazmararian J. Implications of prescription drug monitoring and medical
- 25 cannabis legislation on opioid overdose mortality. *J Opioid Manag* 2017;13(4):229–239.
- 26
- 27
- 28 80. Powell D, Pacula RL, Jacobson M. Do medical marijuana laws reduce addictions and deaths
- 29 related to pain killers? *J Health Econ* 2018;58:29–42.
- 30
- 31 81. Steinemann S, Galanis D, Nguyen T, et al. Motor vehicle crash fatalities and
- 32 undercompensated care associated with legalization of marijuana. *J Trauma Acute Care Surg*
- 33 2018;85(3):566–571.
- 34
- 35 82. Urfer S, Morton J, Beall V, et al. Analysis of DELTA9-tetrahydrocannabinol driving under
- 36 the influence of drugs cases in Colorado from January 2011 to February 2014. *J Anal Toxicol*
- 37 2014;38(8):575–581.
- 38
- 39
- 40 83. Pollini RA, Romano E, Johnson MB, et al. The impact of marijuana decriminalization on
- 41 California drivers. *Drug Alcohol Depend* 2015;150:135–140.
- 42
- 43 84. Ramirez A. Marijuana, other drugs, and alcohol use by drivers in Washington state. *Alcohol*
- 44 *Clin Exp Res* 2017;41:314A.
- 45
- 46 85. Couper FJ, Peterson BL. The prevalence of marijuana in suspected impaired driving cases in
- 47 Washington state. *J Anal Toxicol* 2014;38(8):569–574.
- 48
- 49 86. Kerr T, Small W, Wood E. The public health and social impacts of drug market enforcement:
- 50 a review of the evidence. *Int J Drug Policy* 2005;(16):210-220.
- 51
- 52
- 53 87. McGinty EE, Samples H, Bandara SN, et al. The emerging public discourse on state
- 54 legalization of marijuana for recreational use in the US: analysis of news media coverage,
- 55 2010–2014. *Prev Med* 2016;90:114–120. doi:<https://doi.org/10.1016/j.ypmed.2016.06.040>
- 56
- 57
- 58
- 59
- 60

- 1  
2  
3 88. Firth CL, Maher JE, Dilley JA, et al. Did marijuana legalization in Washington state reduce  
4 racial disparities in adult marijuana arrests? *Subst Use Misuse* 2019;54(9):1582-1587.  
5 doi:10.1080/10826084.2019.1593007  
6  
7  
8 89. Plunk AD, Peglow SL, Harrell PT, et al. Youth and adult arrests for cannabis possession  
9 after decriminalization and legalization of cannabis. *JAMA Pediatr* 2019;173(8):763–769.  
10 doi:10.1001/jamapediatrics.2019.1539  
11  
12 90. Pacula RL, Powell D, Heaton P, et al. Assessing the effects of medical marijuana laws on  
13 marijuana use: the devil is in the details. *J Policy Anal Manage* 2015;34(1):7–31.  
14  
15 91. Shover CL, Davis CS, Gordon S, et al. Association between medical cannabis laws and  
16 opioid overdose mortality has reversed over time. *PNAS* 2019;116(26):12624-12626.  
17 doi:10.1073/pnas.1903434116/-/DCSupplemental  
18  
19 92. International Expert Group on Drug Policy Metrics. Aligning Agendas: Drugs, Sustainable  
20 Development, and the Drive for Policy Coherence. [https://www.ipinst.org/wp-](https://www.ipinst.org/wp-content/uploads/2018/02/1802_Aligning-Agendas.pdf)  
21 [content/uploads/2018/02/1802\\_Aligning-Agendas.pdf](https://www.ipinst.org/wp-content/uploads/2018/02/1802_Aligning-Agendas.pdf). Published February 2018. Accessed  
22 August 28, 2019.  
23  
24  
25  
26  
27  
28  
29  
30  
31  
32  
33  
34  
35  
36  
37  
38  
39  
40  
41  
42  
43  
44  
45  
46  
47  
48  
49  
50  
51  
52  
53  
54  
55  
56  
57  
58  
59  
60

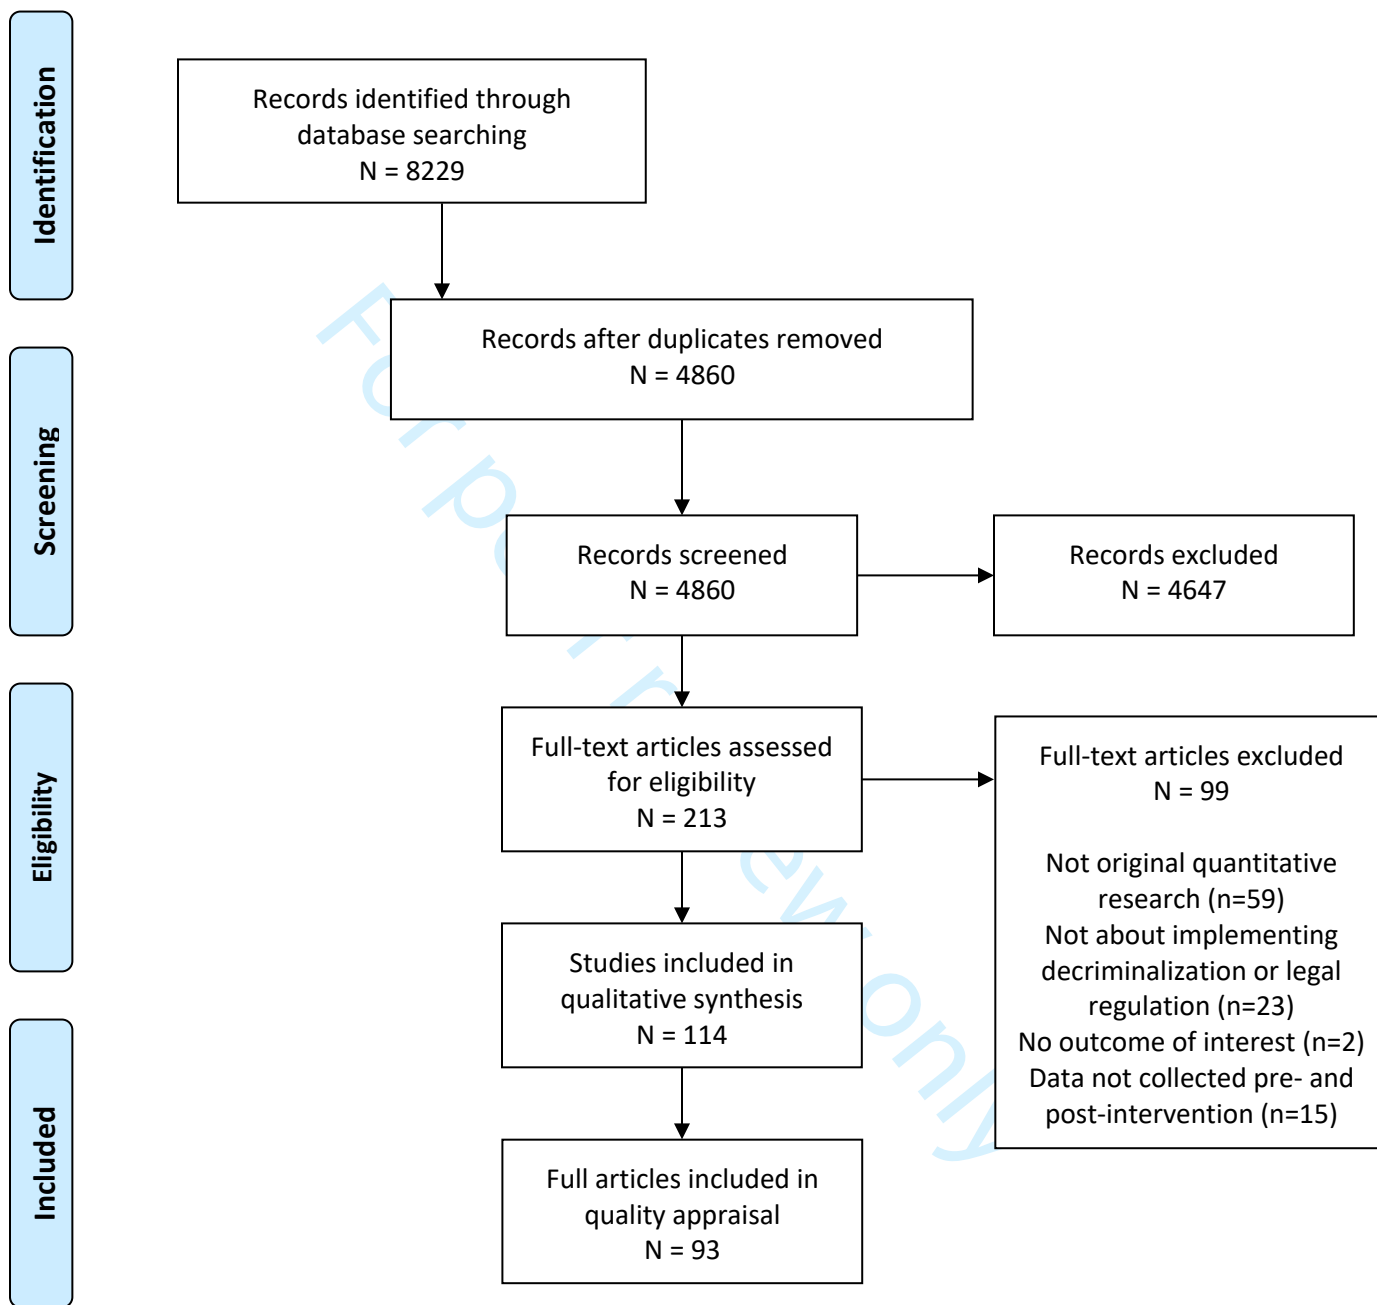

1  
2  
3  
4  
5  
6  
7  
8  
9  
10  
11  
12  
13  
14  
15  
16  
17  
18  
19  
20  
21  
22  
23  
24  
25  
26  
27  
28  
29  
30  
31  
32  
33  
34  
35  
36  
37  
38  
39  
40  
41  
42  
43  
44  
45  
46  
47  
48  
49  
50  
51  
52  
53  
54  
55  
56  
57  
58  
59  
60

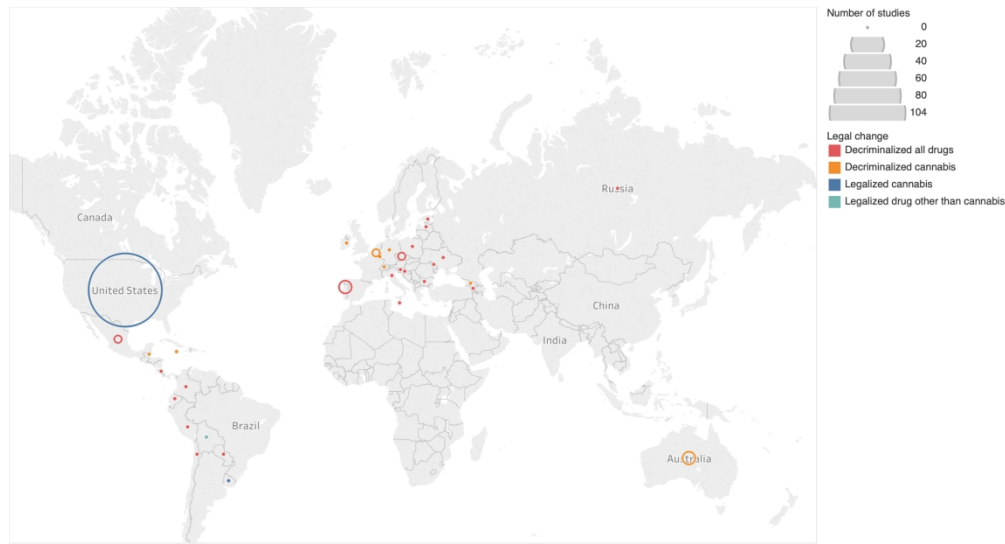

Number of included studies from countries that implemented decriminalization or legal regulation by 2017  
 Note: Policy changes were classified, following the review inclusion criteria, based on the implementation of a change to national or subnational law to decriminalize drug use and/or possession or to legalize at least one class of drugs. We did not evaluate the extent to which legal changes were reflected in policing and criminal justice practice. Implementation of cannabis legalization for medical purposes only is not reflected in this map.

619x332mm (96 x 96 DPI)

1  
2  
3  
4  
5  
6  
7  
8  
9  
10  
11  
12  
13  
14  
15  
16  
17  
18  
19  
20  
21  
22  
23  
24  
25  
26  
27  
28  
29  
30  
31  
32  
33  
34  
35  
36  
37  
38  
39  
40  
41  
42  
43  
44  
45  
46  
47

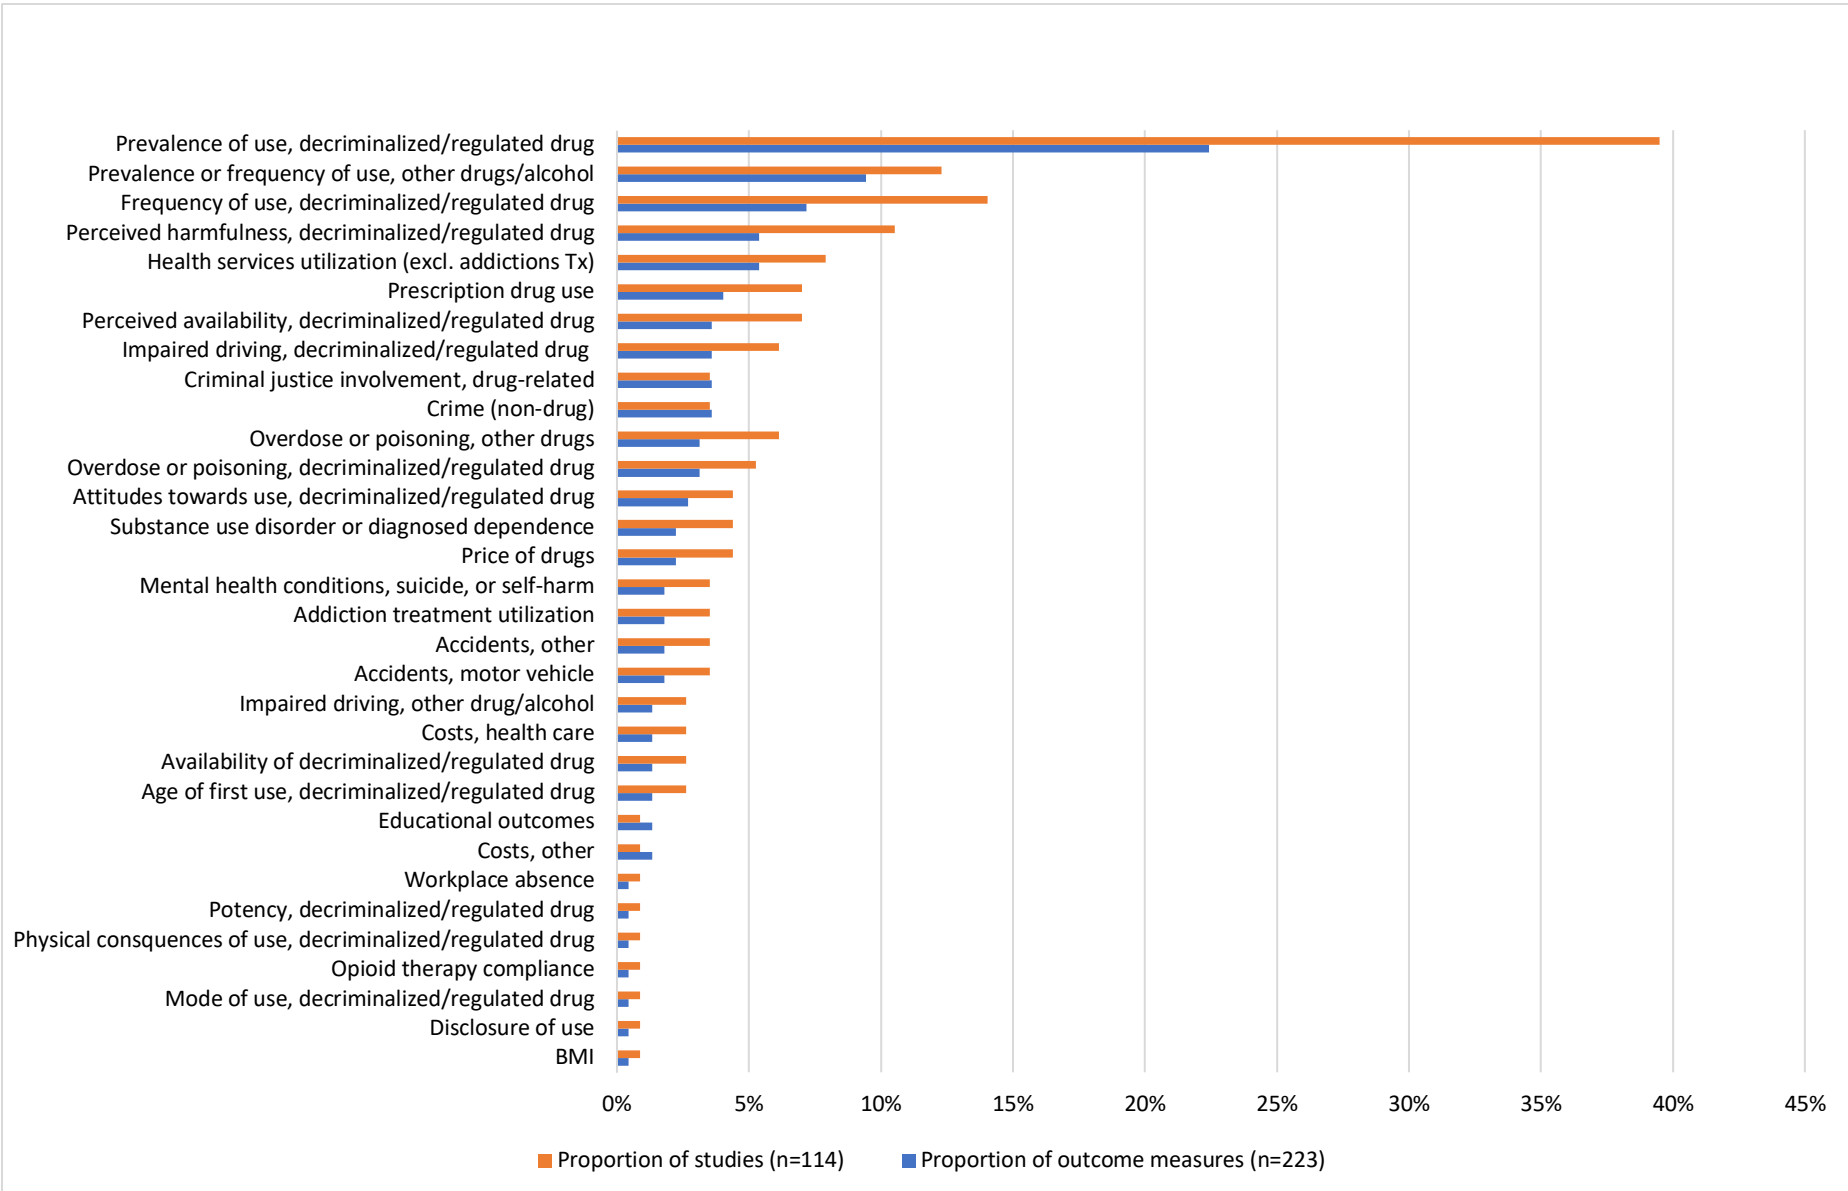

Supplementary Table 1. Included Studies

|    | Reference         | Setting<br>Legal change                                                               | Study design,<br>dates<br>[Comparison<br>group or<br>condition]                                                                            | Sampling<br>approach<br>Sample size                                                                                         | Outcomes                                                                                                                                                                                                                                                                     | Effects                                                                                                                                                                                                                                                                                                                                                                                                                                                                                                                                                                                            | Quality |
|----|-------------------|---------------------------------------------------------------------------------------|--------------------------------------------------------------------------------------------------------------------------------------------|-----------------------------------------------------------------------------------------------------------------------------|------------------------------------------------------------------------------------------------------------------------------------------------------------------------------------------------------------------------------------------------------------------------------|----------------------------------------------------------------------------------------------------------------------------------------------------------------------------------------------------------------------------------------------------------------------------------------------------------------------------------------------------------------------------------------------------------------------------------------------------------------------------------------------------------------------------------------------------------------------------------------------------|---------|
| 1. | Adam 2017         | Belgium,<br>Portugal,<br>France<br><br>Cannabis<br>decriminalization                  | Controlled<br>before-and-<br>after, 1996-2010<br><br>[Austria,<br>Germany,<br>Greece, Ireland,<br>Italy,<br>Netherlands,<br>Spain, Sweden] | Convenience<br>sampling<br><br>89 treatment<br>units                                                                        | <i>Addiction treatment<br/>utilization</i> : # of first-time drug<br>treatment clients reporting<br>cannabis as primary<br>indication, per reporting<br>treatment unit<br><br><i>Prevalence of use,<br/>decriminalized/regulated<br/>drug(s)</i> : past-year cannabis<br>use | No significant effect of<br>decriminalization. $B = 2.66$ , $SE=8.72$ ,<br>$P=0.770$<br><br>No significant effect of<br>decriminalization. $B = 1.88$ , $SE=1.77$ ,<br>$P=0.310$                                                                                                                                                                                                                                                                                                                                                                                                                   | 13      |
| 2. | Allshouse<br>2016 | United States<br><br>Legal regulation<br>of cannabis for<br>recreational use<br>(RCL) | Repeated cross-<br>sectional study,<br>2013; 2014                                                                                          | Population-<br>based;<br>Admin<br>record data<br><br>N=743                                                                  | <i>Prevalence of use,<br/>decriminalized/regulated<br/>drug(s)</i> : self-reported cannabis<br>use during pregnancy<br><br><i>Prevalence of use,<br/>decriminalized/regulated<br/>drug(s)</i> : cannabis-positive<br>urine screen during pregnancy                           | No significant effect of RCL (from 4.5%<br>to<br>7.5%, $p=0.06$ )<br><br>No significant effect of RCL. Adjusted<br>prevalence difference = 0.03, $P=0.99$ .                                                                                                                                                                                                                                                                                                                                                                                                                                        | A<br>*  |
| 3. | Anderson<br>2013  | United States<br><br>Legal regulation<br>of cannabis for<br>medical use<br>(MCL)      | Repeated cross-<br>sectional study,<br>1990-2010                                                                                           | Convenience<br>sampling<br><br><i>Study A</i> :<br>8,271<br>cannabis<br>purchases<br><i>Study B</i> :<br>1071<br>fatalities | <i>Price of drugs</i> : median price<br>of cannabis in state and year<br><br><i>Accidents, motor vehicle</i> :<br>traffic fatality outcomes per<br>100,000; primary outcome is<br>total fatalities.                                                                          | 9.8% decrease in price of high-quality<br>cannabis, controlling for state-specific<br>time trends. Lagged models indicate<br>price reductions not significant until 4 <sup>th</sup><br>year after MCL. Effects on price of low-<br>quality cannabis largely statistically<br>insignificant.<br><br>No significant change in fatalities,<br>controlling for state-specific time trends.<br>In lagged models, MCL associated with<br>8-13% fatality reductions in years 1-4,<br>with reduction attenuated and no longer<br>significant after 5 years, controlling for<br>state-specific time trends. | 11      |

|    |                |                                                                     |                                                                                         |                                                                   |                                                                                                                                          |                                                                                                                                                                                                       |    |
|----|----------------|---------------------------------------------------------------------|-----------------------------------------------------------------------------------------|-------------------------------------------------------------------|------------------------------------------------------------------------------------------------------------------------------------------|-------------------------------------------------------------------------------------------------------------------------------------------------------------------------------------------------------|----|
| 4. | Anderson 2014  | United States<br>Legal regulation of cannabis for medical use (MCL) | Controlled before-and-after study, 1990-2007<br><br>[States that did not implement MCL] | Population-based;<br>Admin record data                            | <i>Mental health conditions, suicide, or self-harm</i> : annual suicide rates per 100,000 among individuals 15+                          | No difference in suicide rate overall. Reduction among males, (log) rate difference = -0.047* (95% CI: -0.089, -0.005). By age, significant reductions among males from 20-39 and among females >=60. | 16 |
| 5. | Anderson 2018  | United States<br>Legal regulation of cannabis for medical use (MCL) | Repeated cross-sectional study, 1992-2015                                               | Population-based;<br>Admin record data<br><br>N= 1224 state-years | <i>Accidents, other</i> : Workplace fatalities by state from the Bureau of Labor Statistics                                              | No difference in fatality rate overall. Reduction among those aged 25-44 only. Adjusted rate ratio = 0.805 (95% CI: 0.662, 0.979).                                                                    | 15 |
| 6. | Anderson 2015  | United States<br>Legal regulation of cannabis for medical use (MCL) | Repeated cross-sectional study, 1993-2011                                               | Population-based;<br>School-based survey<br><br>N=862,695         | <i>Prevalence of use, decriminalized/regulated drug(s)</i> : past 30 day use                                                             | No significant effect of MCL: % difference, combined national and state YRBS = -0.007, SE=0.011, p>0.05.                                                                                              | 15 |
|    |                |                                                                     |                                                                                         |                                                                   | <i>Frequency of use, decriminalized/regulated drug(s)</i> : used ≥ 10 times in past 30 days                                              | No significant effect of MCL: % difference, combined national and state YRBS = -0.004, SE=0.006, p>0.05.                                                                                              |    |
|    |                |                                                                     |                                                                                         |                                                                   | <i>Actual availability of decriminalized/regulated drug(s)</i> : offered, sold, or given an illegal drug on school property in past year | MCL associated with reduction in availability, % difference, combined national and state YRBS = -0.020, SE=0.008, p<0.05;                                                                             |    |
| 7. | Arredondo 2018 | Mexico<br>Decriminalization of all drugs                            | Repeated cross-sectional study, 2009-2014                                               | Population-based;<br>Admin record data                            | <i>Criminal justice involvement</i> : Monthly number of drug possession arrests per precinct.                                            | Decriminalization law not associated with arrests, Beta for ln(possession arrests)=0.187, SE=0.151, p>0.05.                                                                                           | 14 |
|    |                |                                                                     |                                                                                         |                                                                   | <i>Crime (non-drug)</i> : Violent crime arrests (injuries, robbery, homicides)                                                           | Law not associated with arrests, b=0.001, SE=0.090, p>0.05.                                                                                                                                           |    |

|     |                |                                                                                              |                                                                                           |                                                               |                                                                                                                                                                                                            |                                                                                                                                                                                             |     |
|-----|----------------|----------------------------------------------------------------------------------------------|-------------------------------------------------------------------------------------------|---------------------------------------------------------------|------------------------------------------------------------------------------------------------------------------------------------------------------------------------------------------------------------|---------------------------------------------------------------------------------------------------------------------------------------------------------------------------------------------|-----|
|     |                |                                                                                              |                                                                                           |                                                               | <i>Crime (non-drug):</i><br>Non-violent arrests (theft, possession of stolen car)                                                                                                                          | Law not associated with arrests, $b=-0.043$ , $SE=0.071$ , $p>0.05$ .                                                                                                                       |     |
| 8.  | Aydelotte 2017 | United States<br><br>Legal regulation of cannabis for recreational use (RCL)                 | Controlled before-and-after study, 2009-2015<br><br>[8 similar states without MCL or RCL] | Population-based;<br>Admin record data<br><br>N=60,737        | <i>Accidents, motor vehicle:</i><br>Annual number of motor vehicle crash fatalities                                                                                                                        | RCL not associated with crash fatalities, adjusted difference in difference coefficient: +0.2 (95% CI: -0.4, +0.9).                                                                         | 15  |
| 9.  | Bachhuber 2014 | United States<br><br>Legal regulation of cannabis for medical use (MCL)                      | Interrupted time series study, 1999-2010                                                  | Population-based;<br>Admin record data                        | <i>Overdose or poisoning, other drug:</i> opioid analgesic overdose mortality rate                                                                                                                         | MCL associated with reduced mortality, adjusted percentage change in annual rate= -24.8% (95% CI: -37.5, -9.5), $p = .003$ .                                                                | 16  |
| 10. | Banerji 2017   | United States<br><br>Legal regulation of cannabis for recreational use                       | Repeated cross-sectional study, 2011-2015                                                 | Population-based;<br>Admin record data<br><br>N=777 exposures | <i>Overdose or poisoning, decriminalized/regulated drug:</i> cannabis calls to poison control center<br><br><i>Overdose or poisoning, other drug:</i> synthetic cannabinoid calls to poison control center | Apparent increase (from 86 in 2011 to 231 in 2015); no statistical tests reported.<br><br>Apparent decrease (100 in 2013 and 17 in 2014); no statistical tests reported.                    | A * |
| 11. | Bell 2015      | United States<br><br>Legal regulation of cannabis for medical use (MCL) and recreational use | Repeated cross-sectional study, 2008-2014                                                 | Population-based;<br>Admin record data<br>N=29                | <i>Accidents, other:</i><br>hydrocarbon burns referred to the University of Colorado Hospital                                                                                                              | Before MCL (Jan 2008-Aug 2009): 0 cases<br>During MCL (Oct 2009-Dec 2013): 19 cases<br>During recreational legalization (Dec 2013-Aug 2014): 12 cases<br><br>No statistical tests reported. | 11  |
| 12. | Bjordal 2015   | United States<br><br>Legal regulation of cannabis for recreational use                       | Repeated cross-sectional study, 2013-2014                                                 | Population-based;<br>Admin record data<br><br>N=245 exposures | <i>Overdose or poisoning, decriminalized/regulated drug:</i> Cannabis calls to poison control center (p.694)                                                                                               | Apparent increase (from 158 in 2013 to 245 in 2014); no statistical tests reported.                                                                                                         | A * |



|     |               |                                                                     |                                                                                                              |                                                                                            |                                                                                                                                                                                                                                                                                                                                                                                                             |                                                                                                                                                                                                                                                                                                                                                                        |    |
|-----|---------------|---------------------------------------------------------------------|--------------------------------------------------------------------------------------------------------------|--------------------------------------------------------------------------------------------|-------------------------------------------------------------------------------------------------------------------------------------------------------------------------------------------------------------------------------------------------------------------------------------------------------------------------------------------------------------------------------------------------------------|------------------------------------------------------------------------------------------------------------------------------------------------------------------------------------------------------------------------------------------------------------------------------------------------------------------------------------------------------------------------|----|
| 13. | Blachly 1976  | United States<br>Cannabis decriminalization                         | Uncontrolled before-and-after study, 1970; 1975                                                              | Convenience sampling<br>N=627 admissions                                                   | <i>Health services utilization:</i> % of drug abuse admissions to Dammasch State Hospital due to cannabis                                                                                                                                                                                                                                                                                                   | Prevalence from 6.7% (1970) to 2.5% (1975); no statistical tests reported.                                                                                                                                                                                                                                                                                             | 8  |
| 14. | Boyle 2014    | United States<br>Cannabis decriminalization                         | Repeated cross-sectional study, 2011-2013                                                                    | Population-based;<br>Admin record data<br>N=11 incidents                                   | <i>Accidents, other:</i> explosions of gases related to hash oil manufacturing                                                                                                                                                                                                                                                                                                                              | Two events in 2 years prior, nine events in 7 months post-decriminalization (before legal sales); no statistical tests reported.                                                                                                                                                                                                                                       | A* |
| 15. | Bradford 2018 | United States<br>Legal regulation of cannabis for medical use (MCL) | Repeated cross-sectional study, 2010-2015                                                                    | Population-based;<br>Admin record data<br>N=132.6 million physician-drug-year observations | <i>Prescription drug use:</i> total number of daily opioid dose prescriptions filled (in millions)                                                                                                                                                                                                                                                                                                          | MCL associated with fewer daily doses filled in states with active dispensaries (-3.742 million, 95% CI: -6.289, -1.194) and in states with home cultivation (-1.792 million, 95% CI: -3.532, -0.052). Results also varied by type of opioid.                                                                                                                          | 18 |
| 16. | Bradford 2016 | United States<br>Legal regulation of cannabis for medical use (MCL) | Controlled before-and-after study, 2010-2013<br><br>[States without a medical marijuana law at a given time] | Population-based;<br>Admin record data<br>N= 588,808-2,496,608                             | <i>Prescription drug use:</i> among Medicaid Part D enrollees, average daily doses filled annually per physician for FDA-approved drugs treating conditions that cannabis may be used to treat (anxiety, depression, glaucoma, nausea, pain, psychosis, seizures, sleep disorders, spasticity)<br><br><i>Costs, health care:</i> estimated annual change in Medicaid Part D spending (program and enrollee) | MCL associated with statistically significant ( $p<0.05$ ) reductions in daily doses filled for 7 of 9 conditions (difference-in-difference coefficients from -265 daily doses for depression to -1826 for pain), no significant effects for glaucoma or spasticity.<br><br>Estimated prescription drug cost savings from 2010-2013 attributed to MCL = \$515,194,125. | 17 |

|     |                            |                                                                                  |                                                                                                            |                                                                                                      |                                                                                                                                                                                                                                      |                                                                                                                                                                                                                                                                                                     |    |
|-----|----------------------------|----------------------------------------------------------------------------------|------------------------------------------------------------------------------------------------------------|------------------------------------------------------------------------------------------------------|--------------------------------------------------------------------------------------------------------------------------------------------------------------------------------------------------------------------------------------|-----------------------------------------------------------------------------------------------------------------------------------------------------------------------------------------------------------------------------------------------------------------------------------------------------|----|
| 17. | Bradford<br>2017           | United States<br><br>Legal regulation<br>of cannabis for<br>medical use<br>(MCL) | Controlled<br>before-and-after<br>study,<br>2007-2014<br><br>[States without<br>MCL in a given<br>quarter] | Population-<br>based;<br>Admin<br>record data                                                        | <i>Prescription drug use:</i><br>average number of daily<br>prescription drug doses<br>dispensed per fee-for-service<br>Medicaid beneficiary for<br>FDA-approved drugs treating<br>conditions that cannabis may<br>be used to treat. | MCL associated with statistically<br>significant ( $p<0.05$ ) reductions in daily<br>doses per beneficiary for 5 of 9<br>conditions (depression, nausea, pain,<br>psychosis, and seizures). Estimated<br>proportion reductions in dispensed doses<br>ranged from 11% for pain to 17% for<br>nausea. | 17 |
|     |                            |                                                                                  |                                                                                                            |                                                                                                      | <i>Costs, health care:</i> estimated<br>annual change in Medicaid<br>fee-for-service spending on<br>prescription drugs with<br>medical cannabis indications                                                                          | Estimated Medicaid fee-for-service<br>prescription drug cost savings from<br>2007-2014 attributed to MCL = 2,694.1<br>million                                                                                                                                                                       |    |
| 18. | Brooks-<br>Russell<br>2019 | United States<br><br>Legal regulation<br>of cannabis for<br>recreational use     | Repeated cross-<br>sectional study,<br>2013-2015                                                           | Population-<br>based;<br>School-<br>based survey<br><br>N = 26,019<br>(2013)<br>N = 15,970<br>(2015) | <i>Prevalence of use,<br/>decriminalized/regulated<br/>drug(s):</i> lifetime use; past 30-<br>day use.                                                                                                                               | No significant change in lifetime or past<br>30-day use following legal regulation.                                                                                                                                                                                                                 | 15 |
|     |                            |                                                                                  |                                                                                                            |                                                                                                      | <i>Prevalence of use, other drugs<br/>or alcohol:</i> past 30-day use of<br>cigarettes; past 30-day use<br>alcohol; lifetime non-medical<br>prescription drug use; lifetime<br>cocaine use.                                          | Decrease in past 30-day cigarette use<br>from 2013 to 2015 (12.1 to 8.6%,<br>$p<0.01$ ). No significant changes in other<br>drug or alcohol use.                                                                                                                                                    |    |
|     |                            |                                                                                  |                                                                                                            |                                                                                                      | <i>Perceived harmfulness of<br/>decriminalized/regulated<br/>drug(s):</i> high vs. low<br>perceived accessibility,<br>wrongfulness, parental<br>disapproval,<br>and harmfulness.                                                     | Decrease in high perceived harmfulness<br>(52.9% to 47.7%, $p<0.01$ ). No significant<br>changes in other perceptions.                                                                                                                                                                              |    |
|     |                            |                                                                                  |                                                                                                            |                                                                                                      | <i>Frequency of use,<br/>decriminalized/legalized<br/>drug(s):</i> >20 occasions of use<br>in past 30 days, among those<br>who reported past 30-day use.                                                                             | Decrease in frequent use among past-30-<br>day users (33.2% to 26.8%, $p<0.01$ ).                                                                                                                                                                                                                   |    |
|     |                            |                                                                                  |                                                                                                            |                                                                                                      | <i>Prevalence of use,<br/>decriminalized/regulated<br/>drug(s):</i> use on school<br>property, among those who<br>reported past 30-day use.                                                                                          | Decrease in use on school property<br>among past-30-day users (5.7% to 4.4%,<br>$p=0.03$ ).                                                                                                                                                                                                         |    |

|     |                 |                                                                          |                                                                          |                                                             |                                                                                                   |                                                                                                                                                                                                                                                                                                                                                           |     |
|-----|-----------------|--------------------------------------------------------------------------|--------------------------------------------------------------------------|-------------------------------------------------------------|---------------------------------------------------------------------------------------------------|-----------------------------------------------------------------------------------------------------------------------------------------------------------------------------------------------------------------------------------------------------------------------------------------------------------------------------------------------------------|-----|
| 19. | Calcaterra 2018 | United States<br>Legal regulation of cannabis for recreational use (RCL) | Interrupted time series study, 2009-2015                                 | Population-based;<br>Admin record data<br><br>N=370,612     | <i>Health services utilization: cannabis-related hospitalizations</i>                             | RCL associated with an increase in hospitalizations: adjusted annual rates of inpatient and emergent hospitalizations were 2.4 and 4.3 times higher in 2015 as compared to 2009 (p<0.001). A reduced segmented regression model shows a significant increase in slope post-RCL (b= 1.835, SE=0.218, p< 0.0001).                                           | A * |
| 20. | Cassidy 2015    | United States<br>Legal regulation of cannabis for recreational use       | Uncontrolled before-and-after study, 2008-2014                           | Convenience sampling<br><br>N=13,945                        | <i>Prevalence of use, decriminalized/regulated drug(s): among substance use treatment clients</i> | Increase from 21.3% in 2008 to 32.8% in 2014 (p<0.001).                                                                                                                                                                                                                                                                                                   | A * |
|     |                 |                                                                          |                                                                          |                                                             | <i>Prevalence of use, decriminalized/regulated drug(s): past-year initiation</i>                  | No significant change in past-year initiation.                                                                                                                                                                                                                                                                                                            |     |
| 21. | Cerda 2018      | United States<br>Legal regulation of cannabis for medical use (MCL)      | Controlled before-and-after study, 1991-2015<br><br>[States without MCL] | Population-based;<br>School-based survey<br><br>N=1,179,372 | <i>Prevalence of use, decriminalized/regulated drug(s): past 30-day use</i>                       | Decrease in 8 <sup>th</sup> grade (aOR=0.72; 95% CI: 0.62, 0.84). No significant changes in 10 <sup>th</sup> or 12 <sup>th</sup> .                                                                                                                                                                                                                        | 18  |
|     |                 |                                                                          |                                                                          |                                                             | <i>Prevalence of use, other drugs or alcohol: binge drinking in past two weeks</i>                | Decrease in 8 <sup>th</sup> grade (aOR=0.72; 95% CI: 0.65, 0.79). No significant changes in 10 <sup>th</sup> or 12 <sup>th</sup> .                                                                                                                                                                                                                        |     |
|     |                 |                                                                          |                                                                          |                                                             | <i>Prevalence of use, other drugs or alcohol: past 30-day cigarette use</i>                       | Decrease in 8 <sup>th</sup> grade (aOR=0.74; 95% CI: 0.66, 0.82) and increase in 12 <sup>th</sup> grade (aOR=1.17; 95% CI: 1.06, 1.29).                                                                                                                                                                                                                   |     |
|     |                 |                                                                          |                                                                          |                                                             | <i>Prevalence of use, other drugs or alcohol: past 30-day non-medical prescription drug use</i>   | Decrease in non-medical prescription opioid use in 8 <sup>th</sup> grade (aOR=0.43; 95% CI: 0.36, 0.52) and increase in 12 <sup>th</sup> grade (aOR=1.42; 95% CI: 1.21, 1.66).<br>Decrease in prescription amphetamine use (aOR=0.71; 95% CI: 0.63, 0.81) and prescription tranquilizer use (aOR=0.83; 95% CI: 0.71, 0.98) in 8 <sup>th</sup> grade only. |     |
|     |                 |                                                                          |                                                                          |                                                             | <i>Prevalence of use, other drugs or alcohol: past 30-day non-cannabis illicit drug use</i>       | Decrease in 8 <sup>th</sup> grade only (aOR=0.77; 95% CI: 0.69, 0.86).                                                                                                                                                                                                                                                                                    |     |

|     |              |                                                                              |                                                                                                            |                                                                |                                                                                                                                               |                                                                                                                                                                                                                                     |    |
|-----|--------------|------------------------------------------------------------------------------|------------------------------------------------------------------------------------------------------------|----------------------------------------------------------------|-----------------------------------------------------------------------------------------------------------------------------------------------|-------------------------------------------------------------------------------------------------------------------------------------------------------------------------------------------------------------------------------------|----|
| 22. | Cerda 2017   | United States<br><br>Legal regulation of cannabis for recreational use (RCL) | Controlled before-and-after study, 2010-2015                                                               | Population-based; School-based survey<br><br>N=253,902         | <i>Prevalence of use, decriminalized/regulated drug(s):</i> past 30-day use                                                                   | Increase in 8 <sup>th</sup> and 10 <sup>th</sup> grade in Washington but not Colorado (difference-in-difference WA vs. non-RCL= 3.2% in 8 <sup>th</sup> grade, p=0.03; 5.0% in 10 <sup>th</sup> , p=0.01).                          | 18 |
|     |              |                                                                              |                                                                                                            |                                                                | <i>Perceived harmfulness of decriminalized/regulated drug(s):</i> great or moderate vs. low or no risk                                        | Decreased perceived harmfulness in 8 <sup>th</sup> and 10 <sup>th</sup> grade in Washington but not Colorado (difference-in-difference WA vs. non-RCL= -9.3% in 8 <sup>th</sup> grade, p=0.01; -9.0% in 10 <sup>th</sup> , p=0.02). |    |
| 23. | Cerveny 2017 | Czech Republic<br><br>Cannabis decriminalization                             | Repeated cross-sectional study, 2008; 2012                                                                 | Population-based; Household survey<br>N=1524                   | <i>Age of first use, decriminalized/regulated drug</i>                                                                                        | No significant effect of decriminalization on hazard of initiation.                                                                                                                                                                 | 13 |
| 24. | Choo 2014    | United States<br><br>Legal regulation of cannabis for medical use (MCL)      | Controlled before-and-after study, 1991-2011<br><br>[Matched to state in geographic proximity without MCL] | Population-based; School-based survey<br><br>N=11,703,100      | <i>Prevalence of use, decriminalized/regulated drug(s):</i> past 30-day use                                                                   | No significant effect of MCL.                                                                                                                                                                                                       | 16 |
| 25. | Chu 2014     | United States<br><br>Legal regulation of cannabis for medical use (MCL)      | Controlled before-and-after study, 1988-2008<br><br>[Non-MCL state years]                                  | Population-based; Admin record data<br><br>N=12,157 city-years | <i>Criminal justice involvement:</i> adult male cannabis possession arrest rates                                                              | No significant effect of MCL.                                                                                                                                                                                                       | 15 |
|     |              |                                                                              |                                                                                                            |                                                                | <i>Criminal justice involvement:</i> ratio of cannabis possession arrests to all arrests among adult males                                    | MCL associated with 9.3-12.1% increase in ratio of cannabis to non-cannabis arrests.                                                                                                                                                |    |
|     |              |                                                                              |                                                                                                            |                                                                | <i>Addiction treatment utilization:</i> ratio of cannabis-related to all treatment admissions among adult male non-criminal justice referrals | MCL associated with 9.1-10.5% increase in ratio of cannabis to non-cannabis admissions.                                                                                                                                             |    |

|     |               |                                                                     |                                                              |                                                                   |                                                                                                                                                                    |                                                                                                                                                                                    |    |
|-----|---------------|---------------------------------------------------------------------|--------------------------------------------------------------|-------------------------------------------------------------------|--------------------------------------------------------------------------------------------------------------------------------------------------------------------|------------------------------------------------------------------------------------------------------------------------------------------------------------------------------------|----|
| 26. | Couper 2014   | United States<br>Cannabis decriminalization                         | Repeated cross-sectional study, 2009-2013                    | Convenience sampling<br>N=25,719                                  | <i>Impaired driving, decriminalized/regulated drug(s):</i> prevalence of THC in blood toxicology results from suspected impaired driving cases in Washington State | Increased prevalence of active THC after decriminalization (24.9% vs. 19.1%, $p<0.05$ ).                                                                                           | 9  |
| 27. | Donnelly 1995 | Australia<br>Cannabis decriminalization                             | Repeated cross-sectional study, 1985-1993                    | Population-based;<br>Household survey<br><br>N= 2257 to 3500      | <i>Prevalence of use, decriminalized/regulated drug(s):</i> lifetime cannabis use                                                                                  | No significant interaction between survey year and state: lifetime use did not increase at a significantly greater rate in South Australia (decriminalized).                       | 15 |
|     |               |                                                                     |                                                              |                                                                   | <i>Perceived availability of decriminalized/regulated drug(s):</i> been offered cannabis                                                                           | No significant interaction between survey year and state.                                                                                                                          |    |
|     |               |                                                                     |                                                              |                                                                   | <i>Attitudes towards use, decriminalized/regulated drug(s):</i> would take cannabis if offered by a trusted friend                                                 | Proportion reporting willingness to try increased from 10% in 1985 to 18% in 1991 in South Australia, significant positive interaction between survey year and state ( $p<0.05$ ). |    |
|     |               |                                                                     |                                                              |                                                                   | <i>Prevalence of use, decriminalized/regulated drug(s):</i> weekly use of cannabis                                                                                 | No significant interaction between survey year and state.                                                                                                                          |    |
| 28. | Donnelly 2000 | Australia<br>Cannabis decriminalization                             | Repeated cross-sectional study, 1985; 1988; 1991; 1993; 1995 | Population-based;<br>Household survey                             | <i>Prevalence of use, decriminalized/regulated drug(s):</i> lifetime use                                                                                           | Greater increase in lifetime use in South Australia (decriminalized) than the rest of Australia (test for trend, $p<0.05$ ).                                                       | 11 |
|     |               |                                                                     |                                                              |                                                                   | <i>Prevalence of use, decriminalized/regulated drug(s):</i> weekly use                                                                                             | Rate of change for South Australia not significantly different from rest of the country.                                                                                           |    |
| 29. | Dutra 2018    | United States<br>Legal regulation of cannabis for medical use (MCL) | Repeated cross-sectional study, 2008-2015                    | Population-based;<br>Household survey<br><br>N= 91,123 to 10,1973 | <i>Mental health conditions, suicide, or self-harm:</i> state prevalence of serious mental illness                                                                 | Liberal MCL associated with 0.2% increase in state prevalence of mental illness ( $b=0.002$ , $SE=0.001$ , $p=0.015$ ). No significant effect of restrictive MCL.                  | 17 |

|     |                |                                                                              |                                                                                  |                                        |                                                                                                                                                                                                                                                                                                                                                                                                   |                                                                                                                                                                                                                                                                   |    |
|-----|----------------|------------------------------------------------------------------------------|----------------------------------------------------------------------------------|----------------------------------------|---------------------------------------------------------------------------------------------------------------------------------------------------------------------------------------------------------------------------------------------------------------------------------------------------------------------------------------------------------------------------------------------------|-------------------------------------------------------------------------------------------------------------------------------------------------------------------------------------------------------------------------------------------------------------------|----|
| 30. | Estoup 2016    | United States<br><br>Legal regulation of cannabis for recreational use (RCL) | Repeated cross-sectional study, 2010-2015                                        | Convenience sampling<br><br>N=262      | <i>Mental health conditions, suicide, or self-harm</i> : # of reported psychological, behavioral, relational consequences of cannabis use<br><br><i>Perceived harmfulness of decriminalized/regulated drug(s)</i> : # of cons of continued cannabis use endorsed in decisional balance matrix<br><br><i>Frequency of use, decriminalized/legalized drug(s)</i> : # of times used in past 3 months | RCL associated with increased negative consequences of use, mediated by increased perceived harmfulness ( <i>b</i> for indirect effect=3.73; 95% CI=0.33, 9.55).<br><br>RCL associated with increased perceived harmfulness.<br><br>No significant effect of RCL. | 11 |
| 31. | Feige 2008     | China<br><br>Legal regulation of opium                                       | Repeated cross-sectional study, 1801-1902                                        | Unspecified                            | <i>Actual availability of decriminalized/regulated drug(s)</i> :<br>Quantity of opium exports (number of chests per capita)<br><br><i>Price of drugs</i> :<br>Price of opium at the scales in India                                                                                                                                                                                               | No significant effect of legal regulation.<br><br>No significant effect of legal regulation.                                                                                                                                                                      | 16 |
| 32. | Félix 2017     | Portugal<br><br>Decriminalization of all drugs                               | Controlled before-and-after study, 1990-2010<br><br>[13 EU countries and Norway] | Convenience sampling                   | <i>Price of drugs</i> : price data from (1) EU country reports to the Commission on Narcotic Drugs and (2) the European Monitoring Center for Drugs and Drug Addiction                                                                                                                                                                                                                            | Drug prices increased in Portugal following decriminalization, but difference-in-difference and synthetic control analyses indicate no statistically significant change in slope of drug prices.                                                                  | 14 |
| 33. | Gonçalves 2015 | Portugal<br><br>Decriminalization of all drugs                               | Repeated cross-sectional study, 1999-2010                                        | Population-based;<br>Admin record data | <i>Costs, health care</i> : combined direct costs of (1) drug treatment, prevention and harm reduction and (2) hospital treatment for hepatitis and HIV                                                                                                                                                                                                                                           | 12% increase over first 5 years following decriminalization, 9% over first 11 years.                                                                                                                                                                              | 13 |

|     |             |                                                                         |                                          |                                    |                                                                                                                                                                                                                                                                                                                                                                                                                             |                                                                                                                                                                                                                                                                                                                                                                                                                                                                                                                       |    |
|-----|-------------|-------------------------------------------------------------------------|------------------------------------------|------------------------------------|-----------------------------------------------------------------------------------------------------------------------------------------------------------------------------------------------------------------------------------------------------------------------------------------------------------------------------------------------------------------------------------------------------------------------------|-----------------------------------------------------------------------------------------------------------------------------------------------------------------------------------------------------------------------------------------------------------------------------------------------------------------------------------------------------------------------------------------------------------------------------------------------------------------------------------------------------------------------|----|
|     |             |                                                                         |                                          |                                    | <p><i>Costs, non-health care:</i> combined indirect costs of lost income and production due to (1) drug addiction treatment and (2) drug-related death.</p> <p><i>Costs, non-health care:</i> combined direct costs of social rehabilitation and legal system costs related to drugs</p> <p><i>Costs, non-health care:</i> indirect costs of lost income and production of individuals arrested for drug-related crimes</p> | <p>37% reduction over first 5 years following decriminalization, 29% over first 11 years.</p> <p>17% reduction over first 11 years.</p> <p>5% reduction over first 5 years following decriminalization, 24% over first 11 years.</p>                                                                                                                                                                                                                                                                                  |    |
| 34. | Gorman 2007 | United States<br><br>Legal regulation of cannabis for medical use (MCL) | Interrupted time series study, 1994-2002 | Convenience sampling               | <p><i>Prevalence of use, decriminalized/regulated drug(s):</i> prevalence of positive cannabis urine screen among arrestees.</p> <p><i>Health services utilization:</i> proportion of emergency department visits in which cannabis was mentioned in CA, WA, and CO DAWN sites</p>                                                                                                                                          | <p>No significant effect of MCL on positive cannabis tests in CA or OR.</p> <p>No significant effect of MCL on ED visits mentioning cannabis.</p>                                                                                                                                                                                                                                                                                                                                                                     | 12 |
| 35. | Grant 2018  | United States<br><br>Legal regulation of cannabis for medical use (MCL) | Cohort study, 1998-2012                  | Convenience sampling<br><br>N=1359 | <p><i>Prevalence of use, decriminalized/regulated drug(s):</i> use in last 30 days of substance use case management program</p> <p><i>Prevalence of use, other drugs or alcohol:</i> # of days of use, in past 30 days, of alcohol or drugs</p>                                                                                                                                                                             | <p>Participants exiting case management after MCL were more likely to report past 30-day use (AOR = 2.1, <math>p &lt; 0.0001</math>).</p> <p>Participants exiting case management after MCL used alcohol (<math>b = 0.48</math>, <math>SE=0.24</math>, <math>p &lt; 0.05</math>), illicit methadone (<math>b = 0.67</math>, <math>SE=0.22</math>, <math>p &lt; 0.005</math>), and other opioids (<math>b = 0.52</math>, <math>SE=0.15</math>), <math>p &lt; 0.01</math>) more frequently than the pre-MCL cohort.</p> | 12 |
| 36. | Grucza 2018 | United States<br><br>Cannabis                                           | Controlled before-and-after study,       | Population-based;<br>School-       | <i>Criminal justice involvement:</i> arrest rates for cannabis                                                                                                                                                                                                                                                                                                                                                              | Arrest rates decreased by 75% among youth (95% CI: -0.89, -0.44) and 78% among adults (95% CI: -0.89, -0.52).                                                                                                                                                                                                                                                                                                                                                                                                         | 18 |



|     |             |                                                                          |                                                                                                               |                                                                |                                                                                                                                                                                                                                                                                        |                                                                                                                                                                                                                    |    |
|-----|-------------|--------------------------------------------------------------------------|---------------------------------------------------------------------------------------------------------------|----------------------------------------------------------------|----------------------------------------------------------------------------------------------------------------------------------------------------------------------------------------------------------------------------------------------------------------------------------------|--------------------------------------------------------------------------------------------------------------------------------------------------------------------------------------------------------------------|----|
|     |             | decriminalization                                                        | 2007-2015<br>[States without decriminalization, legal regulation, or change in penalties related to cannabis] | based survey<br>N= 622,848                                     | possession among minors (18 or under) and adults<br><i>Prevalence of use, decriminalized/regulated drug(s):</i> past 30-day use<br><i>Frequency of use, decriminalized/regulated drug(s):</i> frequency of past 30-day use                                                             | Decriminalization was not significantly associated with use.<br>Decriminalization was not significantly associated with frequency of use.                                                                          |    |
| 37. | Grucza 2015 | United States<br>Legal regulation of cannabis for medical use (MCL)      | Controlled before-and-after study, 1990-2010<br>[States without MCL]                                          | Population-based;<br>Admin record data<br>N=662,993            | <i>Mental health conditions, suicide, or self-harm:</i> suicide deaths                                                                                                                                                                                                                 | MCL not significantly associated with suicide rate overall, or when stratified by sex.                                                                                                                             | 16 |
| 38. | Harper 2012 | United States<br>Legal regulation of cannabis for medical use (MCL)      | Controlled before-and-after study, 2002-2009<br>[States without MCL]                                          | Population-based<br>Household survey                           | <i>Prevalence of use, decriminalized/regulated drug(s):</i> past-month use among adolescents<br><i>Perceived harmfulness of decriminalized/regulated drug(s):</i> perceived riskiness of monthly use among adolescents                                                                 | *Reanalysis of Wall 2011 (#106)<br>Difference-in-difference estimates indicate no significant effects of MCL, after accounting for state-level covariates and measurement error.<br>No significant effects of MCL. | 15 |
| 39. | Harpin 2018 | United States<br>Legal regulation of cannabis for recreational use (RCL) | Repeated cross-sectional study, 2013-2014                                                                     | Population-based;<br>School-based survey<br>N=11,931 to 12,240 | <i>Prevalence of use, decriminalized/regulated drug(s):</i> lifetime and past 30-day use<br><i>Mode of use, decriminalized/regulated drug(s):</i> smoking vs. other modes, among past-month users<br><i>Perceived harmfulness of decriminalized/regulated drug(s):</i> high versus low | No significant change after RCL.<br>No significant change after RCL.<br>No significant change after RCL.                                                                                                           | 13 |



|     |            |                                                                              |                                                                                                               |                                                                |                                                                                                             |                                                                                                                                                                                                            |     |
|-----|------------|------------------------------------------------------------------------------|---------------------------------------------------------------------------------------------------------------|----------------------------------------------------------------|-------------------------------------------------------------------------------------------------------------|------------------------------------------------------------------------------------------------------------------------------------------------------------------------------------------------------------|-----|
|     |            |                                                                              |                                                                                                               |                                                                | perceived harmfulness and wrongfulness of use                                                               |                                                                                                                                                                                                            |     |
|     |            |                                                                              |                                                                                                               |                                                                | <i>Perceived availability of decriminalized/regulated drug(s): high versus low perceived ease of access</i> | Post-RCL year associated with high perceived access, (AOR= 1.21, 95% CI: 1.09, 1.34).                                                                                                                      |     |
| 40. | Hasin 2017 | United States<br><br>Legal regulation of cannabis for medical use (MCL)      | Controlled before-and-after study, 1991-1992; 2001-2001; 2012-2013<br><br>[late MCL states, never MCL states] | Population-based;<br>Household survey<br><br>N=118,497         | <i>Prevalence of use, decriminalized/regulated drug(s): past-year use</i>                                   | MCL associated with greater increase in past-year use (difference-in-difference coefficient=1.4 percentage points, SE=0.5, p=0.004). Results varied by state and early vs. late MCL adoption.              | 17  |
|     |            |                                                                              |                                                                                                               |                                                                | <i>Substance use disorder or diagnosed dependence: DSM-IV Cannabis Use Disorder in past year</i>            | MCL associated with greater increase in CUD (difference-in-difference coefficient=0.7, SE=0.3, p=0.03).                                                                                                    |     |
| 41. | Hasin 2015 | United States<br><br>Legal regulation of cannabis for medical use (MCL)      | Repeated cross-sectional study, 1991-2014                                                                     | Population-based;<br>School-based survey<br><br>N=1,098,270    | <i>Prevalence of use, decriminalized/regulated drug(s): past 30-day use</i>                                 | No significant effect of MCL overall, but interaction with grade: reduced use among 8 <sup>th</sup> graders post-MCL (AOR=0.73, 95% CI: 0.63, 0.84), but not 10 <sup>th</sup> or 12 <sup>th</sup> graders. | 18  |
| 42. | Hasin 2017 | United States<br><br>Legal regulation of cannabis for medical use (MCL)      | Repeated cross-sectional study, 1991-1992; 2001-2002; 2012-2013                                               | Population-based<br>Household survey                           | <i>Impaired driving, decriminalized/regulated drug(s)</i>                                                   | Prevalence of cannabis-impaired driving increased more in states that passed MCL, but not significantly so (p=0.07).                                                                                       | A * |
|     |            |                                                                              |                                                                                                               |                                                                | <i>Impaired driving, other drugs or alcohol: driving under the influence of alcohol</i>                     | No significant effect of MCL.                                                                                                                                                                              |     |
| 43. | Hoyte 2015 | United States<br><br>Legal regulation of cannabis for recreational use (RCL) | Repeated cross-sectional study, 2007-2014                                                                     | Population-based;<br>Admin record data<br><br>N= 42 fatalities | <i>Accidents, motor vehicle: THC-positive motor driver fatalities in Denver County, CO</i>                  | Fatalities increased from 0.28/month from July 1, 2007 to Dec 31, 2008 to 0.5/month from 2009-2012 to 0.56/month from Jan 1, 2013 to June 30, 2014 (post-RCL). No statistical tests reported.              | A * |
| 44. | Huber 2016 | United States<br><br>Legal regulation of cannabis for                        | Repeated cross-sectional study, 1970-2012                                                                     | Population-based;<br>Admin record data                         | <i>Crime (non-drug): state violent crime rates (FBI Uniform Crime Reports)</i>                              | MCL associated with 12.9% reduction in rate (b=-0.129, SE= 0.036, p<0.01).                                                                                                                                 | 14  |

|     |               |                                                                              |                                                                                           |                                                          |                                                                                                                                  |                                                                                                                                                                                                                                                |    |
|-----|---------------|------------------------------------------------------------------------------|-------------------------------------------------------------------------------------------|----------------------------------------------------------|----------------------------------------------------------------------------------------------------------------------------------|------------------------------------------------------------------------------------------------------------------------------------------------------------------------------------------------------------------------------------------------|----|
|     |               | medical use (MCL)                                                            |                                                                                           |                                                          | <i>Crime (non-drug):</i> state property crime rates                                                                              | MCL associated with 9.2% reduction in rate ( $b=-0.092$ , $SE=0.032$ , $p<0.01$ ).                                                                                                                                                             |    |
| 45. | Hunt 2017     | United States<br><br>Legal regulation of cannabis for recreational use (RCL) | Controlled before-and-after study, 2013;2014<br><br>[WA and OR before RCL implementation] | Population-based;<br>Household survey<br><br>N=5576      | <i>Price of drugs:</i> consumer-reported price per gram                                                                          | No statistically significant effects of implementing legal retail cannabis sales in CO and WA on prices paid for recreational or medical purposes, 4-5 months later.                                                                           | 16 |
| 46. | Johnson 2017  | United States<br><br>Legal regulation of cannabis for medical use (MCL)      | Repeated cross-sectional study, 1991-2011                                                 | Population-based;<br>School-based survey<br>N=715,014    | <i>Prevalence of use, decriminalized/regulated drug(s):</i> past 30-day use among adolescents                                    | MCL associated with decreased odds of past 30-day use (AOR=0.93, 95% CI: 0.86, 0.99). Policy details associated with lower (e.g., years since MCL and liberal provisions) and higher (e.g., voluntary vs. mandatory patient registration) use. | 17 |
|     |               |                                                                              |                                                                                           |                                                          | <i>Frequency of use, decriminalized/regulated drug(s):</i> past 30-day heavy use ( $\geq 20$ times)                              | MCL not associated with odds of heavy use (AOR=1.00, 95% CI: 0.89, 1.13).                                                                                                                                                                      |    |
| 47. | Jones 2015    | United States<br><br>Legal regulation of cannabis for recreational use (RCL) | Repeated cross-sectional study, 2012; 2014                                                | Unspecified                                              | <i>Prevalence of use, decriminalized/regulated drug(s):</i> THCA-positive meconium specimens from high-risk newborns in Colorado | RCL associated with increase in THCA-positive specimens (from 10.6% to 11.7%) and with increased mean THCA concentrations in positive specimens.                                                                                               | A* |
| 48. | Jones 2018    | United States<br><br>Legal regulation of cannabis for recreational use (RCL) | Repeated cross-sectional study, 2013-2015                                                 | Convenience sampling<br><br>N=1413                       | <i>Frequency of use, decriminalized/regulated drug(s):</i> Categories from no use to daily use.                                  | No statistically significant difference in use frequency between pre- and post-RCL periods.                                                                                                                                                    | 10 |
|     |               |                                                                              |                                                                                           |                                                          | <i>Prevalence of use, other drugs or alcohol:</i> Frequency of cannabis use within alcohol use frequency groups                  | Strength of the relationship between alcohol and cannabis use decreased after RCL (from $r=0.54$ in Nov 2013 to 0.33 in Mar 2015).                                                                                                             |    |
| 49. | Kerr DCR 2017 | United States<br><br>Legal regulation of cannabis for recreational use (RCL) | Repeated cross-sectional study, 2012-2016                                                 | Population-based;<br>School-based survey<br><br>N=10,924 | <i>Prevalence of use, decriminalized/regulated drug(s):</i> past 30-day use                                                      | No significant association between RCL and past 30-day use overall (AOR=1.21, $p=0.48$ ) but increasing secular trend. RCL associated with increased cannabis use among heavy alcohol users (AOR=1.73, $p=0.0076$ ).                           | 17 |

|     |                 |                                                                                            |                                                |                                                           |                                                                                                                                                   |                                                                                                                                                                            |    |
|-----|-----------------|--------------------------------------------------------------------------------------------|------------------------------------------------|-----------------------------------------------------------|---------------------------------------------------------------------------------------------------------------------------------------------------|----------------------------------------------------------------------------------------------------------------------------------------------------------------------------|----|
|     |                 |                                                                                            |                                                |                                                           | <i>Prevalence of use, other drugs or alcohol: past 30-day cigarette use</i>                                                                       | No significant association with RCL.                                                                                                                                       |    |
|     |                 |                                                                                            |                                                |                                                           | <i>Prevalence of use, other drugs or alcohol: past 30-day heavy alcohol use</i>                                                                   | No significant association with RCL.                                                                                                                                       |    |
| 50. | Kerr WC 2018    | United States<br>Legal regulation of cannabis for medical (MCL) and recreational use (RCL) | Repeated cross-sectional study, 1984-2015      | Population-based;<br>Household survey<br><br>N=37,359     | <i>Prevalence of use, decriminalized/regulated drug(s): past-year use</i>                                                                         | No significant association between MCL (home growing or dispensaries) or RCL and past-year use, among both women and men.                                                  | 17 |
| 51. | Kerr DCR 2018   | United States<br>Legal regulation of cannabis for recreational use (RCL)                   | Repeated cross-sectional study, 2008-2016      | Population-based;<br>School-based survey<br><br>N=281,752 | <i>Prevalence of use, decriminalized/regulated drug(s): past 30-day use</i>                                                                       | RCL associated with increased past 30-day use among university students (AOR= 1.29, 95% CI: 1.13, 1.48).                                                                   | 17 |
|     |                 |                                                                                            |                                                |                                                           | <i>Prevalence of use, other drugs or alcohol: past 30-day tobacco use</i>                                                                         | RCL associated with decreased tobacco use (AOR= 0.71, $p=0.0001$ ).                                                                                                        |    |
|     |                 |                                                                                            |                                                |                                                           | <i>Prevalence of use, other drugs or alcohol: past 30-day alcohol use</i>                                                                         | RCL not associated with alcohol use ( $p=0.59$ ).                                                                                                                          |    |
|     |                 |                                                                                            |                                                |                                                           | <i>Prevalence of use, other drugs or alcohol: past 30-day illicit drug use (non-cannabis)</i>                                                     | RCL not associated with illicit drug use ( $p=0.78$ ).                                                                                                                     |    |
| 52. | Keyes 2016      | United States<br>Legal regulation of cannabis for medical use (MCL)                        | Repeated cross-sectional study, 1991-2014      | Population-based;<br>School-based survey<br><br>N=973,089 | <i>Perceived harmfulness of decriminalized/regulated drug(s): great or moderate vs. low perceived risk of physical harm due to occasional use</i> | No significant association with MCL in all grades, 10 <sup>th</sup> or 12 <sup>th</sup> , but increased perceived harm in 8 <sup>th</sup> (AOR= 1.21, 95% CI: 1.08, 1.36). | 15 |
|     |                 |                                                                                            |                                                |                                                           | <i>Prevalence of use, decriminalized/regulated drug(s): past 30-day use</i>                                                                       | Adjusting for perceived harmfulness, significant negative association between MCL and use in 8 <sup>th</sup> grade only (AOR= 0.81, 95% CI: 0.72, 0.92).                   |    |
| 53. | Khatapoush 2004 | United States<br>Legal regulation                                                          | Repeated cross-sectional study, 1995;1997;1999 | Population-based;<br>Household                            | <i>Prevalence of use, decriminalized/regulated drug(s): past-month use</i>                                                                        | No statistically significant change over time in California (MCL state) or other states.                                                                                   | 10 |

|     |                                     |                                                                          |                                                      |                                                    |                                                                                                                           |                                                                                                                                                             |    |
|-----|-------------------------------------|--------------------------------------------------------------------------|------------------------------------------------------|----------------------------------------------------|---------------------------------------------------------------------------------------------------------------------------|-------------------------------------------------------------------------------------------------------------------------------------------------------------|----|
|     |                                     | of cannabis for medical use (MCL)                                        |                                                      | survey<br>N=15,567                                 | <i>Perceived availability of decriminalized/regulated drug(s)</i>                                                         | No statistically significant change over time in California (MCL state) or other states.                                                                    |    |
|     |                                     |                                                                          |                                                      |                                                    | <i>Prevalence of use, other drugs or alcohol: past-year use of other drugs.</i>                                           | No statistically significant change over time in California (MCL state) or other states.                                                                    |    |
| 54. | Kim, Anderson et al. 2015           | United States<br>Cannabis decriminalization                              | Repeated cross-sectional study, 2008-2009; 2010-2011 | Population-based;<br>Admin record data<br>N=2574   | <i>Health services utilization: emergency department visits for cyclic vomiting</i>                                       | Decriminalization associated with increase in visits (prevalence ratio= 1.92, 95% CI: 1.33, 2.79).                                                          | 15 |
| 55. | Kim, Hall, et al. 2016              | United States<br>Legal regulation of cannabis for recreational use (RCL) | Repeated cross-sectional study, 2012-2014            | Population-based;<br>Admin record data             | <i>Health services utilization: cannabis-related emergency department visits</i>                                          | RCL associated with increase in cannabis-related ED visits by Colorado residents (rate ratio; RR=1.46, $p>0.001$ ) and non-residents (RR=1.17, $p>0.001$ ). | 14 |
| 56. | Kim, Santaella et al. 2015          | United States<br>Legal regulation of cannabis for medical use (MCL)      | Repeated cross-sectional study, 1999-2011            | Population-based;<br>Admin record data             | <i>Prescription drug use: annual opioid sales in morphine-equivalent doses</i>                                            | Adjusting for increasing secular trend, MCL associated with 1% reduction in opioid sales per year of MCL ( $b=-0.01$ , $p=0.0016$ ).                        | A* |
| 57. | Kim 2017                            | United States<br>Legal regulation of cannabis for medical use (MCL)      | Repeated cross-sectional study, 2004-2013            | Population-based;<br>Household survey              | <i>Prevalence of use, other drugs or alcohol: past-month nonmedical use of prescription opioids</i>                       | No significant difference in prevalence post-MCL for youth, young adults, or adults 26+.                                                                    | A* |
| 58. | Kim, Santaella-Tenorio, et al. 2016 | United States<br>Legal regulation of cannabis for medical use (MCL)      | Repeated cross-sectional study, 1999-2013            | Population-based;<br>Admin record data<br>N=68,394 | <i>Impaired driving, other drugs or alcohol: positive opioid tests among driver fatalities in motor vehicle accidents</i> | MCL not significantly associated with opioid presence overall, but with reduction among decedents age 24-40 (AOR post-MCL vs. pre=0.50, 95% CI=0.37, 0.67). | 17 |
| 59. | Kosterman 2016                      | United States<br>Legal regulation of cannabis for                        | Interrupted time series study, 1985-2014             | Convenience sampling<br>N=395                      | <i>Frequency of use, decriminalized/regulated drug(s): past-month frequency</i>                                           | Frequency of use increased post-RCL (from 4-6 to 10 times/month, $p<0.05$ ).                                                                                | 8  |

|     |              |                                                                              |                                           |                                        |                                                                                                                                                                                                                    |                                                                                                                           |     |
|-----|--------------|------------------------------------------------------------------------------|-------------------------------------------|----------------------------------------|--------------------------------------------------------------------------------------------------------------------------------------------------------------------------------------------------------------------|---------------------------------------------------------------------------------------------------------------------------|-----|
|     |              | recreational use (RCL)                                                       |                                           |                                        | among WA parents with any past-year use                                                                                                                                                                            |                                                                                                                           |     |
|     |              |                                                                              |                                           |                                        | <i>Substance use disorder or diagnosed dependence: meets DSM-IV criteria for cannabis use disorder</i>                                                                                                             | No statistically significant change post-RCL.                                                                             |     |
|     |              |                                                                              |                                           |                                        | <i>Perceived harmfulness of decriminalized/regulated drug(s): approval and perceived harmfulness of cannabis use</i>                                                                                               | Approval increased and perceived harmfulness decreased following RCL ( $p<0.05$ ).                                        |     |
| 60. | Larimer 2015 | United States<br><br>Legal regulation of cannabis for recreational use (RCL) | Cohort study                              | Unspecified<br><br>N= 1095             | <i>Frequency of use, decriminalized/regulated drug(s): # of times used in past month among 12-17 year olds</i>                                                                                                     | No significant change associated with RCL.                                                                                | A * |
|     |              |                                                                              |                                           |                                        | <i>Perceived harmfulness of decriminalized/regulated drug(s): perceived risk due to regular and occasional use</i>                                                                                                 | Perceived risk from regular use decreased among males but not females ( $p$ for interaction=0.017).                       |     |
|     |              |                                                                              |                                           |                                        | <i>Perceived availability of decriminalized/regulated drug(s)</i>                                                                                                                                                  | No significant change associated with RCL.                                                                                |     |
|     |              |                                                                              |                                           |                                        | <i>Prevalence of use, other drugs or alcohol: number of drinks consumed per week.</i>                                                                                                                              | RCL associated with increased number of drinks per week ( $p<0.01$ ), beyond time trends.                                 |     |
| 61. | Liang 2018   | United States<br><br>Legal regulation of cannabis for medical use (MCL)      | Repeated cross-sectional study, 1993-2014 | Population-based;<br>Admin record data | <i>Prescription drug use: # of filled opioid prescriptions, dosage of filled prescriptions in morphine-equivalent doses, and related Medicaid spending for Schedule II opioids (e.g., hydrocodone, oxycodone).</i> | MCL not associated not associated with Schedule II opioid use.                                                            | 15  |
|     |              |                                                                              |                                           |                                        | <i>Prescription drug use: as above, for Schedule III opioids (e.g. codeine).</i>                                                                                                                                   | MCL associated with reductions in Schedule III opioid prescriptions (-29.6%, 95% CI: -2.4%, -56.7%), doses, and spending. |     |

|     |                     |                                                                          |                                                                                               |                                          |                                                                                                                                  |                                                                                                                                                 |    |
|-----|---------------------|--------------------------------------------------------------------------|-----------------------------------------------------------------------------------------------|------------------------------------------|----------------------------------------------------------------------------------------------------------------------------------|-------------------------------------------------------------------------------------------------------------------------------------------------|----|
| 62. | Livingston 2017     | United States<br>Legal regulation of cannabis for recreational use (RCL) | Interrupted time series study, 2000-2015                                                      | Population-based;<br>Admin record data   | <i>Overdose or poisoning, other drugs</i> : deaths with ICD-10 code indicating opioid poisoning                                  | RCL associated with reduction in opioid poisoning deaths, adjusting for comparison state trends (-0.68 deaths per month, 95% CI: -1.35, -0.03). | 16 |
| 63. | Lo 2015             | United States<br>Legal regulation of cannabis for recreational use (RCL) | Uncontrolled before-and-after study, 2013-2015                                                | Convenience sampling<br><br>N= 2186      | <i>Prevalence of use, decriminalized/regulated drug(s)</i> : positive cannabinoid screen among high-risk opioid therapy patients | RCL associated with increase in positive THC screens (30% of visits to 36%, $p=0.0003$ ).                                                       | A* |
|     |                     |                                                                          |                                                                                               |                                          | <i>Opioid therapy compliance</i> : non-compliance (illicit opioids use or non-use of prescription)                               | RCL not associated with compliance.                                                                                                             |    |
| 64. | Lynne-Landsman 2013 | United States<br>Legal regulation of cannabis for medical use (MCL)      | Switching replications study, 2003-2011                                                       | Population-based;<br>School-based survey | <i>Prevalence of use, decriminalized/regulated drug(s)</i> : lifetime and past-month                                             | MCL not associated with use (1 of 20 planned comparisons significant, expected by chance alone).                                                | 15 |
|     |                     |                                                                          |                                                                                               |                                          | <i>Frequency of use, decriminalized/legalized drug(s)</i> : daily or weekly use among lifetime users                             | MCL not associated with frequency (1 of 20 planned comparisons significant, expected by chance alone).                                          |    |
| 65. | Martins 2016        | United States<br>Legal regulation of cannabis for medical use (MCL)      | Repeated cross-sectional study, 2004-2013                                                     | Population-based;<br>Household survey    | <i>Prevalence of use, decriminalized/regulated drug(s)</i> : past-month use                                                      | MCL associated with greater past-month use among adults 26+ (AOR=1.24, 95% CI: 1.16, 1.31), but not among ages 12-17 or 18-25.                  | 16 |
|     |                     |                                                                          |                                                                                               |                                          | <i>Perceived availability of decriminalized/regulated drug(s)</i> : fairly or very easy to obtain vs. other                      | MCL associated with greater availability among adults 26+ (AOR=1.11, 95% CI: 1.07, 1.15), but not among ages 12-17 or 18-25.                    |    |
| 66. | Mason 2016          | United States<br>Legal regulation of cannabis for recreational use (RCL) | Controlled before-and-after study, 2010-2013<br><br>[students completed follow up before RCL] | Convenience sampling<br><br>N= 238       | <i>Prevalence of use, decriminalized/regulated drug(s)</i> : past 30-day use                                                     | Post-RCL subject group not significantly associated with use (AOR= 2.80, 95% CI: 0.94-8.34).                                                    | 13 |
|     |                     |                                                                          |                                                                                               |                                          | <i>Prevalence of use, other drugs or alcohol</i> : use of cigarettes or alcohol vs. cannabis (indicating substitution effect)    | Post-RCL subject group significantly less likely to use cigarettes or alcohol versus cannabis ( $p<0.05$ ).                                     |    |



|     |             |                                                                     |                                           |                                                     |                                                                                                                                                               |                                                                                                                                                                                                                                                                                              |    |
|-----|-------------|---------------------------------------------------------------------|-------------------------------------------|-----------------------------------------------------|---------------------------------------------------------------------------------------------------------------------------------------------------------------|----------------------------------------------------------------------------------------------------------------------------------------------------------------------------------------------------------------------------------------------------------------------------------------------|----|
| 67. | Masten 2014 | United States<br>Legal regulation of cannabis for medical use (MCL) | Interrupted time series study, 1992-2009  | Population-based;<br>Admin record data<br>N=245,495 | <i>Impaired driving, decriminalized/regulated drug(s):</i> proportion of fatal-crash-involved drivers (decedents and survivors) who test cannabinoid-positive | Significant policy effect found in 3 of 12 MCL states, with increases of 2.1-6.0 percentage points among all drivers and 4.6-9.6 among fatally injured drivers in CA, HI, and OR (adjusted for changes in testing and national trends). These were step increases rather than upward trends. | 14 |
| 68. | Mauro 2019  | United States<br>Legal regulation of cannabis for medical use (MCL) | Repeated cross-sectional study, 2004-2013 | Population-based;<br>Household survey               | <i>Prevalence of use, decriminalized/regulated drug(s):</i> past-month use                                                                                    | No significant effect of MCL among men or women aged 12-17 or 18-25, but significant increases for ages 26+ among men (+1.7 percentage points, $p < 0.001$ ) and women (+ 1.1%, $p = 0.013$ ).                                                                                               | 16 |
|     |             |                                                                     |                                           |                                                     | <i>Frequency of use, decriminalized/legalized drug(s):</i> daily use among past-year users                                                                    | Significant effect of MCL among men aged 18-25 (+ 2.4%, $p = 0.047$ ), and both men and women age 26+ (men + 2.8%, $p = 0.014$ ; women + 3.4 %, $p = 0.003$ ).                                                                                                                               |    |
|     |             |                                                                     |                                           |                                                     | <i>Substance use disorder or diagnosed dependence:</i> met DSM-IV criteria for cannabis use disorder                                                          | No statistically significant effect of MCL for any age-gender group.                                                                                                                                                                                                                         |    |
| 69. | Mauro 2017  | United States<br>Legal regulation of cannabis for medical use (MCL) | Repeated cross-sectional study, 2004-2013 | Population-based;<br>Household survey               | <i>Prevalence of use, decriminalized/regulated drug(s):</i> past-month use                                                                                    | MCL associated with increased use among adults 26-39 [AOR=1.2, 95% CI: 1.1, 1.3], 40-64 [AOR=1.4, 95% CI: 1.2, 1.5], and 65+ [AOR=2.6, 95% CI: 1.5, 4.6]. Association partially mediated by perceived access.                                                                                | A* |
| 70. | Merker 2018 | United States<br>Legal regulation of cannabis for medical use (MCL) | Repeated cross-sectional study, 2012-2017 | Convenience sampling<br>N=302                       | <i>Prevalence of use, decriminalized/regulated drug(s):</i> current use among Inflammatory Bowel Disease patients                                             | Increase in use post-MCL (12.3% to 22.8% of patients, $p=0.0008$ ), but no significant increase in reported medical use.                                                                                                                                                                     | 12 |
| 71. | Miech 2015  | United States<br>Cannabis decriminalization                         | Repeated cross-sectional study, 2007-2013 | Population-based;<br>School-based survey            | <i>Prevalence of use, decriminalized/regulated drug(s):</i> lifetime, past-year, past 30-day use                                                              | [Decriminalization in CA in 2010]<br>8 <sup>th</sup> and 10 <sup>th</sup> grades: differences in use between CA residents and other states limited to select years, not sustained over time. 12 <sup>th</sup> grade: past-year use higher                                                    | 12 |



|     |             |                                                                              |                                              |                                                          |                                                                                                                                                              |                                                                                                                                                                                                                       |    |
|-----|-------------|------------------------------------------------------------------------------|----------------------------------------------|----------------------------------------------------------|--------------------------------------------------------------------------------------------------------------------------------------------------------------|-----------------------------------------------------------------------------------------------------------------------------------------------------------------------------------------------------------------------|----|
|     |             |                                                                              |                                              | N=320,809                                                |                                                                                                                                                              | among CA residents vs. other states in 2010-2013.                                                                                                                                                                     |    |
|     |             |                                                                              |                                              |                                                          | <i>Perceived harmfulness of decriminalized/regulated drug(s):</i> great vs. less-than-great perceived risk of regular use                                    | 8 <sup>th</sup> and 10 <sup>th</sup> grades: only one significant difference (8 <sup>th</sup> grade in 2012). 12 <sup>th</sup> grade: lower perceived risk among CA residents vs. other states in 2012-2013.          |    |
|     |             |                                                                              |                                              |                                                          | <i>Perceived availability of decriminalized/regulated drug(s):</i> easy vs. less-than-easy perceived access                                                  | 8 <sup>th</sup> and 10 <sup>th</sup> grades: only one significant difference (8 <sup>th</sup> grade in 2011). 12 <sup>th</sup> grade: higher perceived availability among CA residents vs. other states in 2012 only. |    |
|     |             |                                                                              |                                              |                                                          | <i>Attitudes towards use, decriminalized/regulated drug(s):</i> strong disapproval of adult use vs. other                                                    | 8 <sup>th</sup> and 10 <sup>th</sup> grades: only one significant difference (8 <sup>th</sup> grade in 2012). 12 <sup>th</sup> grade: less strong disapproval among CA residents vs. other states in 2012-2013        |    |
|     |             |                                                                              |                                              |                                                          | <i>Attitudes towards use, decriminalized/regulated drug(s):</i> definitely or probably expect to use five years from present (only 12 <sup>th</sup> graders) | 12 <sup>th</sup> grade: greater expected use among CA residents vs. other states in 2012-2013.                                                                                                                        |    |
| 72. | Miller 2017 | United States<br><br>Legal regulation of cannabis for recreational use (RCL) | Repeated cross-sectional study, 2005-2015    | Population-based;<br>School-based survey<br><br>N=13,335 | <i>Prevalence of use, decriminalized/regulated drug(s):</i> past 30-day use                                                                                  | RCL associated with increase of 2.0-3.5 percentage points (12-22%), adjusting for linear secular trend [passage of RCL, additional effect of legal store openings not statistically significant].                     | 16 |
|     |             |                                                                              |                                              |                                                          | <i>Frequency of use, decriminalized/legalized drug(s):</i> past 30-day frequency                                                                             | RCL associated with increase of 0.5 days per month, adjusting for linear secular trend [passage of RCL, additional effect of legal store openings not significant].                                                   |    |
|     |             |                                                                              |                                              |                                                          | <i>Prevalence of use, other drugs or alcohol</i>                                                                                                             | RCL passage not associated with changes. In 2015 (legal stores), decrease in tobacco and increase in other illegal drugs, but findings not robust.                                                                    |    |
| 73. | Model 1993  | United States<br><br>Cannabis decriminalization                              | Controlled before-and-after study, 1975-1978 | Population-based;<br>Admin record data                   | <i>Health services utilization:</i> non-cannabis drug mentions at ER visits                                                                                  | Decriminalization associated with 12% fewer drug mentions at ER visits ( $b=-0.133$ , $SE=0.053$ , $p<0.01$ ), with stronger effects in initial years.                                                                | 16 |

|     |             |                                                                                                    |                                                            |                                                             |                                                                                                                                                                        |                                                                                                                                                                                                     |     |
|-----|-------------|----------------------------------------------------------------------------------------------------|------------------------------------------------------------|-------------------------------------------------------------|------------------------------------------------------------------------------------------------------------------------------------------------------------------------|-----------------------------------------------------------------------------------------------------------------------------------------------------------------------------------------------------|-----|
|     |             | n                                                                                                  | [States that did not not decriminalize]                    |                                                             | <i>Health services utilization:</i> cannabis drug mentions at ER visits                                                                                                | Decriminalization associated with 64% more cannabis mentions ( $b=-0.642$ , $SE=0.112$ , $p<0.01$ ), with stronger effects in later years.                                                          |     |
| 74. | Morris 2014 | United States<br>Legal regulation of cannabis for medical use (MCL)                                | Repeated cross-sectional study, 1990-2006                  | Population-based;<br>Admin record data                      | <i>Crime (non-drug):</i> rates of violent crime (homicide, rape, robbery, assault)<br><i>Crime (non-drug):</i> rates of property crime (burglary, larceny, auto theft) | MCL associated with 2.4% reduction in homicide rate ( $p<0.01$ ).<br>No significant association between MCL and property crimes.                                                                    | 16  |
| 75. | Nappe 2016  | United States<br>Legal regulation of cannabis for recreational use (RCL)                           | Repeated cross-sectional study. 2010-2015                  | Population-based;<br>Admin record data<br>N=5231 exposures  | <i>Overdose or poisoning, decriminalized/regulated drug:</i> cannabis exposures reported to the National Poison Data System in Colorado                                | RCL associated with increase in cannabis exposures (86 in 2011 to 231 in 2015).                                                                                                                     | A * |
| 76. | Onders 2016 | United States<br>Legal regulation of cannabis for medical use (MCL)                                | Repeated cross-sectional study 2000-2013                   | Population-based;<br>Admin record data<br>N= 1969 exposures | <i>Overdose or poisoning, decriminalized/regulated drug:</i> cannabis exposures among children <6 reported to the National Poison Data System                          | MCL associated with increased exposures (rate ratio for post vs. pre-MCL=2.25, 95% CI: 1.45, 3.51). Exposures peaked in the year following RCL.                                                     | 13  |
| 77. | Pacula 2010 | United States<br>Cannabis decriminalization and legal regulation of cannabis for medical use (MCL) | Repeated cross-sectional study, 1987-2003                  | Convenience sampling                                        | <i>Price of drugs:</i> price per gram paid at the last transaction among arrestees                                                                                     | Decriminalization and MCL associated with higher prices (indicating increased demand).                                                                                                              | 13  |
| 78. | Pacula 2015 | United States<br>Legal regulation of cannabis for medical use (MCL)                                | Controlled before-and-after study, 1992-2011 and 1997-2011 | Population-based;<br>Admin record data<br>N=973             | <i>Addiction treatment utilization:</i> number of treatment admissions with cannabis as primary indication                                                             | MCL associated with 14% reduction in cannabis admissions (difference-in-difference = $-0.136$ , $SE=0.067$ , $p<0.05$ ). Larger effect size for non-criminal justice referrals. Partially offset by | 15  |

|     |               |                                                                          |                                           |                                                      |                                                                                                                            |                                                                                                                                                                                                                          |    |
|-----|---------------|--------------------------------------------------------------------------|-------------------------------------------|------------------------------------------------------|----------------------------------------------------------------------------------------------------------------------------|--------------------------------------------------------------------------------------------------------------------------------------------------------------------------------------------------------------------------|----|
|     |               |                                                                          | [State-years without MML]                 | Household survey<br>N=112,926                        |                                                                                                                            | increase in admissions associated with dispensaries.                                                                                                                                                                     |    |
|     |               |                                                                          |                                           |                                                      | <i>Prevalence of use, decriminalized/regulated drug(s): past 30-day use</i>                                                | No overall significant association between MCL and use.                                                                                                                                                                  |    |
|     |               |                                                                          |                                           |                                                      | <i>Frequency of use, decriminalized/regulated drug(s): heavy use (&gt;20 of last 30 days), # of days of use in past 30</i> | No significant association between MCL and frequency of use.                                                                                                                                                             |    |
| 79. | Parnes 2018   | United States<br>Legal regulation of cannabis for recreational use (RCL) | Repeated cross-sectional study, 2013-2015 | Convenience sampling<br>N=5241                       | <i>Prevalence of use, decriminalized/regulated drug(s): past 30-day use</i>                                                | No significant association between RCL and use among CO undergraduates.                                                                                                                                                  | 12 |
| 80. | Phillips 2017 | United States<br>Legal regulation of cannabis for medical use (MCL)      | Repeated cross-sectional study, 2011-2014 | Population-based;<br>Admin record data<br>N=188,266  | <i>Overdose or poisoning, other drugs: state-level age-adjusted opioid-related mortality rate</i>                          | MCL associated with 21.7% increase in opioid-related mortality ( $p < 0.0001$ ) but interacted with prescription drug monitoring programs such that rates decreased in states with both policies.                        | 15 |
| 81. | Plunk 2016    | United States<br>Legal regulation of cannabis for medical use (MCL)      | Repeated cross-sectional study, 2000-2014 | Population-based;<br>Household survey<br>N=5,483,715 | <i>Educational outcomes: high school non-completion</i>                                                                    | High-school age exposure to MCL not associated with non-completion overall, but with increase in probability of failing to complete conditioned on completing the 12 <sup>th</sup> grade (AOR=1.11, 95% CI: 1.05, 1.17). | 16 |
|     |               |                                                                          |                                           |                                                      | <i>Educational outcomes: college non-enrollment among high school graduates</i>                                            | High-school age exposure to MCL associated with college non-enrollment (AOR = 1.09, 95% CI: 1.04, 1.14). Dose-response relationship with years of exposure.                                                              |    |
|     |               |                                                                          |                                           |                                                      | <i>Educational outcomes: college non-completion among college entrants aged 25+</i>                                        | High-school age exposure to MCL associated with increase in probability of degree non-completion (AOR = 1.03, 95% CI: 1.01, 1.06).                                                                                       |    |

|     |              |                                                                         |                                                                                                                        |                                                                                              |                                                                                                                                           |                                                                                                                                                        |    |
|-----|--------------|-------------------------------------------------------------------------|------------------------------------------------------------------------------------------------------------------------|----------------------------------------------------------------------------------------------|-------------------------------------------------------------------------------------------------------------------------------------------|--------------------------------------------------------------------------------------------------------------------------------------------------------|----|
|     |              |                                                                         |                                                                                                                        |                                                                                              | <i>Prevalence of use, decriminalized/regulated drug(s): past-month use</i>                                                                | High-school age exposure to MCL not significantly associated with use.                                                                                 |    |
|     |              |                                                                         |                                                                                                                        |                                                                                              | <i>Frequency of use, decriminalized/regulated drug(s): daily use (40 or more times/month)</i>                                             | High-school age exposure to MCL not significantly associated with use overall, but among 12 <sup>th</sup> graders only (AOR=1.62, 95% CI: 1.04, 2.54). |    |
| 82. | Pollini 2015 | United States<br><br>Cannabis decriminalization                         | Repeated cross-sectional study<br><br>Roadside Survey, 2010; 2012<br><br>Fatality Analysis Reporting System, 2008-2012 | Population-based;<br>Admin record data<br><br>Roadside Survey, N=379-515<br><br>FARS, N=2860 | <i>Impaired driving, decriminalized/regulated drug(s): proportion of drivers testing THC-positive in roadside survey</i>                  | No statistically significant change in THC-positivity following decriminalization.                                                                     | 13 |
|     |              |                                                                         |                                                                                                                        |                                                                                              | <i>Impaired driving, decriminalized/regulated drug(s): presence of cannabinoids among fatally injured drivers</i>                         | Increase in cannabinoid prevalence in 2012 as compared to the pre-decriminalization period (AOR = 1.67, 95% CI: 1.28, 2.18).                           |    |
| 83. | Powell 2018  | United States<br><br>Legal regulation of cannabis for medical use (MCL) | Repeated cross-sectional study, 1999-2013                                                                              | Population-based;<br>Admin record data                                                       | <i>Overdose or poisoning, other drugs: deaths related to prescription opioids and heroin</i>                                              | Existence of MCL not significantly associated with overdose mortality (only active dispensaries associated with reduction in deaths).                  | 15 |
|     |              |                                                                         |                                                                                                                        |                                                                                              | <i>Addiction treatment utilization: number of treatment episodes related to pain reliever misuse</i>                                      | Existence of MCL not significantly associated with overdose mortality (only active dispensaries associated with reduction).                            |    |
|     |              |                                                                         |                                                                                                                        |                                                                                              | <i>Prevalence of use, other drugs or alcohol: self-reported nonmedical use of pain relievers (National Survey on Drug Use and Health)</i> | No statistically significant association between MCL and use.                                                                                          |    |
|     |              |                                                                         |                                                                                                                        |                                                                                              | <i>Prescription drug use: morphine-equivalent doses of opioids distributed to legal medical markets</i>                                   | No statistically significant association between MCL and use over full time period.                                                                    |    |
| 84. | Prue 2014    | United States<br><br>Peyote decriminalization                           | Repeated cross-sectional study, 1985-2010                                                                              | Population-based;<br>Household survey                                                        | <i>Prevalence of use, decriminalized/regulated drug(s): peyote use</i>                                                                    | Use among American Indians increased from 1% in 1994 (year of American Indian Religious Freedom Act) to 10% in                                         | 7  |

|     |                |                                                                          |                                                                                               |                                 |                                                                                                                                                                                                                                              |                                                                                                                                         |    |
|-----|----------------|--------------------------------------------------------------------------|-----------------------------------------------------------------------------------------------|---------------------------------|----------------------------------------------------------------------------------------------------------------------------------------------------------------------------------------------------------------------------------------------|-----------------------------------------------------------------------------------------------------------------------------------------|----|
|     |                | n                                                                        |                                                                                               | N=886,088                       |                                                                                                                                                                                                                                              | 1999. Use among non-American Indians remained steady <2%.                                                                               |    |
|     |                |                                                                          |                                                                                               |                                 | <i>Age of first use, decriminalized/regulated drug: age at first use of peyote</i>                                                                                                                                                           | No significant change in age at first use among American Indians or non-American Indians following decriminalization.                   |    |
| 85. | Ramirez 2017   | United States<br>Legal regulation of cannabis for recreational use (RCL) | Repeated cross-sectional study, 2014;2015                                                     | Unspecified<br>N=2400           | <i>Impaired driving, decriminalized/regulated drug(s): daytime prevalence of cannabis-positive drivers</i>                                                                                                                                   | Statistically significant increase post-RCL (7.8% to 18.9% after one year).                                                             | A* |
| 86. | Reith 2015     | International<br>Cannabis decriminalization                              | Controlled before-and-after study, 1980-2012<br><br>[Country-years without decriminalization] | Unspecified<br>N=102 countries  | <i>Actual availability of decriminalized/regulated drug(s): kg of cannabis seized and number of plants eradicated divided by population in millions</i>                                                                                      | Decriminalization associated with increased plant eradication ( $p<0.05$ ), but not seizures.                                           | 10 |
| 87. | Rodriguez 2016 | United States<br>Legal regulation of cannabis for recreational use (RCL) | Cohort study, 2009-2015                                                                       | Convenience sampling<br>N= 1698 | <i>Prevalence of use, decriminalized/regulated drug(s): positive urine toxicology among pregnant young women</i><br><br><i>Disclosure of use, decriminalized/regulated drug(s): agreement between self-reported use and urine toxicology</i> | Increased cannabis-positive screens post-RCL (16.2 to 20.2%, $p=0.048$ ).<br><br>Improved agreement post-RCL (kappa = 0.504 vs. 0.191). | A* |

|     |                        |                                                                          |                                                                               |                                                                  |                                                                                                                                        |                                                                                                                                                                                                       |     |
|-----|------------------------|--------------------------------------------------------------------------|-------------------------------------------------------------------------------|------------------------------------------------------------------|----------------------------------------------------------------------------------------------------------------------------------------|-------------------------------------------------------------------------------------------------------------------------------------------------------------------------------------------------------|-----|
| 88. | Rohda 2017             | United States<br>Legal regulation of cannabis for recreational use (RCL) | Repeated cross-sectional study, 2011-2016                                     | Population-based;<br>Admin record data<br><br>N=29,044 exposures | <i>Overdose or poisoning, other drugs</i> : synthetic cannabinoid receptor agonist (SCRA) exposures reported to poison control centers | SCRA exposures declined in WA (175 to 28, $p=0.017$ ) and OR (39 to 14, $p=0.012$ ) following RCL, but not in all RCL states combined ( $p=0.41$ ).                                                   | A * |
| 89. | Rusby 2018             | United States<br>Legal regulation of cannabis for recreational use (RCL) | Cohort study, 2014-2016                                                       | Population-based;<br>School-based survey<br><br>N=444            | <i>Prevalence of use, decriminalized/regulated drug(s)</i> : past 30-day use                                                           | RCL not significantly associated with use.                                                                                                                                                            | 12  |
|     |                        |                                                                          |                                                                               |                                                                  | <i>Frequency of use, decriminalized/regulated drug(s)</i> : number of days use in past 30                                              | RCL associated with greater number of days of use (ARR=1.26, 95% CI: 1.10, 1.45).                                                                                                                     |     |
|     |                        |                                                                          |                                                                               |                                                                  | <i>Attitudes towards use, decriminalized/regulated drug(s)</i> : willingness and intention to use (any vs. none)                       | RCL not significantly associated with willingness or intention to use.                                                                                                                                |     |
| 90. | Sabia 2017             | United States<br>Legal regulation of cannabis for medical use (MCL)      | Controlled before-and-after study. 1990-2012<br><br>[State-years without MML] | Population-based;<br>Household survey<br><br>N=5,428,399         | <i>BMI</i>                                                                                                                             | MCL associated with reduction in BMI (adjusted difference-in-differences for contemporaneous effect = -0.084, SE=0.034, $p<0.05$ ).                                                                   | 16  |
| 91. | Santaella-Tenorio 2017 | United States<br>Legal regulation of cannabis for medical use (MCL)      | Repeated cross-sectional study, 1985-2014                                     | Population-based;<br>Admin record data<br><br>N=1,220,610 deaths | <i>Accidents, motor vehicle</i> : age-adjusted traffic fatality rates (all road users)                                                 | MCL associated with 10.8% reduction in traffic fatality rates (95% CI = 9.0%, 12.5%).                                                                                                                 | 17  |
| 92. | Schmidt 2016           | United States<br>Legal regulation of cannabis for medical use            | Repeated cross-sectional study, 2014-2013                                     | Population-based;<br>Household survey                            | <i>Perceived harmfulness of decriminalized/regulated drug(s)</i> : belief that weekly/monthly use is "not a great risk"                | Living in MCL state not associated with perceived harmfulness. (Secular trend towards greater permissiveness for all outcomes, but no significant effects MCL after control for state fixed effects). | 17  |

|     |              |                                                                         |                                                                               |                                                                       |                                                                                                                                 |                                                                                                                                                                                             |    |
|-----|--------------|-------------------------------------------------------------------------|-------------------------------------------------------------------------------|-----------------------------------------------------------------------|---------------------------------------------------------------------------------------------------------------------------------|---------------------------------------------------------------------------------------------------------------------------------------------------------------------------------------------|----|
|     |              | (MCL)                                                                   |                                                                               | N=450,300                                                             | <i>Attitudes towards use, decriminalized/regulated drug(s):</i> belief that parents/friends don't disapprove of trying cannabis | Living in MCL state not associated with perceived attitudes.                                                                                                                                |    |
|     |              |                                                                         |                                                                               |                                                                       | <i>Perceived availability of decriminalized/regulated drug(s):</i> belief that cannabis is fairly or very easy to obtain        | Living in MCL state not associated with perceived availability.                                                                                                                             |    |
| 93. | Sevigny 2014 | United States<br><br>Legal regulation of cannabis for medical use (MCL) | Controlled before-and-after study, 1990-2010<br><br>[State-years without MCL] | Convenience sampling<br><br>N=39,157                                  | <i>Potency of decriminalized/regulated drug(s):</i> concentration of THC in cannabis seized by law enforcement                  | MCL not significantly associated with potency (adjusted difference in %THC=0.53, $p>0.05$ ), but legal dispensaries associated with higher potency.                                         | 16 |
| 94. | Shah 2018    | United States<br><br>Legal regulation of cannabis for medical use (MCL) | Repeated cross-sectional study, 2006-2014                                     | Population-based;<br>Admin record data                                | <i>Prescription drug use:</i> opioid use among commercially insured population.                                                 | MCL associated with lower odds of any opioid use (AOR=0.95, 95% CI: 0.94, 0.96), chronic opioid use (AOR=0.93, 95% CI: 0.91, 0.95) and high-risk opioid use (AOR=0.98, 95% CI: 0.96, 0.99). | A* |
| 95. | Shepard 2016 | United States<br><br>Legal regulation of cannabis for medical use (MCL) | Repeated cross-sectional study, 1997-2009                                     | Population-based;<br>Admin record data                                | <i>Crime (non-drug):</i> property crime (burglary, larceny, and vehicle theft arrests per 1000 residents)                       | MCL not associated with property crime.                                                                                                                                                     | 12 |
|     |              |                                                                         |                                                                               |                                                                       | <i>Crime (non-drug):</i> violent crime (assault, homicide, rape, and robbery arrests)                                           | MCL associated with reduction in violent crimes (-0.254 crimes per 1000 residents, SE=0.089, $p<0.05$ ).                                                                                    |    |
| 96. | Shi 2017     | United States<br><br>Legal regulation of cannabis for medical use (MCL) | Repeated cross-sectional study, 1997-2014                                     | Population-based;<br>Admin record data<br><br>N= 0.4M to 2.2M records | <i>Health services utilization:</i> annual hospitalization rate for cannabis dependence or abuse (ICD-9)                        | MCL not significantly associated with hospitalizations.                                                                                                                                     | 16 |
|     |              |                                                                         |                                                                               |                                                                       | <i>Overdose or poisoning, other drugs:</i> hospitalization rate for opioid pain reliever overdose                               | MCL associated with reduction in hospitalizations related to opioid overdose (adjusted prevalence difference = -0.13, 95% CI: -0.25, -0.018).                                               |    |



|      |                  |                                                                          |                                                                                       |                                                    |                                                                                                                                      |                                                                                                                                                 |    |
|------|------------------|--------------------------------------------------------------------------|---------------------------------------------------------------------------------------|----------------------------------------------------|--------------------------------------------------------------------------------------------------------------------------------------|-------------------------------------------------------------------------------------------------------------------------------------------------|----|
|      |                  |                                                                          |                                                                                       |                                                    | <i>Health services utilization:</i> hospitalization rate for opioid dependence or abuse                                              | MCL associated with reduction in hospitalizations related to opioid dependence (adjusted prevalence difference = -0.23, 95% CI: -0.41, -0.068). |    |
| 97.  | Sokoya 2018      | United States<br>Legal regulation of cannabis for recreational use (RCL) | Repeated cross-sectional study, 2012-2015                                             | Convenience sampling<br>N=2164                     | <i>Accidents, other:</i> types of bony facial trauma among patients presenting to two CO hospitals                                   | RCL not associated with significant difference in mechanisms of facial fracture.                                                                | 12 |
| 98.  | Steinemann 2018  | United States<br>Legal regulation of cannabis for medical use (MCL)      | Repeated cross-sectional study, 1993-2000; 2001-2015                                  | Population-based;<br>Admin record data<br>N=1578   | <i>Impaired driving, decriminalized/regulated drug(s):</i> proportion of fatally injured drivers who were cannabis-positive in HI    | MCL associated with increase in THC positivity (5.5% in 1993-2000; 16.3% in 2011-2015, $p<0.001$ ).                                             | 12 |
|      |                  |                                                                          |                                                                                       |                                                    | <i>Impaired driving, other drugs or alcohol:</i> proportion of fatally injured drivers who were methamphetamine- or alcohol-positive | MCL not associated with significant difference in positivity rates.                                                                             |    |
| 99.  | Stolzenberg 2016 | United States<br>Legal regulation of cannabis for medical use (MCL)      | Repeated cross-sectional study, 2002-2003; 2004-2005; 2006-2007; 2008-2009; 2010-2011 | Population-based;<br>School-based survey           | <i>Prevalence of use, decriminalized/regulated drug(s):</i> past-month use among adolescents                                         | Living in MCL state associated with greater use (adjusted coefficient=0.861, SE=0.298, $p<0.01$ ).                                              | 14 |
|      |                  |                                                                          |                                                                                       |                                                    | <i>Prevalence of use, other drugs or alcohol:</i> past-month non-cannabis illicit drug use                                           | No significant association between living in MCL state and use.                                                                                 |    |
| 100. | Straub 2017      | United States<br>Legal regulation of cannabis for recreational use (RCL) | Repeated cross-sectional study, 2011-2012; 2012-2014; 2014-2016                       | Population-based;<br>Admin record data<br>N=25,763 | <i>Prevalence of use, decriminalized/regulated drug(s):</i> positive urine screen or documented use during pregnancy                 | No significant change in cannabis-positivity post-RCL.                                                                                          | A* |
| 101. | Suggs 1981       | United States<br>Cannabis decriminalization                              | Uncontrolled before-and-after study, 1977-1979                                        | Population-based;<br>Admin record data             | <i>Criminal justice involvement:</i> possession arrests and citations for adults and minors in two NE cities                         | No significant difference in mean monthly arrests following decriminalization.                                                                  | 12 |

|      |             |                                                                              |                                                                               |                                                        |                                                                                                                                                                |                                                                                                                                                                                        |    |
|------|-------------|------------------------------------------------------------------------------|-------------------------------------------------------------------------------|--------------------------------------------------------|----------------------------------------------------------------------------------------------------------------------------------------------------------------|----------------------------------------------------------------------------------------------------------------------------------------------------------------------------------------|----|
|      |             | n                                                                            |                                                                               | N=719                                                  | <i>Criminal justice involvement:</i> possession prosecutions for adults and minors                                                                             | Significant increase in prosecutions following decriminalization among minors (from mean of 1.92 to 5.75/month, $p<0.05$ ), but not adults (26.71 to 36.25, $p>0.05$ ).                |    |
|      |             |                                                                              |                                                                               |                                                        | <i>Criminal justice involvement:</i> defendants representing themselves                                                                                        | Significant increase following decriminalization (from 18.07 to 30.75/month, $p<0.05$ ).                                                                                               |    |
|      |             |                                                                              |                                                                               |                                                        | <i>Criminal justice involvement:</i> case dismissal before trial                                                                                               | Significant decrease following decriminalization (from 9.14 to 2.37/month, $p<0.001$ ).                                                                                                |    |
| 102. | Ullman 2017 | United States<br><br>Legal regulation of cannabis for medical use (MCL)      | Controlled before-and-after study, 1992-2012<br><br>[State-years without MCL] | Population-based;<br>Household survey<br><br>N=757,677 | <i>Workplace absence:</i> self-reported absence for medical reasons in the past week                                                                           | MCL associated with lower probability of absence ( $b= -0.0013$ , $SE=0.0007$ , $p<0.10$ ), with effects concentrated in loosely regulated MCL states, men and people aged 30-49.      | 16 |
| 103. | Urfer 2014  | United States<br><br>Legal regulation of cannabis for recreational use (RCL) | Repeated cross-sectional study, 2011-2014                                     | Convenience sampling<br><br>N=12,082                   | <i>Impaired driving, decriminalized/regulated drug(s):</i> Proportion of THC-positive blood samples collected from CO drivers                                  | Increase in THC-positive screens from 2011 (28%) to 2012 (59%) to 2013 (65%), $p=0.001$ . No significant change in first two months of legal cannabis sales.                           | 11 |
| 104. | Wagner 2016 | United States<br><br>Legal regulation of cannabis for recreational use (RCL) | Repeated cross-sectional study, 2012-2015                                     | Convenience sampling<br><br>N=34                       | <i>Physical health consequences of use, decriminalized/regulated drug(s):</i> Reversible Cerebral Vasoconstriction Syndrome (RCVS) cases secondary to cannabis | Of 18 RCVS cases before RCL, 1 patient used cannabis. Of 16 cases after RCL, 5 used cannabis. No statistical tests reported.                                                           | A* |
| 105. | Wall 2016   | United States<br><br>Legal regulation of cannabis for medical use (MCL)      | Repeated cross-sectional study, 2002-2010                                     | Population-based;<br>Household survey                  | <i>Prevalence of use, decriminalized/regulated drug(s):</i> past-month use among adolescents                                                                   | *Reanalysis of Stolzenberg 2016 (#99)<br><br>After appropriate adjustment for pre-MCL prevalence, MCL not associated with adolescent use ( $b = 0.33\%$ ; $SE= 0.29\%$ , $p = 0.25$ ). | 18 |

|      |           |                                                                                            |                                           |                                                           |                                                                                                                                                                                                                                                                                                                              |                                                                                                                                                                                                                                                                                                                                                                                                                                                                                   |    |
|------|-----------|--------------------------------------------------------------------------------------------|-------------------------------------------|-----------------------------------------------------------|------------------------------------------------------------------------------------------------------------------------------------------------------------------------------------------------------------------------------------------------------------------------------------------------------------------------------|-----------------------------------------------------------------------------------------------------------------------------------------------------------------------------------------------------------------------------------------------------------------------------------------------------------------------------------------------------------------------------------------------------------------------------------------------------------------------------------|----|
| 106. | Wall 2011 | United States<br>Legal regulation of cannabis for medical use (MCL)                        | Repeated cross-sectional study, 2002-2008 | Population-based;<br>Household survey<br><br>N=23,300     | <i>Prevalence of use, decriminalized/regulated drug(s):</i> past-month use among adolescents<br><br><i>Perceived harmfulness of decriminalized/regulated drug(s):</i> perceived “great risk” of using monthly or more                                                                                                        | Use was significantly higher in MCL states (average of 8.7% vs. 6.9%) but among states that passed MCL from 2004-2008, baseline use (pre-MCL) was already higher than in non-MCL states.<br><br>Perceived harmfulness was significantly lower in MCL states each year (average of 8.7% vs. 6.9%), but among states that passed MCL, baseline perceived risk (pre-MCL) was already lower than non-MCL states.                                                                      | 13 |
| 107. | Wang 2018 | United States<br>Legal regulation of cannabis for recreational use (RCL)                   | Repeated cross-sectional study, 2005-2015 | Population-based;<br>Admin record data<br><br>N=4202      | <i>Health services utilization:</i> emergency or urgent care visits with a cannabis-related discharge code or THC-positive urine toxicology among adolescents                                                                                                                                                                | Cannabis-related visits increased from 1.8 per 1000 visits in 2009 to 4.9 per 1000 in 2015, following RCL ( $p<0.0001$ ).                                                                                                                                                                                                                                                                                                                                                         | 11 |
| 108. | Wang 2017 | United States<br>Legal regulation of cannabis for medical (MCL) and recreational use (RCL) | Repeated cross-sectional study, 2000-2015 | Population-based;<br>Admin record data<br><br>N=7,432,254 | <i>Health services utilization:</i> hospitalizations with cannabis-related billing codes<br><br><i>Health services utilization:</i> emergency department visits with cannabis-related billing codes<br><br><i>Overdose or poisoning, decriminalized/regulated drug:</i> cannabis exposure calls to CO poison control centers | Hospitalizations increased from 274 per 100,000 in 2000 (prior to MCL) to 593 in 2015 (after RCL). Statistically significant 25% increase in 2014 (RCL implementation with legal sales).<br><br>ED visits increased from 313 per 100,000 in 2011 to 478 in 2015, with highest rate in 2014 (554). Statistically significant increase in 2014 ( $p=0.0005$ ).<br><br>Poison control calls increased by 79.9% following RCL implementation in 2014, from 123 to 221 ( $p=0.0001$ ). | 14 |
| 109. | Wang 2016 | United States<br>Legal regulation of cannabis for recreational use (RCL)                   | Repeated cross-sectional study, 2009-2015 | Population-based;<br>Admin record data<br><br>N=62        | <i>Overdose or poisoning, decriminalized/regulated drug:</i> children’s hospital visits related to cannabis exposure<br><br><i>Overdose or poisoning, decriminalized/regulated drug:</i> poison control calls related to cannabis exposure among children 0-9                                                                | RCL associated with increased cannabis-related visits (1.2 per 100,000 in 2012-2013 to 2.3 per 100,000 in 2014-2015, $p=0.02$ ).<br><br>RCL associated with increased cannabis-related calls in CO (2.7 per 100,000 in 2012-2013 to 5.3 per 100,000 in 2014-2015, $p<0.001$ ) and in comparison to rest                                                                                                                                                                           | 13 |

|      |          |                                                                                                |                                                                                                       |                                                                                 |                                                                                                                                                                                                                                                                               |                                                                                                                                                                                                                                                 |    |
|------|----------|------------------------------------------------------------------------------------------------|-------------------------------------------------------------------------------------------------------|---------------------------------------------------------------------------------|-------------------------------------------------------------------------------------------------------------------------------------------------------------------------------------------------------------------------------------------------------------------------------|-------------------------------------------------------------------------------------------------------------------------------------------------------------------------------------------------------------------------------------------------|----|
|      |          |                                                                                                |                                                                                                       |                                                                                 |                                                                                                                                                                                                                                                                               | of the US (34% increase in CO vs. 19% increase in remainder of US, $p=0.04$ ).                                                                                                                                                                  |    |
| 110. | Wen 2018 | United States<br><br>Legal regulation of cannabis for medical (MCL) and recreational use (RCL) | Controlled before-and-after study, 2011-2016<br><br>[States without MCL or RCL over the study period] | Population-based;<br>Admin record data<br><br>N=1059 state-quarter observations | <i>Prescription drug use</i> : number of opioid prescriptions covered by Medicaid on a quarterly, per-1000-Medicaid-enrollee basis in each state                                                                                                                              | MCL and RCL associated with reductions in prescriptions of 5.88% (95% CI: -11.55%, -0.21%) and 6.38% (95% CI: -12.20, -0.56%) respectively.                                                                                                     | 17 |
| 111. | Wen 2015 | United States<br><br>Legal regulation of cannabis for medical use (MCL)                        | Repeated cross-sectional study, 2004-2012                                                             | Population-based;<br>Household survey<br><br>N=593,400                          | <i>Prevalence of use, decriminalized/regulated drug(s)</i> : past-month use; past-year initiation                                                                                                                                                                             | MCL associated with increase in past-month use among adults 21+ (+1.32%, $p<0.05$ ) but not ages 12-20. MCL associated with increased risk of past-year initiation among ages 12-20 only (+0.32%, $p<0.05$ ).                                   | 17 |
|      |          |                                                                                                |                                                                                                       |                                                                                 | <i>Frequency of use, decriminalized/regulated drug(s)</i> : daily/almost daily use (>20 days in month); # of days among past-month users                                                                                                                                      | MCL associated with increase in (almost) daily use among adults 21+ (+0.58%, $p<0.05$ ) but not ages 12-20.                                                                                                                                     |    |
|      |          |                                                                                                |                                                                                                       |                                                                                 | <i>Prevalence of use, other drugs or alcohol</i> : # of drinks in past month; # of binge drinking days; met DSM-IV alcohol use disorder criteria in past year; both cannabis use and binge drinking in past month; use of cannabis and alcohol on same occasion in past month | MCL associated with frequency of binge drinking (+0.16 days, $p<0.05$ ) and past-month use of both cannabis and alcohol (+1.44%, $p<0.01$ ) among adults 21+. No associations with alcohol use among ages 12-20, or with alcohol use disorders. |    |
|      |          |                                                                                                |                                                                                                       |                                                                                 | <i>Prevalence of use, other drugs or alcohol</i> ; past-year use of non-medical prescription painkillers, heroin, cocaine                                                                                                                                                     | No immediate or lagged associations between MCL and illicit drug use in either age group.                                                                                                                                                       |    |
|      |          |                                                                                                |                                                                                                       |                                                                                 | <i>Substance use disorder or diagnosed dependence</i> : met DSM-IV cannabis use disorder criteria in past year                                                                                                                                                                | Lagged associations between MCL and cannabis use disorder among adults 21+ (+0.25% at 1 year, $p<0.05$ ) but not among ages 12-20.                                                                                                              |    |

|      |               |                                                                         |                                                                                                            |                                                     |                                                                                                                                                                                                                                                                                                                                                                                                                                         |                                                                                                                                                                                                                                                                                                                                                                                                                                               |    |
|------|---------------|-------------------------------------------------------------------------|------------------------------------------------------------------------------------------------------------|-----------------------------------------------------|-----------------------------------------------------------------------------------------------------------------------------------------------------------------------------------------------------------------------------------------------------------------------------------------------------------------------------------------------------------------------------------------------------------------------------------------|-----------------------------------------------------------------------------------------------------------------------------------------------------------------------------------------------------------------------------------------------------------------------------------------------------------------------------------------------------------------------------------------------------------------------------------------------|----|
| 112. | Wen 2019      | United States<br><br>Legal regulation of cannabis for medical use (MCL) | Controlled before-and-after study, 2004-2012<br><br>[Non-MCL states]                                       | Population-based; Household survey<br><br>N=388,200 | <i>Perceived availability of decriminalized/regulated drug(s)</i> : (very) easy to obtain, among adolescents and young adults<br><br><i>Attitudes towards use, decriminalized/regulated drug(s)</i> : acceptance of use by other adolescents/young adults; perceived parental acceptance (ages 12-17 only)<br><br><i>Perceived harmfulness of decriminalized/regulated drug(s)</i> : no/low health risk of using once or twice per week | No significant association between MCL and perceived availability among ages 12-17 or 18-25.<br><br>MCL significantly associated with lower perceived parental acceptance among ages 12-17 (-0.37%, 95% CI: -0.72, -0.03).<br><br>MCL significantly associated with higher perceived harmlessness among ages 18-25 only (+4.72%, 95% CI: 0.15, 9.28).                                                                                         | 16 |
| 113. | Williams 2017 | United States<br><br>Legal regulation of cannabis for medical use (MCL) | Controlled before-and-after study, 2004-2013<br><br>[State-years without MCL]                              | Population-based; Household survey                  | <i>Prevalence of use, decriminalized/regulated drug(s)</i> : past-month use<br><br><i>Frequency of use, decriminalized/legalized drug(s)</i> : heavy use in past year (>300 days), among past-year users<br><br><i>Substance use disorder or diagnosed dependence met DSM-IV criteria for cannabis use disorder</i>                                                                                                                     | Only loosely regulated MCL associated with higher use, among adults 26+ only (adjusted prevalence difference = +1.46%, 95% CI: 0.33, 2.58).<br><br>Tightly regulated MCL associated with less heavy use, among ages 12-17 only (adjusted prevalence difference = -3.67%, 95% CI: -7.24, -0.11).<br><br>Loosely regulated MCL associated with lower prevalence of cannabis use disorder, among ages 18-25 only (-0.80%, 95% CI: -1.45, -0.16). | 15 |
| 114. | Williams 2014 | Australia<br><br>Cannabis decriminalization                             | Controlled before-and-after study, 1998;2001;2004;2007;2010<br><br>[state-years without decriminalization] | Population-based; Household survey<br><br>N=39,087  | <i>Age of first use, decriminalized/regulated drug(s)</i> : age at initiation                                                                                                                                                                                                                                                                                                                                                           | Decriminalization not associated with hazard of cannabis uptake overall but interacts with age such that minors under decriminalization have a 12% higher hazard rate of uptake while adults under decriminalization have an 11% lower hazard rate of uptake ( $p < 0.01$ ).                                                                                                                                                                  | 18 |

\*A = abstract; no quality appraisal performed.

For peer review only

1  
2  
3  
4  
5  
6  
7  
8  
9  
10  
11  
12  
13  
14  
15  
16  
17  
18  
19  
20  
21  
22  
23  
24  
25  
26  
27  
28  
29  
30  
31  
32  
33  
34  
35  
36  
37  
38  
39  
40  
41  
42  
43  
44  
45  
46  
47

Supplementary Table 2. Direction of effect of decriminalization or legal regulation, by outcome category

| Outcomes                                                     | Number of outcomes | # reporting beneficial effects | # reporting harmful effects | # reporting mixed effects | # reporting no effect | Article # (See Included Studies)                                |
|--------------------------------------------------------------|--------------------|--------------------------------|-----------------------------|---------------------------|-----------------------|-----------------------------------------------------------------|
| Accidents, motor vehicle                                     | 4                  | 1                              | 1                           | 1                         | 1                     | 3, 8, 43, 91                                                    |
| Accidents, other                                             | 4                  | 0                              | 2                           | 1                         | 1                     | 5, 11, 14, 97                                                   |
| Addiction treatment utilization                              | 4                  | 0                              | 1                           | 1                         | 2                     | 1, 25, 78, 83                                                   |
| Age of first use, decriminalized/regulated drug              | 3                  | 0                              | 0                           | 1                         | 2                     | 23, 84, 114                                                     |
| Attitudes towards use, decriminalized/regulated drug         | 6                  | 0                              | 1                           | 3                         | 2                     | 27, 71, 89, 92, 112                                             |
| Availability of decriminalized/regulated drug                | 3                  | 0                              | 0                           | 1                         | 2                     | 6, 31, 86                                                       |
| BMI                                                          | 1                  | 1                              | 0                           | 0                         | 0                     | 90                                                              |
| Costs, health care                                           | 3                  | 2                              | 1                           | 0                         | 0                     | 15, 17, 33                                                      |
| Costs, other                                                 | 3                  | 3                              | 0                           | 0                         | 0                     | 33                                                              |
| Crime (non-drug)                                             | 9                  | 5                              | 0                           | 0                         | 4                     | 7, 44, 74, 95                                                   |
| Criminal justice involvement                                 | 8                  | 1                              | 3                           | 1                         | 3                     | 7, 25, 36, 101                                                  |
| Disclosure of use to healthcare provider                     | 1                  | 1                              | 0                           | 0                         | 0                     | 87                                                              |
| Educational outcomes                                         | 3                  | 0                              | 2                           | 1                         | 0                     | 81                                                              |
| Frequency of use, decriminalized/regulated drug              | 16                 | 1                              | 3                           | 4                         | 8                     | 6, 18, 30, 36, 46, 47, 59, 60, 64, 69, 72, 78, 81, 89, 111, 113 |
| Health services utilization (excluding addictions treatment) | 12                 | 2                              | 6                           | 1                         | 3                     | 13, 19, 34, 54, 55, 73, 96, 107, 108                            |
| Impaired driving, decriminalized/regulated drug              | 8                  | 0                              | 5                           | 1                         | 2                     | 26, 42, 67, 82, 85, 98, 103                                     |
| Impaired driving, other drug/alcohol                         | 3                  | 0                              | 0                           | 1                         | 2                     | 42, 58, 98                                                      |
| Mental health conditions, suicide, or self-harm              | 4                  | 0                              | 1                           | 2                         | 1                     | 4, 29, 30, 37                                                   |



| <b>Outcomes</b>                                                                            | <b>Number of outcomes</b> | <b># reporting beneficial effects</b> | <b># reporting harmful effects</b> | <b># reporting mixed effects</b> | <b># reporting no effect</b> | <b>Article # (See Included Studies)</b>                                                                                                                                              |
|--------------------------------------------------------------------------------------------|---------------------------|---------------------------------------|------------------------------------|----------------------------------|------------------------------|--------------------------------------------------------------------------------------------------------------------------------------------------------------------------------------|
| <b>Mode of use, decriminalized/regulated drug</b>                                          | 1                         | 0                                     | 0                                  | 0                                | 1                            | 39                                                                                                                                                                                   |
| <b>Opioid therapy compliance</b>                                                           | 1                         | 0                                     | 0                                  | 0                                | 1                            | 63                                                                                                                                                                                   |
| <b>Overdose or poisoning (incl. unintentional exposures) decriminalized/regulated drug</b> | 7                         | 0                                     | 7                                  | 0                                | 0                            | 10, 12, 75, 76, 108, 109                                                                                                                                                             |
| <b>Overdose or poisoning, other drugs</b>                                                  | 7                         | 4                                     | 0                                  | 2                                | 1                            | 9, 10, 62, 80, 83, 88, 96                                                                                                                                                            |
| <b>Perceived availability, decriminalized/regulated drug</b>                               | 8                         | 0                                     | 1                                  | 2                                | 5                            | 27, 39, 53, 60, 65, 71, 92, 112                                                                                                                                                      |
| <b>Perceived harmfulness, decriminalized/regulated drug</b>                                | 12                        | 1                                     | 2                                  | 6                                | 3                            | 18, 22, 30, 38, 39, 52, 59, 60, 71, 92, 106, 112                                                                                                                                     |
| <b>Physical health consequences of use, decriminalized/regulated drug</b>                  | 1                         | 0                                     | 0                                  | 0                                | 1                            | 104                                                                                                                                                                                  |
| <b>Potency, decriminalized/regulated drug</b>                                              | 1                         | 0                                     | 0                                  | 0                                | 1                            | 93                                                                                                                                                                                   |
| <b>Prescription drug use (medical use)</b>                                                 | 9                         | 6                                     | 0                                  | 1                                | 2                            | 15, 16, 17, 56, 61, 83, 94, 110                                                                                                                                                      |
| <b>Prevalence of use, decriminalized/regulated drug</b>                                    | 50                        | 2                                     | 13                                 | 11                               | 24                           | 1, 2, 6, 18, 20, 21, 22, 24, 27, 28, 34, 35, 36, 38, 39, 40, 41, 46, 48, 49, 50, 51, 52, 53, 63, 64, 65, 66, 68, 69, 70, 71, 72, 78, 79, 81, 84, 87, 89, 99, 100, 105, 106, 111, 113 |

1  
2  
3  
4  
5  
6  
7  
8  
9  
10  
11  
12  
13  
14  
15  
16  
17  
18  
19  
20  
21  
22  
23  
24  
25  
26  
27  
28  
29  
30  
31  
32  
33  
34  
35  
36  
37  
38  
39  
40  
41  
42  
43  
44  
45  
46  
47

| <b>Outcomes</b>                                            | <b>Number of outcomes</b> | <b># reporting beneficial effects</b> | <b># reporting harmful effects</b> | <b># reporting mixed effects</b> | <b># reporting no effect</b> | <b>Article # (See Included Studies)</b>                 |
|------------------------------------------------------------|---------------------------|---------------------------------------|------------------------------------|----------------------------------|------------------------------|---------------------------------------------------------|
| <b>Prevalence or frequency of use, other drugs/alcohol</b> | 21                        | 2                                     | 2                                  | 6                                | 11                           | 18, 21, 35, 47, 49, 50, 53, 57, 60, 66, 72, 83, 99, 111 |
| <b>Price of drugs</b>                                      | 5                         | 0                                     | 1                                  | 1                                | 3                            | 3, 31, 32, 45, 77                                       |
| <b>Substance use disorder or diagnosed dependence</b>      | 5                         | 0                                     | 1                                  | 2                                | 2                            | 40, 59, 69, 111, 113                                    |
| <b>Workplace absence</b>                                   | 1                         | 1                                     | 0                                  | 0                                | 0                            | 102                                                     |

For peer review only

## Appendix A: Search Strategy and Results

Database: Ovid MEDLINE: Epub Ahead of Print, In-Process & Other Non-Indexed Citations,  
Ovid MEDLINE® Daily and Ovid MEDLINE® <1946-Present>  
Search Strategy:

-----

- 1 ((Marijuana or marihuana or cannabis or cannabinoid\* or psychoactive product\* or psychoactive substances\* or narcotic\*) adj5 (Legaliz\* or legalis\* or decriminal\* or depenaliz\* or depenalis\* or deregulat\* or liberaliz\* or liberalis\*)).tw,kf.
- 2 ((marijuana or marihuana or cannabis or cannabinoid\*) adj1 (policy or policies or law or laws or licens\* or legislation or dispensar\* or store or stores or regulat\* or recreational or medical or medicinal or nonmedical or legal\*)).tw,kf.
- 3 (legal high or legal highs).tw,kf.
- 4 Psychoactive Substances Act.tw,kf.
- 5 2 or 3 or 4
- 6 new psychoactive product\*.tw,kf.
- 7 novel psychoactive product\*.tw,kf.
- 8 novel psychoactive substance\*.tw,kf.
- 9 new psychoactive substance\*.tw,kf.
- 10 novel psychoactive drug\*.tw,kf.
- 11 new psychoactive substances\*.tw,kf.
- 12 Designer Drugs/sd [Supply & Distribution]
- 13 Medical Marijuana/sd [Supply & Distribution]
- 14 exp Street Drugs/lj, sd [Legislation & Jurisprudence, Supply & Distribution]
- 15 Marijuana Smoking/lj [Legislation & Jurisprudence]
- 16 Drug Users/lj, sn [Legislation & Jurisprudence, Statistics & Numerical Data]
- 17 "Drug and Narcotic Control"/lj [Legislation & Jurisprudence]
- 18 or/6-17
- 19 (Legal\* or decriminal\* or depenaliz\* or depenalis\* or deregulat\* or liberaliz\* or liberalis\* or policy or policies or law or laws or licens\* or legislation or regulat\*).ti.
- 20 18 and 19
- 21 5 or 20
- 22 limit 21 to (clinical study or clinical trial, all or comparative study or evaluation studies or meta analysis or multicenter study or observational study or pragmatic clinical trial or systematic reviews or validation studies)
- 23 Epidemiologic studies/
- 24 exp case control studies/
- 25 exp cohort studies/
- 26 Case control.tw.
- 27 (cohort adj (study or studies)).tw.
- 28 Cohort analy\$.tw.
- 29 (Follow up adj (study or studies)).tw.
- 30 (observational adj (study or studies)).tw.
- 31 Longitudinal.tw.
- 32 Retrospective.tw.
- 33 Cross sectional.tw.
- 34 Cross-sectional studies/

## Appendix A: Search Strategy and Results

35 or/23-34 [ Observational Studies search filter used by SIGN (Scottish Intercollegiate  
 Guidelines Network <http://www.sign.ac.uk/methodology/filters.html#obs> ]  
 36 21 and 35  
 37 exp Epidemiologic Methods/  
 38 amphetamine-related disorders/ep or cocaine-related disorders/ep or drug overdose/ep or  
 9 inhalant abuse/ep or marijuana abuse/ep or exp opioid-related disorders/ep or phencyclidine  
 10 abuse/ep or psychoses, substance-induced/ep or substance abuse, intravenous/ep  
 11 Prevalence/  
 12 Incidence/ or incidence.ti,ab,kw.  
 13 (harm or harms).tw,kf.  
 14 ("marijuana use" or "marijuana availability" or "cannabis use" or cannabis availability or  
 15 "drug use").tw,kf.  
 16 or/37-42  
 17 21 and 43  
 18 1 or 22 or 36 or 44  
 19 45 not (exp animals/ not humans.sh.)  
 20 limit 46 to (comment or editorial or letter)  
 21 46 not 47  
 22 limit 48 to yr="1970 -Current"

| Database                                                                                                                                                                                              | Number of Results |
|-------------------------------------------------------------------------------------------------------------------------------------------------------------------------------------------------------|-------------------|
| Medline (OVID)                                                                                                                                                                                        | 2041              |
| Embase (OVID)                                                                                                                                                                                         | 1453              |
| PsycINFO (OVID)                                                                                                                                                                                       | 1393              |
| Web of Science:<br>Science Citation Index<br>Social Sciences Citation Index<br>Conference Proceedings Citation Index- Science<br>Conference Proceedings Citation Index- Social Science & Humanities   | 1358              |
| Criminal Justice Abstracts (EBSCO)                                                                                                                                                                    | 1074              |
| ProQuest Databases:<br>Applied Social Sciences Index & Abstracts (ASSIA),<br>International Bibliography of the Social Sciences (IBSS),<br>PAIS Index,<br>Policy File Index,<br>Sociological Abstracts | 910               |
| Total Number of Results                                                                                                                                                                               | <b>8229</b>       |
| Total number of results after duplicates removed in EndNote                                                                                                                                           | <b>4860</b>       |

## Appendix B: Quality Appraisal Checklist

**Adapted from:** Downs SH, Black N. The feasibility of creating a checklist for the assessment of the methodological quality both of randomised and non-randomised studies of health care interventions. *J Epidemiol Community Health*. 1998;52(6):377-384.

1. Is the hypothesis/aim/objective of the study clearly described?

Yes (1)

No (0)

2. Are the main outcomes to be measured clearly described in the Introduction or Methods section? *If the main outcomes are first mentioned in the Results section, the question should be answered no.*

Yes (1)

No (0)

3. Are the characteristics of the individuals included in the study clearly described? In cohort studies and trials, inclusion and/or exclusion criteria should be given.

Yes (1)

No (0)

4. Are the interventions of interest clearly described?

Yes (1)

No (0)

5. Are the distributions of principal confounders in each group of subjects to be compared clearly described?

Yes (2)

Partially (1)

No (0)

6. Are the main findings of the study clearly described? *Simple outcome data (including denominators and numerators) should be reported for all major findings so that the reader can check the major analyses and conclusions. (This question does not cover statistical tests which are considered below).*

Yes (1)

No (0)

7. Does the study provide estimates of the random variability in the data for the main outcome (e.g., IQR, standard deviation, confidence interval, etc.)?

Yes (1)

No (0)

N/A [there is no variability because data come from the entire population] (1)

## Appendix B: Quality Appraisal Checklist

1  
2  
3 8. Have actual probability values been reported (e.g. 0.035 rather than  $<0.05$ ) for the main  
4 outcomes except where the probability value is less than 0.001? (*Confidence intervals are*  
5 *acceptable in place of p-values*)

6  Yes (1)

7  
8  No (0)

9  
10 9. Were the subjects that were asked to participate in the study representative of the entire  
11 population from which they were recruited? *The study must identify the source population for*  
12 *participants and describe how they were selected. Participants would be representative if they*  
13 *comprised the entire source population or a random sample. Random sampling is only feasible*  
14 *where a list of all members of the relevant population exists.*

15  Yes (1)

16  No (0)

17  Unable to determine (0)

18  
19 10. Were those subjects who agreed to participate representative of the entire population from  
20 which they were recruited? *The proportion of those asked who agreed should be stated.*  
21 *Validation that the sample was representative would include demonstrating that the distribution*  
22 *of the main confounding factors was the same in the study sample and the source population.*

23  Yes (1)

24  No (0)

25  Unable to determine (0)

26  
27 11. If any of the results of the study were based on “data dredging”, was this made clear?  
28 *Any analyses that had not been planned at the outset of the study should be clearly indicated. If*  
29 *no retrospective unplanned subgroup analyses were reported, then answer yes.*

30  Yes (1)

31  No (0)

32  Unable to determine (0)

33  
34 12. In trials and cohort studies, do the analyses adjust for different lengths of follow-up of  
35 participants, or in case-control studies, is the time period between the intervention and outcome  
36 the same for cases and controls? *Where follow-up was the same for all study participants the*  
37 *answer should be yes. If different lengths of follow-up were adjusted for by, for example, survival*  
38 *analysis the answer should be yes. Studies where differences in follow-up are ignored should be*  
39 *answered no.*

40  Yes or N/A (1)

41  No (0)

42  Unable to determine (0)

43  
44 13. Were the statistical tests used to assess the main outcomes appropriate? *The statistical*  
45 *techniques used must be appropriate to the data. For example non-parametric methods should*  
46 *be used for small sample sizes. Where little statistical analysis has been undertaken but where*  
47 *there is no evidence of bias, the question should be answered yes. If the distribution of the data*

## Appendix B: Quality Appraisal Checklist

(normal or not) is not described it must be assumed that the estimates used were appropriate and the question should be answered yes.

- Yes (1)
- No (0)
- Unable to determine from article (0)

14. Were the main outcome measures used accurate (valid and reliable)? *For studies where the outcome measures are clearly described, the question should be answered yes. For studies which refer to other work or that demonstrates the outcome measures are accurate, the question should be answered as yes.*

- Yes (1)
- No (0)
- Unable to determine (0)

15. Were the participants in different comparison groups recruited from the same population or from comparable populations? *Answer NO for studies without a comparison/control group.*

- Yes (1)
- No (0)
- Unable to determine (0)

16. Were study subjects in different intervention groups recruited over the same period of time? *Answer NO for studies without a comparison/control group.*

- Yes (1)
- No (0)
- Unable to determine (0)

17. Was there adequate adjustment for confounding in the analyses from which the main findings were drawn?

- Yes (1)
- No (0)
- Unable to determine (0)



## Appendix C: Included Studies

## INCLUDED STUDIES

1. Adam C, Raschzok A. Cannabis policy and the uptake of treatment for cannabis-related problems. *Drug Alcohol Rev.* 2017;36(2):171-177.
2. Allshouse AA, Metz TD. Trends in self-reported and urine toxicology (UTOX)-detected maternal marijuana use before and after legalization. *Am J Obstet Gynecol.* 2016;1:S444-S445.
3. Anderson DM, Hansen B, Rees DI. Medical marijuana laws, traffic fatalities, and alcohol consumption. *J Law Econ.* 2013;56(2):333-369.
4. Anderson DM, Rees DI, Sabia JJ. Medical marijuana laws and suicides by gender and age. *Am J Public Health.* 2014;104(12):2369-2376.
5. Anderson DM, Rees DI, Tekin E. Medical marijuana laws and workplace fatalities in the United States. *Int J Drug Policy.* 2018;60:33-39.
6. Anderson MD, Hansen B, Rees DI. Medical marijuana laws and teen marijuana use. *Am Law Econ Rev.* 2015;17(2):495-528.
7. Arredondo J, Gaines T, Manian S, et al. The law on the streets: evaluating the impact of Mexico's drug decriminalization reform on drug possession arrests in Tijuana, Mexico. *Int J Drug Policy.* 2018;54:1-8. doi:10.1016/j.drugpo.2017.12.006.
8. Aydelotte JD, Brown LH, Luftman KM, et al. Crash fatality rates after recreational marijuana legalization in Washington and Colorado. *Am J Public Health.* 2017;107(8):1329-1331.
9. Bachhuber MA, Saloner B, Cunningham CO, Barry CL. Medical cannabis laws and opioid analgesic overdose mortality in the United States, 1999-2010. *JAMA Intern Med.* 2014;174(10):1668-1673.
10. Banerji S, Hoyte C. Marijuana and synthetic cannabinoid patterns in a US state with legalized marijuana: a 5-year NPDS review. *Clin Toxicol.* 2017;55 (5):418-419.
11. Bell C, Slim J, Flaten HK, Lindberg G, Arek W, Monte AA. Butane hash oil burns associated with marijuana liberalization in Colorado. *J Med Toxicol.* 2015;11(4):422-425.
12. Bjordal M, Garrard A. The impact of marijuana legalization on poison center calls in the evergreen state. *Clin Toxicol.* 2015;53(7):694.
13. Blachly PH. Effects of decriminalization of marijuana in Oregon. *Ann N Y Acad Sci.* 1976;282:405-415.
14. Boyle C. Butane hash oil manufacturing related burn injury: a disturbing trend. *J Burn Care Res.* 2014;35:S112.
15. Bradford AC, Bradford WD. Medical marijuana laws reduce prescription medication use in Medicare Part D. *Health Aff.* 2016;35(7):1230-1236.
16. Bradford AC, Bradford WD, Abraham A, Bagwell Adams G. Association between US state medical cannabis laws and opioid prescribing in the Medicare Part D population. *JAMA Intern Med.* 2018;178(5):667-672.
17. Bradford AC, Bradford WD. Medical marijuana laws may be associated with a decline in the number of prescriptions for Medicaid enrollees. *Health Aff.* 2017;36(5):945-951.
18. Brooks-Russell A, Ma M, Levinson AH, et al. Adolescent marijuana use, marijuana-related perceptions, and use of other substances before and after initiation of retail marijuana sales in Colorado (2013-2015). *Prev Sci.* 2019;20(2):185-193.
19. Calcaterra SL, Keniston A, Hull ML. The impact of the legalization of recreational marijuana on a safety-net health system. *J Gen Intern Med.* 2018;33(S2):S361.

## Appendix C: Included Studies

20. Cassidy TA, Green T, Garg P, Butler SF. Up in smoke? Marijuana initiation and prevalence trends in Colorado: 2008 to 2014. *Drug Alcohol Depend.* 2015;156:e39.
21. Cerda M, Sarvet AL, Wall M, et al. Medical marijuana laws and adolescent use of marijuana and other substances: alcohol, cigarettes, prescription drugs, and other illicit drugs. *Drug Alcohol Depend.* 2018;183:62-68.
22. Cerda M, Wall M, Feng T, et al. Association of state recreational marijuana laws with adolescent marijuana use. *JAMA Pediatr.* 2017;171(2):142-149.
23. Cervený J, Chomynova P, Mravčík V, van Ours JC. Cannabis decriminalization and the age of onset of cannabis use. *Int J Drug Policy.* 2017;43:122-129.
24. Choo EK, Benz M, Zaller N, Warren O, Rising KL, McConnell KJ. The impact of state medical marijuana legislation on adolescent marijuana use. *J Adolesc Health.* 2014;55(2):160-166.
25. Chu YW. The effects of medical marijuana laws on illegal marijuana use. *J Health Econ.* 2014;38:43-61.
26. Couper FJ, Peterson BL. The prevalence of marijuana in suspected impaired driving cases in Washington state. *J Anal Toxicol.* 2014;38(8):569-574.
27. Donnelly N, Hall W, Christie P. The effects of partial decriminalisation on cannabis use in South Australia, 1985 to 1993. *Aust J Public Health.* 1995;19(3):281-287.
28. Donnelly N, Hall W, Christie P. The effects of the Cannabis Expiation Notice System on the prevalence of cannabis use in South Australia: evidence from the National Drug Strategy Household Surveys 1985-95. *Drug Alcohol Rev.* 2000;19(3):265-269.
29. Dutra LM, Parish WJ, Gourdet CK, Wylie SA, Wiley JL. Medical cannabis legalization and state-level prevalence of serious mental illness in the National Survey on Drug Use and Health (NSDUH) 2008-2015. *Int Rev Psychiatry.* 2018;30(3):203-215.
30. Estoup AC, Moise-Campbell C, Varma M, Stewart DG. The impact of marijuana legalization on adolescent use, consequences, and perceived risk. *Subst Use Misuse.* 2016;51(14):1881-1887.
31. Feige C, Miron JA. The opium wars, opium legalization and opium consumption in China. *Appl Econ Lett.* 2008;15(12):911-913.
32. Félix S, Portugal P. Drug decriminalization and the price of illicit drugs. *Int J Drug Policy.* 2017;39:121-129.
33. Gonçalves R, Lourenço A, da Silva SN. A social cost perspective in the wake of the Portuguese strategy for the fight against drugs. *Int J Drug Policy.* 2015;26(2):199-209.
34. Gorman DM, Huber Jr JC. Do medical cannabis laws encourage cannabis use? *Int J Drug Policy.* 2007;18(3):160-167.
35. Grant TM, Graham JC, Carlini BH, Ernst CC, Brown NN. Use of marijuana and other substances among pregnant and parenting women with substance use disorders: changes in Washington state after marijuana legalization. *J Stud Alcohol Drugs.* 2018;79(1):88-95.
36. Grucza RA, Vuolo M, Krauss MJ, et al. Cannabis decriminalization: a study of recent policy change in five U.S. states. *Int J Drug Policy.* 2018;59:67-75.
37. Grucza RA, Hur M, Agrawal A, et al. A reexamination of medical marijuana policies in relation to suicide risk. *Drug Alcohol Depend.* 2015;152:68-72.
38. Harper S, Strumpf EC, Kaufman JS. Do medical marijuana laws increase marijuana use? Replication study and extension. *Ann Epidemiol.* 2012;22(3):207-212.

## Appendix C: Included Studies

39. Harpin SB, Brooks-Russell A, Ma M, James KA, Levinson AH. adolescent marijuana use and perceived ease of access before and after recreational marijuana implementation in Colorado. *Subst Use Misuse*. 2018;53(3):451-456.
40. Hasin DS, Sarvet AL, Cerda M, et al. US adult illicit cannabis use, cannabis use disorder, and medical marijuana laws: 1991-1992 to 2012-2013. *JAMA Psychiatry*. 2017;74(6):579-588.
41. Hasin DS, Wall M, Keyes KM, et al. Medical marijuana laws and adolescent marijuana use in the USA from 1991 to 2014: results from annual, repeated cross-sectional surveys. *Lancet Psychiatry*. 2015;2(7):601-608.
42. Hasin D, Sarvet A, Cerda M, Keyes KM, Fink DS. Driving under the influence of alcohol or cannabis in the U.S., 1991-1992 to 2012-2013: relationship to state medical marijuana laws. *Alcohol Clin Exp Res*. 2017;41:250A.
43. Hoyte CO, Caruso J. The prevalence of marijuana in fatalities involving operators of motor vehicles in Denver County, Colorado, USA. *Clin Toxicol*. 2015;53(4):268.
44. Huber A, Newman R, LaFave D. Cannabis control and crime: medicinal use, depenalization and the war on drugs. *BE Journal of Economic Analysis & Policy*. 2016;16(4). doi:10.1515/bejeap-2015-0167
45. Hunt P, Pacula RL. early impacts of marijuana legalization: an evaluation of prices in Colorado and Washington. *J Prim Prev*. 2017;38(3):221-248.
46. Johnson J, Hodgkin D, Harris SK. The design of medical marijuana laws and adolescent use and heavy use of marijuana: analysis of 45 states from 1991 to 2011. *Drug Alcohol Depend*. 2017;170:1-8.
47. Jones J, Jones KN, Peil J. The impact of the legalization of recreational marijuana on college students. *Addict Behav*. 2018;77:255-259.
48. Jones JT, Baldwin A, Shu I. A comparison of meconium screening outcomes as an indicator of the impact of state-level relaxation of marijuana policy. *Drug Alcohol Depend*. 2015;156:e104-e105.
49. Kerr DCR, Bae H, Koval AL. Oregon recreational marijuana legalization: changes in undergraduates' marijuana use rates from 2008 to 2016. *Psychol Addict Behav*. 2018;32(6):670-678.
50. Kerr DCR, Bae H, Phibbs S, Kern AC. Changes in undergraduates' marijuana, heavy alcohol and cigarette use following legalization of recreational marijuana use in Oregon. *Addiction*. 2017;112(11):1992-2001. doi:10.1111/add.13906
51. Kerr WC, Lui C, Ye Y. Trends and age, period and cohort effects for marijuana use prevalence in the 1984-2015 US National Alcohol Surveys. *Addiction*. 2018;113(3):473-481. doi:10.1111/add.14031
52. Keyes KM, Wall M, Cerda M, et al. How does state marijuana policy affect US youth? Medical marijuana laws, marijuana use and perceived harmfulness: 1991-2014. *Addiction*. 2016;111(12):2187-2195.
53. Khatapoush S, Hallfors D. "Sending the wrong message": did medical marijuana legalization in California change attitudes about and use of marijuana? *J Drug Issues*. 2004;34(4):751-770.
54. Kim HS, Anderson JD, Saghafi O, Heard KJ, Monte AA. Cyclic vomiting presentations following marijuana liberalization in Colorado. *Acad Emerg Med*. 2015;22(6):694-699.
55. Kim HS, Hall KE, Genco EK, Van Dyke M, Barker E, Monte AA. Marijuana tourism and emergency department visits in Colorado. *N Engl J Med*. 2016;374(8):797-798.

## Appendix C: Included Studies

- 1
  - 2
  - 3
  - 4
  - 5
  - 6
  - 7
  - 8
  - 9
  - 10
  - 11
  - 12
  - 13
  - 14
  - 15
  - 16
  - 17
  - 18
  - 19
  - 20
  - 21
  - 22
  - 23
  - 24
  - 25
  - 26
  - 27
  - 28
  - 29
  - 30
  - 31
  - 32
  - 33
  - 34
  - 35
  - 36
  - 37
  - 38
  - 39
  - 40
  - 41
  - 42
  - 43
  - 44
  - 45
  - 46
  - 47
  - 48
  - 49
  - 50
  - 51
  - 52
  - 53
  - 54
  - 55
  - 56
  - 57
  - 58
  - 59
  - 60
56. Kim JH, Santaella J, Cerda M, Martins SS. Medical marijuana laws and annual opioid analgesic sales in the United States. *Drug Alcohol Depend.* 2015;156:e111.
57. Kim JH, Santaella J, Mauro PM, et al. Nonmedical use of prescription opioids and medical marijuana laws in the US from 2004-2013. *Drug Alcohol Depend.* 2017;171:e102-e103.
58. Kim JH, Santaella-Tenorio J, Mauro C, et al. State medical marijuana laws and the prevalence of opioids detected among fatally injured drivers. *Am J Public Health.* 2016;106(11):2032-2037.
59. Kosterman R, Bailey JA, Guttmannova K, et al. Marijuana legalization and parents' attitudes, use, and parenting in Washington state. *J Adolesc Health.* 2016;59(4):450-456.
60. Larimer ME, Lee CM, Kilmer JR, Rhew I, Fossos-Wong N. Risk perception, access, and use of marijuana among young adults following legalization in Washington state. *Alcohol Clin Exp Res.* 2015;39:261A.
61. Liang D, Bao Y, Wallace M, Grant I, Shi Y. Medical cannabis legalization and opioid prescriptions: evidence on US Medicaid enrollees during 1993-2014. *Addiction.* 2018;113(11):2060-2070.
62. Livingston MD, Barnett TE, Delcher C, Wagenaar AC. Recreational cannabis legalization and opioid-related deaths in Colorado, 2000-2015. *Am J Public Health.* 2017;107(11):1827-1829.
63. Lo SY, Baird GS, Hoofnagle A, Greene DN. THC use and marijuana legalization do not influence chronic opioid therapy compliance. *Am J Clin Pathol.* 2015;143:A046.
64. Lynne-Landsman SD, Livingston MD, Wagenaar AC. Effects of state medical marijuana laws on adolescent marijuana use. *Am J Public Health.* 2013;103(8):1500-1506.
65. Martins SS, Mauro CM, Santaella-Tenorio J, et al. State-level medical marijuana laws, marijuana use and perceived availability of marijuana among the general U.S. population. *Drug Alcohol Depend.* 2016;169:26-32.
66. Mason W, Fleming CB, Ringle JL, Hanson K, Gross TJ, Haggerty KP. Prevalence of marijuana and other substance use before and after Washington State's change from legal medical marijuana to legal medical and nonmedical marijuana: cohort comparisons in a sample of adolescents. *Subst Abus.* 2016;37(2):330-335.
67. Masten SV, Guenzburger GV. Changes in driver cannabinoid prevalence in 12 US states after implementing medical marijuana laws. *J Safety Res.* 2014;50:35-52.
68. Mauro C, Santaella J, Kim JH, Wall MM, Martins SS. Does perceived availability of marijuana explain changes in marijuana use after medical marijuana law implementation among U.S. adults? *Drug Alcohol Depend.* 2017;171:e134.
69. Mauro CM, Newswanger P, Santaella-Tenorio J, Mauro PM, Carliner H, Martins SS. Impact of medical marijuana laws on state-level marijuana use by age and gender, 2004-2013. *Prev Sci.* 2019;20(2):205-214. doi:10.1007/s11121-017-0848-3
70. Merker AM, Riaz M, Friedman S, Allegretti JR, Korzenik J. Legalization of medicinal marijuana has minimal impact on use patterns in patients with inflammatory bowel disease. *Inflamm Bowel Dis.* 2018;24(11):2309-2314.
71. Miech R, Johnston LA, O'Malley P, Bachman J, Schulenberg J, Patrick M. Trends in use of and attitudes toward marijuana among youth before and after decriminalization: the case of California 2007-2013. *Drug Alcohol Depend.* 2015;156:e151-e152.
72. Miller AM, Rosenman R, Cowan BW. Recreational marijuana legalization and college student use: early evidence. *SSM Popul Health.* 2017;3:649-657.



## Appendix C: Included Studies

73. Model KE. The effect of marijuana decriminalization on hospital emergency room drug episodes: 1975-1978. *J Am Stat Assoc.* 1993;88(423):737-747.
74. Morris RG, TenEyck M, Barnes JC, Kovandzic TV. The effect of medical marijuana laws on crime: evidence from state panel data, 1990-2006. *PloS One.* 2014;9(3):e92816.
75. Nappe T, Banerji S, Hoyte C. Drug exposure trends since decriminalization of marijuana in Colorado. *Clin Toxicol.* 2016;54(8):712-713.
76. Onders B, Casavant MJ, Spiller HA, Chounthirath T, Smith GA. Marijuana exposure among children younger than six years in the United States. *Clin Pediatr.* 2016;55(5):428-436.
77. Pacula RL, Kilmer B, Grossman M, Chaloupka FJ. Risks and prices: the role of user sanctions in marijuana markets. *BE Journal of Economic Analysis & Policy.* 2010;10(1).
78. Pacula RL, Powell D, Heaton P, Sevigny EL. Assessing the effects of medical marijuana laws on marijuana use: the devil is in the details. *J Policy Anal Manage.* 2015;34(1):7-31.
79. Parnes JE, Smith JK, Conner BT. Reefer madness or much ado about nothing? Cannabis legalization outcomes among young adults in the United States. *Int J Drug Policy.* 2018;56:116-120.
80. Phillips E, Gazmararian J. Implications of prescription drug monitoring and medical cannabis legislation on opioid overdose mortality. *J Opioid Manag.* 2017;13(4):229-239.
81. Plunk AD, Agrawal A, Harrell PT, et al. The impact of adolescent exposure to medical marijuana laws on high school completion, college enrollment and college degree completion. *Drug Alcohol Depend.* 2016;168:320-327.
82. Pollini RA, Romano E, Johnson MB, Lacey JH. The impact of marijuana decriminalization on California drivers. *Drug Alcohol Depend.* 2015;150:135-140.
83. Powell D, Pacula RL, Jacobson M. Do medical marijuana laws reduce addictions and deaths related to pain killers? *J Health Econ.* 2018;58:29-42.
84. Prue B. Prevalence of reported peyote use 1985-2010 effects of the American Indian Religious Freedom Act of 1994. *Am J Addict.* 2014;23(2):156-161.
85. Ramirez A. Marijuana, other drugs, and alcohol use by drivers in Washington state. *Alcohol Clin Exp Res.* 2017;41:314A.
86. Reith I. Two plants are better than one? *Contemp Drug Probl.* 2015;42(4):259-273.
87. Rodriguez CE, Sheeder J, Metz TD. Marijuana use in pregnant teens before and after legalization. *Reprod Sci.* 2016;1:282A.
88. Rohda J, Smith K, Smith L, Jacobitz K, Kirschner R. Impact of recreational marijuana legalization on synthetic cannabinoid use. *Clin Toxicol.* 2017;55(7):780.
89. Rusby JC, Westling E, Crowley R, Light JM. Legalization of recreational marijuana and community sales policy in Oregon: impact on adolescent willingness and intent to use, parent use, and adolescent use. *Psychol Addict Behav.* 2018;32(1):84-92.
90. Sabia JJ, Swigert J, Young T. The effect of medical marijuana laws on body weight. *Health Econ.* 2017;26(1):6-34.
91. Santaella-Tenorio J, Mauro CM, Wall MM, et al. US traffic fatalities, 1985-2014, and their relationship to medical marijuana laws. *Am J Public Health.* 2017;107(2):336-342.
92. Schmidt LA, Jacobs LM, Spetz J. Young people's more permissive views about marijuana: local impact of state laws or national trend? *Am J Public Health.* 2016;106(8):1498-1503.
93. Sevigny EL, Pacula RL, Heaton P. The effects of medical marijuana laws on potency. *Int J Drug Policy.* 2014;25(2):308-319.

## Appendix C: Included Studies

94. Shah AB, Hayes CJ, Lakkad M, Martin BC. Impact of medical marijuana legalization on opioid use, chronic opioid use and high-risk opioid use. *Value Health*. 2018;21(S1):S247.
95. Shepard EM, Blackley PR. Medical marijuana and crime: further evidence from the western states. *J Drug Issues*. 2016;46(2):122-134.
96. Shi Y. Medical marijuana policies and hospitalizations related to marijuana and opioid pain reliever. *Drug Alcohol Depend*. 2017;173:144-150.
97. Sokoya M, Eagles J, Okland T, et al. Patterns of facial trauma before and after legalization of marijuana in Denver, Colorado: a joint study between two Denver hospitals. *Am J Emerg Med*. 2018;36(5):780-783.
98. Steinemann S, Galanis D, Nguyen T, Biffi W. Motor vehicle crash fatalities and undercompensated care associated with legalization of marijuana. *J Trauma Acute Care Surg*. 2018;85(3):566-571.
99. Stolzenberg L, D'Alessio SJ, Dariano D. The effect of medical cannabis laws on juvenile cannabis use. *Int J Drug Policy*. 2016;27:82-88.
100. Straub H, Drennan KJ, Pflugeisen B. Maternal marijuana use: a natural experiment from prohibition to access. *Am J Obstet Gynecol*. 2017;216(S1):S554-S555.
101. Suggs DL. A qualitative and quantitative analysis of the impact of Nebraska's decriminalization of marijuana. *Law Hum Behav*. 1981;5(1):45-71.
102. Ullman DF. The effect of medical marijuana on sickness absence. *Health Econ*. 2017;26(10):1322-1327.
103. Urfer S, Morton J, Beall V, Feldmann J, Gunesch J. Analysis of DELTA9-tetrahydrocannabinol driving under the influence of drugs cases in Colorado from January 2011 to February 2014. *J Anal Toxicol*. 2014;38(8):575-581.
104. Wagner J, Leonard J, Jensen J, et al. The impact of marijuana legalization on reversible cerebral vasoconstriction syndrome. *Neurology*. 2016;86(S16):115.
105. Wall MM, Mauro C, Hasin DS, et al. Prevalence of marijuana use does not differentially increase among youth after states pass medical marijuana laws: commentary on Stolzenberg et al. (2015) and reanalysis of US National Survey on Drug Use in Households data 2002-2011. *Int J Drug Policy*. 2016;29:9-13.
106. Wall MM, Poh E, Cerda M, Keyes KM, Galea S, Hasin DS. Adolescent marijuana use from 2002 to 2008: higher in states with medical marijuana laws, cause still unclear. *Ann Epidemiol*. 2011;21(9):714-716.
107. Wang GS, Davies SD, Halmo LS, Sass A, Mistry RD. Impact of marijuana legalization in Colorado on adolescent emergency and urgent care visits. *J Adolesc Health*. 2018;63(2):239-241.
108. Wang GS, Hall K, Vigil D, Banerji S, Monte A, VanDyke M. Marijuana and acute health care contacts in Colorado. *Prev Med*. 2017;104:24-30.
109. Wang GS, Le Lait MC, Deakyne SJ, Bronstein AC, Bajaj L, Roosevelt G. Unintentional pediatric exposures to marijuana in Colorado, 2009-2015. *JAMA Pediatr*. 2016;170(9):e160971.
110. Wen H, Hockenberry JM. Association of medical and adult-use marijuana laws with opioid prescribing for Medicaid enrollees. *JAMA Intern Med*. 2018;178(5):673-679.
111. Wen H, Hockenberry JM, Cummings JR. The effect of medical marijuana laws on adolescent and adult use of marijuana, alcohol, and other substances. *J Health Econ*. 2015;42:64-80.

## Appendix C: Included Studies

- 1
- 2
- 3
- 4 112. Wen H, Hockenberry JM, Druss BG. The effect of medical marijuana laws on marijuana-
- 5 related attitude and perception among us adolescents and young adults. *Prev Sci.*
- 6 2019;20(2):215-223.
- 7 113. Williams AR, Santaella-Tenorio J, Mauro CM, Levin FR, Martins SS. Loose regulation of
- 8 medical marijuana programs associated with higher rates of adult marijuana use but not
- 9 cannabis use disorder. *Addiction.* 2017;112(11):1985-1991.
- 10 114. Williams J, Bretteville-Jensen AL. Does liberalizing cannabis laws increase cannabis use?
- 11 *J Health Econ.* 2014;36:20-32.
- 12
- 13
- 14
- 15
- 16
- 17
- 18
- 19
- 20
- 21
- 22
- 23
- 24
- 25
- 26
- 27
- 28
- 29
- 30
- 31
- 32
- 33
- 34
- 35
- 36
- 37
- 38
- 39
- 40
- 41
- 42
- 43
- 44
- 45
- 46
- 47
- 48
- 49
- 50
- 51
- 52
- 53
- 54
- 55
- 56
- 57
- 58
- 59
- 60



# Reporting checklist for systematic review and meta-analysis.

Based on the PRISMA guidelines.

## Instructions to authors

Complete this checklist by entering the page numbers from your manuscript where readers will find each of the items listed below.

Your article may not currently address all the items on the checklist. Please modify your text to include the missing information. If you are certain that an item does not apply, please write "n/a" and provide a short explanation.

Upload your completed checklist as an extra file when you submit to a journal.

In your methods section, say that you used the PRISMA reporting guidelines, and cite them as:

Moher D, Liberati A, Tetzlaff J, Altman DG, The PRISMA Group. Preferred Reporting Items for Systematic Reviews and Meta-Analyses: The PRISMA Statement

|                     | Reporting Item                                                                                                                                                                                                                                                                                                                | Page Number |
|---------------------|-------------------------------------------------------------------------------------------------------------------------------------------------------------------------------------------------------------------------------------------------------------------------------------------------------------------------------|-------------|
| <b>Title</b>        |                                                                                                                                                                                                                                                                                                                               |             |
|                     | <a href="#">#1</a> Identify the report as a systematic review, meta-analysis, or both.                                                                                                                                                                                                                                        | 1           |
| <b>Abstract</b>     |                                                                                                                                                                                                                                                                                                                               |             |
| Structured summary  | <a href="#">#2</a> Provide a structured summary including, as applicable: background; objectives; data sources; study eligibility criteria, participants, and interventions; study appraisal and synthesis methods; results; limitations; conclusions and implications of key findings; systematic review registration number | 2           |
| <b>Introduction</b> |                                                                                                                                                                                                                                                                                                                               |             |
| Rationale           | <a href="#">#3</a> Describe the rationale for the review in the context of what is already known.                                                                                                                                                                                                                             | 4           |
| Objectives          | <a href="#">#4</a> Provide an explicit statement of questions being addressed with reference to participants, interventions, comparisons, outcomes, and study design (PICOS).                                                                                                                                                 | 5           |

|    |                 |                     |                                                                                 |
|----|-----------------|---------------------|---------------------------------------------------------------------------------|
| 1  | <b>Methods</b>  |                     |                                                                                 |
| 2  |                 |                     |                                                                                 |
| 3  | Protocol and    | <a href="#">#5</a>  | Indicate if a review protocol exists, if and where it can be                    |
| 4  | registration    |                     | accessed (e.g., Web address) and, if available, provide                         |
| 5  |                 |                     | registration information including the registration number.                     |
| 6  |                 |                     |                                                                                 |
| 7  |                 |                     |                                                                                 |
| 8  | Eligibility     | <a href="#">#6</a>  | Specify study characteristics (e.g., PICOS, length of follow-up)                |
| 9  | criteria        |                     | and report characteristics (e.g., years considered, language,                   |
| 10 |                 |                     | publication status) used as criteria for eligibility, giving rational           |
| 11 |                 |                     |                                                                                 |
| 12 |                 |                     |                                                                                 |
| 13 | Information     | <a href="#">#7</a>  | Describe all information sources in the search (e.g., databases                 |
| 14 | sources         |                     | with dates of coverage, contact with study authors to identify                  |
| 15 |                 |                     | additional studies) and date last searched.                                     |
| 16 |                 |                     |                                                                                 |
| 17 |                 |                     |                                                                                 |
| 18 | Search          | <a href="#">#8</a>  | Present full electronic search strategy for at least one database,              |
| 19 |                 |                     | including any limits used, such that it could be repeated.                      |
| 20 |                 |                     |                                                                                 |
| 21 |                 |                     |                                                                                 |
| 22 |                 |                     |                                                                                 |
| 23 | Study selection | <a href="#">#9</a>  | State the process for selecting studies (i.e., for screening, for               |
| 24 |                 |                     | determining eligibility, for inclusion in the systematic review,                |
| 25 |                 |                     | and, if applicable, for inclusion in the meta-analysis).                        |
| 26 |                 |                     |                                                                                 |
| 27 |                 |                     |                                                                                 |
| 28 | Data collection | <a href="#">#10</a> | Describe the method of data extraction from reports (e.g., piloted              |
| 29 | process         |                     | forms, independently by two reviewers) and any processes for                    |
| 30 |                 |                     | obtaining and confirming data from investigators.                               |
| 31 |                 |                     |                                                                                 |
| 32 |                 |                     |                                                                                 |
| 33 | Data items      | <a href="#">#11</a> | List and define all variables for which data were sought (e.g.,                 |
| 34 |                 |                     | PICOS, funding sources), and any assumptions and                                |
| 35 |                 |                     | simplifications made.                                                           |
| 36 |                 |                     |                                                                                 |
| 37 |                 |                     |                                                                                 |
| 38 |                 |                     |                                                                                 |
| 39 | Risk of bias in | <a href="#">#12</a> | Describe methods used for assessing risk of bias in individual                  |
| 40 | individual      |                     | studies (including specification of whether this was done at the                |
| 41 | studies         |                     | study or outcome level, or both), and how this information is to                |
| 42 |                 |                     | be used in any data synthesis.                                                  |
| 43 |                 |                     |                                                                                 |
| 44 |                 |                     |                                                                                 |
| 45 | Summary         | <a href="#">#13</a> | State the principal summary measures (e.g., risk ratio, difference              |
| 46 | measures        |                     | in means).                                                                      |
| 47 |                 |                     |                                                                                 |
| 48 |                 |                     |                                                                                 |
| 49 | Planned methods | <a href="#">#14</a> | Describe the methods of handling data and combining results of                  |
| 50 | of analysis     |                     | studies, if done, including measures of consistency (e.g., I <sup>2</sup> ) for |
| 51 |                 |                     | each meta-analysis.                                                             |
| 52 |                 |                     |                                                                                 |
| 53 |                 |                     |                                                                                 |
| 54 |                 |                     |                                                                                 |
| 55 | Risk of bias    | <a href="#">#15</a> | Specify any assessment of risk of bias that may affect the                      |
| 56 | across studies  |                     | cumulative evidence (e.g., publication bias, selective reporting                |
| 57 |                 |                     | within studies).                                                                |
| 58 |                 |                     |                                                                                 |
| 59 |                 |                     |                                                                                 |
| 60 |                 |                     |                                                                                 |

|    |                   |                     |                                                                      |               |
|----|-------------------|---------------------|----------------------------------------------------------------------|---------------|
| 1  | Additional        | <a href="#">#16</a> | Describe methods of additional analyses (e.g., sensitivity or        | N/A           |
| 2  | analyses          |                     | subgroup analyses, meta-regression), if done, indicating which       |               |
| 3  |                   |                     | were pre-specified.                                                  |               |
| 4  |                   |                     |                                                                      |               |
| 5  |                   |                     |                                                                      |               |
| 6  | <b>Results</b>    |                     |                                                                      |               |
| 7  |                   |                     |                                                                      |               |
| 8  | Study selection   | <a href="#">#17</a> | Give numbers of studies screened, assessed for eligibility, and      | 7-8, Figure 1 |
| 9  |                   |                     | included in the review, with reasons for exclusions at each stage,   |               |
| 10 |                   |                     | ideally with a <a href="#">flow diagram</a> .                        |               |
| 11 |                   |                     |                                                                      |               |
| 12 |                   |                     |                                                                      |               |
| 13 |                   |                     |                                                                      |               |
| 14 | Study             | <a href="#">#18</a> | For each study, present characteristics for which data were          | Supplementary |
| 15 | characteristics   |                     | extracted (e.g., study size, PICOS, follow-up period) and provide    | Table 1       |
| 16 |                   |                     | the citation.                                                        |               |
| 17 |                   |                     |                                                                      |               |
| 18 |                   |                     |                                                                      |               |
| 19 | Risk of bias      | <a href="#">#19</a> | Present data on risk of bias of each study and, if available, any    | Supplementary |
| 20 | within studies    |                     | outcome-level assessment (see Item 12).                              | Table 1       |
| 21 |                   |                     |                                                                      |               |
| 22 |                   |                     |                                                                      |               |
| 23 | Results of        | <a href="#">#20</a> | For all outcomes considered (benefits and harms), present, for       | Supplementary |
| 24 | individual        |                     | each study: (a) simple summary data for each intervention group      | Table 1       |
| 25 | studies           |                     | and (b) effect estimates and confidence intervals, ideally with a    |               |
| 26 |                   |                     | forest plot.                                                         |               |
| 27 |                   |                     |                                                                      |               |
| 28 |                   |                     |                                                                      |               |
| 29 |                   |                     |                                                                      |               |
| 30 | Synthesis of      | <a href="#">#21</a> | Present the main results of the review. If meta-analyses are done,   | 9-12          |
| 31 | results           |                     | include for each, confidence intervals and measures of               |               |
| 32 |                   |                     | consistency.                                                         |               |
| 33 |                   |                     |                                                                      |               |
| 34 |                   |                     |                                                                      |               |
| 35 | Risk of bias      | <a href="#">#22</a> | Present results of any assessment of risk of bias across studies     | N/A           |
| 36 | across studies    |                     | (see Item 15).                                                       |               |
| 37 |                   |                     |                                                                      |               |
| 38 |                   |                     |                                                                      |               |
| 39 | Additional        | <a href="#">#23</a> | Give results of additional analyses, if done (e.g., sensitivity or   | N/A           |
| 40 | analysis          |                     | subgroup analyses, meta-regression [see Item 16]).                   |               |
| 41 |                   |                     |                                                                      |               |
| 42 |                   |                     |                                                                      |               |
| 43 | <b>Discussion</b> |                     |                                                                      |               |
| 44 |                   |                     |                                                                      |               |
| 45 | Summary of        | <a href="#">#24</a> | Summarize the main findings, including the strength of evidence      | 12-14         |
| 46 | Evidence          |                     | for each main outcome; consider their relevance to key groups        |               |
| 47 |                   |                     | (e.g., health care providers, users, and policy makers               |               |
| 48 |                   |                     |                                                                      |               |
| 49 |                   |                     |                                                                      |               |
| 50 | Limitations       | <a href="#">#25</a> | Discuss limitations at study and outcome level (e.g., risk of bias), | 14-15         |
| 51 |                   |                     | and at review level (e.g., incomplete retrieval of identified        |               |
| 52 |                   |                     | research, reporting bias).                                           |               |
| 53 |                   |                     |                                                                      |               |
| 54 |                   |                     |                                                                      |               |
| 55 |                   |                     |                                                                      |               |
| 56 | Conclusions       | <a href="#">#26</a> | Provide a general interpretation of the results in the context of    | 15            |
| 57 |                   |                     | other evidence, and implications for future research.                |               |
| 58 |                   |                     |                                                                      |               |
| 59 |                   |                     |                                                                      |               |
| 60 |                   |                     |                                                                      |               |

**Funding**

Funding [#27](#) Describe sources of funding or other support (e.g., supply of data) for the systematic review; role of funders for the systematic review. 16

## Notes:

- 17: 7-8, Figure 1
- 18: Supplementary Table 1
- 19: Supplementary Table 1
- 20: Supplementary Table 1 The PRISMA checklist is distributed under the terms of the Creative Commons Attribution License CC-BY. This checklist was completed on 19. October 2019 using <https://www.goodreports.org/>, a tool made by the [EQUATOR Network](#) in collaboration with [Penelope.ai](#)

# BMJ Open

## Impact evaluations of drug decriminalization and legal regulation on drug use, health and social harms: A systematic review

|                                 |                                                                                                                                                                                                                                                                                                                                                                                                                                                                                                                                                                                 |
|---------------------------------|---------------------------------------------------------------------------------------------------------------------------------------------------------------------------------------------------------------------------------------------------------------------------------------------------------------------------------------------------------------------------------------------------------------------------------------------------------------------------------------------------------------------------------------------------------------------------------|
| Journal:                        | <i>BMJ Open</i>                                                                                                                                                                                                                                                                                                                                                                                                                                                                                                                                                                 |
| Manuscript ID                   | bmjopen-2019-035148.R1                                                                                                                                                                                                                                                                                                                                                                                                                                                                                                                                                          |
| Article Type:                   | Original research                                                                                                                                                                                                                                                                                                                                                                                                                                                                                                                                                               |
| Date Submitted by the Author:   | 13-Apr-2020                                                                                                                                                                                                                                                                                                                                                                                                                                                                                                                                                                     |
| Complete List of Authors:       | Scheim, Ayden; Drexel University, Epidemiology and Biostatistics; St Michael's Hospital, Centre on Drug Policy Evaluation<br>Maghsoudi, Nazlee; St Michael's Hospital, Centre on Drug Policy Evaluation; University of Toronto, Institute of Health Policy, Management and Evaluation<br>Marshall, Zack; McGill University, Social Work<br>Churchill, Siobhan; Western University, Epidemiology and Biostatistics<br>Ziegler, Carolyn; Unity Health Toronto<br>Werb, Dan; University of California San Diego, Medicine; St Michael's Hospital, Centre on Drug Policy Evaluation |
| <b>Primary Subject Heading</b>: | Public health                                                                                                                                                                                                                                                                                                                                                                                                                                                                                                                                                                   |
| Secondary Subject Heading:      | Addiction, Epidemiology, Health policy                                                                                                                                                                                                                                                                                                                                                                                                                                                                                                                                          |
| Keywords:                       | Substance misuse < PSYCHIATRY, PUBLIC HEALTH, LAW (see Medical Law)                                                                                                                                                                                                                                                                                                                                                                                                                                                                                                             |
|                                 |                                                                                                                                                                                                                                                                                                                                                                                                                                                                                                                                                                                 |

SCHOLARONE™  
Manuscripts



I, the Submitting Author has the right to grant and does grant on behalf of all authors of the Work (as defined in the below author licence), an exclusive licence and/or a non-exclusive licence for contributions from authors who are: i) UK Crown employees; ii) where BMJ has agreed a CC-BY licence shall apply, and/or iii) in accordance with the terms applicable for US Federal Government officers or employees acting as part of their official duties; on a worldwide, perpetual, irrevocable, royalty-free basis to BMJ Publishing Group Ltd ("BMJ") its licensees and where the relevant Journal is co-owned by BMJ to the co-owners of the Journal, to publish the Work in this journal and any other BMJ products and to exploit all rights, as set out in our [licence](#).

The Submitting Author accepts and understands that any supply made under these terms is made by BMJ to the Submitting Author unless you are acting as an employee on behalf of your employer or a postgraduate student of an affiliated institution which is paying any applicable article publishing charge ("APC") for Open Access articles. Where the Submitting Author wishes to make the Work available on an Open Access basis (and intends to pay the relevant APC), the terms of reuse of such Open Access shall be governed by a Creative Commons licence – details of these licences and which [Creative Commons](#) licence will apply to this Work are set out in our licence referred to above.

Other than as permitted in any relevant BMJ Author's Self Archiving Policies, I confirm this Work has not been accepted for publication elsewhere, is not being considered for publication elsewhere and does not duplicate material already published. I confirm all authors consent to publication of this Work and authorise the granting of this licence.

1  
2  
3 **Impact evaluations of drug decriminalization and legal regulation on drug use, health and**  
4 **social harms: A systematic review**  
5

6 Ayden I. Scheim,<sup>1,2,3</sup> Nazlee Maghsoudi,<sup>1,4</sup> Zack Marshall,<sup>5</sup> Siobhan Churchill,<sup>6</sup> Carolyn Ziegler,<sup>7</sup>  
7 Dan Werb<sup>1,2,4</sup>  
8  
9

10 1. Centre on Drug Policy Evaluation, Li Ka Shing Knowledge Institute, St. Michael's Hospital,  
11 Toronto, ON, Canada  
12

13 2. Department of Medicine, University of California San Diego, La Jolla, CA  
14

15 3. Department of Epidemiology, Dornsife School of Public Health, Philadelphia, PA  
16

17 4. Institute of Health Policy, Management and Evaluation, University of Toronto, Toronto, ON,  
18 Canada  
19

20 5. Department of Social Work, McGill University, Montreal, QC, Canada  
21

22 6. Department of Epidemiology and Biostatistics, Western University, London, ON, Canada  
23

24 7. Health Sciences Library, St. Michael's Hospital, Toronto, ON, Canada  
25

26 **Corresponding Author:**  
27

28 Dan Werb  
29 St. Michael's Hospital  
30 30 Bond Street  
31 Toronto, ON, Canada  
32 M5B 1X1  
33  
34  
35  
36

37 Email: [dwerb@ucsd.edu](mailto:dwerb@ucsd.edu)  
38

39 Phone: 858-205-8262  
40  
41  
42

43 **Word Count:** 4530  
44  
45  
46  
47  
48  
49  
50  
51  
52  
53  
54  
55  
56  
57  
58  
59  
60



## ABSTRACT

**Objectives:** To review the metrics and findings of studies evaluating effects of drug decriminalization or legal regulation on drug availability, use, or related health and social harms globally.

**Design:** Systematic review with narrative synthesis.

**Data sources:** We searched MEDLINE, Embase, PsycINFO, Web of Science, and six additional databases for publications from 1 January 1970 through 4 October 2018.

**Inclusion criteria:** Peer-reviewed articles or published abstracts in any language with quantitative data on drug availability, use, or related health and social harms collected before and after implementation of *de jure* drug decriminalization or legal regulation.

**Data extraction and synthesis:** Two independent reviewers screened titles, abstracts, and articles for inclusion. Extraction and quality appraisal (modified Downs and Black checklist) were performed by one reviewer and checked by a second, with discrepancies resolved by a third. We coded study-level outcome measures into metric groupings and categorized the estimated direction of association between the legal change and outcomes of interest.

**Results:** We screened 4860 titles and 221 full texts and included 114 articles. Most (n=104, 91.2%) were from the U.S., evaluated cannabis reform (n=109, 95.6%), and focused on legal regulation (n=96, 84.2%). 224 study outcome measures were categorized into 32 metrics, most commonly prevalence (39.5% of studies), frequency (14.0%), or perceived harmfulness (10.5%) of use of the decriminalized or regulated drug; or use of tobacco, alcohol, or other drugs (12.3%). Across all substance use metrics, legal reform was most often not associated with changes in use.

**Conclusions:** Studies evaluating drug decriminalization and legal regulation are concentrated in the U.S. and on cannabis legalization. Despite the range of outcomes potentially impacted by drug law reform, extant research is narrowly focused, with a particular emphasis on the prevalence of use. Metrics in drug law reform evaluations require improved alignment with relevant health and social outcomes.

### Strengths and limitations of this study

- This is the first study to review all literature on the health and social impacts of decriminalization or legal regulation of drugs.
- We systematically searched 10 databases over a 38-year period, without language restrictions.
- The review was limited to study designs appropriate for evaluating interventions, nevertheless, most included studies used relatively weak evaluation designs.
- Included outcomes were heterogeneous and not quantitatively synthesized.
- Heterogeneity in the details and implementation of decriminalization or legal regulation policies was not considered in this review.

## INTRODUCTION

An estimated 271 million people used an internationally scheduled (“illicit”) drug in 2017, corresponding to 5.5% of the global population aged 15-64.[1] Despite decades of investment, policies aimed at reducing supply and demand have demonstrated limited effectiveness.[2,3] Moreover, prohibitive and punitive drug policies have had counterproductive effects by contributing to HIV and hepatitis C transmission,[4,5] fatal overdose,[6] mass incarceration and other human rights violations,[7,8] and drug market violence.[9] As a result, there have been growing calls for drug law reform [10–12] and in 2019, the United Nations Chief Executives Board endorsed decriminalization of drug use and possession.[13] Against this backdrop, as of 2017 approximately 23 countries had implemented *de jure* decriminalization or legal regulation of one or more previously illegal drugs.[14–16]

A wide range of health and social outcomes are affected by psychoactive drug production, sales, and use, and thus are potentially impacted by drug law reform. Nutt and colleagues have categorized these as physical harms (e.g., drug-related morbidity and mortality to users, injury to non-users), psychological harms (e.g., dependence), and social harms (e.g., loss of tangibles, environmental damage).[17,18] 2Concomitantly, a diverse and sometimes competing set of goals motivate drug policy development, including ameliorating the poor health and social marginalization experienced by people who use drugs problematically, shifting patterns of use to less harmful products or modes of administration, curtailing illegal markets and drug-related crime, and reducing the economic burden of drug-related harms.[19]

Given ongoing interest by states in drug law reform, as well as the recent position statement by the UN Chief Executives Board endorsing drug decriminalization,[13] a comprehensive understanding of their impacts to date is required. However, the scientific literature has not been well-characterized, and thus the state of the evidence related to these heterogenous policy targets remains largely unclear. Reviews in the scientific literature, including two meta-analyses, are narrowly focused on adolescent cannabis use. Dirisu et al. found no conclusive evidence that cannabis legalization for medical or recreational purposes increases cannabis use by young people.[20] In the two meta-analyses, Sarvet et al. found that the implementation of medical

1  
2  
3 cannabis policies in the United States (U.S.) did not lead to increases in the prevalence of past-  
4 month cannabis use among adolescents [21] and Melchior et al. found a small increase in use  
5 following recreational legalization that was reported only among lower-quality studies.[22]  
6  
7  
8  
9

10 Given increasing interest in quantifying the impact of drug law reform, as well as a lack of  
11 systematic assessment of outcomes beyond adolescent cannabis use to date, we conducted a  
12 systematic review of original peer-reviewed research evaluating the impacts of (a) legal  
13 regulation and (b) drug decriminalization on drug availability, use, or related health and social  
14 harms. Our primary aim is to characterize studies with respect to metrics and indicators used.  
15 The secondary aim is to summarize the findings and methodologic quality of studies to date.  
16  
17  
18  
19  
20

## 21 **METHODS**

22  
23  
24 Consistent with our aim of synthesizing evidence on the impacts of decriminalization and  
25 legal regulation across the spectrum of potential health and social effects, we conducted a  
26 systematic review using narrative synthesis [23] without meta-analysis. Preferred Reporting  
27 Items for Systematic Reviews and Meta-Analyses (PRISMA) guidelines were followed in  
28 preparing this manuscript.[24] The review protocol was registered in PROSPERO  
29 (CRD42017079681) and can be found online at  
30  
31 [https://www.crd.york.ac.uk/prospero/display\\_record.php?RecordID=79681](https://www.crd.york.ac.uk/prospero/display_record.php?RecordID=79681).  
32  
33  
34  
35  
36  
37

### 38 **Search Strategy and Selection Criteria**

39 The review team developed, piloted, and refined the search strategy in consultation with a  
40 research librarian and content experts. We searched MEDLINE, Embase, PsycINFO, Web of  
41 Science, Criminal Justice Abstracts, Applied Social Sciences Index & Abstracts, International  
42 Bibliography of the Social Sciences, PAIS Index, Policy File Index, and Sociological Abstracts  
43 for publications from 1 January 1970 through 4 October 2018. We used MeSH terms and  
44 keywords related to (a) scheduled psychoactive drugs (b) legal regulation or decriminalization  
45 policies, and (c) quantitative study designs. Search terms specific to health and social outcomes  
46 were not employed so that the search would capture the broad range of outcomes of interest. See  
47 Appendix A for the final MEDLINE search strategy. For conference abstracts, we contacted  
48  
49  
50  
51  
52  
53  
54  
55  
56  
57  
58  
59  
60

1  
2  
3 authors for additional information on study methods and to identify subsequent relevant  
4 publications.  
5  
6  
7

8 We included peer-reviewed journal articles or conference abstracts reporting on original  
9 quantitative studies that collected data both before and after the implementation of drug  
10 decriminalization or legal regulation. We did not consider as original research studies that  
11 reproduced secondary data without conducting original statistical analyses of the data. We  
12 defined decriminalization as the removal of criminal penalties for drug use and/or possession  
13 (allowing for civil or administrative sanctions) and legal regulation as the development of a legal  
14 regulatory framework for the use, production, and sale of formerly illegal psychoactive drugs.  
15 Studies were excluded if they evaluated *de facto* (e.g., changes in enforcement practices) rather  
16 than *de jure* decriminalization or legal regulation (changes to the law). This exclusion applied to  
17 studies analyzing changes in outcomes following the U.S. Justice Department 2009 memo  
18 deprioritizing prosecution of cannabis-related offences legal under state medical cannabis laws.  
19 Eligible studies included outcome measures pertaining to drug availability, use, or related health  
20 and social harms. We used the schema developed by Nutt and colleagues to conceptualize health  
21 and social harms, including those to users (physical, psychological, and social) and to others  
22 (injury or social harm).[18]  
23  
24  
25  
26  
27  
28  
29  
30  
31  
32  
33  
34

35 Both observational studies and randomized controlled trials were eligible in principle, but no  
36 trials were identified. There were no geographic or language restrictions; titles, abstracts, and  
37 full-texts were translated on an as-needed basis for screening and data extraction. We excluded  
38 cross-sectional studies (unless they were repeated) and studies lacking pre- and post-  
39 implementation data collection because such designs are inappropriate for evaluating  
40 intervention effects.  
41  
42  
43  
44  
45

#### 46 **Data Analysis**

47 Screening and data extraction were conducted in DistillerSR (Evidence Partners, Ottawa,  
48 Ontario). We began with title-only screening to identify potentially relevant titles. Two reviewers  
49 screened each title. Unless both reviewers independently decided a title should be excluded, it  
50 was advanced to the next stage. Next, two reviewers independently screened each potentially  
51 eligible abstract. Inter-rater reliability was good (weighted Kappa at the question level=0.75). At  
52  
53  
54  
55  
56  
57  
58  
59  
60

1  
2  
3 this stage, we retrieved full-text copies of all remaining references, which were screened  
4 independently by two reviewers. Disagreements on inclusion were resolved through discussion  
5 with the first author. Finally, one reviewer extracted data from each included publication using a  
6 standardized, pre-piloted form and performed quality appraisal. A second reviewer double-  
7 checked data extraction and quality appraisal for every publication, and the first author resolved  
8 any discrepancies.  
9  
10  
11  
12  
13  
14

15 The data extraction form included information on study characteristics (author, title, year,  
16 geographic location), type of legal change studied and drug(s) impacted, details and timing of the  
17 legal change (e.g., medical vs. recreational cannabis regulation), study design, sampling  
18 approach, sample characteristics (size, age range, proportion female), and quantitative estimates  
19 of association. We coded each study-level outcome measure into one metric grouping, using 24  
20 pre-specified categories and a free-text field (see Figure 1 for full list). Examples of metrics  
21 include: prevalence of use of the decriminalized or regulated drug, overdose or poisoning, and  
22 non-drug crime.  
23  
24  
25  
26  
27  
28  
29

30 We also categorized the estimated direction of association of the legal change on outcome  
31 measure(s) of interest (beneficial, harmful, mixed, or null).<sup>2</sup> These associations were coded at  
32 the outcome (not study) level and classified as beneficial if a statistically significant increase in a  
33 positive outcome (e.g., educational attainment) or decrease in a negative outcome (e.g.,  
34 substance use disorder) was attributed to implementation of decriminalization or legal regulation,  
35 and vice-versa for harmful associations. The association was categorized as mixed if associations  
36 were both harmful and beneficial across participant subgroups, exposure definitions (e.g., loosely  
37 vs. tightly regulated medical cannabis access), or timeframes. Although any use of cannabis and  
38 other psychoactive drugs need not be problematic at the individual level, we categorized drug  
39 use as a negative outcome given that population-level increases in use may correspond to  
40 increases in negative consequences; we thought that this cautious approach to categorization was  
41 appropriate given that such increases are generally conceptualized as negative within the  
42 scientific literature. For outcomes that are not unambiguously negative or positive, the coding  
43 approach was pre-determined taking a societal perspective. For example, increased healthcare  
44 utilization (e.g., hospital visits due to cannabis use) was coded as negative because of the  
45 increased burden placed on healthcare systems. The association was categorized as null if no  
46  
47  
48  
49  
50  
51  
52  
53  
54  
55  
56  
57  
58  
59  
60

1  
2  
3 statistically significant changes following implementation of drug decriminalization or legal  
4 regulation were detected. We set statistical significance at  $\alpha=0.05$ , including in cases where  
5 authors used more liberal criteria.  
6  
7

8  
9 Quality assessment at the study level was conducted for each full-length article using a modified  
10 version of the Downs and Black checklist [25] for observational studies (see Appendix B), which  
11 assesses internal validity (bias), external validity, and reporting. Each study could receive up to  
12 18 points, with higher scores indicating more methodologically rigorous studies. Conference  
13 abstracts were not subjected to quality assessment due to limited methodologic details.  
14  
15  
16  
17

### 18 **Patient and Public Involvement**

19 This systematic review of existing studies did not include patient or public involvement.  
20  
21  
22

## 23 **RESULTS**

### 24 **Study Characteristics**

25  
26 As shown in the PRISMA Flow Diagram (Figure 2), we screened 4860 titles and abstracts and  
27 213 full texts, with 114 articles meeting inclusion criteria (Appendix C). Key reasons for  
28 exclusion at the full-text screening stage were that the article did not report on original  
29 quantitative research ( $n=59$ ) or did not evaluate decriminalization or legal regulation as defined  
30 herein ( $n=23$ ). Details of each included study are presented in Supplementary Table 1. Included  
31 studies had final publication dates from 1976-2019; 44.7% ( $n=51$ ) were first published in 2017-  
32 2018, 43.9% ( $n=50$ ) were published in 2014-2016 and 11.4% ( $n=13$ ) were published before  
33 2014.  
34  
35  
36  
37  
38  
39  
40  
41  
42

43 Characteristics of included studies are described in Table 1, both overall and stratified by  
44 whether they evaluated decriminalization ( $n=19$ ) or legalization ( $n=96$ ) policies (one study  
45 evaluated both policies). Most studies ( $n=104$ , 91.2%) were from the U.S. and examined impacts  
46 of liberalizing cannabis laws ( $n=109$ , 95.6%). Countries represented in non-U.S. studies included  
47 Australia, Belgium, China, Czech Republic, Mexico, and Portugal. The most common study  
48 designs were repeated cross-sectional ( $n=74$ , 64.9%) or controlled before-and-after ( $n=26$ ,  
49 22.8%) studies and the majority of studies ( $n=87$ , 76.3%) used population-based sampling  
50  
51  
52  
53  
54  
55  
56  
57  
58  
59  
60



**Table 1. Characteristics of studies evaluating drug decriminalization or legal regulation, 1970-2018**

| <b>Characteristic</b>           | <b>Total (%)<br/>n (%)<br/>(n = 114)</b> | <b>Decriminalization<sup>a</sup><br/>n (%)<br/>(n =19)</b> | <b>Legal regulation<sup>a</sup><br/>n (%)<br/>(n =96)</b> |
|---------------------------------|------------------------------------------|------------------------------------------------------------|-----------------------------------------------------------|
| <b>Country</b>                  |                                          |                                                            |                                                           |
| United States                   | 104 (91.2)                               | 10 (52.6)                                                  | 95 (99.0)                                                 |
| Australia                       | 3 (2.6)                                  | 3 (15.8)                                                   | 0 (0.0)                                                   |
| Portugal                        | 2 (1.8)                                  | 2 (10.5)                                                   | 0 (0.0)                                                   |
| China                           | 1 (0.9)                                  | 0 (0.0)                                                    | 1 (1.0)                                                   |
| Czech Republic                  | 1 (0.9)                                  | 1 (5.3)                                                    | 0 (0.0)                                                   |
| Mexico                          | 1 (0.9)                                  | 1 (5.3)                                                    | 0 (0.0)                                                   |
| Multi-country <sup>b</sup>      | 2 (1.8)                                  | 2 (10.5)                                                   | 0 (0.0)                                                   |
| <b>Focus of drug law reform</b> |                                          |                                                            |                                                           |
| Cannabis                        | 109 (95.6)                               | 15 (78.9)                                                  | 95 (99.0)                                                 |
| Opium                           | 1 (0.9)                                  | 0 (0.0)                                                    | 1 (1.0)                                                   |
| Peyote                          | 1 (0.9)                                  | 1 (5.3)                                                    | 0 (0.0)                                                   |
| Multiple/All drugs              | 3 (2.6)                                  | 3 (15.8)                                                   | 0 (0.0)                                                   |
| <b>Study design</b>             |                                          |                                                            |                                                           |
| Cohort                          | 4 (3.5)                                  | 0 (0.0)                                                    | 4 (4.2)                                                   |
| Controlled before-and-after     | 26 (22.8)                                | 6 (31.6)                                                   | 20 (20.8)                                                 |
| Interrupted time series         | 6 (5.3)                                  | 0 (0.0)                                                    | 6 (6.3)                                                   |
| Repeated cross-sectional        | 74 (64.9)                                | 11 (57.9)                                                  | 64 (66.7)                                                 |
| Uncontrolled before-and-after   | 4 (3.5)                                  | 2 (10.5)                                                   | 2 (2.1)                                                   |
| <b>Sampling approach</b>        |                                          |                                                            |                                                           |
| Convenience                     | 22 (19.3)                                | 5 (26.3)                                                   | 18 (18.8)                                                 |
| Population-based                | 87 (76.3)                                | 13 (68.4)                                                  | 74 (77.1)                                                 |
| Administrative records          | 45 (39.5)                                | 6 (31.6)                                                   | 39 (40.6)                                                 |
| Household survey                | 25 (21.9)                                | 5 (26.3)                                                   | 20 (20.8)                                                 |
| School-based survey             | 17 (14.9)                                | 2 (10.5)                                                   | 15 (15.6)                                                 |
| Unspecified                     | 5 (4.2)                                  | 1 (5.3)                                                    | 4 (4.2)                                                   |

a. Combined total exceeds number of studies because some evaluated both decriminalization and legal regulation.

b. One global study and one multi-country European study including Belgium and Portugal.

methods. Figure 3 illustrates the geographic distribution of studies among countries where national or subnational governments had decriminalized or legally regulated one or more drugs.

### Study Quality

Quality assessment was performed for the 93 full-length articles included in the review, excluding 21 conference abstracts (Supplementary Table 1). Scores ranged from 7 to 18 of 18

possible points, with a mean of 14.4 (SD=2.56). Quality scores were similar comparing U.S. to non-U.S.-based studies ( $X=14.4$  and  $13.7$ , respectively,  $p=0.386$ ) but higher for studies evaluating legal regulation ( $X=14.8$ ) versus decriminalization ( $X=12.8$ ) ( $p=0.003$ ). Study quality differed significantly ( $p<0.001$ ) by the direction of the association with the outcome of interest, with higher quality scores among studies estimating mixed ( $X=15.4$ ) or beneficial ( $X=15.2$ ) versus null ( $X=14.2$ ) or harmful ( $X=13.1$ ) effects of legal change on the outcome of interest. Study quality did not appear to increase over time (e.g.,  $X=14.0$  in 2014 and  $14.4$  in 2018).

### Study Outcome Measures and Metrics

Across 114 studies we extracted 224 outcome measures, which were coded into 32 metrics (Figure 1). The most common metric employed by studies was the prevalence of use of the decriminalized or legally regulated drug, which was examined in 39.5% of studies ( $n=45$ ) and represented 22.3% of outcome measures ( $n=50$ ). Of these studies, 13 (28.9%; 8 full-length articles and 5 abstracts) did not report any other metric [26–38] and an additional 6 studies (13.3%) reported on the prevalence of use in addition to a single drug-related perception metric (either harmfulness or availability).[39–44] The second most common metric was the frequency of use of the decriminalized or legally regulated drug (14.0% of studies,  $n=16$ ) and the third was the prevalence or frequency of use of tobacco, alcohol, or drugs that remained illegal (12.3% of studies,  $n=14$ ; 9.4% of outcome measures,  $n=21$ ). The fourth most commonly employed metric was any change in the perceived health harmfulness of using the decriminalized or regulated drug (10.5% of studies,  $n=12$ ), which was assessed among adolescents or young adults in all studies except for one that assessed this metric among parents.[45]

All other metrics were assessed in <10% of included studies. Health service utilization was evaluated in 7.9% of studies ( $n=9$ ) using 12 outcome measures, primarily related to emergency department visits and/or hospitalizations. Prescribed (primarily opioid) drug use and perceived availability of the decriminalized or legally regulated drug were reported in 7.0% of studies each ( $n=8$ ). Overdose or poisoning by the decriminalized or regulated drug, and by other drugs (predominantly opioids), were examined in 5.3% ( $n=6$ ) and 6.1% of studies ( $n=7$ ), respectively. Driving while under the influence or with detectable concentrations of the decriminalized or regulated drug (cannabis) was examined in seven studies (6.1%) inclusive of eight outcome

1  
2  
3 measures. Notably, one study assessed self-reported impaired driving,[46] while others assessed  
4 the proportion of fatally injured drivers screening cannabis-positive or the overall prevalence of  
5 driving with detectable THC concentrations in blood. Remaining metrics were measured in less  
6 than 5% of studies (Figure 1). Some pre-specified metrics were not represented in any of the  
7 articles, including infectious disease incidence (e.g., HIV, Hepatitis C), environmental impacts  
8 (e.g., drug production waste, discarded needles), and labor market participation.  
9

### 15 *Studies Outside the U.S.*

16 Of the ten studies conducted outside the U.S., six focused on cannabis decriminalization. All  
17 three studies from Australia examined the prevalence of cannabis use post-  
18 decriminalization,[31,34,47] while one also measured perceived cannabis availability.[47]  
19 Following cannabis decriminalization, one European multi-country study including Belgium and  
20 Portugal examined the prevalence of cannabis use and uptake of cannabis-related addictions  
21 treatment [48] and one Czech study considered the age of first cannabis use.[49] An international  
22 study using United Nations Office on Drugs and Crime data from 102 countries compared  
23 availability, as reflected by cannabis seizures and plant eradication, in countries that had  
24 decriminalized cannabis versus those that had not.[50] Three non-U.S. studies evaluated  
25 decriminalization of all psychoactive drugs. Two studies from Portugal examined health care and  
26 non-health-care costs and psychoactive drug prices, respectively.[51,52] One study from Mexico  
27 examined drug-related criminal justice involvement (arrests) and (violent) crimes.[53] Finally, a  
28 study of historic opium legalization in China (1801-1902) measured the price and availability  
29 (quantity of exports) of opium before and after legalization.[54]  
30  
31  
32  
33  
34  
35  
36  
37  
38  
39  
40  
41  
42

### 43 **Impacts of Decriminalization and Legal Regulation**

44 Results of individual studies are provided in Supplementary Table 1. Supplementary Table 2  
45 tallies findings and average quality scores for each of the metrics; here we summarize findings  
46 for metrics examined in more than 5% of studies, in descending order based on the number of  
47 datapoints. Across all three substance use metrics (prevalence of use, frequency of use, and use  
48 of other alcohol or drugs), drug law reform was most often not associated with use (with null  
49 findings for 48.0-52.4% of outcome measures falling under these metrics). With respect to  
50 change in perceived harmfulness of the decriminalized or regulated drug, mixed results were  
51  
52  
53  
54  
55  
56  
57  
58  
59  
60

1  
2  
3 found in half of cases, with heterogeneity detected on the basis of age, gender, and  
4 state.[39,43,55–57] For example, legal regulation of cannabis for medical use was associated  
5 with greater perceived harmfulness of cannabis among eighth graders but not older students in an  
6 analysis of U.S. Monitoring the Future data [39] while a study employing U.S. National Survey  
7 on Drug Use and Health data found greater perceived harmfulness of cannabis among young  
8 adults aged 18-25 but not adolescents aged 12-17.[57]  
9  
10  
11  
12  
13  
14

15 Among nine studies that employed health service utilization metrics, harmful effects were  
16 reported for six of twelve outcome measures, with increases in emergency department visits  
17 and/or hospitalizations attributed to decriminalization or legal regulation.[58–63] However, all  
18 but one of those studies [58] assessed change over time in one jurisdiction, without a control  
19 group. In contrast, six of nine prescription drug use associations were beneficial, with reductions  
20 observed in rates of opioid [64–68] and other drug prescribing [69,70] attributed to legal  
21 regulation of cannabis for medical use; outcomes in this category came from studies of higher  
22 average quality ( $X=16.3$ ). Perceived availability of the decriminalized or regulated drug  
23 appeared largely unaffected by decriminalization (null associations for five of nine outcome  
24 measures) but two studies indicated increased perceived availability of cannabis among  
25 Colorado, U.S. adolescents following legal regulation for adult use [71] and among adults in  
26 U.S. states with legal regulation for medical use.[44] Across the subset of seven outcome  
27 measures for overdose or poisoning by the decriminalized or regulated drug (cannabis), in all  
28 cases an increase in calls to poison control centers or unintentional pediatric exposures was  
29 reported.[59,72–76] However, studies assessing the impacts of cannabis regulation on overdose  
30 or poisoning by drugs other than cannabis concluded that the effects were either beneficial (four  
31 outcome measures[75,77–79]) or mixed/null (three outcome measures[80–82]). Driving with  
32 detectable concentrations of THC was most often found to increase following decriminalization  
33 or legal regulation (five of eight outcome measures; [83–87]), but these studies were of lower  
34 average quality ( $X=12.0$ ).  
35  
36  
37  
38  
39  
40  
41  
42  
43  
44  
45  
46  
47  
48  
49  
50

### 51 **Impacts of Decriminalization**

52  
53 Of the 19 studies evaluating impacts of decriminalization, six measured the prevalence of  
54 use of the decriminalized substance with eight unique outcome measures. No association was  
55  
56  
57  
58  
59  
60

1  
2  
3 detected for all but three outcomes; following cannabis decriminalization lifetime use increased  
4 among adults in South Australia,[31] while past-month use increased among 12<sup>th</sup> graders but not  
5 younger students in California,[56] relative to the rest of the country in both cases. After peyote  
6 use for ceremonial purposes was decriminalized in the U.S. in 1994, self-reported use increased  
7 among American Indians.[88] Three studies evaluated relationships between decriminalization  
8 and drug-related criminal justice involvement in Mexico and the United States. One high-quality  
9 study found that decriminalization positively influenced criminal justice involvement: in five  
10 U.S. states, arrests for cannabis possession decreased amongst youth and adults.[89] When  
11 possession of small amounts of cannabis was decriminalized in the 1970s in Nebraska, however,  
12 the mean monthly number of arrests did not change, while cannabis-related prosecutions  
13 increased among youth.[90] In Tijuana, Mexico, decriminalization of all drugs had no apparent  
14 impact on the number of drug possession arrests.[53] Two historic and one recent study  
15 measured health care utilization. U.S. states that decriminalized cannabis in the 1970s saw  
16 greater emergency department visits related to cannabis, but decreased visits related to other  
17 drugs.[60] In Colorado, U.S., decriminalization was associated with increased emergency  
18 department visits for cyclic vomiting.[62] Addiction treatment utilization, health care and non-  
19 health-care costs, driving after use, price of drugs, availability of drugs, frequency of use, and  
20 attitudes towards use and perceived harmfulness were each evaluated in only one or two studies  
21 of decriminalization.  
22  
23  
24  
25  
26  
27  
28  
29  
30  
31  
32  
33  
34  
35

## 36 37 **DISCUSSION**

38  
39 This systematic review identified 114 peer-reviewed publications and conference abstracts  
40 evaluating the impacts of drug decriminalization or legal regulation from 1970-2018. Within this  
41 search period, 88.6% were published in 2014 or later. This rapid growth in scholarship was  
42 driven by the implementation and subsequent evaluation of cannabis legalization in a number of  
43 U.S. states beginning in 2012, and knowledge production will surely continue to accelerate as  
44 longer-term data become available and as other jurisdictions (e.g., Canada, Uruguay) analyze the  
45 effects of recently implemented cannabis legalization. The present study provides an overview of  
46 the emerging literature based on our systematic review and suggests three key patterns.  
47  
48  
49  
50  
51  
52  
53  
54  
55  
56  
57  
58  
59  
60

1  
2  
3 First, peer-reviewed evaluations of drug decriminalization and legal regulation are  
4 overwhelmingly geographically concentrated in the U.S. and focused on cannabis legalization.  
5 Importantly, the lack of non-U.S. studies evaluating legal regulation of cannabis for medical use  
6 may reflect the more tightly controlled nature of medical cannabis regulation in other countries,  
7 and thus the more limited potential for population-level effects. It is notable that  
8 decriminalization in the absence of legal regulation was evaluated in only 18 studies (15.8%),  
9 despite being far more common globally than legal regulation. These gaps may hamper  
10 evidence-based drug law reform in countries that are less well-developed, play a substantial role  
11 in drug production and transit, or have different baseline levels of substance (mis)use as  
12 compared to the U.S.  
13  
14  
15  
16  
17  
18  
19  
20  
21

22 Second, prevalence of use was the predominant metric used to assess the impact of drug law  
23 reform, despite its limited clinical significance (e.g., much cannabis use is non-problematic) and  
24 limited responsiveness to drug policy. This is because ecological analyses have indicated little  
25 relationship between drug policies and prevalence of use,[52] as have studies assessing within-  
26 state change in use related to legal regulation.[21] These findings are supported by the  
27 preponderance of evidence synthesized in this review, although some variation is evident in  
28 relation to the specific provisions of legal reforms (e.g., liberal versus tightly regulated medical  
29 markets [91]). Impacts of legal cannabis regulation on prevalence and frequency of use continue  
30 to be evaluated, with recent data suggesting small increases among adults, but not youth.[92]  
31 Drug policies may be more able to influence the types of drugs that people use, drug-related risk  
32 behaviors, and modes of drug consumption.[93] Metrics to assess these outcomes, however, were  
33 lacking in the reviewed literature. For example, only one study (0.8%) investigated whether legal  
34 regulation of cannabis was associated with changes in the mode of cannabis consumption.[71]  
35 Although the prevalence of use was often measured alongside more clinically or socially  
36 significant metrics (e.g., prevalence of substance use disorders, educational outcomes among  
37 young adults), 42.2% of studies assessing substance use prevalence included that metric alone or  
38 in combination with a single drug-related attitude metric.  
39  
40  
41  
42  
43  
44  
45  
46  
47  
48  
49  
50  
51  
52

53 Third, there was a lack of alignment between the stated policy objectives of drug law reform and  
54 the metrics used to assess its impact in the scientific literature. For instance, removal of criminal  
55  
56  
57  
58  
59  
60



1  
2  
3 sanctions to prevent their negative sequelae is a key rationale for decriminalization and legal  
4 regulation,[12,13,94] but only four studies (3.5%) evaluated changes in drug-related criminal  
5 justice involvement following drug law reform. Similarly, improving the physical and mental  
6 health of people who (already) use drugs is a motivation for drug policy reform but no included  
7 studies examined mental or physical health outcomes (aside from substance use disorders) in this  
8 population. As a result, there is a risk that decisions on drug policy may be informed by  
9 inappropriate metrics. Promisingly, in recent months, additional studies assessing legal  
10 regulation that employ a range of criminal justice metrics have been published.[95,96] Finally,  
11 despite ample evidence of the impact of criminalization on infectious disease transmission and  
12 acquisition risks,[5] we found no studies evaluating the impact of decriminalization on these  
13 outcomes.  
14  
15  
16  
17  
18  
19  
20  
21  
22  
23

24 Both the included studies and our systematic review have important strengths and limitations.  
25 To our knowledge, we conducted the first review of all global literature on decriminalization and  
26 legal regulation and applied no language restrictions. All eligible articles identified were  
27 published in English; this may reflect a paucity of evaluation research published in other  
28 languages and/or limitations of our search strategy (e.g., some non-English journals may not be  
29 indexed in the 10 databases searched). In addition, we excluded grey literature, non-original  
30 research, and study designs that are not suited to evaluating policy effects (e.g., cross-sectional  
31 studies), but these restrictions may have narrowed the geographic scope of included studies.  
32 Scoping reviews inclusive of grey literature would be valuable for describing the full range of  
33 evaluations that have been conducted globally. Nevertheless, most included studies used weaker  
34 eligible study designs that are vulnerable to pre-existing trends and confounding; only 22.8% and  
35 5.3% respectively used controlled before-and-after or interrupted time series designs to address  
36 these threats to validity. The use of these study designs may be related to limited resources for  
37 prospective drug policy evaluations, with many studies relying on publicly available, routinely  
38 collected data.  
39  
40  
41  
42  
43  
44  
45  
46  
47  
48  
49  
50

51 This narrative synthesis did not focus on estimating the outcome-specific effects of particular  
52 decriminalization or legal regulation policies but instead sought to characterize the metrics  
53 employed to date. With respect to both the individual studies and our synthesis, the  
54  
55  
56  
57  
58  
59  
60



1  
2  
3 implementation and specific provisions of drug policies vary widely. Decriminalization policies  
4 vary in their definitions of quantities for personal use, application of administrative penalties,  
5 and the extent to which the law “on the books” is reflected in policing and criminal justice  
6 practice. Indeed, in some jurisdictions with nominal decriminalization, arrests for possession of  
7 small quantities of the decriminalized drugs remain routine.[53] Legal regulation models for  
8 cannabis are also heterogenous. For example, policies legally regulating cannabis for medical use  
9 may or may not allow for legal dispensaries, and this provision has been shown to substantially  
10 modify the impact of legal regulation on cannabis use.[97] To the extent that individual studies  
11 employed crude exposure measures (e.g., presence versus absence of a law), they may have  
12 obscured context-dependent effects of drug law liberalization. Further, the impact of drug laws  
13 on drug use and related outcomes may be limited by a lack of public awareness of the details of  
14 local laws.[98]

15  
16  
17 Our use of vote-counting in this synthesis (i.e., categorizing individual outcome measures as  
18 indicating beneficial, harmful, mixed/subgroup-specific, or no statistically significant  
19 associations) is subject to the same limitation. Vote-counting should also be interpreted with  
20 caution in light of the heterogeneity of outcome definitions, the inherent arbitrariness of  
21 statistical significance thresholds, and the key distinction between statistical and clinical  
22 significance. In addition, many included studies are evaluating the same policies (e.g., cannabis  
23 legalization in western U.S. states), sometimes using overlapping data but drawing different  
24 conclusions based on analytic choices and timeframes. The existence of multiple datapoints for a  
25 particular outcome does not imply that the outcome has been well-studied across diverse  
26 contexts such that scientific consensus on its effects has been reached. Moreover, as illustrated  
27 by a recently published extension of the included article by Bachhuber et al.,[78] multiple high-  
28 quality studies may generate results that are later revealed to be spurious as additional follow-up  
29 data become availability. Specifically, Shover et al. demonstrated that the positive association  
30 reported between medical cannabis legalization and opioid overdose mortality in 1999-2010  
31 reversed direction in later years, suggesting that earlier findings of a protective effect should not  
32 be given causal interpretations.[99] This was foreshadowed in the included article by Powell et  
33 al., which found that the purportedly positive effect of medical cannabis legalization was  
34 attenuated in 2010-2013.[82] This scientific back-and-forth can be expected given that most  
35  
36  
37  
38  
39  
40  
41  
42  
43  
44  
45  
46  
47  
48  
49  
50  
51  
52  
53  
54  
55  
56  
57  
58  
59  
60

1  
2  
3 included articles are evaluating legal changes introduced rather recently, and thus are examining  
4 early impacts with limited years of follow-up. Longer-term impacts of non-medical cannabis  
5 legalization, and how they might be influenced by increased commercialization, are yet to be  
6 seen.[100]  
7  
8  
9

## 10 11 12 **Conclusions**

13 The findings of this review indicate a need for a broadening of the metrics used to assess the  
14 impacts of drug decriminalization and legal regulation. Given the growing number of  
15 jurisdictions considering decriminalization or legal regulation of psychoactive drugs,[14–16] the  
16 disproportionate emphasis on metrics assessing drug use prevalence, as well as the limited geo-  
17 cultural diversity in evaluations, are concerning. Experts have called for a more fulsome  
18 approach to evaluating drug policies in line with public health and the United Nations  
19 Sustainable Development Goals, with attention to the full breath of health and social domains  
20 potentially impacted, including human rights and social inclusion (e.g., stigma), peace and  
21 security (e.g., drug market violence), development (e.g., labor market participation) drug market  
22 regulation (e.g., safety of the drug supply), and clinically-significant health metrics (e.g., drug-  
23 related morbidity).[101] Drawing on methods such as multi-criterion decision analysis,[19] the  
24 engagement of both scientists and policymakers in priority-setting may help to produce evidence  
25 that provides a more comprehensive understanding of the breadth of impacts that should be  
26 anticipated with drug law reform efforts. Funding will also be required to support rigorous  
27 prospective evaluations of legal reforms.  
28  
29  
30  
31  
32  
33  
34  
35  
36  
37  
38  
39  
40

### 41 **Figure 1 Legend**

42 Metrics examined by included studies.

### 43 **Figure 2 Legend**

44 PRISMA Flow Diagram

### 45 **Figure 3 Legend**

46 Number of included studies from countries that implemented decriminalization or legal  
47 regulation by 2017  
48  
49  
50  
51  
52  
53  
54  
55  
56  
57  
58  
59  
60

**Note:** Policy changes were classified, following the review inclusion criteria, based on the implementation of a change to national or subnational law to decriminalize drug use and/or possession or to legalize at least one class of drugs. We did not evaluate the extent to which legal changes were reflected in policing and criminal justice practice. Implementation of cannabis legalization for medical purposes only is not reflected in this map.

### **Author contributions**

DW and AIS conceptualized and supervised the review. CZ designed and conducted the literature searches. AIS drafted the manuscript. SC, ZM, and AIS conducted screening and data extraction. NZ contributed to drafting the manuscript and developing figures. All authors contributed to interpretation of findings and revising the manuscript for important intellectual content.

### **Acknowledgements**

The authors would like to thank Gelareh Ghaderi for assistance with screening and data extraction.

### **Funding**

This review was supported by the Canadian Institutes of Health Research (CIHR) via the Canadian Research Initiative on Substance Misuse (SMN-139150), the MAC AIDS Foundation, and the Open Society Foundations. Ayden Scheim was supported by a Canadian Institutes of Health Research Postdoctoral Fellowship. Nazlee Maghsoudi is supported by a CIHR Vanier Canada Graduate Scholarship. Dan Werb is supported by a U.S. National Institute on Drug Abuse Avenir Award (DP2- DA040256), a CIHR New Investigator Award, an Early Researcher Award from the Ontario Ministry of Research, Innovation and Science, and the St. Michael's Hospital Foundation.

### **Competing interests**

We have no competing interests to declare.

### **Data sharing statement**

All relevant data are contained within the article and supplementary materials.

## **REFERENCES**

1. United Nations Office on Drugs and Crime (UNODC). World Drug Report 2019. <https://wdr.unodc.org/wdr2019/index.html>. United Nations publication, Sales No. E.19.XI.9. Published June 2019. Accessed August 28, 2019.

- 1
  - 2
  - 3
  - 4
  - 5
  - 6
  - 7
  - 8
  - 9
  - 10
  - 11
  - 12
  - 13
  - 14
  - 15
  - 16
  - 17
  - 18
  - 19
  - 20
  - 21
  - 22
  - 23
  - 24
  - 25
  - 26
  - 27
  - 28
  - 29
  - 30
  - 31
  - 32
  - 33
  - 34
  - 35
  - 36
  - 37
  - 38
  - 39
  - 40
  - 41
  - 42
  - 43
  - 44
  - 45
  - 46
  - 47
  - 48
  - 49
  - 50
  - 51
  - 52
  - 53
  - 54
  - 55
  - 56
  - 57
  - 58
  - 59
  - 60
2. Degenhardt L, Chiu W-T, Sampson N, et al. Toward a global view of alcohol, tobacco, cannabis, and cocaine use: findings from the WHO World Mental Health Surveys. *PLoS Med* 2008;5(7):e141. doi:10.1371/journal.pmed.0050141
  3. Werb D, Kerr T, Nosyk B, et al. The temporal relationship between drug supply indicators: an audit of international government surveillance systems. *BMJ Open* 2013;3(9):e003077. doi:10.1136/bmjopen-2013-003077
  4. Mathers BM, Degenhardt L, Phillips B, et al. Global epidemiology of injecting drug use and HIV among people who inject drugs: a systematic review. *Lancet* 2008;372(9651):1733–1745. doi:10.1016/S0140-6736(08)61311-2
  5. DeBeck K, Cheng T, Montaner JS, et al. HIV and the criminalisation of drug use among people who inject drugs: a systematic review. *Lancet HIV* 2017;4(8):e357-374 . doi:10.1016/S2352-3018(17)30073-5
  6. Unick GJ, Rosenblum D, Mars S, et al. Intertwined epidemics: national demographic trends in hospitalizations for heroin-and opioid-related overdoses, 1993–2009. *PloS One* 2013;8(2):e54496. doi:10.1371/journal.pone.0054496
  7. Jürgens R, Csete J, Amon JJ, et al. People who use drugs, HIV, and human rights. *Lancet* 2010;376(9739):475–485. doi:10.1016/S0140-6736(10)60830-6
  8. Amon J, Pearshouse R, Cohen J, et al. Compulsory drug detention centers in China, Cambodia, Vietnam, and Laos: health and human rights abuses. *Health Hum Rights* 2013;15(2):124–137.
  9. Werb D, Rowell G, Guyatt G, et al. Effect of drug law enforcement on drug market violence: a systematic review. *Int J Drug Policy* 2011;22(2):87–94. doi:10.1016/j.drugpo.2011.02.002
  10. Csete J, Kamarulzaman A, Kazatchkine M, et al. Public health and international drug policy. *Lancet* 2016;387(10026):1427–1480. doi:10.1016/S0140-6736(16)00619-X
  11. Global Commission on Drug Policy. Taking Control: Pathways to Drug Policies That Work. [https://www.globalcommissionondrugs.org/wp-content/uploads/2016/03/GCDP\\_2014\\_taking-control\\_EN.pdf](https://www.globalcommissionondrugs.org/wp-content/uploads/2016/03/GCDP_2014_taking-control_EN.pdf). Published September 2014. Accessed August 28, 2019.
  12. Wood E, Werb D, Kazatchkine M, et al. Vienna Declaration: a call for evidence-based drug policies. *Lancet* 2010;376(9738):310–312. doi:10.1016/S0140-6736(10)60958-0
  13. United Nations System Chief Executives Board for Coordination (CEB). Summary of Deliberations. <https://www.unsceb.org/CEBPublicFiles/CEB-2018-2-SoD.pdf>. (CEB/2018/2). Published January 18, 2019. Accessed August 28, 2019.
  14. European Monitoring Centre for Drugs and Drug Addiction. Countries. [http://www.emcdda.europa.eu/countries\\_en](http://www.emcdda.europa.eu/countries_en). Accessed August 28, 2019.

15. Tharoor A. Map: Drug Decriminalisation Around the World. <https://www.talkingdrugs.org/decriminalisation>. Published August 23, 2018. Accessed August 28, 2019.
16. Eastwood N, Fox E, Rosmarin A. A Quiet Revolution: Drug Decriminalisation Across the Globe. [https://www.citywide.ie/download/pdf/a\\_quiet\\_revolution\\_decriminalisation\\_across\\_the\\_globe.pdf](https://www.citywide.ie/download/pdf/a_quiet_revolution_decriminalisation_across_the_globe.pdf). Published March 2016. Accessed August 28, 2018.
17. Nutt D, King LA, Saulsbury W, et al. Development of a rational scale to assess the harm of drugs of potential misuse. *Lancet* 2007;369(9566):1047–1053. doi:10.1016/S0140-6736(07)60464-4
18. Nutt DJ, King LA, Phillips LD. Drug harms in the UK: a multicriteria decision analysis. *Lancet* 2010;376(9752):1558–1565. doi:10.1016/S0140-6736(10)61462-6
19. Rogeberg O, Bergsvik D, Phillips LD, et al. A new approach to formulating and appraising drug policy: a multi-criterion decision analysis applied to alcohol and cannabis regulation. *Int J Drug Policy* 2018;56:144–152. doi:10.1016/j.drugpo.2018.01.019
20. Dirisu O, Shickle D, Else H. Influence of legal status on the uptake of cannabis in young people. *Curr Opin Psychiatry* 2016;29:231–5. doi:10.1097/YCO.0000000000000253
21. Sarvet AL, Wall MM, Fink DS, et al. Medical marijuana laws and adolescent marijuana use in the United States: a systematic review and meta-analysis. *Addiction* 2018;113(6):1003–1016. doi:10.1111/add.14136
22. Melchior M, Nakamura A, Bolze C, et al. Does liberalisation of cannabis policy influence levels of use in adolescents and young adults? A systematic review and meta-analysis. *BMJ Open* 2019;9(7):e025880. doi:10.1136/bmjopen-2018-02588023
23. Popay J, Roberts H, Sowden A, et al. Guidance on the Conduct of Narrative Synthesis in Systematic Reviews: A Product from the ESRC Methods Programme, Version 1. <https://www.lancaster.ac.uk/shm/research/nssr/research/dissemination/publications.php>. Published April 2006. Accessed August 28, 2019.
24. Moher D, Liberati A, Tetzlaff J, et al. Preferred Reporting Items for Systematic Reviews and Meta-Analyses: the PRISMA Statement. *PLoS Med* 2009;6(7). doi:10.1371/journal.pmed.1000097
25. Downs SH, Black N. The feasibility of creating a checklist for the assessment of the methodological quality both of randomised and non-randomised studies of health care interventions. *J Epidemiol Community Health* 1998;52(6):377–384.
26. Kerr WC, Lui C, Ye Y. Trends and age, period and cohort effects for marijuana use prevalence in the 1984-2015 US National Alcohol Surveys. *Addiction* 2018;113(3):473–481. doi:10.1111/add.14031

- 1  
2  
3 27. Allshouse AA, Metz TD. Trends in self-reported and urine toxicology (UTOX)-detected  
4 maternal marijuana use before and after legalization. *Am J Obstet Gynecol*  
5 2016;214(1):S444–S445.  
6
- 7  
8 28. Straub H, Drennan KJ, Pflugeisen B. Maternal marijuana use: a natural experiment from  
9 prohibition to access. *Am J Obstet Gynecol* 2017;216 (S1):S554–S555.  
10
- 11 29. Cassidy TA, Green T, Garg P, et al. Up in smoke? Marijuana initiation and prevalence trends  
12 in Colorado: 2008 to 2014. *Drug Alcohol Depend* 2015;156:e39.  
13
- 14 30. Jones JT, Baldwin A, Shu I. A comparison of meconium screening outcomes as an indicator  
15 of the impact of state-level relaxation of marijuana policy. *Drug Alcohol Depend*  
16 2015;156:e104–e105.  
17
- 18 31. Donnelly N, Hall W, Christie P. The effects of the Cannabis Expiation Notice System on the  
19 prevalence of cannabis use in South Australia: evidence from the National Drug Strategy  
20 Household Surveys 1985-95. *Drug Alcohol Rev* 2000;19(3):265–269.  
21  
22
- 23 32. Wall MM, Mauro C, Hasin DS, et al. Prevalence of marijuana use does not differentially  
24 increase among youth after states pass medical marijuana laws: commentary on Stolzenberg  
25 et al. (2015) and reanalysis of US National Survey on Drug Use in Households data 2002-  
26 2011. *Int J Drug Policy* 2016;29:9–13.  
27
- 28 33. Choo EK, Benz M, Zaller N, et al. The impact of state medical marijuana legislation on  
29 adolescent marijuana use. *J Adolesc Health* 2014;55(2):160–166.  
30  
31
- 32 34. Williams J, Bretteville-Jensen AL. Does liberalizing cannabis laws increase cannabis use? *J*  
33 *Health Econ* 2014;36:20–32.  
34
- 35 35. Hasin DS, Wall M, Keyes KM, et al. Medical marijuana laws and adolescent marijuana use  
36 in the USA from 1991 to 2014: results from annual, repeated cross-sectional surveys. *Lancet*  
37 *Psychiatry* 2015;2(7):601–608.  
38
- 39 36. Wagner J, Leonard J, Jensen J, et al. The impact of marijuana legalization on reversible  
40 cerebral vasoconstriction syndrome. *Neurology* 2016;86(S16):115.  
41  
42
- 43 37. Merker AM, Riaz M, Friedman S, et al. Legalization of medicinal marijuana has minimal  
44 impact on use patterns in patients with inflammatory bowel disease. *Inflamm Bowel Dis*  
45 2018;24(11):2309–2314.  
46
- 47 38. Parnes JE, Smith JK, Conner BT. Reefer madness or much ado about nothing? Cannabis  
48 legalization outcomes among young adults in the United States. *Int J Drug Policy*  
49 2018;56:116–120.  
50
- 51 39. Keyes KM, Wall M, Cerda M, et al. How does state marijuana policy affect US youth?  
52 Medical marijuana laws, marijuana use and perceived harmfulness: 1991-2014. *Addiction*  
53 2016;111(12):2187–2195.  
54  
55  
56  
57  
58  
59



- 1
- 2
- 3
- 4 40. Harper S, Strumpf EC, Kaufman JS. Do medical marijuana laws increase marijuana use?  
5 Replication study and extension. *Ann Epidemiol* 2012;22(3):207–212.
- 6
- 7 41. Wall MM, Poh E, Cerda M, et al. Adolescent marijuana use from 2002 to 2008: higher in  
8 states with medical marijuana laws, cause still unclear. *Ann Epidemiol* 2011;21(9):714–716.
- 9
- 10 42. Martins SS, Mauro CM, Santaella-Tenorio J, et al. State-level medical marijuana laws,  
11 marijuana use and perceived availability of marijuana among the general US population.  
12 *Drug Alcohol Depend* 2016;169:26–32.
- 13
- 14 43. Cerda M, Wall M, Feng T, et al. Association of state recreational marijuana laws with  
15 adolescent marijuana use. *JAMA Pediatr* 2017;171(2):142–149.
- 16
- 17 44. Mauro C, Santaella J, Kim JH, et al. Does perceived availability of marijuana explain  
18 changes in marijuana use after medical marijuana law implementation among US adults?  
19 *Drug Alcohol Depend* 2017;171:e134.
- 20
- 21
- 22 45. Kosterman R, Bailey JA, Guttmannova K, et al. Marijuana legalization and parents'  
23 attitudes, use, and parenting in Washington state. *J Adolesc Health* 2016;59(4):450–456.
- 24
- 25 46. Hasin D, Sarvet A, Cerda M, et al. Driving under the influence of alcohol or cannabis in the  
26 U.S., 1991-1992 to 2012-2013: Relationship to state medical marijuana laws. *Alcohol Clin*  
27 *Exp Res* 2017;41:250A.
- 28
- 29
- 30 47. Donnelly N, Hall W, Christie P. The effects of partial decriminalisation on cannabis use in  
31 South Australia, 1985 to 1993. *Aust J Public Health* 1995;19(3):281–287.
- 32
- 33 48. Adam C, Raschzok A. Cannabis policy and the uptake of treatment for cannabis-related  
34 problems. *Drug Alcohol Rev* 2017;36(2):171–177.
- 35
- 36 49. Cervený J, Chomynova P, Mravčík V, et al. Cannabis decriminalization and the age of onset  
37 of cannabis use. *Int J Drug Policy* 2017;43:122–129.
- 38
- 39
- 40 50. Reith I. Two plants are better than one? *Contemp Drug Probl* 2015;42(4):259–273.
- 41
- 42 51. Félix S, Portugal P. Drug decriminalization and the price of illicit drugs. *Int J Drug Policy*  
43 2017;39:121–129.
- 44
- 45 52. Gonçalves R, Lourenço A, da Silva SN. A social cost perspective in the wake of the  
46 Portuguese strategy for the fight against drugs. *Int J Drug Policy* 2015;26(2):199–209.
- 47
- 48 53. Arredondo J, Gaines T, Manian S, et al. The law on the streets: evaluating the impact of  
49 Mexico's drug decriminalization reform on drug possession arrests in Tijuana, Mexico. *Int J*  
50 *Drug Policy* 2018;54:1-8. doi:10.1016/j.drugpo.2017.12.006.
- 51
- 52
- 53 54. Feige C, Miron JA. The opium wars, opium legalization and opium consumption in China.  
54 *Appl Econ Lett* 2008;15(12):911–913.
- 55
- 56
- 57
- 58
- 59



- 1  
2  
3 55. Larimer ME, Lee CM, Kilmer JR, et al. Risk perception, access, and use of marijuana among  
4 young adults following legalization in Washington state. *Alcohol Clin Exp Res*  
5 2015;39:261A.  
6
- 7  
8 56. Miech R, Johnston LA, O'Malley P, et al Trends in use of and attitudes toward marijuana  
9 among youth before and after decriminalization: the case of California 2007-2013. *Drug*  
10 *Alcohol Depend* 2015;156:e151–e152.  
11
- 12 57. Wen H, Hockenberry JM, Druss BG. The effect of medical marijuana laws on marijuana-  
13 related attitude and perception among US adolescents and young adults. *Prev Sci*  
14 2019;20(2):215–223.  
15
- 16 58. Wang GS, Davies SD, Halmo LS, et al. Impact of marijuana legalization in Colorado on  
17 adolescent emergency and urgent care visits. *J Adolesc Health* 2018;63(2):239–241.  
18
- 19 59. Wang GS, Hall K, Vigil D, et al. Marijuana and acute health care contacts in Colorado. *Prev*  
20 *Med* 2017;104:24–30.  
21  
22
- 23 60. Model KE. The effect of marijuana decriminalization on hospital emergency room drug  
24 episodes 1975-1978. *J Am Stat Assoc* 1993;88(423):737–747.  
25
- 26 61. Kim HS, Hall KE, Genco EK, et al. Marijuana tourism and emergency department visits in  
27 Colorado. *N Engl J Med* 2016;374(8):797-798.  
28
- 29 62. Kim HS, Anderson JD, Saghafi O, et al. Cyclic vomiting presentations following marijuana  
30 liberalization in Colorado. *Acad Emerg Med* 2015;22(6):694–699.  
31  
32
- 33 63. Calcaterra SL, Keniston A, Hull ML. The impact of the legalization of recreational marijuana  
34 on a safety-net health system. *J Gen Intern Med* 2018;33(S2):S361.  
35
- 36 64. Wen H, Hockenberry JM. Association of medical and adult-use marijuana laws with opioid  
37 prescribing for Medicaid enrollees. *JAMA Intern Med* 2018;178(5):673–679.  
38
- 39 65. Bradford AC, Bradford WD, Abraham A, et al. Association between US state medical  
40 cannabis laws and opioid prescribing in the Medicare Part D Population. *JAMA Intern Med*  
41 2018;178(5):667–672.  
42  
43
- 44 66. Kim JH, Santaella J, Cerda M, et al. Medical marijuana laws and annual opioid analgesic  
45 sales in the United States. *Drug Alcohol Depend* 2015;156:e111.  
46
- 47 67. Liang D, Bao Y, Wallace M, et al. Medical cannabis legalization and opioid prescriptions:  
48 evidence on US Medicaid enrollees during 1993-2014. *Addiction* 2018;113(11):2060–2070.  
49
- 50 68. Shah AB, Hayes CJ, Lakkad M, et al. Impact of medical marijuana legalization on opioid  
51 use, chronic opioid use and high-risk opioid use. *Value Health* 2018;21(S1):S247.  
52  
53
- 54 69. Bradford AC, Bradford WD. Medical marijuana laws reduce prescription medication use in  
55 Medicare Part D. *Health Aff (Millwood)* 2016;35(7):1230–1236.  
56  
57  
58  
59

- 1
  - 2
  - 3
  - 4
  - 5
  - 6
  - 7
  - 8
  - 9
  - 10
  - 11
  - 12
  - 13
  - 14
  - 15
  - 16
  - 17
  - 18
  - 19
  - 20
  - 21
  - 22
  - 23
  - 24
  - 25
  - 26
  - 27
  - 28
  - 29
  - 30
  - 31
  - 32
  - 33
  - 34
  - 35
  - 36
  - 37
  - 38
  - 39
  - 40
  - 41
  - 42
  - 43
  - 44
  - 45
  - 46
  - 47
  - 48
  - 49
  - 50
  - 51
  - 52
  - 53
  - 54
  - 55
  - 56
  - 57
  - 58
  - 59
  - 60
70. Bradford AC, Bradford WD. Medical marijuana laws may be associated with a decline in the number of prescriptions for Medicaid enrollees. *Health Aff (Millwood)* 2017;36(5):945–951.
71. Harpin SB, Brooks-Russell A, Ma M, et al. Adolescent marijuana use and perceived ease of access before and after recreational marijuana implementation in Colorado. *Subst Use Misuse* 2018;53(3):451–456.
72. Nappe T, Banerji S, Hoyte C. Drug exposure trends since decriminalization of marijuana in Colorado. *Clin Toxicol* 2016;54(8):712–713.
73. Onders B, Casavant MJ, Spiller HA, et al. Marijuana Exposure among children younger than six years in the United States. *Clin Pediatr* 2016;55(5):428–436.
74. Wang GS, Le Lait MC, Deakynne SJ, et al. Unintentional pediatric exposures to marijuana in Colorado, 2009-2015. *JAMA Pediatr* 2016;170(9):e160971.
75. Banerji S, Hoyte C. Marijuana and synthetic cannabinoid patterns in a US state with legalized marijuana: a 5-year NPDS review. *Clin Toxicol* 2017;55 (5):418–419.
76. Bjordal M, Garrard A. The impact of marijuana legalization on poison center calls in the evergreen state. *Clin Toxicol* 2015;53(7):694.
77. Livingston MD, Barnett TE, Delcher C, et al. Recreational cannabis legalization and opioid-related deaths in Colorado, 2000-2015. *Am J Public Health* 2017;107(11):1827–1829.
78. Bachhuber MA, Saloner B, Cunningham CO, et al. Medical cannabis laws and opioid analgesic overdose mortality in the United States, 1999-2010. *JAMA Intern Med* 2014;174(10):1668–1673.
79. Shi Y. Medical marijuana policies and hospitalizations related to marijuana and opioid pain reliever. *Drug Alcohol Depend* 2017;173:144–150.
80. Rohda J, Smith K, Smith L, et al. Impact of recreational marijuana legalization on synthetic cannabinoid use. *Clin Toxicol* 2017;55(7):780.
81. Phillips E, Gazmararian J. Implications of prescription drug monitoring and medical cannabis legislation on opioid overdose mortality. *J Opioid Manag* 2017;13(4):229–239.
82. Powell D, Pacula RL, Jacobson M. Do medical marijuana laws reduce addictions and deaths related to pain killers? *J Health Econ* 2018;58:29–42.
83. Steinemann S, Galanis D, Nguyen T, et al. Motor vehicle crash fatalities and undercompensated care associated with legalization of marijuana. *J Trauma Acute Care Surg* 2018;85(3):566–571.
84. Urfer S, Morton J, Beall V, et al. Analysis of DELTA9-tetrahydrocannabinol driving under the influence of drugs cases in Colorado from January 2011 to February 2014. *J Anal Toxicol* 2014;38(8):575–581.

- 1  
2  
3 85. Pollini RA, Romano E, Johnson MB, et al. The impact of marijuana decriminalization on  
4 California drivers. *Drug Alcohol Depend* 2015;150:135–140.  
5
- 6 86. Ramirez A. Marijuana, other drugs, and alcohol use by drivers in Washington state. *Alcohol*  
7 *Clin Exp Res* 2017;41:314A.  
8
- 9 87. Couper FJ, Peterson BL. The prevalence of marijuana in suspected impaired driving cases in  
10 Washington state. *J Anal Toxicol* 2014;38(8):569–574.  
11
- 12 88. Prue B. Prevalence of reported peyote use 1985-2010 effects of the American Indian  
13 Religious Freedom Act of 1994. *Am J Addict* 2014;23(2):156–161.  
14
- 15 89. Grucza RA, Vuolo M, Krauss MJ, et al. Cannabis decriminalization: A study of recent policy  
16 change in five U.S. states. *Int J Drug Policy* 2018;59:67–75.  
17
- 18 90. Suggs DL. A qualitative and quantitative analysis of the impact of Nebraska's  
19 decriminalization of marijuana. *Law Hum Behav* 1981;5(1):45–71.  
20
- 21 91. Leung J, Chiu CYV, Stjepanović D, et al. Has the legalisation of medical and recreational  
22 cannabis use in the USA affected the prevalence of cannabis use and cannabis use disorders?  
23 *Curr Addict Rep* 2018;5:403–17.  
24
- 25 92. Cerdá M, Mauro C, Hamilton A, et al. Association between recreational marijuana  
26 legalization in the United States and changes in marijuana use and cannabis use disorder  
27 from 2008 to 2016. *JAMA Psychiatry* 2020;77:165–71.  
28 doi:10.1001/jamapsychiatry.2019.3254  
29
- 30 93. Kerr T, Small W, Wood E. The public health and social impacts of drug market enforcement:  
31 a review of the evidence. *Int J Drug Policy* 2005;(16):210-220.  
32
- 33 94. McGinty EE, Samples H, Bandara SN, et al. The emerging public discourse on state  
34 legalization of marijuana for recreational use in the US: analysis of news media coverage,  
35 2010–2014. *Prev Med* 2016;90:114–120. doi:https://doi.org/10.1016/j.ypmed.2016.06.040  
36
- 37 95. Firth CL, Maher JE, Dilley JA, et al. Did marijuana legalization in Washington state reduce  
38 racial disparities in adult marijuana arrests? *Subst Use Misuse* 2019;54(9):1582-1587.  
39 doi:10.1080/10826084.2019.1593007  
40
- 41 96. Plunk AD, Peglow SL, Harrell PT, et al. Youth and adult arrests for cannabis possession  
42 after decriminalization and legalization of cannabis. *JAMA Pediatr* 2019;173(8):763–769.  
43 doi:10.1001/jamapediatrics.2019.1539  
44
- 45 97. Pacula RL, Powell D, Heaton P, et al. Assessing the effects of medical marijuana laws on  
46 marijuana use: the devil is in the details. *J Policy Anal Manage* 2015;34(1):7–31.  
47
- 48 98. MacCoun R, Pacula RL, Chiqui J, et al. Do citizens know whether their state has  
49 decriminalized marijuana? Assessing the perceptual component of deterrence theory. *Rev*  
50 *Law Econ* 2009;5:347–71.  
51  
52  
53  
54  
55  
56  
57  
58  
59

- 1  
2  
3 99. Shover CL, Davis CS, Gordon S, et al. Association between medical cannabis laws and  
4 opioid overdose mortality has reversed over time. *PNAS* 2019;116(26):12624-12626.  
5 doi:10.1073/pnas.1903434116/  
6  
7  
8 100. Hall W, Stjepanović D, Caulkins J, et al. Public health implications of legalising the  
9 production and sale of cannabis for medicinal and recreational use. *The Lancet*  
10 2019;394:1580–90. doi:10.1016/S0140-6736(19)31789-1  
11  
12 101. International Expert Group on Drug Policy Metrics. Aligning Agendas: Drugs, Sustainable  
13 Development, and the Drive for Policy Coherence. [https://www.ipinst.org/wp-](https://www.ipinst.org/wp-content/uploads/2018/02/1802_Aligning-Agendas.pdf)  
14 [content/uploads/2018/02/1802\\_Aligning-Agendas.pdf](https://www.ipinst.org/wp-content/uploads/2018/02/1802_Aligning-Agendas.pdf). Published February 2018. Accessed  
15 August 28, 2019.  
16  
17  
18  
19  
20  
21  
22  
23  
24  
25  
26  
27  
28  
29  
30  
31  
32  
33  
34  
35  
36  
37  
38  
39  
40  
41  
42  
43  
44  
45  
46  
47  
48  
49  
50  
51  
52  
53  
54  
55  
56  
57  
58  
59  
60

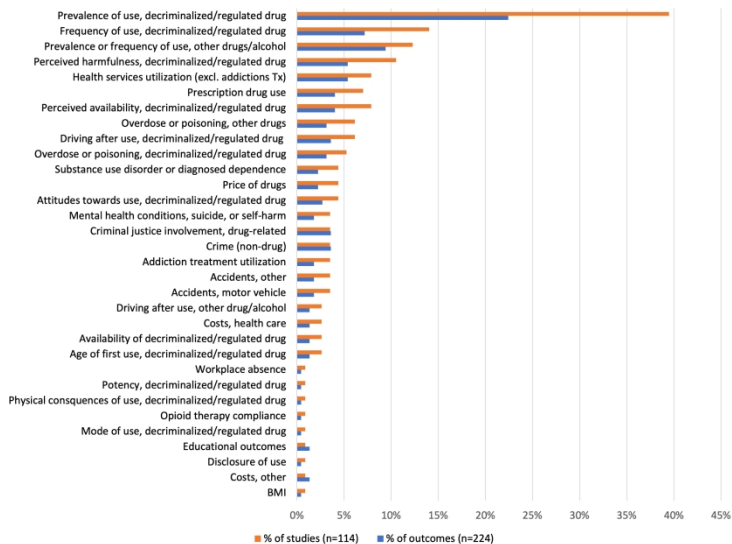

Metrics examined by included studies.

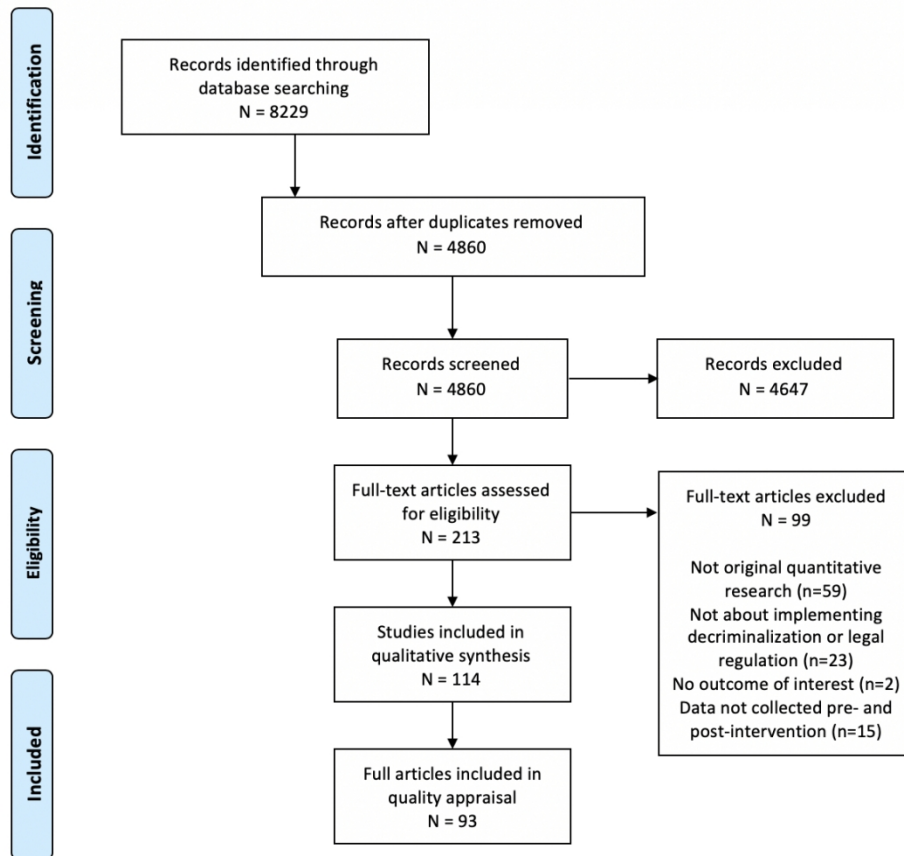

PRISMA Flow Diagram

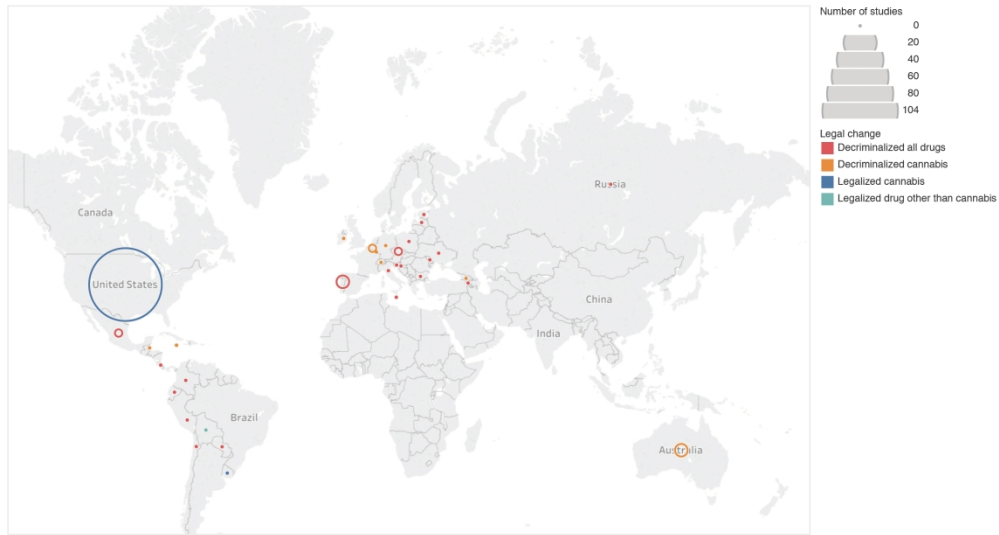

Number of included studies from countries that implemented decriminalization or legal regulation by 2017  
 Note: Policy changes were classified, following the review inclusion criteria, based on the implementation of a change to national or subnational law to decriminalize drug use and/or possession or to legalize at least one class of drugs. We did not evaluate the extent to which legal changes were reflected in policing and criminal justice practice. Implementation of cannabis legalization for medical purposes only is not reflected in this map.



Supplementary Table 1. Included Studies

|    | Reference         | Setting<br>Legal change                                                               | Study design,<br>dates<br>[Comparison<br>group or<br>condition]                                                                            | Sampling<br>approach<br>Sample size                                                                                         | Outcomes                                                                                                                                                                                                                                                                     | Effects                                                                                                                                                                                                                                                                                                                                                                                                                                                                                                                                                                                            | Quality |
|----|-------------------|---------------------------------------------------------------------------------------|--------------------------------------------------------------------------------------------------------------------------------------------|-----------------------------------------------------------------------------------------------------------------------------|------------------------------------------------------------------------------------------------------------------------------------------------------------------------------------------------------------------------------------------------------------------------------|----------------------------------------------------------------------------------------------------------------------------------------------------------------------------------------------------------------------------------------------------------------------------------------------------------------------------------------------------------------------------------------------------------------------------------------------------------------------------------------------------------------------------------------------------------------------------------------------------|---------|
| 1. | Adam 2017         | Belgium,<br>Portugal<br><br>Cannabis<br>decriminalization                             | Controlled<br>before-and-<br>after, 1996-2010<br><br>[Austria,<br>Germany,<br>Greece, Ireland,<br>Italy,<br>Netherlands,<br>Spain, Sweden] | Convenience<br>sampling<br><br>89 treatment<br>units                                                                        | <i>Addiction treatment<br/>utilization</i> : # of first-time drug<br>treatment clients reporting<br>cannabis as primary<br>indication, per reporting<br>treatment unit<br><br><i>Prevalence of use,<br/>decriminalized/regulated<br/>drug(s)</i> : past-year cannabis<br>use | No significant effect of<br>decriminalization. $B = 2.66$ , $SE=8.72$ ,<br>$P=0.770$<br><br>No significant effect of<br>decriminalization. $B = 1.88$ , $SE=1.77$ ,<br>$P=0.310$                                                                                                                                                                                                                                                                                                                                                                                                                   | 13      |
| 2. | Allshouse<br>2016 | United States<br><br>Legal regulation<br>of cannabis for<br>recreational use<br>(RCL) | Repeated cross-<br>sectional study,<br>2013; 2014                                                                                          | Population-<br>based;<br>Admin<br>record data<br><br>N=743                                                                  | <i>Prevalence of use,<br/>decriminalized/regulated<br/>drug(s)</i> : self-reported cannabis<br>use during pregnancy<br><br><i>Prevalence of use,<br/>decriminalized/regulated<br/>drug(s)</i> : cannabis-positive<br>urine screen during pregnancy                           | No significant effect of RCL (from 4.5%<br>to<br>7.5%, $p=0.06$ )<br><br>No significant effect of RCL. Adjusted<br>prevalence difference = 0.03, $P=0.99$ .                                                                                                                                                                                                                                                                                                                                                                                                                                        | A<br>*  |
| 3. | Anderson<br>2013  | United States<br><br>Legal regulation<br>of cannabis for<br>medical use<br>(MCL)      | Repeated cross-<br>sectional study,<br>1990-2010                                                                                           | Convenience<br>sampling<br><br><i>Study A</i> :<br>8,271<br>cannabis<br>purchases<br><i>Study B</i> :<br>1071<br>fatalities | <i>Price of drugs</i> : median price<br>of cannabis in state and year<br><br><i>Accidents, motor vehicle</i> :<br>traffic fatality outcomes per<br>100,000; primary outcome is<br>total fatalities.                                                                          | 9.8% decrease in price of high-quality<br>cannabis, controlling for state-specific<br>time trends. Lagged models indicate<br>price reductions not significant until 4 <sup>th</sup><br>year after MCL. Effects on price of low-<br>quality cannabis largely statistically<br>insignificant.<br><br>No significant change in fatalities,<br>controlling for state-specific time trends.<br>In lagged models, MCL associated with<br>8-13% fatality reductions in years 1-4,<br>with reduction attenuated and no longer<br>significant after 5 years, controlling for<br>state-specific time trends. | 11      |

|    |                |                                                                     |                                                                                         |                                                                   |                                                                                                                                          |                                                                                                                                                                                                       |    |
|----|----------------|---------------------------------------------------------------------|-----------------------------------------------------------------------------------------|-------------------------------------------------------------------|------------------------------------------------------------------------------------------------------------------------------------------|-------------------------------------------------------------------------------------------------------------------------------------------------------------------------------------------------------|----|
| 4. | Anderson 2014  | United States<br>Legal regulation of cannabis for medical use (MCL) | Controlled before-and-after study, 1990-2007<br><br>[States that did not implement MCL] | Population-based;<br>Admin record data                            | <i>Mental health conditions, suicide, or self-harm</i> : annual suicide rates per 100,000 among individuals 15+                          | No difference in suicide rate overall. Reduction among males, (log) rate difference = -0.047* (95% CI: -0.089, -0.005). By age, significant reductions among males from 20-39 and among females >=60. | 16 |
| 5. | Anderson 2018  | United States<br>Legal regulation of cannabis for medical use (MCL) | Repeated cross-sectional study, 1992-2015                                               | Population-based;<br>Admin record data<br><br>N= 1224 state-years | <i>Accidents, other</i> : Workplace fatalities by state from the Bureau of Labor Statistics                                              | No difference in fatality rate overall. Reduction among those aged 25-44 only. Adjusted rate ratio = 0.805 (95% CI: 0.662, 0.979).                                                                    | 15 |
| 6. | Anderson 2015  | United States<br>Legal regulation of cannabis for medical use (MCL) | Repeated cross-sectional study, 1993-2011                                               | Population-based;<br>School-based survey<br><br>N=862,695         | <i>Prevalence of use, decriminalized/regulated drug(s)</i> : past 30 day use                                                             | No significant effect of MCL: % difference, combined national and state YRBS = -0.007, SE=0.011, p>0.05.                                                                                              | 15 |
|    |                |                                                                     |                                                                                         |                                                                   | <i>Frequency of use, decriminalized/regulated drug(s)</i> : used ≥ 10 times in past 30 days                                              | No significant effect of MCL: % difference, combined national and state YRBS = -0.004, SE=0.006, p>0.05.                                                                                              |    |
|    |                |                                                                     |                                                                                         |                                                                   | <i>Actual availability of decriminalized/regulated drug(s)</i> : offered, sold, or given an illegal drug on school property in past year | MCL associated with reduction in availability, % difference, combined national and state YRBS = -0.020, SE=0.008, p<0.05;                                                                             |    |
| 7. | Arredondo 2018 | Mexico<br>Decriminalization of all drugs                            | Repeated cross-sectional study, 2009-2014                                               | Population-based;<br>Admin record data                            | <i>Criminal justice involvement</i> : Monthly number of drug possession arrests per precinct.                                            | Decriminalization law not associated with arrests, Beta for ln(possession arrests)=0.187, SE=0.151, p>0.05.                                                                                           | 14 |
|    |                |                                                                     |                                                                                         |                                                                   | <i>Crime (non-drug)</i> : Violent crime arrests (injuries, robbery, homicides)                                                           | Law not associated with arrests, b=0.001, SE=0.090, p>0.05.                                                                                                                                           |    |

|     |                |                                                                                              |                                                                                           |                                                               |                                                                                                                                                                                                            |                                                                                                                                                                                             |     |
|-----|----------------|----------------------------------------------------------------------------------------------|-------------------------------------------------------------------------------------------|---------------------------------------------------------------|------------------------------------------------------------------------------------------------------------------------------------------------------------------------------------------------------------|---------------------------------------------------------------------------------------------------------------------------------------------------------------------------------------------|-----|
|     |                |                                                                                              |                                                                                           |                                                               | <i>Crime (non-drug):</i><br>Non-violent arrests (theft, possession of stolen car)                                                                                                                          | Law not associated with arrests, $b=-0.043$ , $SE=0.071$ , $p>0.05$ .                                                                                                                       |     |
| 8.  | Aydelotte 2017 | United States<br><br>Legal regulation of cannabis for recreational use (RCL)                 | Controlled before-and-after study, 2009-2015<br><br>[8 similar states without MCL or RCL] | Population-based;<br>Admin record data<br><br>N=60,737        | <i>Accidents, motor vehicle:</i><br>Annual number of motor vehicle crash fatalities                                                                                                                        | RCL not associated with crash fatalities, adjusted difference in difference coefficient: +0.2 (95% CI: -0.4, +0.9).                                                                         | 15  |
| 9.  | Bachhuber 2014 | United States<br><br>Legal regulation of cannabis for medical use (MCL)                      | Interrupted time series study, 1999-2010                                                  | Population-based;<br>Admin record data                        | <i>Overdose or poisoning, other drug:</i> opioid analgesic overdose mortality rate                                                                                                                         | MCL associated with reduced mortality, adjusted percentage change in annual rate= -24.8% (95% CI: -37.5, -9.5), $p = .003$ .                                                                | 16  |
| 10. | Banerji 2017   | United States<br><br>Legal regulation of cannabis for recreational use                       | Repeated cross-sectional study, 2011-2015                                                 | Population-based;<br>Admin record data<br><br>N=777 exposures | <i>Overdose or poisoning, decriminalized/regulated drug:</i> cannabis calls to poison control center<br><br><i>Overdose or poisoning, other drug:</i> synthetic cannabinoid calls to poison control center | Apparent increase (from 86 in 2011 to 231 in 2015); no statistical tests reported.<br><br>Apparent decrease (100 in 2013 and 17 in 2014); no statistical tests reported.                    | A * |
| 11. | Bell 2015      | United States<br><br>Legal regulation of cannabis for medical use (MCL) and recreational use | Repeated cross-sectional study, 2008-2014                                                 | Population-based;<br>Admin record data<br>N=29                | <i>Accidents, other:</i><br>hydrocarbon burns referred to the University of Colorado Hospital                                                                                                              | Before MCL (Jan 2008-Aug 2009): 0 cases<br>During MCL (Oct 2009-Dec 2013): 19 cases<br>During recreational legalization (Dec 2013-Aug 2014): 12 cases<br><br>No statistical tests reported. | 11  |
| 12. | Bjordal 2015   | United States<br><br>Legal regulation of cannabis for recreational use                       | Repeated cross-sectional study, 2013-2014                                                 | Population-based;<br>Admin record data<br><br>N=245 exposures | <i>Overdose or poisoning, decriminalized/regulated drug:</i> Cannabis calls to poison control center (p.694)                                                                                               | Apparent increase (from 158 in 2013 to 245 in 2014); no statistical tests reported.                                                                                                         | A * |

|     |               |                                                                     |                                                                                                              |                                                                                            |                                                                                                                                                                                                                                                                                                                                                                                                             |                                                                                                                                                                                                                                                                                                                                                                        |    |
|-----|---------------|---------------------------------------------------------------------|--------------------------------------------------------------------------------------------------------------|--------------------------------------------------------------------------------------------|-------------------------------------------------------------------------------------------------------------------------------------------------------------------------------------------------------------------------------------------------------------------------------------------------------------------------------------------------------------------------------------------------------------|------------------------------------------------------------------------------------------------------------------------------------------------------------------------------------------------------------------------------------------------------------------------------------------------------------------------------------------------------------------------|----|
| 13. | Blachly 1976  | United States<br>Cannabis decriminalization                         | Uncontrolled before-and-after study, 1970; 1975                                                              | Convenience sampling<br>N=627 admissions                                                   | <i>Health services utilization:</i> % of drug abuse admissions to Dammasch State Hospital due to cannabis                                                                                                                                                                                                                                                                                                   | Prevalence from 6.7% (1970) to 2.5% (1975); no statistical tests reported.                                                                                                                                                                                                                                                                                             | 8  |
| 14. | Boyle 2014    | United States<br>Cannabis decriminalization                         | Repeated cross-sectional study, 2011-2013                                                                    | Population-based;<br>Admin record data<br>N=11 incidents                                   | <i>Accidents, other:</i> explosions of gases related to hash oil manufacturing                                                                                                                                                                                                                                                                                                                              | Two events in 2 years prior, nine events in 7 months post-decriminalization (before legal sales); no statistical tests reported.                                                                                                                                                                                                                                       | A* |
| 15. | Bradford 2018 | United States<br>Legal regulation of cannabis for medical use (MCL) | Repeated cross-sectional study, 2010-2015                                                                    | Population-based;<br>Admin record data<br>N=132.6 million physician-drug-year observations | <i>Prescription drug use:</i> total number of daily opioid dose prescriptions filled (in millions)                                                                                                                                                                                                                                                                                                          | MCL associated with fewer daily doses filled in states with active dispensaries (-3.742 million, 95% CI: -6.289, -1.194) and in states with home cultivation (-1.792 million, 95% CI: -3.532, -0.052). Results also varied by type of opioid.                                                                                                                          | 18 |
| 16. | Bradford 2016 | United States<br>Legal regulation of cannabis for medical use (MCL) | Controlled before-and-after study, 2010-2013<br><br>[States without a medical marijuana law at a given time] | Population-based;<br>Admin record data<br>N= 588,808-2,496,608                             | <i>Prescription drug use:</i> among Medicaid Part D enrollees, average daily doses filled annually per physician for FDA-approved drugs treating conditions that cannabis may be used to treat (anxiety, depression, glaucoma, nausea, pain, psychosis, seizures, sleep disorders, spasticity)<br><br><i>Costs, health care:</i> estimated annual change in Medicaid Part D spending (program and enrollee) | MCL associated with statistically significant ( $p<0.05$ ) reductions in daily doses filled for 7 of 9 conditions (difference-in-difference coefficients from -265 daily doses for depression to -1826 for pain), no significant effects for glaucoma or spasticity.<br><br>Estimated prescription drug cost savings from 2010-2013 attributed to MCL = \$515,194,125. | 17 |

|     |                            |                                                                                  |                                                                                                            |                                                                                                      |                                                                                                                                                                                                                                      |                                                                                                                                                                                                                                                                                                     |    |
|-----|----------------------------|----------------------------------------------------------------------------------|------------------------------------------------------------------------------------------------------------|------------------------------------------------------------------------------------------------------|--------------------------------------------------------------------------------------------------------------------------------------------------------------------------------------------------------------------------------------|-----------------------------------------------------------------------------------------------------------------------------------------------------------------------------------------------------------------------------------------------------------------------------------------------------|----|
| 17. | Bradford<br>2017           | United States<br><br>Legal regulation<br>of cannabis for<br>medical use<br>(MCL) | Controlled<br>before-and-after<br>study,<br>2007-2014<br><br>[States without<br>MCL in a given<br>quarter] | Population-<br>based;<br>Admin<br>record data                                                        | <i>Prescription drug use:</i><br>average number of daily<br>prescription drug doses<br>dispensed per fee-for-service<br>Medicaid beneficiary for<br>FDA-approved drugs treating<br>conditions that cannabis may<br>be used to treat. | MCL associated with statistically<br>significant ( $p<0.05$ ) reductions in daily<br>doses per beneficiary for 5 of 9<br>conditions (depression, nausea, pain,<br>psychosis, and seizures). Estimated<br>proportion reductions in dispensed doses<br>ranged from 11% for pain to 17% for<br>nausea. | 17 |
|     |                            |                                                                                  |                                                                                                            |                                                                                                      | <i>Costs, health care:</i> estimated<br>annual change in Medicaid<br>fee-for-service spending on<br>prescription drugs with<br>medical cannabis indications                                                                          | Estimated Medicaid fee-for-service<br>prescription drug cost savings from<br>2007-2014 attributed to MCL = 2,694.1<br>million                                                                                                                                                                       |    |
| 18. | Brooks-<br>Russell<br>2019 | United States<br><br>Legal regulation<br>of cannabis for<br>recreational use     | Repeated cross-<br>sectional study,<br>2013-2015                                                           | Population-<br>based;<br>School-<br>based survey<br><br>N = 26,019<br>(2013)<br>N = 15,970<br>(2015) | <i>Prevalence of use,<br/>decriminalized/regulated<br/>drug(s):</i> lifetime use; past 30-<br>day use.                                                                                                                               | No significant change in lifetime or past<br>30-day use following legal regulation.                                                                                                                                                                                                                 | 15 |
|     |                            |                                                                                  |                                                                                                            |                                                                                                      | <i>Prevalence of use, other drugs<br/>or alcohol:</i> past 30-day use of<br>cigarettes; past 30-day use<br>alcohol; lifetime non-medical<br>prescription drug use; lifetime<br>cocaine use.                                          | Decrease in past 30-day cigarette use<br>from 2013 to 2015 (12.1 to 8.6%,<br>$p<0.01$ ). No significant changes in other<br>drug or alcohol use.                                                                                                                                                    |    |
|     |                            |                                                                                  |                                                                                                            |                                                                                                      | <i>Perceived harmfulness of<br/>decriminalized/regulated<br/>drug(s):</i> high vs. low<br>perceived accessibility,<br>wrongfulness, parental<br>disapproval,<br>and harmfulness.                                                     | Decrease in high perceived harmfulness<br>(52.9% to 47.7%, $p<0.01$ ). No significant<br>changes in other perceptions.                                                                                                                                                                              |    |
|     |                            |                                                                                  |                                                                                                            |                                                                                                      | <i>Frequency of use,<br/>decriminalized/legalized<br/>drug(s):</i> >20 occasions of use<br>in past 30 days, among those<br>who reported past 30-day use.                                                                             | Decrease in frequent use among past-30-<br>day users (33.2% to 26.8%, $p<0.01$ ).                                                                                                                                                                                                                   |    |
|     |                            |                                                                                  |                                                                                                            |                                                                                                      | <i>Prevalence of use,<br/>decriminalized/regulated<br/>drug(s):</i> use on school<br>property, among those who<br>reported past 30-day use.                                                                                          | Decrease in use on school property<br>among past-30-day users (5.7% to 4.4%,<br>$p=0.03$ ).                                                                                                                                                                                                         |    |

|     |                 |                                                                          |                                                                          |                                                             |                                                                                                   |                                                                                                                                                                                                                                                                                                                                                           |     |
|-----|-----------------|--------------------------------------------------------------------------|--------------------------------------------------------------------------|-------------------------------------------------------------|---------------------------------------------------------------------------------------------------|-----------------------------------------------------------------------------------------------------------------------------------------------------------------------------------------------------------------------------------------------------------------------------------------------------------------------------------------------------------|-----|
| 19. | Calcaterra 2018 | United States<br>Legal regulation of cannabis for recreational use (RCL) | Interrupted time series study, 2009-2015                                 | Population-based;<br>Admin record data<br><br>N=370,612     | <i>Health services utilization: cannabis-related hospitalizations</i>                             | RCL associated with an increase in hospitalizations: adjusted annual rates of inpatient and emergent hospitalizations were 2.4 and 4.3 times higher in 2015 as compared to 2009 ( $p<0.001$ ). A reduced segmented regression model shows a significant increase in slope post-RCL ( $b= 1.835$ , $SE=0.218$ , $p< 0.0001$ ).                             | A * |
| 20. | Cassidy 2015    | United States<br>Legal regulation of cannabis for recreational use       | Uncontrolled before-and-after study, 2008-2014                           | Convenience sampling<br><br>N=13,945                        | <i>Prevalence of use, decriminalized/regulated drug(s): among substance use treatment clients</i> | Increase from 21.3% in 2008 to 32.8% in 2014 ( $p<0.001$ ).                                                                                                                                                                                                                                                                                               | A * |
|     |                 |                                                                          |                                                                          |                                                             | <i>Prevalence of use, decriminalized/regulated drug(s): past-year initiation</i>                  | No significant change in past-year initiation.                                                                                                                                                                                                                                                                                                            |     |
| 21. | Cerde 2018      | United States<br>Legal regulation of cannabis for medical use (MCL)      | Controlled before-and-after study, 1991-2015<br><br>[States without MCL] | Population-based;<br>School-based survey<br><br>N=1,179,372 | <i>Prevalence of use, decriminalized/regulated drug(s): past 30-day use</i>                       | Decrease in 8 <sup>th</sup> grade (aOR=0.72; 95% CI: 0.62, 0.84). No significant changes in 10 <sup>th</sup> or 12 <sup>th</sup> .                                                                                                                                                                                                                        | 18  |
|     |                 |                                                                          |                                                                          |                                                             | <i>Prevalence of use, other drugs or alcohol: binge drinking in past two weeks</i>                | Decrease in 8 <sup>th</sup> grade (aOR=0.72; 95% CI: 0.65, 0.79). No significant changes in 10 <sup>th</sup> or 12 <sup>th</sup> .                                                                                                                                                                                                                        |     |
|     |                 |                                                                          |                                                                          |                                                             | <i>Prevalence of use, other drugs or alcohol: past 30-day cigarette use</i>                       | Decrease in 8 <sup>th</sup> grade (aOR=0.74; 95% CI: 0.66, 0.82) and increase in 12 <sup>th</sup> grade (aOR=1.17; 95% CI: 1.06, 1.29).                                                                                                                                                                                                                   |     |
|     |                 |                                                                          |                                                                          |                                                             | <i>Prevalence of use, other drugs or alcohol: past 30-day non-medical prescription drug use</i>   | Decrease in non-medical prescription opioid use in 8 <sup>th</sup> grade (aOR=0.43; 95% CI: 0.36, 0.52) and increase in 12 <sup>th</sup> grade (aOR=1.42; 95% CI: 1.21, 1.66).<br>Decrease in prescription amphetamine use (aOR=0.71; 95% CI: 0.63, 0.81) and prescription tranquilizer use (aOR=0.83; 95% CI: 0.71, 0.98) in 8 <sup>th</sup> grade only. |     |
|     |                 |                                                                          |                                                                          |                                                             | <i>Prevalence of use, other drugs or alcohol: past 30-day non-cannabis illicit drug use</i>       | Decrease in 8 <sup>th</sup> grade only (aOR=0.77; 95% CI: 0.69, 0.86).                                                                                                                                                                                                                                                                                    |     |

|     |              |                                                                              |                                                                                                            |                                                                   |                                                                                                                                               |                                                                                                                                                                                                                                     |    |
|-----|--------------|------------------------------------------------------------------------------|------------------------------------------------------------------------------------------------------------|-------------------------------------------------------------------|-----------------------------------------------------------------------------------------------------------------------------------------------|-------------------------------------------------------------------------------------------------------------------------------------------------------------------------------------------------------------------------------------|----|
| 22. | Cerda 2017   | United States<br><br>Legal regulation of cannabis for recreational use (RCL) | Controlled before-and-after study, 2010-2015                                                               | Population-based;<br>School-based survey<br><br>N=253,902         | <i>Prevalence of use, decriminalized/regulated drug(s):</i> past 30-day use                                                                   | Increase in 8 <sup>th</sup> and 10 <sup>th</sup> grade in Washington but not Colorado (difference-in-difference WA vs. non-RCL= 3.2% in 8 <sup>th</sup> grade, p=0.03; 5.0% in 10 <sup>th</sup> , p=0.01).                          | 18 |
|     |              |                                                                              |                                                                                                            |                                                                   | <i>Perceived harmfulness of decriminalized/regulated drug(s):</i> great or moderate vs. low or no risk                                        | Decreased perceived harmfulness in 8 <sup>th</sup> and 10 <sup>th</sup> grade in Washington but not Colorado (difference-in-difference WA vs. non-RCL= -9.3% in 8 <sup>th</sup> grade, p=0.01; -9.0% in 10 <sup>th</sup> , p=0.02). |    |
| 23. | Cerveny 2017 | Czech Republic<br><br>Cannabis decriminalization                             | Repeated cross-sectional study, 2008; 2012                                                                 | Population-based;<br>Household survey<br>N=1524                   | <i>Age of first use, decriminalized/regulated drug</i>                                                                                        | No significant effect of decriminalization on hazard of initiation.                                                                                                                                                                 | 13 |
| 24. | Choo 2014    | United States<br><br>Legal regulation of cannabis for medical use (MCL)      | Controlled before-and-after study, 1991-2011<br><br>[Matched to state in geographic proximity without MCL] | Population-based;<br>School-based survey<br><br>N=11,703,100      | <i>Prevalence of use, decriminalized/regulated drug(s):</i> past 30-day use                                                                   | No significant effect of MCL.                                                                                                                                                                                                       | 16 |
| 25. | Chu 2014     | United States<br><br>Legal regulation of cannabis for medical use (MCL)      | Controlled before-and-after study, 1988-2008<br><br>[Non-MCL state years]                                  | Population-based;<br>Admin record data<br><br>N=12,157 city-years | <i>Criminal justice involvement:</i> adult male cannabis possession arrest rates                                                              | No significant effect of MCL.                                                                                                                                                                                                       | 15 |
|     |              |                                                                              |                                                                                                            |                                                                   | <i>Criminal justice involvement:</i> ratio of cannabis possession arrests to all arrests among adult males                                    | MCL associated with 9.3-12.1% increase in ratio of cannabis to non-cannabis arrests.                                                                                                                                                |    |
|     |              |                                                                              |                                                                                                            |                                                                   | <i>Addiction treatment utilization:</i> ratio of cannabis-related to all treatment admissions among adult male non-criminal justice referrals | MCL associated with 9.1-10.5% increase in ratio of cannabis to non-cannabis admissions.                                                                                                                                             |    |



|     |               |                                                                     |                                                              |                                                                   |                                                                                                                                                                                                                |                                                                                                                                                                                    |    |
|-----|---------------|---------------------------------------------------------------------|--------------------------------------------------------------|-------------------------------------------------------------------|----------------------------------------------------------------------------------------------------------------------------------------------------------------------------------------------------------------|------------------------------------------------------------------------------------------------------------------------------------------------------------------------------------|----|
| 26. | Couper 2014   | United States<br>Cannabis decriminalization                         | Repeated cross-sectional study, 2009-2013                    | Convenience sampling<br>N=25,719                                  | <i>Driving under the influence or with detectable concentration, decriminalized/regulated drug(s):</i> prevalence of THC in blood toxicology results from suspected impaired driving cases in Washington State | Increased prevalence of active THC after decriminalization (24.9% vs. 19.1%, $p<0.05$ ).                                                                                           | 9  |
| 27. | Donnelly 1995 | Australia<br>Cannabis decriminalization                             | Repeated cross-sectional study, 1985-1993                    | Population-based;<br>Household survey<br><br>N= 2257 to 3500      | <i>Prevalence of use, decriminalized/regulated drug(s):</i> lifetime cannabis use                                                                                                                              | No significant interaction between survey year and state: lifetime use did not increase at a significantly greater rate in South Australia (decriminalized).                       | 15 |
|     |               |                                                                     |                                                              |                                                                   | <i>Perceived availability of decriminalized/regulated drug(s):</i> been offered cannabis                                                                                                                       | No significant interaction between survey year and state.                                                                                                                          |    |
|     |               |                                                                     |                                                              |                                                                   | <i>Attitudes towards use, decriminalized/regulated drug(s):</i> would take cannabis if offered by a trusted friend                                                                                             | Proportion reporting willingness to try increased from 10% in 1985 to 18% in 1991 in South Australia, significant positive interaction between survey year and state ( $p<0.05$ ). |    |
|     |               |                                                                     |                                                              |                                                                   | <i>Prevalence of use, decriminalized/regulated drug(s):</i> weekly use of cannabis                                                                                                                             | No significant interaction between survey year and state.                                                                                                                          |    |
| 28. | Donnelly 2000 | Australia<br>Cannabis decriminalization                             | Repeated cross-sectional study, 1985; 1988; 1991; 1993; 1995 | Population-based;<br>Household survey                             | <i>Prevalence of use, decriminalized/regulated drug(s):</i> lifetime use                                                                                                                                       | Greater increase in lifetime use in South Australia (decriminalized) than the rest of Australia (test for trend, $p<0.05$ ).                                                       | 11 |
|     |               |                                                                     |                                                              |                                                                   | <i>Prevalence of use, decriminalized/regulated drug(s):</i> weekly use                                                                                                                                         | Rate of change for South Australia not significantly different from rest of the country.                                                                                           |    |
| 29. | Dutra 2018    | United States<br>Legal regulation of cannabis for medical use (MCL) | Repeated cross-sectional study, 2008-2015                    | Population-based;<br>Household survey<br><br>N= 91,123 to 10,1973 | <i>Mental health conditions, suicide, or self-harm:</i> state prevalence of serious mental illness                                                                                                             | Liberal MCL associated with 0.2% increase in state prevalence of mental illness ( $b=0.002$ , $SE=0.001$ , $p=0.015$ ). No significant effect of restrictive MCL.                  | 17 |

|     |                |                                                                          |                                                                              |                                        |                                                                                                                                                                                                                                                                                                                                                                                                       |                                                                                                                                                                                                                                                                         |    |
|-----|----------------|--------------------------------------------------------------------------|------------------------------------------------------------------------------|----------------------------------------|-------------------------------------------------------------------------------------------------------------------------------------------------------------------------------------------------------------------------------------------------------------------------------------------------------------------------------------------------------------------------------------------------------|-------------------------------------------------------------------------------------------------------------------------------------------------------------------------------------------------------------------------------------------------------------------------|----|
| 30. | Estoup 2016    | United States<br>Legal regulation of cannabis for recreational use (RCL) | Repeated cross-sectional study, 2010-2015                                    | Convenience sampling<br>N=262          | <p><i>Mental health conditions, suicide, or self-harm</i>: # of reported psychological, behavioral, relational consequences of cannabis use</p> <p><i>Perceived harmfulness of decriminalized/regulated drug(s)</i>: # of cons of continued cannabis use endorsed in decisional balance matrix</p> <p><i>Frequency of use, decriminalized/legalized drug(s)</i>: # of times used in past 3 months</p> | <p>RCL associated with increased negative consequences of use, mediated by increased perceived harmfulness (<i>b</i> for indirect effect=3.73; 95% CI=0.33, 9.55).</p> <p>RCL associated with increased perceived harmfulness.</p> <p>No significant effect of RCL.</p> | 11 |
| 31. | Feige 2008     | China<br>Legal regulation of opium                                       | Repeated cross-sectional study, 1801-1902                                    | Unspecified                            | <p><i>Actual availability of decriminalized/regulated drug(s)</i>:<br/>Quantity of opium exports (number of chests per capita)</p> <p><i>Price of drugs</i>:<br/>Price of opium at the scales in India</p>                                                                                                                                                                                            | <p>No significant effect of legal regulation.</p> <p>No significant effect of legal regulation.</p>                                                                                                                                                                     | 16 |
| 32. | Félix 2017     | Portugal<br>Decriminalization of all drugs                               | Controlled before-and-after study, 1990-2010<br>[13 EU countries and Norway] | Convenience sampling                   | <i>Price of drugs</i> : price data from (1) EU country reports to the Commission on Narcotic Drugs and (2) the European Monitoring Center for Drugs and Drug Addiction                                                                                                                                                                                                                                | Drug prices increased in Portugal following decriminalization, but difference-in-difference and synthetic control analyses indicate no statistically significant change in slope of drug prices.                                                                        | 14 |
| 33. | Gonçalves 2015 | Portugal<br>Decriminalization of all drugs                               | Repeated cross-sectional study, 1999-2010                                    | Population-based;<br>Admin record data | <i>Costs, health care</i> : combined direct costs of (1) drug treatment, prevention and harm reduction and (2) hospital treatment for hepatitis and HIV                                                                                                                                                                                                                                               | 12% increase over first 5 years following decriminalization, 9% over first 11 years.                                                                                                                                                                                    | 13 |

|     |             |                                                                         |                                          |                                    |                                                                                                                                                                                                                                                                                                                                                                                                                             |                                                                                                                                                                                                                                                                                                                                                                                                                            |    |
|-----|-------------|-------------------------------------------------------------------------|------------------------------------------|------------------------------------|-----------------------------------------------------------------------------------------------------------------------------------------------------------------------------------------------------------------------------------------------------------------------------------------------------------------------------------------------------------------------------------------------------------------------------|----------------------------------------------------------------------------------------------------------------------------------------------------------------------------------------------------------------------------------------------------------------------------------------------------------------------------------------------------------------------------------------------------------------------------|----|
|     |             |                                                                         |                                          |                                    | <p><i>Costs, non-health care:</i> combined indirect costs of lost income and production due to (1) drug addiction treatment and (2) drug-related death.</p> <p><i>Costs, non-health care:</i> combined direct costs of social rehabilitation and legal system costs related to drugs</p> <p><i>Costs, non-health care:</i> indirect costs of lost income and production of individuals arrested for drug-related crimes</p> | <p>37% reduction over first 5 years following decriminalization, 29% over first 11 years.</p> <p>17% reduction over first 11 years.</p> <p>5% reduction over first 5 years following decriminalization, 24% over first 11 years.</p>                                                                                                                                                                                       |    |
| 34. | Gorman 2007 | United States<br><br>Legal regulation of cannabis for medical use (MCL) | Interrupted time series study, 1994-2002 | Convenience sampling               | <p><i>Prevalence of use, decriminalized/regulated drug(s):</i> prevalence of positive cannabis urine screen among arrestees.</p> <p><i>Health services utilization:</i> proportion of emergency department visits in which cannabis was mentioned in CA, WA, and CO DAWN sites</p>                                                                                                                                          | <p>No significant effect of MCL on positive cannabis tests in CA or OR.</p> <p>No significant effect of MCL on ED visits mentioning cannabis.</p>                                                                                                                                                                                                                                                                          | 12 |
| 35. | Grant 2018  | United States<br><br>Legal regulation of cannabis for medical use (MCL) | Cohort study, 1998-2012                  | Convenience sampling<br><br>N=1359 | <p><i>Prevalence of use, decriminalized/regulated drug(s):</i> use in last 30 days of substance use case management program</p> <p><i>Prevalence of use, other drugs or alcohol:</i> # of days of use, in past 30 days, of alcohol or drugs</p>                                                                                                                                                                             | <p>Participants exiting case management after MCL were more likely to report past 30-day use (AOR = 2.1, p &lt; 0.0001).</p> <p>Participants exiting case management after MCL used alcohol (<math>b = 0.48</math>, SE=0.24, p &lt; 0.05), illicit methadone (<math>b = 0.67</math>, SE=0.22, p &lt; 0.005), and other opioids (<math>b = 0.52</math>, SE=0.15), p &lt; 0.01) more frequently than the pre-MCL cohort.</p> | 12 |
| 36. | Grucza 2018 | United States                                                           | Controlled before-and-after study,       | Population-based;                  | <i>Criminal justice involvement:</i> arrest rates for cannabis                                                                                                                                                                                                                                                                                                                                                              | Arrest rates decreased by 75% among youth (95% CI: -0.89, -0.44) and 78% among adults (95% CI: -0.89, -0.52).                                                                                                                                                                                                                                                                                                              | 18 |

|     |             |                                                                          |                                                                                                               |                                                             |                                                                                                                                                                                                                                                                                        |                                                                                                                                                                                                                    |    |
|-----|-------------|--------------------------------------------------------------------------|---------------------------------------------------------------------------------------------------------------|-------------------------------------------------------------|----------------------------------------------------------------------------------------------------------------------------------------------------------------------------------------------------------------------------------------------------------------------------------------|--------------------------------------------------------------------------------------------------------------------------------------------------------------------------------------------------------------------|----|
|     |             | Cannabis decriminalization                                               | 2007-2015<br>[States without decriminalization, legal regulation, or change in penalties related to cannabis] | School-based survey<br>N= 622,848                           | possession among minors (18 or under) and adults<br><i>Prevalence of use, decriminalized/regulated drug(s): past 30-day use</i><br><i>Frequency of use, decriminalized/regulated drug(s): frequency of past 30-day use</i>                                                             | Decriminalization was not significantly associated with use.<br>Decriminalization was not significantly associated with frequency of use.                                                                          |    |
| 37. | Grucza 2015 | United States<br>Legal regulation of cannabis for medical use (MCL)      | Controlled before-and-after study, 1990-2010<br>[States without MCL]                                          | Population-based; Admin record data<br>N=662,993            | <i>Mental health conditions, suicide, or self-harm: suicide deaths</i>                                                                                                                                                                                                                 | MCL not significantly associated with suicide rate overall, or when stratified by sex.                                                                                                                             | 16 |
| 38. | Harper 2012 | United States<br>Legal regulation of cannabis for medical use (MCL)      | Controlled before-and-after study, 2002-2009<br>[States without MCL]                                          | Population-based Household survey                           | <i>Prevalence of use, decriminalized/regulated drug(s): past-month use among adolescents</i><br><i>Perceived harmfulness of decriminalized/regulated drug(s): perceived riskiness of monthly use among adolescents</i>                                                                 | *Reanalysis of Wall 2011 (#106)<br>Difference-in-difference estimates indicate no significant effects of MCL, after accounting for state-level covariates and measurement error.<br>No significant effects of MCL. | 15 |
| 39. | Harpin 2018 | United States<br>Legal regulation of cannabis for recreational use (RCL) | Repeated cross-sectional study, 2013-2014                                                                     | Population-based; School-based survey<br>N=11,931 to 12,240 | <i>Prevalence of use, decriminalized/regulated drug(s): lifetime and past 30-day use</i><br><i>Mode of use, decriminalized/regulated drug(s): smoking vs. other modes, among past-month users</i><br><i>Perceived harmfulness of decriminalized/regulated drug(s): high versus low</i> | No significant change after RCL.<br>No significant change after RCL.<br>No significant change after RCL.                                                                                                           | 13 |

|     |            |                                                                              |                                                                                                               |                                                             |                                                                                                               |                                                                                                                                                                                                            |     |
|-----|------------|------------------------------------------------------------------------------|---------------------------------------------------------------------------------------------------------------|-------------------------------------------------------------|---------------------------------------------------------------------------------------------------------------|------------------------------------------------------------------------------------------------------------------------------------------------------------------------------------------------------------|-----|
|     |            |                                                                              |                                                                                                               |                                                             | perceived harmfulness and wrongfulness of use                                                                 |                                                                                                                                                                                                            |     |
|     |            |                                                                              |                                                                                                               |                                                             | <i>Perceived availability of decriminalized/regulated drug(s): high versus low perceived ease of access</i>   | Post-RCL year associated with high perceived access, (AOR= 1.21, 95% CI: 1.09, 1.34).                                                                                                                      |     |
| 40. | Hasin 2017 | United States<br><br>Legal regulation of cannabis for medical use (MCL)      | Controlled before-and-after study, 1991-1992; 2001-2001; 2012-2013<br><br>[late MCL states, never MCL states] | Population-based; Household survey<br><br>N=118,497         | <i>Prevalence of use, decriminalized/regulated drug(s): past-year use</i>                                     | MCL associated with greater increase in past-year use (difference-in-difference coefficient=1.4 percentage points, SE=0.5, p=0.004). Results varied by state and early vs. late MCL adoption.              | 17  |
|     |            |                                                                              |                                                                                                               |                                                             | <i>Substance use disorder or diagnosed dependence: DSM-IV Cannabis Use Disorder in past year</i>              | MCL associated with greater increase in CUD (difference-in-difference coefficient=0.7, SE=0.3, p=0.03).                                                                                                    |     |
| 41. | Hasin 2015 | United States<br><br>Legal regulation of cannabis for medical use (MCL)      | Repeated cross-sectional study, 1991-2014                                                                     | Population-based; School-based survey<br><br>N=1,098,270    | <i>Prevalence of use, decriminalized/regulated drug(s): past 30-day use</i>                                   | No significant effect of MCL overall, but interaction with grade: reduced use among 8 <sup>th</sup> graders post-MCL (AOR=0.73, 95% CI: 0.63, 0.84), but not 10 <sup>th</sup> or 12 <sup>th</sup> graders. | 18  |
| 42. | Hasin 2017 | United States<br><br>Legal regulation of cannabis for medical use (MCL)      | Repeated cross-sectional study, 1991-1992; 2001-2002; 2012-2013                                               | Population-based Household survey                           | <i>Driving under the influence or with detectable concentration, decriminalized/regulated drug(s)</i>         | Prevalence of cannabis-impaired driving increased more in states that passed MCL, but not significantly so (p=0.07).                                                                                       | A * |
|     |            |                                                                              |                                                                                                               |                                                             | <i>Driving under the influence or with detectable concentration, : driving under the influence of alcohol</i> | No significant effect of MCL.                                                                                                                                                                              |     |
| 43. | Hoyte 2015 | United States<br><br>Legal regulation of cannabis for recreational use (RCL) | Repeated cross-sectional study, 2007-2014                                                                     | Population-based; Admin record data<br><br>N= 42 fatalities | <i>Accidents, motor vehicle: THC-positive motor driver fatalities in Denver County, CO</i>                    | Fatalities increased from 0.28/month from July 1, 2007 to Dec 31, 2008 to 0.5/month from 2009-2012 to 0.56/month from Jan 1, 2013 to June 30, 2014 (post-RCL). No statistical tests reported.              | A * |

|     |              |                                                                          |                                                                                       |                                                       |                                                                                                                                  |                                                                                                                                                                                                                                                |    |
|-----|--------------|--------------------------------------------------------------------------|---------------------------------------------------------------------------------------|-------------------------------------------------------|----------------------------------------------------------------------------------------------------------------------------------|------------------------------------------------------------------------------------------------------------------------------------------------------------------------------------------------------------------------------------------------|----|
| 44. | Huber 2016   | United States<br>Legal regulation of cannabis for medical use (MCL)      | Repeated cross-sectional study, 1970-2012                                             | Population-based;<br>Admin record data                | <i>Crime (non-drug):</i> state violent crime rates (FBI Uniform Crime Reports)                                                   | MCL associated with 12.9% reduction in rate ( $b=-0.129$ , $SE= 0.036$ , $p<0.01$ ).                                                                                                                                                           | 14 |
|     |              |                                                                          |                                                                                       |                                                       | <i>Crime (non-drug):</i> state property crime rates                                                                              | MCL associated with 9.2% reduction in rate ( $b=-0.092$ , $SE= 0.032$ , $p<0.01$ ).                                                                                                                                                            |    |
| 45. | Hunt 2017    | United States<br>Legal regulation of cannabis for recreational use (RCL) | Controlled before-and-after study, 2013;2014<br>[WA and OR before RCL implementation] | Population-based;<br>Household survey<br><br>N=5576   | <i>Price of drugs:</i> consumer-reported price per gram                                                                          | No statistically significant effects of implementing legal retail cannabis sales in CO and WA on prices paid for recreational or medical purposes, 4-5 months later.                                                                           | 16 |
| 46. | Johnson 2017 | United States<br>Legal regulation of cannabis for medical use (MCL)      | Repeated cross-sectional study, 1991-2011                                             | Population-based;<br>School-based survey<br>N=715,014 | <i>Prevalence of use, decriminalized/regulated drug(s):</i> past 30-day use among adolescents                                    | MCL associated with decreased odds of past 30-day use (AOR=0.93, 95% CI: 0.86, 0.99). Policy details associated with lower (e.g., years since MCL and liberal provisions) and higher (e.g., voluntary vs. mandatory patient registration) use. | 17 |
|     |              |                                                                          |                                                                                       |                                                       | <i>Frequency of use, decriminalized/regulated drug(s):</i> past 30-day heavy use ( $\geq 20$ times)                              | MCL not associated with odds of heavy use (AOR=1.00, 95% CI: 0.89, 1.13).                                                                                                                                                                      |    |
| 47. | Jones 2015   | United States<br>Legal regulation of cannabis for recreational use (RCL) | Repeated cross-sectional study, 2012; 2014                                            | Unspecified                                           | <i>Prevalence of use, decriminalized/regulated drug(s):</i> THCA-positive meconium specimens from high-risk newborns in Colorado | RCL associated with increase in THCA-positive specimens (from 10.6% to 11.7%) and with increased mean THCA concentrations in positive specimens.                                                                                               | A* |
| 48. | Jones 2018   | United States<br>Legal regulation of cannabis for recreational use (RCL) | Repeated cross-sectional study, 2013-2015                                             | Convenience sampling<br><br>N=1413                    | <i>Frequency of use, decriminalized/regulated drug(s):</i> Categories from no use to daily use.                                  | No statistically significant difference in use frequency between pre- and post-RCL periods.                                                                                                                                                    | 10 |
|     |              |                                                                          |                                                                                       |                                                       | <i>Prevalence of use, other drugs or alcohol:</i> Frequency of cannabis use within alcohol use frequency groups                  | Strength of the relationship between alcohol and cannabis use decreased after RCL (from $r=0.54$ in Nov 2013 to 0.33 in Mar 2015).                                                                                                             |    |

|     |               |                                                                                            |                                           |                                                           |                                                                                                                                                   |                                                                                                                                                                                                                      |    |
|-----|---------------|--------------------------------------------------------------------------------------------|-------------------------------------------|-----------------------------------------------------------|---------------------------------------------------------------------------------------------------------------------------------------------------|----------------------------------------------------------------------------------------------------------------------------------------------------------------------------------------------------------------------|----|
| 49. | Kerr DCR 2017 | United States<br>Legal regulation of cannabis for recreational use (RCL)                   | Repeated cross-sectional study, 2012-2016 | Population-based;<br>School-based survey<br><br>N=10,924  | <i>Prevalence of use, decriminalized/regulated drug(s):</i> past 30-day use                                                                       | No significant association between RCL and past 30-day use overall (AOR=1.21, $p=0.48$ ) but increasing secular trend. RCL associated with increased cannabis use among heavy alcohol users (AOR=1.73, $p=0.0076$ ). | 17 |
|     |               |                                                                                            |                                           |                                                           | <i>Prevalence of use, other drugs or alcohol:</i> past 30-day cigarette use                                                                       | No significant association with RCL.                                                                                                                                                                                 |    |
|     |               |                                                                                            |                                           |                                                           | <i>Prevalence of use, other drugs or alcohol:</i> past 30-day heavy alcohol use                                                                   | No significant association with RCL.                                                                                                                                                                                 |    |
| 50. | Kerr WC 2018  | United States<br>Legal regulation of cannabis for medical (MCL) and recreational use (RCL) | Repeated cross-sectional study, 1984-2015 | Population-based;<br>Household survey<br><br>N=37,359     | <i>Prevalence of use, decriminalized/regulated drug(s):</i> past-year use                                                                         | No significant association between MCL (home growing or dispensaries) or RCL and past-year use, among both women and men.                                                                                            | 17 |
| 51. | Kerr DCR 2018 | United States<br>Legal regulation of cannabis for recreational use (RCL)                   | Repeated cross-sectional study, 2008-2016 | Population-based;<br>School-based survey<br><br>N=281,752 | <i>Prevalence of use, decriminalized/regulated drug(s):</i> past 30-day use                                                                       | RCL associated with increased past 30-day use among university students (AOR= 1.29, 95% CI: 1.13, 1.48).                                                                                                             | 17 |
|     |               |                                                                                            |                                           |                                                           | <i>Prevalence of use, other drugs or alcohol:</i> past 30-day tobacco use                                                                         | RCL associated with decreased tobacco use (AOR= 0.71, $p=0.0001$ ).                                                                                                                                                  |    |
|     |               |                                                                                            |                                           |                                                           | <i>Prevalence of use, other drugs or alcohol:</i> past 30-day alcohol use                                                                         | RCL not associated with alcohol use ( $p=0.59$ ).                                                                                                                                                                    |    |
|     |               |                                                                                            |                                           |                                                           | <i>Prevalence of use, other drugs or alcohol:</i> past 30-day illicit drug use (non-cannabis)                                                     | RCL not associated with illicit drug use ( $p=0.78$ ).                                                                                                                                                               |    |
| 52. | Keyes 2016    | United States<br>Legal regulation of cannabis for medical use (MCL)                        | Repeated cross-sectional study, 1991-2014 | Population-based;<br>School-based survey<br><br>N=973,089 | <i>Perceived harmfulness of decriminalized/regulated drug(s):</i> great or moderate vs. low perceived risk of physical harm due to occasional use | No significant association with MCL in all grades, 10 <sup>th</sup> or 12 <sup>th</sup> , but increased perceived harm in 8 <sup>th</sup> (AOR= 1.21, 95% CI: 1.08, 1.36).                                           | 15 |
|     |               |                                                                                            |                                           |                                                           | <i>Prevalence of use, decriminalized/regulated drug(s):</i> past 30-day use                                                                       | Adjusting for perceived harmfulness, significant negative association between                                                                                                                                        |    |



|     |                            |                                                                          |                                                      |                                                |                                                                                                                                                                                                                                    |                                                                                                                                                                                                                                                                                  |    |
|-----|----------------------------|--------------------------------------------------------------------------|------------------------------------------------------|------------------------------------------------|------------------------------------------------------------------------------------------------------------------------------------------------------------------------------------------------------------------------------------|----------------------------------------------------------------------------------------------------------------------------------------------------------------------------------------------------------------------------------------------------------------------------------|----|
|     |                            |                                                                          |                                                      |                                                |                                                                                                                                                                                                                                    | MCL and use in 8 <sup>th</sup> grade only (AOR= 0.81, 95% CI: 0.72, 0.92).                                                                                                                                                                                                       |    |
| 53. | Khatapoush 2004            | United States<br>Legal regulation of cannabis for medical use (MCL)      | Repeated cross-sectional study, 1995;1997;1999       | Population-based; Household survey<br>N=15,567 | <i>Prevalence of use, decriminalized/regulated drug(s):</i> past-month use<br><i>Perceived availability of decriminalized/regulated drug(s)</i><br><i>Prevalence of use, other drugs or alcohol:</i> past-year use of other drugs. | No statistically significant change over time in California (MCL state) or other states.<br>No statistically significant change over time in California (MCL state) or other states.<br>No statistically significant change over time in California (MCL state) or other states. | 10 |
| 54. | Kim, Anderson et al. 2015  | United States<br>Cannabis decriminalization                              | Repeated cross-sectional study, 2008-2009; 2010-2011 | Population-based; Admin record data<br>N=2574  | <i>Health services utilization:</i> emergency department visits for cyclic vomiting                                                                                                                                                | Decriminalization associated with increase in visits (prevalence ratio= 1.92, 95% CI: 1.33, 2.79).                                                                                                                                                                               | 15 |
| 55. | Kim, Hall, et al. 2016     | United States<br>Legal regulation of cannabis for recreational use (RCL) | Repeated cross-sectional study, 2012-2014            | Population-based; Admin record data            | <i>Health services utilization:</i> cannabis-related emergency department visits                                                                                                                                                   | RCL associated with increase in cannabis-related ED visits by Colorado residents (rate ratio; RR=1.46, $p>0.001$ ) and non-residents (RR=1.17, $p>0.001$ ).                                                                                                                      | 14 |
| 56. | Kim, Santaella et al. 2015 | United States<br>Legal regulation of cannabis for medical use (MCL)      | Repeated cross-sectional study, 1999-2011            | Population-based; Admin record data            | <i>Prescription drug use:</i> annual opioid sales in morphine-equivalent doses                                                                                                                                                     | Adjusting for increasing secular trend, MCL associated with 1% reduction in opioid sales per year of MCL ( $b=-0.01$ , $p=0.0016$ ).                                                                                                                                             | A* |
| 57. | Kim 2017                   | United States<br>Legal regulation of cannabis for medical use (MCL)      | Repeated cross-sectional study, 2004-2013            | Population-based; Household survey             | <i>Prevalence of use, other drugs or alcohol:</i> past-month nonmedical use of prescription opioids                                                                                                                                | No significant difference in prevalence post-MCL for youth, young adults, or adults 26+.                                                                                                                                                                                         | A* |

|     |                                     |                                                                          |                                           |                                                    |                                                                                                                                                                       |                                                                                                                                                             |     |
|-----|-------------------------------------|--------------------------------------------------------------------------|-------------------------------------------|----------------------------------------------------|-----------------------------------------------------------------------------------------------------------------------------------------------------------------------|-------------------------------------------------------------------------------------------------------------------------------------------------------------|-----|
| 58. | Kim, Santaella-Tenorio, et al. 2016 | United States<br>Legal regulation of cannabis for medical use (MCL)      | Repeated cross-sectional study, 1999-2013 | Population-based;<br>Admin record data<br>N=68,394 | <i>Driving under the influence or with detectable concentration, other drugs or alcohol:</i> positive opioid tests among driver fatalities in motor vehicle accidents | MCL not significantly associated with opioid presence overall, but with reduction among decedents age 24-40 (AOR post-MCL vs. pre=0.50, 95% CI=0.37, 0.67). | 17  |
| 59. | Kosterman 2016                      | United States<br>Legal regulation of cannabis for recreational use (RCL) | Interrupted time series study, 1985-2014  | Convenience sampling<br>N=395                      | <i>Frequency of use, decriminalized/regulated drug(s):</i> past-month frequency among WA parents with any past-year use                                               | Frequency of use increased post-RCL (from 4-6 to 10 times/month, $p<0.05$ ).                                                                                | 8   |
|     |                                     |                                                                          |                                           |                                                    | <i>Substance use disorder or diagnosed dependence:</i> meets DSM-IV criteria for cannabis use disorder                                                                | No statistically significant change post-RCL.                                                                                                               |     |
|     |                                     |                                                                          |                                           |                                                    | <i>Perceived harmfulness of decriminalized/regulated drug(s):</i> approval and perceived harmfulness of cannabis use                                                  | Approval increased and perceived harmfulness decreased following RCL ( $p<0.05$ ).                                                                          |     |
| 60. | Larimer 2015                        | United States<br>Legal regulation of cannabis for recreational use (RCL) | Cohort study                              | Unspecified<br>N= 1095                             | <i>Frequency of use, decriminalized/regulated drug(s):</i> # of times used in past month among 12-17 year olds                                                        | No significant change associated with RCL.                                                                                                                  | A * |
|     |                                     |                                                                          |                                           |                                                    | <i>Perceived harmfulness of decriminalized/regulated drug(s):</i> perceived risk due to regular and occasional use                                                    | Perceived risk from regular use decreased among males but not females ( $p$ for interaction=0.017).                                                         |     |
|     |                                     |                                                                          |                                           |                                                    | <i>Perceived availability of decriminalized/regulated drug(s)</i>                                                                                                     | No significant change associated with RCL.                                                                                                                  |     |
|     |                                     |                                                                          |                                           |                                                    | <i>Prevalence of use, other drugs or alcohol:</i> number of drinks consumed per week.                                                                                 | RCL associated with increased number of drinks per week ( $p<0.01$ ), beyond time trends.                                                                   |     |
| 61. | Liang 2018                          | United States<br>Legal regulation of cannabis for                        | Repeated cross-sectional study, 1993-2014 | Population-based;<br>Admin record data             | <i>Prescription drug use:</i> # of filled opioid prescriptions, dosage of filled prescriptions in morphine-equivalent doses, and related Medicaid spending            | MCL not associated not associated with Schedule II opioid use.                                                                                              | 15  |

1  
2  
3  
4  
5  
6  
7  
8  
9  
10  
11  
12  
13  
14  
15  
16  
17  
18  
19  
20  
21  
22  
23  
24  
25  
26  
27  
28  
29  
30  
31  
32  
33  
34  
35  
36  
37  
38  
39  
40  
41  
42  
43  
44  
45  
46  
47

|     |                     |                                                                          |                                                |                                          |                                                                                                                                 |                                                                                                                                                 |     |
|-----|---------------------|--------------------------------------------------------------------------|------------------------------------------------|------------------------------------------|---------------------------------------------------------------------------------------------------------------------------------|-------------------------------------------------------------------------------------------------------------------------------------------------|-----|
|     |                     | medical use (MCL)                                                        |                                                |                                          | for Schedule II opioids (e.g., hydrocodone, oxycodone).                                                                         |                                                                                                                                                 |     |
|     |                     |                                                                          |                                                |                                          | <i>Prescription drug use:</i> as above, for Schedule III opioids (e.g. codeine).                                                | MCL associated with reductions in Schedule III opioid prescriptions (-29.6%, 95% CI: -2.4%, -56.7%), doses, and spending.                       |     |
| 62. | Livingston 2017     | United States<br>Legal regulation of cannabis for recreational use (RCL) | Interrupted time series study, 2000-2015       | Population-based;<br>Admin record data   | <i>Overdose or poisoning, other drugs:</i> deaths with ICD-10 code indicating opioid poisoning                                  | RCL associated with reduction in opioid poisoning deaths, adjusting for comparison state trends (-0.68 deaths per month, 95% CI: -1.35, -0.03). | 16  |
| 63. | Lo 2015             | United States<br>Legal regulation of cannabis for recreational use (RCL) | Uncontrolled before-and-after study, 2013-2015 | Convenience sampling<br>N= 2186          | <i>Prevalence of use, decriminalized/regulated drug(s):</i> positive cannabinoid screen among high-risk opioid therapy patients | RCL associated with increase in positive THC screens (30% of visits to 36%, $p=0.0003$ ).                                                       | A * |
|     |                     |                                                                          |                                                |                                          | <i>Opioid therapy compliance:</i> non-compliance (illicit opioids use or non-use of prescription)                               | RCL not associated with compliance.                                                                                                             |     |
| 64. | Lynne-Landsman 2013 | United States<br>Legal regulation of cannabis for medical use (MCL)      | Switching replications study, 2003-2011        | Population-based;<br>School-based survey | <i>Prevalence of use, decriminalized/regulated drug(s):</i> lifetime and past-month                                             | MCL not associated with use (1 of 20 planned comparisons significant, expected by chance alone).                                                | 15  |
|     |                     |                                                                          |                                                |                                          | <i>Frequency of use, decriminalized/legalized drug(s):</i> daily or weekly use among lifetime users                             | MCL not associated with frequency (1 of 20 planned comparisons significant, expected by chance alone).                                          |     |
| 65. | Martins 2016        | United States<br>Legal regulation of cannabis for medical use (MCL)      | Repeated cross-sectional study, 2004-2013      | Population-based;<br>Household survey    | <i>Prevalence of use, decriminalized/regulated drug(s):</i> past-month use                                                      | MCL associated with greater past-month use among adults 26+ (AOR=1.24, 95% CI: 1.16, 1.31), but not among ages 12-17 or 18-25.                  | 16  |
|     |                     |                                                                          |                                                |                                          | <i>Perceived availability of decriminalized/regulated drug(s):</i> fairly or very easy to obtain vs. other                      | MCL associated with greater availability among adults 26+ (AOR=1.11, 95% CI: 1.07, 1.15), but not among ages 12-17 or 18-25.                    |     |
| 66. | Mason 2016          | United States                                                            | Controlled before-and-after study,             | Convenience sampling                     | <i>Prevalence of use, decriminalized/regulated drug(s):</i> past 30-day use                                                     | Post-RCL subject group not significantly associated with use (AOR= 2.80, 95% CI: 0.94-8.34).                                                    | 13  |

|     |             |                                                                         |                                                        |                                                         |                                                                                                                                                                                                           |                                                                                                                                                                                                                                                                                              |    |
|-----|-------------|-------------------------------------------------------------------------|--------------------------------------------------------|---------------------------------------------------------|-----------------------------------------------------------------------------------------------------------------------------------------------------------------------------------------------------------|----------------------------------------------------------------------------------------------------------------------------------------------------------------------------------------------------------------------------------------------------------------------------------------------|----|
|     |             | Legal regulation of cannabis for recreational use (RCL)                 | 2010-2013<br>[students completed follow up before RCL] | N= 238                                                  | <i>Prevalence of use, other drugs or alcohol: use of cigarettes or alcohol vs. cannabis (indicating substitution effect)</i>                                                                              | Post-RCL subject group significantly less likely to use cigarettes or alcohol versus cannabis ( $p<0.05$ ).                                                                                                                                                                                  |    |
| 67. | Masten 2014 | United States<br><br>Legal regulation of cannabis for medical use (MCL) | Interrupted time series study, 1992-2009               | Population-based;<br>Admin record data<br><br>N=245,495 | <i>Driving under the influence or with detectable concentration, decriminalized/regulated drug(s): proportion of fatal-crash-involved drivers (decedents and survivors) who test cannabinoid-positive</i> | Significant policy effect found in 3 of 12 MCL states, with increases of 2.1-6.0 percentage points among all drivers and 4.6-9.6 among fatally injured drivers in CA, HI, and OR (adjusted for changes in testing and national trends). These were step increases rather than upward trends. | 14 |
| 68. | Mauro 2019  | United States<br><br>Legal regulation of cannabis for medical use (MCL) | Repeated cross-sectional study, 2004-2013              | Population-based;<br>Household survey                   | <i>Prevalence of use, decriminalized/regulated drug(s): past-month use</i>                                                                                                                                | No significant effect of MCL among men or women aged 12-17 or 18-25, but significant increases for ages 26+ among men (+1.7 percentage points, $p < 0.001$ ) and women (+ 1.1%, $p = 0.013$ ).                                                                                               | 16 |
|     |             |                                                                         |                                                        |                                                         | <i>Frequency of use, decriminalized/legalized drug(s): daily use among past-year users</i>                                                                                                                | Significant effect of MCL among men aged 18-25 (+ 2.4%, $p = 0.047$ ), and both men and women age 26+ (men + 2.8%, $p = 0.014$ ; women + 3.4 %, $p = 0.003$ ).                                                                                                                               |    |
|     |             |                                                                         |                                                        |                                                         | <i>Substance use disorder or diagnosed dependence: met DSM-IV criteria for cannabis use disorder</i>                                                                                                      | No statistically significant effect of MCL for any age-gender group.                                                                                                                                                                                                                         |    |
| 69. | Mauro 2017  | United States<br><br>Legal regulation of cannabis for medical use (MCL) | Repeated cross-sectional study, 2004-2013              | Population-based;<br>Household survey                   | <i>Prevalence of use, decriminalized/regulated drug(s): past-month use</i>                                                                                                                                | MCL associated with increased use among adults 26-39 [AOR=1.2, 95% CI: 1.1, 1.3], 40-64 [AOR=1.4, 95% CI: 1.2, 1.5], and 65+ [AOR=2.6, 95% CI: 1.5, 4.6].                                                                                                                                    | A* |
|     |             |                                                                         |                                                        |                                                         | <i>Perceived availability of decriminalized/regulated drug(s)</i>                                                                                                                                         | MCL associated with increased perceived accessibility of cannabis, which partially mediated association between MCL and use.                                                                                                                                                                 |    |

|     |             |                                                                     |                                           |                                                       |                                                                                                                                                              |                                                                                                                                                                                                                                                                                             |    |
|-----|-------------|---------------------------------------------------------------------|-------------------------------------------|-------------------------------------------------------|--------------------------------------------------------------------------------------------------------------------------------------------------------------|---------------------------------------------------------------------------------------------------------------------------------------------------------------------------------------------------------------------------------------------------------------------------------------------|----|
| 70. | Merker 2018 | United States<br>Legal regulation of cannabis for medical use (MCL) | Repeated cross-sectional study, 2012-2017 | Convenience sampling<br>N=302                         | <i>Prevalence of use, decriminalized/regulated drug(s):</i> current use among Inflammatory Bowel Disease patients                                            | Increase in use post-MCL (12.3% to 22.8% of patients, $p=0.0008$ ), but no significant increase in reported medical use.                                                                                                                                                                    | 12 |
| 71. | Miech 2015  | United States<br>Cannabis decriminalization                         | Repeated cross-sectional study, 2007-2013 | Population-based;<br>School-based survey<br>N=320,809 | <i>Prevalence of use, decriminalized/regulated drug(s):</i> lifetime, past-year, past 30-day use                                                             | [Decriminalization in CA in 2010]<br>8 <sup>th</sup> and 10 <sup>th</sup> grades: differences in use between CA residents and other states limited to select years, not sustained over time. 12 <sup>th</sup> grade: past-year use higher among CA residents vs. other states in 2010-2013. | 12 |
|     |             |                                                                     |                                           |                                                       | <i>Perceived harmfulness of decriminalized/regulated drug(s):</i> great vs. less-than-great perceived risk of regular use                                    | 8 <sup>th</sup> and 10 <sup>th</sup> grades: only one significant difference (8 <sup>th</sup> grade in 2012). 12 <sup>th</sup> grade: lower perceived risk among CA residents vs. other states in 2012-2013.                                                                                |    |
|     |             |                                                                     |                                           |                                                       | <i>Perceived availability of decriminalized/regulated drug(s):</i> easy vs. less-than-easy perceived access                                                  | 8 <sup>th</sup> and 10 <sup>th</sup> grades: only one significant difference (8 <sup>th</sup> grade in 2011). 12 <sup>th</sup> grade: higher perceived availability among CA residents vs. other states in 2012 only.                                                                       |    |
|     |             |                                                                     |                                           |                                                       | <i>Attitudes towards use, decriminalized/regulated drug(s):</i> strong disapproval of adult use vs. other                                                    | 8 <sup>th</sup> and 10 <sup>th</sup> grades: only one significant difference (8 <sup>th</sup> grade in 2012). 12 <sup>th</sup> grade: less strong disapproval among CA residents vs. other states in 2012-2013                                                                              |    |
|     |             |                                                                     |                                           |                                                       | <i>Attitudes towards use, decriminalized/regulated drug(s):</i> definitely or probably expect to use five years from present (only 12 <sup>th</sup> graders) | 12 <sup>th</sup> grade: greater expected use among CA residents vs. other states in 2012-2013.                                                                                                                                                                                              |    |
| 72. | Miller 2017 | United States<br>Legal regulation of cannabis for                   | Repeated cross-sectional study, 2005-2015 | Population-based;<br>School-based survey              | <i>Prevalence of use, decriminalized/regulated drug(s):</i> past 30-day use                                                                                  | RCL associated with increase of 2.0-3.5 percentage points (12-22%), adjusting for linear secular trend [passage of RCL, additional effect of legal store openings not statistically significant].                                                                                           | 16 |

|     |             |                                                                              |                                                                                         |                                                                 |                                                                                                                                               |                                                                                                                                                                     |    |
|-----|-------------|------------------------------------------------------------------------------|-----------------------------------------------------------------------------------------|-----------------------------------------------------------------|-----------------------------------------------------------------------------------------------------------------------------------------------|---------------------------------------------------------------------------------------------------------------------------------------------------------------------|----|
|     |             | recreational use (RCL)                                                       |                                                                                         | N=13,335                                                        | <i>Frequency of use, decriminalized/legalized drug(s):</i> past 30-day frequency                                                              | RCL associated with increase of 0.5 days per month, adjusting for linear secular trend [passage of RCL, additional effect of legal store openings not significant]. |    |
|     |             |                                                                              |                                                                                         |                                                                 | <i>Prevalence of use, other drugs or alcohol</i>                                                                                              | RCL passage not associated with changes. In 2015 (legal stores), decrease in tobacco and increase in other illegal drugs, but findings not robust.                  |    |
| 73. | Model 1993  | United States<br><br>Cannabis decriminalization                              | Controlled before-and-after study, 1975-1978<br><br>[States that did not decriminalize] | Population-based;<br>Admin record data                          | <i>Health services utilization:</i> non-cannabis drug mentions at ER visits                                                                   | Decriminalization associated with 12% fewer drug mentions at ER visits ( $b=-0.133$ , $SE=0.053$ , $p<0.01$ ), with stronger effects in initial years.              | 16 |
|     |             |                                                                              |                                                                                         |                                                                 | <i>Health services utilization:</i> cannabis drug mentions at ER visits                                                                       | Decriminalization associated with 64% more cannabis mentions ( $b=-0.642$ , $SE=0.112$ , $p<0.01$ ), with stronger effects in later years.                          |    |
| 74. | Morris 2014 | United States<br><br>Legal regulation of cannabis for medical use (MCL)      | Repeated cross-sectional study, 1990-2006                                               | Population-based;<br>Admin record data                          | <i>Crime (non-drug):</i> rates of violent crime (homicide, rape, robbery, assault)                                                            | MCL associated with 2.4% reduction in homicide rate ( $p<0.01$ ).                                                                                                   | 16 |
|     |             |                                                                              |                                                                                         |                                                                 | <i>Crime (non-drug):</i> rates of property crime (burglary, larceny, auto theft)                                                              | No significant association between MCL and property crimes.                                                                                                         |    |
| 75. | Nappe 2016  | United States<br><br>Legal regulation of cannabis for recreational use (RCL) | Repeated cross-sectional study. 2010-2015                                               | Population-based;<br>Admin record data<br><br>N=5231 exposures  | <i>Overdose or poisoning, decriminalized/regulated drug:</i> cannabis exposures reported to the National Poison Data System in Colorado       | RCL associated with increase in cannabis exposures (86 in 2011 to 231 in 2015).                                                                                     | A* |
| 76. | Onders 2016 | United States<br><br>Legal regulation of cannabis for medical use (MCL)      | Repeated cross-sectional study 2000-2013                                                | Population-based;<br>Admin record data<br><br>N= 1969 exposures | <i>Overdose or poisoning, decriminalized/regulated drug:</i> cannabis exposures among children <6 reported to the National Poison Data System | MCL associated with increased exposures (rate ratio for post vs. pre-MCL=2.25, 95% CI: 1.45, 3.51). Exposures peaked in the year following RCL.                     | 13 |

|     |               |                                                                                                    |                                                                                         |                                                                                  |                                                                                                                                                                                                                                                                                                                                 |                                                                                                                                                                                                                                                                                                                                                                                         |    |
|-----|---------------|----------------------------------------------------------------------------------------------------|-----------------------------------------------------------------------------------------|----------------------------------------------------------------------------------|---------------------------------------------------------------------------------------------------------------------------------------------------------------------------------------------------------------------------------------------------------------------------------------------------------------------------------|-----------------------------------------------------------------------------------------------------------------------------------------------------------------------------------------------------------------------------------------------------------------------------------------------------------------------------------------------------------------------------------------|----|
| 77. | Pacula 2010   | United States<br>Cannabis decriminalization and legal regulation of cannabis for medical use (MCL) | Repeated cross-sectional study, 1987-2003                                               | Convenience sampling                                                             | <i>Price of drugs</i> : price per gram paid at the last transaction among arrestees                                                                                                                                                                                                                                             | Decriminalization and MCL associated with higher prices (indicating increased demand).                                                                                                                                                                                                                                                                                                  | 13 |
| 78. | Pacula 2015   | United States<br>Legal regulation of cannabis for medical use (MCL)                                | Controlled before-and-after study, 1992-2011 and 1997-2011<br>[State-years without MML] | Population-based;<br>Admin record data<br>N=973<br>Household survey<br>N=112,926 | <i>Addiction treatment utilization</i> : number of treatment admissions with cannabis as primary indication<br><br><i>Prevalence of use, decriminalized/regulated drug(s)</i> : past 30-day use<br><br><i>Frequency of use, decriminalized/regulated drug(s)</i> : heavy use (>20 of last 30 days), # of days of use in past 30 | MCL associated with 14% reduction in cannabis admissions (difference-in-difference = -0.136, SE=0.067, $p < 0.05$ ). Larger effect size for non-criminal justice referrals. Partially offset by increase in admissions associated with dispensaries.<br><br>No overall significant association between MCL and use.<br><br>No significant association between MCL and frequency of use. | 15 |
| 79. | Parnes 2018   | United States<br>Legal regulation of cannabis for recreational use (RCL)                           | Repeated cross-sectional study, 2013-2015                                               | Convenience sampling<br>N=5241                                                   | <i>Prevalence of use, decriminalized/regulated drug(s)</i> : past 30-day use                                                                                                                                                                                                                                                    | No significant association between RCL and use among CO undergraduates.                                                                                                                                                                                                                                                                                                                 | 12 |
| 80. | Phillips 2017 | United States<br>Legal regulation of cannabis for medical use (MCL)                                | Repeated cross-sectional study, 2011-2014                                               | Population-based;<br>Admin record data<br>N=188,266                              | <i>Overdose or poisoning, other drugs</i> : state-level age-adjusted opioid-related mortality rate                                                                                                                                                                                                                              | MCL associated with 21.7% increase in opioid-related mortality ( $p < 0.0001$ ) but interacted with prescription drug monitoring programs such that rates decreased in states with both policies.                                                                                                                                                                                       | 15 |



|     |              |                                                                         |                                                                                                                        |                                                                                              |                                                                                                                                                                                                                                                                                                                                                                                                                                         |                                                                                                                                                                                                                                                                                                                                                                                                                                                                                                                                                                                                                                                                                                                                                                                        |    |
|-----|--------------|-------------------------------------------------------------------------|------------------------------------------------------------------------------------------------------------------------|----------------------------------------------------------------------------------------------|-----------------------------------------------------------------------------------------------------------------------------------------------------------------------------------------------------------------------------------------------------------------------------------------------------------------------------------------------------------------------------------------------------------------------------------------|----------------------------------------------------------------------------------------------------------------------------------------------------------------------------------------------------------------------------------------------------------------------------------------------------------------------------------------------------------------------------------------------------------------------------------------------------------------------------------------------------------------------------------------------------------------------------------------------------------------------------------------------------------------------------------------------------------------------------------------------------------------------------------------|----|
| 81. | Plunk 2016   | United States<br><br>Legal regulation of cannabis for medical use (MCL) | Repeated cross-sectional study, 2000-2014                                                                              | Population-based;<br>Household survey<br><br>N=5,483,715                                     | <p><i>Educational outcomes: high school non-completion</i></p> <p><i>Educational outcomes: college non-enrollment among high school graduates</i></p> <p><i>Educational outcomes: college non-completion among college entrants aged 25+</i></p> <p><i>Prevalence of use, decriminalized/regulated drug(s): past-month use</i></p> <p><i>Frequency of use, decriminalized/regulated drug(s): daily use (40 or more times/month)</i></p> | <p>High-school age exposure to MCL not associated with non-completion overall, but with increase in probability of failing to complete conditioned on completing the 12<sup>th</sup> grade (AOR=1.11, 95% CI: 1.05, 1.17).</p> <p>High-school age exposure to MCL associated with college non-enrollment (AOR = 1.09, 95% CI: 1.04, 1.14). Dose-response relationship with years of exposure.</p> <p>High-school age exposure to MCL associated with increase in probability of degree non-completion (AOR = 1.03, 95% CI: 1.01, 1.06).</p> <p>High-school age exposure to MCL not significantly associated with use.</p> <p>High-school age exposure to MCL not significantly associated with use overall, but among 12<sup>th</sup> graders only (AOR=1.62, 95% CI: 1.04, 2.54).</p> | 16 |
| 82. | Pollini 2015 | United States<br><br>Cannabis decriminalization                         | Repeated cross-sectional study<br><br>Roadside Survey, 2010; 2012<br><br>Fatality Analysis Reporting System, 2008-2012 | Population-based;<br>Admin record data<br><br>Roadside Survey, N=379-515<br><br>FARS, N=2860 | <p><i>Driving under the influence or with detectable concentration, decriminalized/regulated drug(s): proportion of drivers testing THC-positive in roadside survey</i></p> <p><i>Driving under the influence or with detectable concentration, decriminalized/regulated drug(s): presence of cannabinoids among fatally injured drivers</i></p>                                                                                        | <p>No statistically significant change in THC-positivity following decriminalization.</p> <p>Increase in cannabinoid prevalence in 2012 as compared to the pre-decriminalization period (AOR = 1.67, 95% CI: 1.28, 2.18).</p>                                                                                                                                                                                                                                                                                                                                                                                                                                                                                                                                                          | 13 |
| 83. | Powell 2018  | United States<br><br>Legal regulation of cannabis for                   | Repeated cross-sectional study, 1999-2013                                                                              | Population-based;<br>Admin record data                                                       | <i>Overdose or poisoning, other drugs: deaths related to prescription opioids and heroin</i>                                                                                                                                                                                                                                                                                                                                            | Existence of MCL not significantly associated with overdose mortality (only active dispensaries associated with reduction in deaths).                                                                                                                                                                                                                                                                                                                                                                                                                                                                                                                                                                                                                                                  | 15 |

|     |              |                                                                              |                                                                                               |                                                     |                                                                                                                                                          |                                                                                                                                                                          |    |
|-----|--------------|------------------------------------------------------------------------------|-----------------------------------------------------------------------------------------------|-----------------------------------------------------|----------------------------------------------------------------------------------------------------------------------------------------------------------|--------------------------------------------------------------------------------------------------------------------------------------------------------------------------|----|
|     |              | medical use (MCL)                                                            |                                                                                               |                                                     | <i>Addiction treatment utilization</i> : number of treatment episodes related to pain reliever misuse                                                    | Existence of MCL not significantly associated with overdose mortality (only active dispensaries associated with reduction).                                              |    |
|     |              |                                                                              |                                                                                               |                                                     | <i>Prevalence of use, other drugs or alcohol</i> : self-reported nonmedical use of pain relievers (National Survey on Drug Use and Health)               | No statistically significant association between MCL and use.                                                                                                            |    |
|     |              |                                                                              |                                                                                               |                                                     | <i>Prescription drug use</i> : morphine-equivalent doses of opioids distributed to legal medical markets                                                 | No statistically significant association between MCL and use over full time period.                                                                                      |    |
| 84. | Prue 2014    | United States<br><br>Peyote decriminalization                                | Repeated cross-sectional study, 1985-2010                                                     | Population-based; Household survey<br><br>N=886,088 | <i>Prevalence of use, decriminalized/regulated drug(s)</i> : peyote use                                                                                  | Use among American Indians increased from 1% in 1994 (year of American Indian Religious Freedom Act) to 10% in 1999. Use among non-American Indians remained steady <2%. | 7  |
|     |              |                                                                              |                                                                                               |                                                     | <i>Age of first use, decriminalized/regulated drug</i> : age at first use of peyote                                                                      | No significant change in age at first use among American Indians or non-American Indians following decriminalization.                                                    |    |
| 85. | Ramirez 2017 | United States<br><br>Legal regulation of cannabis for recreational use (RCL) | Repeated cross-sectional study, 2014;2015                                                     | Unspecified<br><br>N=2400                           | <i>Driving under the influence or with detectable concentration, decriminalized/regulated drug(s)</i> : daytime prevalence of cannabis-positive drivers  | Statistically significant increase post-RCL (7.8% to 18.9% after one year).                                                                                              | A* |
| 86. | Reith 2015   | International<br><br>Cannabis decriminalization                              | Controlled before-and-after study, 1980-2012<br><br>[Country-years without decriminalization] | Unspecified<br><br>N=102 countries                  | <i>Actual availability of decriminalized/regulated drug(s)</i> : kg of cannabis seized and number of plants eradicated divided by population in millions | Decriminalization associated with increased plant eradication ( $p<0.05$ ), but not seizures.                                                                            | 10 |

|     |                |                                                                          |                                                                           |                                                              |                                                                                                                                                                                                                                              |                                                                                                                                                     |     |
|-----|----------------|--------------------------------------------------------------------------|---------------------------------------------------------------------------|--------------------------------------------------------------|----------------------------------------------------------------------------------------------------------------------------------------------------------------------------------------------------------------------------------------------|-----------------------------------------------------------------------------------------------------------------------------------------------------|-----|
| 87. | Rodriguez 2016 | United States<br>Legal regulation of cannabis for recreational use (RCL) | Cohort study, 2009-2015                                                   | Convenience sampling<br>N= 1698                              | <i>Prevalence of use, decriminalized/regulated drug(s):</i> positive urine toxicology among pregnant young women<br><br><i>Disclosure of use, decriminalized/regulated drug(s):</i> agreement between self-reported use and urine toxicology | Increased cannabis-positive screens post-RCL (16.2 to 20.2%, $p=0.048$ ).<br><br>Improved agreement post-RCL (kappa = 0.504 vs. 0.191).             | A * |
| 88. | Rohda 2017     | United States<br>Legal regulation of cannabis for recreational use (RCL) | Repeated cross-sectional study, 2011-2016                                 | Population-based;<br>Admin record data<br>N=29,044 exposures | <i>Overdose or poisoning, other drugs:</i> synthetic cannabinoid receptor agonist (SCRA) exposures reported to poison control centers                                                                                                        | SCRA exposures declined in WA (175 to 28, $p=0.017$ ) and OR (39 to 14, $p=0.012$ ) following RCL, but not in all RCL states combined ( $p=0.41$ ). | A * |
| 89. | Rusby 2018     | United States<br>Legal regulation of cannabis for recreational use (RCL) | Cohort study, 2014-2016                                                   | Population-based;<br>School-based survey<br>N=444            | <i>Prevalence of use, decriminalized/regulated drug(s):</i> past 30-day use                                                                                                                                                                  | RCL not significantly associated with use.                                                                                                          | 12  |
|     |                |                                                                          |                                                                           |                                                              | <i>Frequency of use, decriminalized/regulated drug(s):</i> number of days use in past 30                                                                                                                                                     | RCL associated with greater number of days of use (ARR=1.26, 95% CI: 1.10, 1.45).                                                                   |     |
|     |                |                                                                          |                                                                           |                                                              | <i>Attitudes towards use, decriminalized/regulated drug(s):</i> willingness and intention to use (any vs. none)                                                                                                                              | RCL not significantly associated with willingness or intention to use.                                                                              |     |
| 90. | Sabia 2017     | United States<br>Legal regulation of cannabis for medical use (MCL)      | Controlled before-and-after study. 1990-2012<br>[State-years without MML] | Population-based;<br>Household survey<br>N=5,428,399         | <i>BMI</i>                                                                                                                                                                                                                                   | MCL associated with reduction in BMI (adjusted difference-in-differences for contemporaneous effect = -0.084, SE=0.034, $p<0.05$ ).                 | 16  |

|     |                        |                                                                     |                                                                               |                                                                  |                                                                                                                                  |                                                                                                                                                                                                       |    |
|-----|------------------------|---------------------------------------------------------------------|-------------------------------------------------------------------------------|------------------------------------------------------------------|----------------------------------------------------------------------------------------------------------------------------------|-------------------------------------------------------------------------------------------------------------------------------------------------------------------------------------------------------|----|
| 91. | Santaella-Tenorio 2017 | United States<br>Legal regulation of cannabis for medical use (MCL) | Repeated cross-sectional study, 1985-2014                                     | Population-based;<br>Admin record data<br><br>N=1,220,610 deaths | <i>Accidents, motor vehicle</i> : age-adjusted traffic fatality rates (all road users)                                           | MCL associated with 10.8% reduction in traffic fatality rates (95% CI = 9.0%, 12.5%).                                                                                                                 | 17 |
| 92. | Schmidt 2016           | United States<br>Legal regulation of cannabis for medical use (MCL) | Repeated cross-sectional study, 2014-2013                                     | Population-based;<br>Household survey<br><br>N=450,300           | <i>Perceived harmfulness of decriminalized/regulated drug(s)</i> : belief that weekly/monthly use is “not a great risk”          | Living in MCL state not associated with perceived harmfulness. (Secular trend towards greater permissiveness for all outcomes, but no significant effects MCL after control for state fixed effects). | 17 |
|     |                        |                                                                     |                                                                               |                                                                  | <i>Attitudes towards use, decriminalized/regulated drug(s)</i> : belief that parents/friends don't disapprove of trying cannabis | Living in MCL state not associated with perceived attitudes.                                                                                                                                          |    |
|     |                        |                                                                     |                                                                               |                                                                  | <i>Perceived availability of decriminalized/regulated drug(s)</i> : belief that cannabis is fairly or very easy to obtain        | Living in MCL state not associated with perceived availability.                                                                                                                                       |    |
| 93. | Sevigny 2014           | United States<br>Legal regulation of cannabis for medical use (MCL) | Controlled before-and-after study, 1990-2010<br><br>[State-years without MCL] | Convenience sampling<br><br>N=39,157                             | <i>Potency of decriminalized/regulated drug(s)</i> : concentration of THC in cannabis seized by law enforcement                  | MCL not significantly associated with potency (adjusted difference in %THC=0.53, $p>0.05$ ), but legal dispensaries associated with higher potency.                                                   | 16 |
| 94. | Shah 2018              | United States<br>Legal regulation of cannabis for medical use (MCL) | Repeated cross-sectional study, 2006-2014                                     | Population-based;<br>Admin record data                           | <i>Prescription drug use</i> : opioid use among commercially insured population.                                                 | MCL associated with lower odds of any opioid use (AOR=0.95, 95% CI: 0.94, 0.96), chronic opioid use (AOR=0.93, 95% CI: 0.91, 0.95) and high-risk opioid use (AOR=0.98, 95% CI: 0.96, 0.99).           | A* |
| 95. | Shepard 2016           | United States<br>Legal regulation of cannabis for                   | Repeated cross-sectional study, 1997-2009                                     | Population-based;<br>Admin record data                           | <i>Crime (non-drug)</i> : property crime (burglary, larceny, and vehicle theft arrests per 1000 residents)                       | MCL not associated with property crime.                                                                                                                                                               | 12 |

|     |                  |                                                                              |                                                       |                                                                       |                                                                                                                                                                                                                   |                                                                                                                                                                                                              |    |
|-----|------------------|------------------------------------------------------------------------------|-------------------------------------------------------|-----------------------------------------------------------------------|-------------------------------------------------------------------------------------------------------------------------------------------------------------------------------------------------------------------|--------------------------------------------------------------------------------------------------------------------------------------------------------------------------------------------------------------|----|
|     |                  | medical use (MCL)                                                            |                                                       |                                                                       | <i>Crime (non-drug):</i> violent crime (assault, homicide, rape, and robbery arrests)                                                                                                                             | MCL associated with reduction in violent crimes (-0.254 crimes per 1000 residents, SE=0.089, $p<0.05$ ).                                                                                                     |    |
| 96. | Shi 2017         | United States<br><br>Legal regulation of cannabis for medical use (MCL)      | Repeated cross-sectional study, 1997-2014             | Population-based;<br>Admin record data<br><br>N= 0.4M to 2.2M records | <i>Health services utilization:</i> annual hospitalization rate for cannabis dependence or abuse (ICD-9)<br><br><i>Overdose or poisoning, other drugs:</i> hospitalization rate for opioid pain reliever overdose | MCL not significantly associated with hospitalizations.<br><br>MCL associated with reduction in hospitalizations related to opioid overdose (adjusted prevalence difference = -0.13, 95% CI: -0.25, -0.018). | 16 |
|     |                  |                                                                              |                                                       |                                                                       | <i>Health services utilization:</i> hospitalization rate for opioid dependence or abuse                                                                                                                           | MCL associated with reduction in hospitalizations related to opioid dependence (adjusted prevalence difference = -0.23, 95% CI: -0.41, -0.068).                                                              |    |
| 97. | Sokoya 2018      | United States<br><br>Legal regulation of cannabis for recreational use (RCL) | Repeated cross-sectional study, 2012-2015             | Convenience sampling<br><br>N=2164                                    | <i>Accidents, other:</i> types of bony facial trauma among patients presenting to two CO hospitals                                                                                                                | RCL not associated with significant difference in mechanisms of facial fracture.                                                                                                                             | 12 |
| 98. | Steinemann 2018  | United States<br><br>Legal regulation of cannabis for medical use (MCL)      | Repeated cross-sectional study, 1993-2000; 2001-2015  | Population-based;<br>Admin record data<br><br>N=1578                  | <i>Driving under the influence or with detectable concentration, decriminalized/regulated drug(s):</i> proportion of fatally injured drivers who were cannabis-positive in HI                                     | MCL associated with increase in THC positivity (5.5% in 1993-2000; 16.3% in 2011-2015, $p<0.001$ ).                                                                                                          | 12 |
|     |                  |                                                                              |                                                       |                                                                       | <i>Driving under the influence or with detectable concentration, other drugs or alcohol:</i> proportion of fatally injured drivers who were methamphetamine- or alcohol-positive                                  | MCL not associated with significant difference in positivity rates.                                                                                                                                          |    |
| 99. | Stolzenberg 2016 | United States<br><br>Legal regulation of cannabis for                        | Repeated cross-sectional study, 2002-2003; 2004-2005; | Population-based;<br>School-based survey                              | <i>Prevalence of use, decriminalized/regulated drug(s):</i> past-month use among adolescents                                                                                                                      | Living in MCL state associated with greater use (adjusted coefficient=0.861, SE=0.298, $p<0.01$ ).                                                                                                           | 14 |

|      |             |                                                                              |                                                                               |                                                     |                                                                                                                                                                           |                                                                                                                                                                                   |    |
|------|-------------|------------------------------------------------------------------------------|-------------------------------------------------------------------------------|-----------------------------------------------------|---------------------------------------------------------------------------------------------------------------------------------------------------------------------------|-----------------------------------------------------------------------------------------------------------------------------------------------------------------------------------|----|
|      |             | medical use (MCL)                                                            | 2006-2007; 2008-2009; 2010-2011                                               |                                                     | <i>Prevalence of use, other drugs or alcohol:</i> past-month non-cannabis illicit drug use                                                                                | No significant association between living in MCL state and use.                                                                                                                   |    |
| 100. | Straub 2017 | United States<br><br>Legal regulation of cannabis for recreational use (RCL) | Repeated cross-sectional study, 2011-2012; 2012-2014; 2014-2016               | Population-based; Admin record data<br><br>N=25,763 | <i>Prevalence of use, decriminalized/regulated drug(s):</i> positive urine screen or documented use during pregnancy                                                      | No significant change in cannabis-positivity post-RCL.                                                                                                                            | A* |
| 101. | Suggs 1981  | United States<br><br>Cannabis decriminalization                              | Uncontrolled before-and-after study, 1977-1979                                | Population-based; Admin record data<br><br>N=719    | <i>Criminal justice involvement:</i> possession arrests and citations for adults and minors in two NE cities                                                              | No significant difference in mean monthly arrests following decriminalization.                                                                                                    | 12 |
|      |             |                                                                              |                                                                               |                                                     | <i>Criminal justice involvement:</i> possession prosecutions for adults and minors                                                                                        | Significant increase in prosecutions following decriminalization among minors (from mean of 1.92 to 5.75/month, $p<0.05$ ), but not adults (26.71 to 36.25, $p>0.05$ ).           |    |
|      |             |                                                                              |                                                                               |                                                     | <i>Criminal justice involvement:</i> defendants representing themselves                                                                                                   | Significant increase following decriminalization (from 18.07 to 30.75/month, $p<0.05$ ).                                                                                          |    |
|      |             |                                                                              |                                                                               |                                                     | <i>Criminal justice involvement:</i> case dismissal before trial                                                                                                          | Significant decrease following decriminalization (from 9.14 to 2.37/month, $p<0.001$ ).                                                                                           |    |
| 102. | Ullman 2017 | United States<br><br>Legal regulation of cannabis for medical use (MCL)      | Controlled before-and-after study, 1992-2012<br><br>[State-years without MCL] | Population-based; Household survey<br><br>N=757,677 | <i>Workplace absence:</i> self-reported absence for medical reasons in the past week                                                                                      | MCL associated with lower probability of absence ( $b= -0.0013$ , $SE=0.0007$ , $p<0.10$ ), with effects concentrated in loosely regulated MCL states, men and people aged 30-49. | 16 |
| 103. | Urfer 2014  | United States<br><br>Legal regulation of cannabis for recreational use (RCL) | Repeated cross-sectional study, 2011-2014                                     | Convenience sampling<br><br>N=12,082                | <i>Driving under the influence or with detectable concentration, decriminalized/regulated drug(s):</i> Proportion of THC-positive blood samples collected from CO drivers | Increase in THC-positive screens from 2011 (28%) to 2012 (59%) to 2013 (65%), $p=0.001$ . No significant change in first two months of legal cannabis sales.                      | 11 |



|      |             |                                                                                            |                                           |                                                           |                                                                                                                                                                                                                       |                                                                                                                                                                                                                                                                                                                                                                                                              |    |
|------|-------------|--------------------------------------------------------------------------------------------|-------------------------------------------|-----------------------------------------------------------|-----------------------------------------------------------------------------------------------------------------------------------------------------------------------------------------------------------------------|--------------------------------------------------------------------------------------------------------------------------------------------------------------------------------------------------------------------------------------------------------------------------------------------------------------------------------------------------------------------------------------------------------------|----|
| 104. | Wagner 2016 | United States<br>Legal regulation of cannabis for recreational use (RCL)                   | Repeated cross-sectional study, 2012-2015 | Convenience sampling<br>N=34                              | <i>Physical health consequences of use, decriminalized/regulated drug(s):</i> Reversible Cerebral Vasoconstriction Syndrome (RCVS) cases secondary to cannabis                                                        | Of 18 RCVS cases before RCL, 1 patient used cannabis. Of 16 cases after RCL, 5 used cannabis. No statistical tests reported.                                                                                                                                                                                                                                                                                 | A* |
| 105. | Wall 2016   | United States<br>Legal regulation of cannabis for medical use (MCL)                        | Repeated cross-sectional study, 2002-2010 | Population-based;<br>Household survey                     | <i>Prevalence of use, decriminalized/regulated drug(s):</i> past-month use among adolescents                                                                                                                          | *Reanalysis of Stolzenberg 2016 (#99)<br><br>After appropriate adjustment for pre-MCL prevalence, MCL not associated with adolescent use ( $b = 0.33\%$ ; $SE = 0.29\%$ , $p = 0.25$ ).                                                                                                                                                                                                                      | 18 |
| 106. | Wall 2011   | United States<br>Legal regulation of cannabis for medical use (MCL)                        | Repeated cross-sectional study, 2002-2008 | Population-based;<br>Household survey<br><br>N=23,300     | <i>Prevalence of use, decriminalized/regulated drug(s):</i> past-month use among adolescents<br><br><i>Perceived harmfulness of decriminalized/regulated drug(s):</i> perceived “great risk” of using monthly or more | Use was significantly higher in MCL states (average of 8.7% vs. 6.9%) but among states that passed MCL from 2004-2008, baseline use (pre-MCL) was already higher than in non-MCL states.<br><br>Perceived harmfulness was significantly lower in MCL states each year (average of 8.7% vs. 6.9%), but among states that passed MCL, baseline perceived risk (pre-MCL) was already lower than non-MCL states. | 13 |
| 107. | Wang 2018   | United States<br>Legal regulation of cannabis for recreational use (RCL)                   | Repeated cross-sectional study, 2005-2015 | Population-based;<br>Admin record data<br><br>N=4202      | <i>Health services utilization:</i> emergency or urgent care visits with a cannabis-related discharge code or THC-positive urine toxicology among adolescents                                                         | Cannabis-related visits increased from 1.8 per 1000 visits in 2009 to 4.9 per 1000 in 2015, following RCL ( $p < 0.0001$ ).                                                                                                                                                                                                                                                                                  | 11 |
| 108. | Wang 2017   | United States<br>Legal regulation of cannabis for medical (MCL) and recreational use (RCL) | Repeated cross-sectional study, 2000-2015 | Population-based;<br>Admin record data<br><br>N=7,432,254 | <i>Health services utilization:</i> hospitalizations with cannabis-related billing codes<br><br><i>Health services utilization:</i> emergency department visits with cannabis-related billing codes                   | Hospitalizations increased from 274 per 100,000 in 2000 (prior to MCL) to 593 in 2015 (after RCL). Statistically significant 25% increase in 2014 (RCL implementation with legal sales).<br><br>ED visits increased from 313 per 100,000 in 2011 to 478 in 2015, with highest rate in 2014 (554). Statistically significant increase in 2014 ( $p = 0.0005$ ).                                               | 14 |



|      |           |                                                                                                |                                                                                                       |                                                                                 |                                                                                                                                                                                                                                                                                                                                                                                                                                               |                                                                                                                                                                                                                                                                                                                                                                                                                                                                                                                                                   |    |
|------|-----------|------------------------------------------------------------------------------------------------|-------------------------------------------------------------------------------------------------------|---------------------------------------------------------------------------------|-----------------------------------------------------------------------------------------------------------------------------------------------------------------------------------------------------------------------------------------------------------------------------------------------------------------------------------------------------------------------------------------------------------------------------------------------|---------------------------------------------------------------------------------------------------------------------------------------------------------------------------------------------------------------------------------------------------------------------------------------------------------------------------------------------------------------------------------------------------------------------------------------------------------------------------------------------------------------------------------------------------|----|
|      |           |                                                                                                |                                                                                                       |                                                                                 | <i>Overdose or poisoning, decriminalized/regulated drug: cannabis exposure calls to CO poison control centers</i>                                                                                                                                                                                                                                                                                                                             | Poison control calls increased by 79.9% following RCL implementation in 2014, from 123 to 221 ( $p=0.0001$ ).                                                                                                                                                                                                                                                                                                                                                                                                                                     |    |
| 109. | Wang 2016 | United States<br><br>Legal regulation of cannabis for recreational use (RCL)                   | Repeated cross-sectional study, 2009-2015                                                             | Population-based;<br>Admin record data<br><br>N=62                              | <i>Overdose or poisoning, decriminalized/regulated drug: children's hospital visits related to cannabis exposure</i><br><br><i>Overdose or poisoning, decriminalized/regulated drug: poison control calls related to cannabis exposure among children 0-9</i>                                                                                                                                                                                 | RCL associated with increased cannabis-related visits (1.2 per 100,000 in 2012-2013 to 2.3 per 100,000 in 2014-2015, $p=0.02$ ).<br><br>RCL associated with increased cannabis-related calls in CO (2.7 per 100,000 in 2012-2013 to 5.3 per 100,000 in 2014-2015, $p<0.001$ ) and in comparison to rest of the US (34% increase in CO vs. 19% increase in remainder of US, $p=0.04$ ).                                                                                                                                                            | 13 |
| 110. | Wen 2018  | United States<br><br>Legal regulation of cannabis for medical (MCL) and recreational use (RCL) | Controlled before-and-after study, 2011-2016<br><br>[States without MCL or RCL over the study period] | Population-based;<br>Admin record data<br><br>N=1059 state-quarter observations | <i>Prescription drug use: number of opioid prescriptions covered by Medicaid on a quarterly, per-1000-Medicaid-enrollee basis in each state</i>                                                                                                                                                                                                                                                                                               | MCL and RCL associated with reductions in prescriptions of 5.88% (95% CI: -11.55%, -0.21%) and 6.38% (95% CI: -12.20, -0.56%) respectively.                                                                                                                                                                                                                                                                                                                                                                                                       | 17 |
| 111. | Wen 2015  | United States<br><br>Legal regulation of cannabis for medical use (MCL)                        | Repeated cross-sectional study, 2004-2012                                                             | Population-based;<br>Household survey<br><br>N=593,400                          | <i>Prevalence of use, decriminalized/regulated drug(s): past-month use; past-year initiation</i><br><br><i>Frequency of use, decriminalized/regulated drug(s): daily/almost daily use (&gt;20 days in month); # of days among past-month users</i><br><br><i>Prevalence of use, other drugs or alcohol: # of drinks in past month; # of binge drinking days; met DSM-IV alcohol use disorder criteria in past year; both cannabis use and</i> | MCL associated with increase in past-month use among adults 21+ (+1.32%, $p<0.05$ ) but not ages 12-20. MCL associated with increased risk of past-year initiation among ages 12-20 only (+0.32%, $p<0.05$ ).<br><br>MCL associated with increase in (almost) daily use among adults 21+ (+0.58%, $p<0.05$ ) but not ages 12-20.<br><br>MCL associated with frequency of binge drinking (+0.16 days, $p<0.05$ ) and past-month use of both cannabis and alcohol (+1.44%, $p<0.01$ ) among adults 21+. No associations with alcohol use among ages | 17 |

|      |               |                                                                         |                                                                               |                                                                                                                                                                       |                                                                                                                                              |                                                                                                                                             |    |
|------|---------------|-------------------------------------------------------------------------|-------------------------------------------------------------------------------|-----------------------------------------------------------------------------------------------------------------------------------------------------------------------|----------------------------------------------------------------------------------------------------------------------------------------------|---------------------------------------------------------------------------------------------------------------------------------------------|----|
|      |               |                                                                         |                                                                               |                                                                                                                                                                       | binge drinking in past month; use of cannabis and alcohol on same occasion in past month                                                     | 12-20, or with alcohol use disorders.                                                                                                       |    |
|      |               |                                                                         |                                                                               |                                                                                                                                                                       | <i>Prevalence of use, other drugs or alcohol</i> ; past-year use of non-medical prescription painkillers, heroin, cocaine                    | No immediate or lagged associations between MCL and illicit drug use in either age group.                                                   |    |
|      |               |                                                                         |                                                                               |                                                                                                                                                                       | <i>Substance use disorder or diagnosed dependence</i> : met DSM-IV cannabis use disorder criteria in past year                               | Lagged associations between MCL and cannabis use disorder among adults 21+ (+0.25% at 1 year, $p < 0.05$ ) but not among ages 12-20.        |    |
| 112. | Wen 2019      | United States<br><br>Legal regulation of cannabis for medical use (MCL) | Controlled before-and-after study, 2004-2012<br><br>[Non-MCL states]          | Population-based; Household survey<br><br>N=388,200                                                                                                                   | <i>Perceived availability of decriminalized/regulated drug(s)</i> : (very) easy to obtain, among adolescents and young adults                | No significant association between MCL and perceived availability among ages 12-17 or 18-25.                                                | 16 |
|      |               |                                                                         |                                                                               | <i>Attitudes towards use, decriminalized/regulated drug(s)</i> : acceptance of use by other adolescents/young adults; perceived parental acceptance (ages 12-17 only) | MCL significantly associated with lower perceived parental acceptance among ages 12-17 (-0.37%, 95% CI: -0.72, -0.03).                       |                                                                                                                                             |    |
|      |               |                                                                         |                                                                               | <i>Perceived harmfulness of decriminalized/regulated drug(s)</i> : no/low health risk of using once or twice per week                                                 | MCL significantly associated with higher perceived harmlessness among ages 18-25 only (+4.72%, 95% CI: 0.15, 9.28).                          |                                                                                                                                             |    |
| 113. | Williams 2017 | United States<br><br>Legal regulation of cannabis for medical use (MCL) | Controlled before-and-after study, 2004-2013<br><br>[State-years without MCL] | Population-based; Household survey                                                                                                                                    | <i>Prevalence of use, decriminalized/regulated drug(s)</i> : past-month use                                                                  | Only loosely regulated MCL associated with higher use, among adults 26+ only (adjusted prevalence difference = +1.46%, 95% CI: 0.33, 2.58). | 15 |
|      |               |                                                                         |                                                                               | <i>Frequency of use, decriminalized/legalized drug(s)</i> : heavy use in past year (>300 days), among past-year users                                                 | Tightly regulated MCL associated with less heavy use, among ages 12-17 only (adjusted prevalence difference = -3.67%, 95% CI: -7.24, -0.11). |                                                                                                                                             |    |
|      |               |                                                                         |                                                                               | <i>Substance use disorder or diagnosed dependence</i> met DSM-IV criteria for cannabis use disorder                                                                   | Loosely regulated MCL associated with lower prevalence of cannabis use disorder, among ages 18-25 only (-0.80%, 95% CI: -1.45, -0.16).       |                                                                                                                                             |    |

1  
2  
3  
4  
5  
6  
7  
8  
9  
10  
11  
12  
13  
14  
15  
16  
17  
18  
19  
20  
21  
22  
23  
24  
25  
26  
27  
28  
29  
30  
31  
32  
33  
34  
35  
36  
37  
38  
39  
40  
41  
42  
43  
44  
45  
46  
47

|      |               |                                             |                                                                                                            |                                                    |                                                                              |                                                                                                                                                                                                                                                                            |    |
|------|---------------|---------------------------------------------|------------------------------------------------------------------------------------------------------------|----------------------------------------------------|------------------------------------------------------------------------------|----------------------------------------------------------------------------------------------------------------------------------------------------------------------------------------------------------------------------------------------------------------------------|----|
| 114. | Williams 2014 | Australia<br><br>Cannabis decriminalization | Controlled before-and-after study, 1998;2001;2004;2007;2010<br><br>[state-years without decriminalization) | Population-based; Household survey<br><br>N=39,087 | <i>Age of first use, decriminalized/regulated drug(s):</i> age at initiation | Decriminalization not associated with hazard of cannabis uptake overall but interacts with age such that minors under decriminalization have a 12% higher hazard rate of uptake while adults under decriminalization have an 11% lower hazard rate of uptake ( $p<0.01$ ). | 18 |
|------|---------------|---------------------------------------------|------------------------------------------------------------------------------------------------------------|----------------------------------------------------|------------------------------------------------------------------------------|----------------------------------------------------------------------------------------------------------------------------------------------------------------------------------------------------------------------------------------------------------------------------|----|

\*A = abstract; no quality appraisal performed.

For peer review only

Supplementary Table 2. Direction of effect of decriminalization or legal regulation, by outcome category

| Outcomes                                                                                           | # of outcomes | # reporting beneficial effects | # reporting harmful effects | # reporting mixed effects | # reporting no effect | Article # (See Included Studies)                                | Average quality (of 18, excluding abstracts) |
|----------------------------------------------------------------------------------------------------|---------------|--------------------------------|-----------------------------|---------------------------|-----------------------|-----------------------------------------------------------------|----------------------------------------------|
| Accidents, motor vehicle                                                                           | 4             | 1                              | 1                           | 1                         | 1                     | 3, 8, 43, 91                                                    | 14.3                                         |
| Accidents, other                                                                                   | 4             | 0                              | 2                           | 1                         | 1                     | 5, 11, 14, 97                                                   | 12.7                                         |
| Addiction treatment utilization                                                                    | 4             | 0                              | 1                           | 1                         | 2                     | 1, 25, 78, 83                                                   | 14.5                                         |
| Age of first use, decriminalized/regulated drug                                                    | 3             | 0                              | 0                           | 1                         | 2                     | 23, 84, 114                                                     | 12.7                                         |
| Attitudes towards use, decriminalized/regulated drug                                               | 6             | 0                              | 1                           | 3                         | 2                     | 27, 71, 89, 92, 112                                             | 14.0                                         |
| Availability of decriminalized/regulated drug                                                      | 3             | 0                              | 0                           | 1                         | 2                     | 6, 31, 86                                                       | 13.3                                         |
| BMI                                                                                                | 1             | 1                              | 0                           | 0                         | 0                     | 90                                                              | 16.0                                         |
| Costs, health care                                                                                 | 3             | 2                              | 1                           | 0                         | 0                     | 15, 17, 33                                                      | 15.7                                         |
| Costs, other                                                                                       | 3             | 3                              | 0                           | 0                         | 0                     | 33                                                              | 13.0                                         |
| Crime (non-drug)                                                                                   | 9             | 5                              | 0                           | 0                         | 4                     | 7, 44, 74, 95                                                   | 14.0                                         |
| Criminal justice involvement                                                                       | 8             | 1                              | 3                           | 1                         | 3                     | 7, 25, 36, 101                                                  | 13.8                                         |
| Disclosure of use to healthcare provider                                                           | 1             | 1                              | 0                           | 0                         | 0                     | 87                                                              | N/A                                          |
| Educational outcomes                                                                               | 3             | 0                              | 2                           | 1                         | 0                     | 81                                                              | 16.0                                         |
| Frequency of use, decriminalized/regulated drug                                                    | 16            | 1                              | 3                           | 4                         | 8                     | 6, 18, 30, 36, 46, 47, 59, 60, 64, 69, 72, 78, 81, 89, 111, 113 | 14.4                                         |
| Health services utilization (excluding addictions treatment)                                       | 12            | 2                              | 6                           | 1                         | 3                     | 13, 19, 34, 54, 55, 73, 96, 107, 108                            | 13.8                                         |
| Driving under the influence or with detectable concentrations of the decriminalized/regulated drug | 8             | 0                              | 5                           | 1                         | 2                     | 26, 42, 67, 82, 85, 98, 103                                     | 12.0                                         |

| <b>Outcomes</b>                                                                            | <b>Number of outcomes</b> | <b># reporting beneficial effects</b> | <b># reporting harmful effects</b> | <b># reporting mixed effects</b> | <b># reporting no effect</b> | <b>Article # (See Included Studies)</b>                                                                                                                                              | <b>Average quality score</b> |
|--------------------------------------------------------------------------------------------|---------------------------|---------------------------------------|------------------------------------|----------------------------------|------------------------------|--------------------------------------------------------------------------------------------------------------------------------------------------------------------------------------|------------------------------|
| <b>Driving under the influence or with detectable concentrations, other drug/alcohol</b>   | 3                         | 0                                     | 0                                  | 1                                | 2                            | 42, 58, 98                                                                                                                                                                           | 14.5                         |
| <b>Mental health conditions, suicide, or self-harm</b>                                     | 4                         | 0                                     | 1                                  | 2                                | 1                            | 4, 29, 30, 37                                                                                                                                                                        | 15.0                         |
| <b>Mode of use, decriminalized/regulated drug</b>                                          | 1                         | 0                                     | 0                                  | 0                                | 1                            | 39                                                                                                                                                                                   | 13.0                         |
| <b>Opioid therapy compliance</b>                                                           | 1                         | 0                                     | 0                                  | 0                                | 1                            | 63                                                                                                                                                                                   | N/A                          |
| <b>Overdose or poisoning (incl. unintentional exposures) decriminalized/regulated drug</b> | 7                         | 0                                     | 7                                  | 0                                | 0                            | 10, 12, 75, 76, 108, 109                                                                                                                                                             | 13.3                         |
| <b>Overdose or poisoning, other drugs</b>                                                  | 7                         | 4                                     | 0                                  | 2                                | 1                            | 9, 10, 62, 80, 83, 88, 96                                                                                                                                                            | 15.6                         |
| <b>Perceived availability, decriminalized/regulated drug</b>                               | 9                         | 0                                     | 2                                  | 2                                | 5                            | 27, 39, 53, 60, 65, 68, 71, 92, 112                                                                                                                                                  | 14.1                         |
| <b>Perceived harmfulness, decriminalized/regulated drug</b>                                | 12                        | 1                                     | 2                                  | 6                                | 3                            | 18, 22, 30, 38, 39, 52, 59, 60, 71, 92, 106, 112                                                                                                                                     | 13.9                         |
| <b>Physical health consequences of use, decriminalized/regulated drug</b>                  | 1                         | 0                                     | 0                                  | 0                                | 1                            | 104                                                                                                                                                                                  | N/A                          |
| <b>Potency, decriminalized/regulated drug</b>                                              | 1                         | 0                                     | 0                                  | 0                                | 1                            | 93                                                                                                                                                                                   | 16.0                         |
| <b>Prescription drug use (medical use)</b>                                                 | 9                         | 6                                     | 0                                  | 1                                | 2                            | 15, 16, 17, 56, 61, 83, 94, 110                                                                                                                                                      | 16.3                         |
| <b>Prevalence of use, decriminalized/regulated drug</b>                                    | 50                        | 2                                     | 13                                 | 11                               | 24                           | 1, 2, 6, 18, 20, 21, 22, 24, 27, 28, 34, 35, 36, 38, 39, 40, 41, 46, 48, 49, 50, 51, 52, 53, 63, 64, 65, 66, 68, 69, 70, 71, 72, 78, 79, 81, 84, 87, 89, 99, 100, 105, 106, 111, 113 | 14.6                         |

| <b>Outcomes</b>                                            | <b>Number of outcomes</b> | <b># reporting beneficial effects</b> | <b># reporting harmful effects</b> | <b># reporting mixed effects</b> | <b># reporting no effect</b> | <b>Article # (See Included Studies)</b>                 | <b>Average quality score</b> |
|------------------------------------------------------------|---------------------------|---------------------------------------|------------------------------------|----------------------------------|------------------------------|---------------------------------------------------------|------------------------------|
| <b>Prevalence or frequency of use, other drugs/alcohol</b> | 21                        | 2                                     | 2                                  | 6                                | 11                           | 18, 21, 35, 47, 49, 50, 53, 57, 60, 66, 72, 83, 99, 111 | 15.6                         |
| <b>Price of drugs</b>                                      | 5                         | 0                                     | 1                                  | 1                                | 3                            | 3, 31, 32, 45, 77                                       | 14.0                         |
| <b>Substance use disorder or diagnosed dependence</b>      | 5                         | 0                                     | 1                                  | 2                                | 2                            | 40, 59, 69, 111, 113                                    | 14.6                         |
| <b>Workplace absence</b>                                   | 1                         | 1                                     | 0                                  | 0                                | 0                            | 102                                                     | 16.0                         |

For peer review only

## Appendix A: Search Strategy and Results

Database: Ovid MEDLINE: Epub Ahead of Print, In-Process & Other Non-Indexed Citations,  
Ovid MEDLINE® Daily and Ovid MEDLINE® <1946-Present>  
Search Strategy:

-----

1 ((Marijuana or marihuana or cannabis or cannabinoid\* or psychoactive product\* or  
2 psychoactive substances\* or narcotic\*) adj5 (Legaliz\* or legalis\* or decriminal\* or depenaliz\* or  
3 depenalis\* or deregulat\* or liberaliz\* or liberalis\*)).tw,kf.  
4  
5  
6  
7  
8 1 ((marijuana or marihuana or cannabis or cannabinoid\*) adj1 (policy or policies or law or  
9 laws or licens\* or legislation or dispensar\* or store or stores or regulat\* or recreational or  
10 medical or medicinal or nonmedical or legal\*)).tw,kf.  
11  
12 2 ((legal high or legal highs).tw,kf.  
13  
14 3 Psychoactive Substances Act.tw,kf.  
15  
16 4 2 or 3 or 4  
17  
18 5 new psychoactive product\*.tw,kf.  
19  
20 6 novel psychoactive product\*.tw,kf.  
21  
22 7 novel psychoactive substance\*.tw,kf.  
23  
24 8 new psychoactive substance\*.tw,kf.  
25  
26 9 novel psychoactive drug\*.tw,kf.  
27  
28 10 new psychoactive substances\*.tw,kf.  
29  
30 11 Designer Drugs/sd [Supply & Distribution]  
31  
32 12 Medical Marijuana/sd [Supply & Distribution]  
33  
34 13 exp Street Drugs/lj, sd [Legislation & Jurisprudence, Supply & Distribution]  
35  
36 14 Marijuana Smoking/lj [Legislation & Jurisprudence]  
37  
38 15 Drug Users/lj, sn [Legislation & Jurisprudence, Statistics & Numerical Data]  
39  
40 16 "Drug and Narcotic Control"/lj [Legislation & Jurisprudence]  
41  
42 17 or/6-17  
43  
44 18 (Legal\* or decriminal\* or depenaliz\* or depenalis\* or deregulat\* or liberaliz\* or liberalis\*  
45 or policy or policies or law or laws or licens\* or legislation or regulat\*).ti.  
46  
47 19 18 and 19  
48  
49 20 5 or 20  
50  
51 21 limit 21 to (clinical study or clinical trial, all or comparative study or evaluation studies or  
52 meta analysis or multicenter study or observational study or pragmatic clinical trial or systematic  
53 reviews or validation studies)  
54  
55 22 Epidemiologic studies/  
56  
57 23 exp case control studies/  
58  
59 24 exp cohort studies/  
60  
61 25 Case control.tw.  
62  
63 26 (cohort adj (study or studies)).tw.  
64  
65 27 Cohort analy\$.tw.  
66  
67 28 (Follow up adj (study or studies)).tw.  
68  
69 29 (observational adj (study or studies)).tw.  
70  
71 30 Longitudinal.tw.  
72  
73 31 Retrospective.tw.  
74  
75 32 Cross sectional.tw.  
76  
77 33 Cross-sectional studies/  
78  
79  
80



## Appendix A: Search Strategy and Results

35 or/23-34 [ Observational Studies search filter used by SIGN (Scottish Intercollegiate  
 Guidelines Network <http://www.sign.ac.uk/methodology/filters.html#obs> ]  
 36 21 and 35  
 37 exp Epidemiologic Methods/  
 38 amphetamine-related disorders/ep or cocaine-related disorders/ep or drug overdose/ep or  
 9 inhalant abuse/ep or marijuana abuse/ep or exp opioid-related disorders/ep or phencyclidine  
 10 abuse/ep or psychoses, substance-induced/ep or substance abuse, intravenous/ep  
 11 Prevalence/  
 12 Incidence/ or incidence.ti,ab,kw.  
 13 (harm or harms).tw,kf.  
 14 ("marijuana use" or "marijuana availability" or "cannabis use" or cannabis availability or  
 15 "drug use").tw,kf.  
 16 or/37-42  
 17 21 and 43  
 18 1 or 22 or 36 or 44  
 19 45 not (exp animals/ not humans.sh.)  
 20 limit 46 to (comment or editorial or letter)  
 21 46 not 47  
 22 limit 48 to yr="1970 -Current"

| Database                                                                                                                                                                                              | Number of Results |
|-------------------------------------------------------------------------------------------------------------------------------------------------------------------------------------------------------|-------------------|
| Medline (OVID)                                                                                                                                                                                        | 2041              |
| Embase (OVID)                                                                                                                                                                                         | 1453              |
| PsycINFO (OVID)                                                                                                                                                                                       | 1393              |
| Web of Science:<br>Science Citation Index<br>Social Sciences Citation Index<br>Conference Proceedings Citation Index- Science<br>Conference Proceedings Citation Index- Social Science & Humanities   | 1358              |
| Criminal Justice Abstracts (EBSCO)                                                                                                                                                                    | 1074              |
| ProQuest Databases:<br>Applied Social Sciences Index & Abstracts (ASSIA),<br>International Bibliography of the Social Sciences (IBSS),<br>PAIS Index,<br>Policy File Index,<br>Sociological Abstracts | 910               |
| Total Number of Results                                                                                                                                                                               | <b>8229</b>       |
| Total number of results after duplicates removed in EndNote                                                                                                                                           | <b>4860</b>       |

## Appendix B: Quality Appraisal Checklist

**Adapted from:** Downs SH, Black N. The feasibility of creating a checklist for the assessment of the methodological quality both of randomised and non-randomised studies of health care interventions. *J Epidemiol Community Health*. 1998;52(6):377-384.

1. Is the hypothesis/aim/objective of the study clearly described?

Yes (1)

No (0)

2. Are the main outcomes to be measured clearly described in the Introduction or Methods section? *If the main outcomes are first mentioned in the Results section, the question should be answered no.*

Yes (1)

No (0)

3. Are the characteristics of the individuals included in the study clearly described? In cohort studies and trials, inclusion and/or exclusion criteria should be given.

Yes (1)

No (0)

4. Are the interventions of interest clearly described?

Yes (1)

No (0)

5. Are the distributions of principal confounders in each group of subjects to be compared clearly described?

Yes (2)

Partially (1)

No (0)

6. Are the main findings of the study clearly described? *Simple outcome data (including denominators and numerators) should be reported for all major findings so that the reader can check the major analyses and conclusions. (This question does not cover statistical tests which are considered below).*

Yes (1)

No (0)

7. Does the study provide estimates of the random variability in the data for the main outcome (e.g., IQR, standard deviation, confidence interval, etc.)?

Yes (1)

No (0)

N/A [there is no variability because data come from the entire population] (1)

## Appendix B: Quality Appraisal Checklist

8. Have actual probability values been reported (e.g. 0.035 rather than  $<0.05$ ) for the main outcomes except where the probability value is less than 0.001? (*Confidence intervals are acceptable in place of p-values*)

Yes (1)

No (0)

9. Were the subjects that were asked to participate in the study representative of the entire population from which they were recruited? *The study must identify the source population for participants and describe how they were selected. Participants would be representative if they comprised the entire source population or a random sample. Random sampling is only feasible where a list of all members of the relevant population exists.*

Yes (1)

No (0)

Unable to determine (0)

10. Were those subjects who agreed to participate representative of the entire population from which they were recruited? *The proportion of those asked who agreed should be stated. Validation that the sample was representative would include demonstrating that the distribution of the main confounding factors was the same in the study sample and the source population.*

Yes (1)

No (0)

Unable to determine (0)

11. If any of the results of the study were based on “data dredging”, was this made clear? *Any analyses that had not been planned at the outset of the study should be clearly indicated. If no retrospective unplanned subgroup analyses were reported, then answer yes.*

Yes (1)

No (0)

Unable to determine (0)

12. In trials and cohort studies, do the analyses adjust for different lengths of follow-up of participants, or in case-control studies, is the time period between the intervention and outcome the same for cases and controls? *Where follow-up was the same for all study participants the answer should be yes. If different lengths of follow-up were adjusted for by, for example, survival analysis the answer should be yes. Studies where differences in follow-up are ignored should be answered no.*

Yes or N/A (1)

No (0)

Unable to determine (0)

13. Were the statistical tests used to assess the main outcomes appropriate? *The statistical techniques used must be appropriate to the data. For example non-parametric methods should be used for small sample sizes. Where little statistical analysis has been undertaken but where there is no evidence of bias, the question should be answered yes. If the distribution of the data*

## Appendix B: Quality Appraisal Checklist

(normal or not) is not described it must be assumed that the estimates used were appropriate and the question should be answered yes.

Yes (1)

No (0)

Unable to determine from article (0)

14. Were the main outcome measures used accurate (valid and reliable)? *For studies where the outcome measures are clearly described, the question should be answered yes. For studies which refer to other work or that demonstrates the outcome measures are accurate, the question should be answered as yes.*

Yes (1)

No (0)

Unable to determine (0)

15. Were the participants in different comparison groups recruited from the same population or from comparable populations? *Answer NO for studies without a comparison/control group.*

Yes (1)

No (0)

Unable to determine (0)

16. Were study subjects in different intervention groups recruited over the same period of time? *Answer NO for studies without a comparison/control group.*

Yes (1)

No (0)

Unable to determine (0)

17. Was there adequate adjustment for confounding in the analyses from which the main findings were drawn?

Yes (1)

No (0)

Unable to determine (0)

## Appendix C: Included Studies

## INCLUDED STUDIES

1. Adam C, Raschzok A. Cannabis policy and the uptake of treatment for cannabis-related problems. *Drug Alcohol Rev.* 2017;36(2):171-177.
2. Allshouse AA, Metz TD. Trends in self-reported and urine toxicology (UTOX)-detected maternal marijuana use before and after legalization. *Am J Obstet Gynecol.* 2016;1:S444-S445.
3. Anderson DM, Hansen B, Rees DI. Medical marijuana laws, traffic fatalities, and alcohol consumption. *J Law Econ.* 2013;56(2):333-369.
4. Anderson DM, Rees DI, Sabia JJ. Medical marijuana laws and suicides by gender and age. *Am J Public Health.* 2014;104(12):2369-2376.
5. Anderson DM, Rees DI, Tekin E. Medical marijuana laws and workplace fatalities in the United States. *Int J Drug Policy.* 2018;60:33-39.
6. Anderson MD, Hansen B, Rees DI. Medical marijuana laws and teen marijuana use. *Am Law Econ Rev.* 2015;17(2):495-528.
7. Arredondo J, Gaines T, Manian S, et al. The law on the streets: evaluating the impact of Mexico's drug decriminalization reform on drug possession arrests in Tijuana, Mexico. *Int J Drug Policy.* 2018;54:1-8. doi:10.1016/j.drugpo.2017.12.006.
8. Aydelotte JD, Brown LH, Luftman KM, et al. Crash fatality rates after recreational marijuana legalization in Washington and Colorado. *Am J Public Health.* 2017;107(8):1329-1331.
9. Bachhuber MA, Saloner B, Cunningham CO, Barry CL. Medical cannabis laws and opioid analgesic overdose mortality in the United States, 1999-2010. *JAMA Intern Med.* 2014;174(10):1668-1673.
10. Banerji S, Hoyte C. Marijuana and synthetic cannabinoid patterns in a US state with legalized marijuana: a 5-year NPDS review. *Clin Toxicol.* 2017;55 (5):418-419.
11. Bell C, Slim J, Flaten HK, Lindberg G, Arek W, Monte AA. Butane hash oil burns associated with marijuana liberalization in Colorado. *J Med Toxicol.* 2015;11(4):422-425.
12. Bjordal M, Garrard A. The impact of marijuana legalization on poison center calls in the evergreen state. *Clin Toxicol.* 2015;53(7):694.
13. Blachly PH. Effects of decriminalization of marijuana in Oregon. *Ann N Y Acad Sci.* 1976;282:405-415.
14. Boyle C. Butane hash oil manufacturing related burn injury: a disturbing trend. *J Burn Care Res.* 2014;35:S112.
15. Bradford AC, Bradford WD. Medical marijuana laws reduce prescription medication use in Medicare Part D. *Health Aff.* 2016;35(7):1230-1236.
16. Bradford AC, Bradford WD, Abraham A, Bagwell Adams G. Association between US state medical cannabis laws and opioid prescribing in the Medicare Part D population. *JAMA Intern Med.* 2018;178(5):667-672.
17. Bradford AC, Bradford WD. Medical marijuana laws may be associated with a decline in the number of prescriptions for Medicaid enrollees. *Health Aff.* 2017;36(5):945-951.
18. Brooks-Russell A, Ma M, Levinson AH, et al. Adolescent marijuana use, marijuana-related perceptions, and use of other substances before and after initiation of retail marijuana sales in Colorado (2013-2015). *Prev Sci.* 2019;20(2):185-193.
19. Calcaterra SL, Keniston A, Hull ML. The impact of the legalization of recreational marijuana on a safety-net health system. *J Gen Intern Med.* 2018;33(S2):S361.

## Appendix C: Included Studies

20. Cassidy TA, Green T, Garg P, Butler SF. Up in smoke? Marijuana initiation and prevalence trends in Colorado: 2008 to 2014. *Drug Alcohol Depend.* 2015;156:e39.
21. Cerda M, Sarvet AL, Wall M, et al. Medical marijuana laws and adolescent use of marijuana and other substances: alcohol, cigarettes, prescription drugs, and other illicit drugs. *Drug Alcohol Depend.* 2018;183:62-68.
22. Cerda M, Wall M, Feng T, et al. Association of state recreational marijuana laws with adolescent marijuana use. *JAMA Pediatr.* 2017;171(2):142-149.
23. Cervený J, Chomynova P, Mravčík V, van Ours JC. Cannabis decriminalization and the age of onset of cannabis use. *Int J Drug Policy.* 2017;43:122-129.
24. Choo EK, Benz M, Zaller N, Warren O, Rising KL, McConnell KJ. The impact of state medical marijuana legislation on adolescent marijuana use. *J Adolesc Health.* 2014;55(2):160-166.
25. Chu YW. The effects of medical marijuana laws on illegal marijuana use. *J Health Econ.* 2014;38:43-61.
26. Couper FJ, Peterson BL. The prevalence of marijuana in suspected impaired driving cases in Washington state. *J Anal Toxicol.* 2014;38(8):569-574.
27. Donnelly N, Hall W, Christie P. The effects of partial decriminalisation on cannabis use in South Australia, 1985 to 1993. *Aust J Public Health.* 1995;19(3):281-287.
28. Donnelly N, Hall W, Christie P. The effects of the Cannabis Expiation Notice System on the prevalence of cannabis use in South Australia: evidence from the National Drug Strategy Household Surveys 1985-95. *Drug Alcohol Rev.* 2000;19(3):265-269.
29. Dutra LM, Parish WJ, Gourdet CK, Wylie SA, Wiley JL. Medical cannabis legalization and state-level prevalence of serious mental illness in the National Survey on Drug Use and Health (NSDUH) 2008-2015. *Int Rev Psychiatry.* 2018;30(3):203-215.
30. Estoup AC, Moise-Campbell C, Varma M, Stewart DG. The impact of marijuana legalization on adolescent use, consequences, and perceived risk. *Subst Use Misuse.* 2016;51(14):1881-1887.
31. Feige C, Miron JA. The opium wars, opium legalization and opium consumption in China. *Appl Econ Lett.* 2008;15(12):911-913.
32. Félix S, Portugal P. Drug decriminalization and the price of illicit drugs. *Int J Drug Policy.* 2017;39:121-129.
33. Gonçalves R, Lourenço A, da Silva SN. A social cost perspective in the wake of the Portuguese strategy for the fight against drugs. *Int J Drug Policy.* 2015;26(2):199-209.
34. Gorman DM, Huber Jr JC. Do medical cannabis laws encourage cannabis use? *Int J Drug Policy.* 2007;18(3):160-167.
35. Grant TM, Graham JC, Carlini BH, Ernst CC, Brown NN. Use of marijuana and other substances among pregnant and parenting women with substance use disorders: changes in Washington state after marijuana legalization. *J Stud Alcohol Drugs.* 2018;79(1):88-95.
36. Grucza RA, Vuolo M, Krauss MJ, et al. Cannabis decriminalization: a study of recent policy change in five U.S. states. *Int J Drug Policy.* 2018;59:67-75.
37. Grucza RA, Hur M, Agrawal A, et al. A reexamination of medical marijuana policies in relation to suicide risk. *Drug Alcohol Depend.* 2015;152:68-72.
38. Harper S, Strumpf EC, Kaufman JS. Do medical marijuana laws increase marijuana use? Replication study and extension. *Ann Epidemiol.* 2012;22(3):207-212.



## Appendix C: Included Studies

- 1
  - 2
  - 3
  - 4
  - 5
  - 6
  - 7
  - 8
  - 9
  - 10
  - 11
  - 12
  - 13
  - 14
  - 15
  - 16
  - 17
  - 18
  - 19
  - 20
  - 21
  - 22
  - 23
  - 24
  - 25
  - 26
  - 27
  - 28
  - 29
  - 30
  - 31
  - 32
  - 33
  - 34
  - 35
  - 36
  - 37
  - 38
  - 39
  - 40
  - 41
  - 42
  - 43
  - 44
  - 45
  - 46
  - 47
  - 48
  - 49
  - 50
  - 51
  - 52
  - 53
  - 54
  - 55
  - 56
  - 57
  - 58
  - 59
  - 60
39. Harpin SB, Brooks-Russell A, Ma M, James KA, Levinson AH. adolescent marijuana use and perceived ease of access before and after recreational marijuana implementation in Colorado. *Subst Use Misuse*. 2018;53(3):451-456.
40. Hasin DS, Sarvet AL, Cerda M, et al. US adult illicit cannabis use, cannabis use disorder, and medical marijuana laws: 1991-1992 to 2012-2013. *JAMA Psychiatry*. 2017;74(6):579-588.
41. Hasin DS, Wall M, Keyes KM, et al. Medical marijuana laws and adolescent marijuana use in the USA from 1991 to 2014: results from annual, repeated cross-sectional surveys. *Lancet Psychiatry*. 2015;2(7):601-608.
42. Hasin D, Sarvet A, Cerda M, Keyes KM, Fink DS. Driving under the influence of alcohol or cannabis in the U.S., 1991-1992 to 2012-2013: relationship to state medical marijuana laws. *Alcohol Clin Exp Res*. 2017;41:250A.
43. Hoyte CO, Caruso J. The prevalence of marijuana in fatalities involving operators of motor vehicles in Denver County, Colorado, USA. *Clin Toxicol*. 2015;53(4):268.
44. Huber A, Newman R, LaFave D. Cannabis control and crime: medicinal use, depenalization and the war on drugs. *BE Journal of Economic Analysis & Policy*. 2016;16(4). doi:10.1515/bejeap-2015-0167
45. Hunt P, Pacula RL. early impacts of marijuana legalization: an evaluation of prices in Colorado and Washington. *J Prim Prev*. 2017;38(3):221-248.
46. Johnson J, Hodgkin D, Harris SK. The design of medical marijuana laws and adolescent use and heavy use of marijuana: analysis of 45 states from 1991 to 2011. *Drug Alcohol Depend*. 2017;170:1-8.
47. Jones J, Jones KN, Peil J. The impact of the legalization of recreational marijuana on college students. *Addict Behav*. 2018;77:255-259.
48. Jones JT, Baldwin A, Shu I. A comparison of meconium screening outcomes as an indicator of the impact of state-level relaxation of marijuana policy. *Drug Alcohol Depend*. 2015;156:e104-e105.
49. Kerr DCR, Bae H, Koval AL. Oregon recreational marijuana legalization: changes in undergraduates' marijuana use rates from 2008 to 2016. *Psychol Addict Behav*. 2018;32(6):670-678.
50. Kerr DCR, Bae H, Phibbs S, Kern AC. Changes in undergraduates' marijuana, heavy alcohol and cigarette use following legalization of recreational marijuana use in Oregon. *Addiction*. 2017;112(11):1992-2001. doi:10.1111/add.13906
51. Kerr WC, Lui C, Ye Y. Trends and age, period and cohort effects for marijuana use prevalence in the 1984-2015 US National Alcohol Surveys. *Addiction*. 2018;113(3):473-481. doi:10.1111/add.14031
52. Keyes KM, Wall M, Cerda M, et al. How does state marijuana policy affect US youth? Medical marijuana laws, marijuana use and perceived harmfulness: 1991-2014. *Addiction*. 2016;111(12):2187-2195.
53. Khatapoush S, Hallfors D. "Sending the wrong message": did medical marijuana legalization in California change attitudes about and use of marijuana? *J Drug Issues*. 2004;34(4):751-770.
54. Kim HS, Anderson JD, Saghafi O, Heard KJ, Monte AA. Cyclic vomiting presentations following marijuana liberalization in Colorado. *Acad Emerg Med*. 2015;22(6):694-699.
55. Kim HS, Hall KE, Genco EK, Van Dyke M, Barker E, Monte AA. Marijuana tourism and emergency department visits in Colorado. *N Engl J Med*. 2016;374(8):797-798.



## Appendix C: Included Studies

- 1
  - 2
  - 3
  - 4
  - 5
  - 6
  - 7
  - 8
  - 9
  - 10
  - 11
  - 12
  - 13
  - 14
  - 15
  - 16
  - 17
  - 18
  - 19
  - 20
  - 21
  - 22
  - 23
  - 24
  - 25
  - 26
  - 27
  - 28
  - 29
  - 30
  - 31
  - 32
  - 33
  - 34
  - 35
  - 36
  - 37
  - 38
  - 39
  - 40
  - 41
  - 42
  - 43
  - 44
  - 45
  - 46
  - 47
  - 48
  - 49
  - 50
  - 51
  - 52
  - 53
  - 54
  - 55
  - 56
  - 57
  - 58
  - 59
  - 60
56. Kim JH, Santaella J, Cerda M, Martins SS. Medical marijuana laws and annual opioid analgesic sales in the United States. *Drug Alcohol Depend.* 2015;156:e111.
57. Kim JH, Santaella J, Mauro PM, et al. Nonmedical use of prescription opioids and medical marijuana laws in the US from 2004-2013. *Drug Alcohol Depend.* 2017;171:e102-e103.
58. Kim JH, Santaella-Tenorio J, Mauro C, et al. State medical marijuana laws and the prevalence of opioids detected among fatally injured drivers. *Am J Public Health.* 2016;106(11):2032-2037.
59. Kosterman R, Bailey JA, Guttmannova K, et al. Marijuana legalization and parents' attitudes, use, and parenting in Washington state. *J Adolesc Health.* 2016;59(4):450-456.
60. Larimer ME, Lee CM, Kilmer JR, Rhew I, Fossos-Wong N. Risk perception, access, and use of marijuana among young adults following legalization in Washington state. *Alcohol Clin Exp Res.* 2015;39:261A.
61. Liang D, Bao Y, Wallace M, Grant I, Shi Y. Medical cannabis legalization and opioid prescriptions: evidence on US Medicaid enrollees during 1993-2014. *Addiction.* 2018;113(11):2060-2070.
62. Livingston MD, Barnett TE, Delcher C, Wagenaar AC. Recreational cannabis legalization and opioid-related deaths in Colorado, 2000-2015. *Am J Public Health.* 2017;107(11):1827-1829.
63. Lo SY, Baird GS, Hoofnagle A, Greene DN. THC use and marijuana legalization do not influence chronic opioid therapy compliance. *Am J Clin Pathol.* 2015;143:A046.
64. Lynne-Landsman SD, Livingston MD, Wagenaar AC. Effects of state medical marijuana laws on adolescent marijuana use. *Am J Public Health.* 2013;103(8):1500-1506.
65. Martins SS, Mauro CM, Santaella-Tenorio J, et al. State-level medical marijuana laws, marijuana use and perceived availability of marijuana among the general U.S. population. *Drug Alcohol Depend.* 2016;169:26-32.
66. Mason W, Fleming CB, Ringle JL, Hanson K, Gross TJ, Haggerty KP. Prevalence of marijuana and other substance use before and after Washington State's change from legal medical marijuana to legal medical and nonmedical marijuana: cohort comparisons in a sample of adolescents. *Subst Abus.* 2016;37(2):330-335.
67. Masten SV, Guenzburger GV. Changes in driver cannabinoid prevalence in 12 US states after implementing medical marijuana laws. *J Safety Res.* 2014;50:35-52.
68. Mauro C, Santaella J, Kim JH, Wall MM, Martins SS. Does perceived availability of marijuana explain changes in marijuana use after medical marijuana law implementation among U.S. adults? *Drug Alcohol Depend.* 2017;171:e134.
69. Mauro CM, Newswanger P, Santaella-Tenorio J, Mauro PM, Carliner H, Martins SS. Impact of medical marijuana laws on state-level marijuana use by age and gender, 2004-2013. *Prev Sci.* 2019;20(2):205-214. doi:10.1007/s11121-017-0848-3
70. Merker AM, Riaz M, Friedman S, Allegretti JR, Korzenik J. Legalization of medicinal marijuana has minimal impact on use patterns in patients with inflammatory bowel disease. *Inflamm Bowel Dis.* 2018;24(11):2309-2314.
71. Miech R, Johnston LA, O'Malley P, Bachman J, Schulenberg J, Patrick M. Trends in use of and attitudes toward marijuana among youth before and after decriminalization: the case of California 2007-2013. *Drug Alcohol Depend.* 2015;156:e151-e152.
72. Miller AM, Rosenman R, Cowan BW. Recreational marijuana legalization and college student use: early evidence. *SSM Popul Health.* 2017;3:649-657.

## Appendix C: Included Studies

73. Model KE. The effect of marijuana decriminalization on hospital emergency room drug episodes: 1975-1978. *J Am Stat Assoc.* 1993;88(423):737-747.
74. Morris RG, TenEyck M, Barnes JC, Kovandzic TV. The effect of medical marijuana laws on crime: evidence from state panel data, 1990-2006. *PloS One.* 2014;9(3):e92816.
75. Nappe T, Banerji S, Hoyte C. Drug exposure trends since decriminalization of marijuana in Colorado. *Clin Toxicol.* 2016;54(8):712-713.
76. Onders B, Casavant MJ, Spiller HA, Chounthirath T, Smith GA. Marijuana exposure among children younger than six years in the United States. *Clin Pediatr.* 2016;55(5):428-436.
77. Pacula RL, Kilmer B, Grossman M, Chaloupka FJ. Risks and prices: the role of user sanctions in marijuana markets. *BE Journal of Economic Analysis & Policy.* 2010;10(1).
78. Pacula RL, Powell D, Heaton P, Sevigny EL. Assessing the effects of medical marijuana laws on marijuana use: the devil is in the details. *J Policy Anal Manage.* 2015;34(1):7-31.
79. Parnes JE, Smith JK, Conner BT. Reefer madness or much ado about nothing? Cannabis legalization outcomes among young adults in the United States. *Int J Drug Policy.* 2018;56:116-120.
80. Phillips E, Gazmararian J. Implications of prescription drug monitoring and medical cannabis legislation on opioid overdose mortality. *J Opioid Manag.* 2017;13(4):229-239.
81. Plunk AD, Agrawal A, Harrell PT, et al. The impact of adolescent exposure to medical marijuana laws on high school completion, college enrollment and college degree completion. *Drug Alcohol Depend.* 2016;168:320-327.
82. Pollini RA, Romano E, Johnson MB, Lacey JH. The impact of marijuana decriminalization on California drivers. *Drug Alcohol Depend.* 2015;150:135-140.
83. Powell D, Pacula RL, Jacobson M. Do medical marijuana laws reduce addictions and deaths related to pain killers? *J Health Econ.* 2018;58:29-42.
84. Prue B. Prevalence of reported peyote use 1985-2010 effects of the American Indian Religious Freedom Act of 1994. *Am J Addict.* 2014;23(2):156-161.
85. Ramirez A. Marijuana, other drugs, and alcohol use by drivers in Washington state. *Alcohol Clin Exp Res.* 2017;41:314A.
86. Reith I. Two plants are better than one? *Contemp Drug Probl.* 2015;42(4):259-273.
87. Rodriguez CE, Sheeder J, Metz TD. Marijuana use in pregnant teens before and after legalization. *Reprod Sci.* 2016;1:282A.
88. Rohda J, Smith K, Smith L, Jacobitz K, Kirschner R. Impact of recreational marijuana legalization on synthetic cannabinoid use. *Clin Toxicol.* 2017;55(7):780.
89. Rusby JC, Westling E, Crowley R, Light JM. Legalization of recreational marijuana and community sales policy in Oregon: impact on adolescent willingness and intent to use, parent use, and adolescent use. *Psychol Addict Behav.* 2018;32(1):84-92.
90. Sabia JJ, Swigert J, Young T. The effect of medical marijuana laws on body weight. *Health Econ.* 2017;26(1):6-34.
91. Santaella-Tenorio J, Mauro CM, Wall MM, et al. US traffic fatalities, 1985-2014, and their relationship to medical marijuana laws. *Am J Public Health.* 2017;107(2):336-342.
92. Schmidt LA, Jacobs LM, Spetz J. Young people's more permissive views about marijuana: local impact of state laws or national trend? *Am J Public Health.* 2016;106(8):1498-1503.
93. Sevigny EL, Pacula RL, Heaton P. The effects of medical marijuana laws on potency. *Int J Drug Policy.* 2014;25(2):308-319.

## Appendix C: Included Studies

94. Shah AB, Hayes CJ, Lakkad M, Martin BC. Impact of medical marijuana legalization on opioid use, chronic opioid use and high-risk opioid use. *Value Health*. 2018;21(S1):S247.
95. Shepard EM, Blackley PR. Medical marijuana and crime: further evidence from the western states. *J Drug Issues*. 2016;46(2):122-134.
96. Shi Y. Medical marijuana policies and hospitalizations related to marijuana and opioid pain reliever. *Drug Alcohol Depend*. 2017;173:144-150.
97. Sokoya M, Eagles J, Okland T, et al. Patterns of facial trauma before and after legalization of marijuana in Denver, Colorado: a joint study between two Denver hospitals. *Am J Emerg Med*. 2018;36(5):780-783.
98. Steinemann S, Galanis D, Nguyen T, Biffi W. Motor vehicle crash fatalities and undercompensated care associated with legalization of marijuana. *J Trauma Acute Care Surg*. 2018;85(3):566-571.
99. Stolzenberg L, D'Alessio SJ, Dariano D. The effect of medical cannabis laws on juvenile cannabis use. *Int J Drug Policy*. 2016;27:82-88.
100. Straub H, Drennan KJ, Pflugeisen B. Maternal marijuana use: a natural experiment from prohibition to access. *Am J Obstet Gynecol*. 2017;216(S1):S554-S555.
101. Suggs DL. A qualitative and quantitative analysis of the impact of Nebraska's decriminalization of marijuana. *Law Hum Behav*. 1981;5(1):45-71.
102. Ullman DF. The effect of medical marijuana on sickness absence. *Health Econ*. 2017;26(10):1322-1327.
103. Urfer S, Morton J, Beall V, Feldmann J, Gunesch J. Analysis of DELTA9-tetrahydrocannabinol driving under the influence of drugs cases in Colorado from January 2011 to February 2014. *J Anal Toxicol*. 2014;38(8):575-581.
104. Wagner J, Leonard J, Jensen J, et al. The impact of marijuana legalization on reversible cerebral vasoconstriction syndrome. *Neurology*. 2016;86(S16):115.
105. Wall MM, Mauro C, Hasin DS, et al. Prevalence of marijuana use does not differentially increase among youth after states pass medical marijuana laws: commentary on Stolzenberg et al. (2015) and reanalysis of US National Survey on Drug Use in Households data 2002-2011. *Int J Drug Policy*. 2016;29:9-13.
106. Wall MM, Poh E, Cerda M, Keyes KM, Galea S, Hasin DS. Adolescent marijuana use from 2002 to 2008: higher in states with medical marijuana laws, cause still unclear. *Ann Epidemiol*. 2011;21(9):714-716.
107. Wang GS, Davies SD, Halmo LS, Sass A, Mistry RD. Impact of marijuana legalization in Colorado on adolescent emergency and urgent care visits. *J Adolesc Health*. 2018;63(2):239-241.
108. Wang GS, Hall K, Vigil D, Banerji S, Monte A, VanDyke M. Marijuana and acute health care contacts in Colorado. *Prev Med*. 2017;104:24-30.
109. Wang GS, Le Lait MC, Deakyne SJ, Bronstein AC, Bajaj L, Roosevelt G. Unintentional pediatric exposures to marijuana in Colorado, 2009-2015. *JAMA Pediatr*. 2016;170(9):e160971.
110. Wen H, Hockenberry JM. Association of medical and adult-use marijuana laws with opioid prescribing for Medicaid enrollees. *JAMA Intern Med*. 2018;178(5):673-679.
111. Wen H, Hockenberry JM, Cummings JR. The effect of medical marijuana laws on adolescent and adult use of marijuana, alcohol, and other substances. *J Health Econ*. 2015;42:64-80.

## Appendix C: Included Studies

- 1  
2  
3  
4  
5  
6  
7  
8  
9  
10  
11  
12  
13  
14  
15  
16  
17  
18  
19  
20  
21  
22  
23  
24  
25  
26  
27  
28  
29  
30  
31  
32  
33  
34  
35  
36  
37  
38  
39  
40  
41  
42  
43  
44  
45  
46  
47  
48  
49  
50  
51  
52  
53  
54  
55  
56  
57  
58  
59  
60
112. Wen H, Hockenberry JM, Druss BG. The effect of medical marijuana laws on marijuana-related attitude and perception among us adolescents and young adults. *Prev Sci.* 2019;20(2):215-223.
  113. Williams AR, Santaella-Tenorio J, Mauro CM, Levin FR, Martins SS. Loose regulation of medical marijuana programs associated with higher rates of adult marijuana use but not cannabis use disorder. *Addiction.* 2017;112(11):1985-1991.
  114. Williams J, Bretteville-Jensen AL. Does liberalizing cannabis laws increase cannabis use? *J Health Econ.* 2014;36:20-32.

# Reporting checklist for systematic review and meta-analysis.

Based on the PRISMA guidelines.

## Instructions to authors

Complete this checklist by entering the page numbers from your manuscript where readers will find each of the items listed below.

Your article may not currently address all the items on the checklist. Please modify your text to include the missing information. If you are certain that an item does not apply, please write "n/a" and provide a short explanation.

Upload your completed checklist as an extra file when you submit to a journal.

In your methods section, say that you used the PRISMA reporting guidelines, and cite them as:

Moher D, Liberati A, Tetzlaff J, Altman DG, The PRISMA Group. Preferred Reporting Items for Systematic Reviews and Meta-Analyses: The PRISMA Statement

|                     | Reporting Item                                                                                                                                                                                                                                                                                                                | Page Number |
|---------------------|-------------------------------------------------------------------------------------------------------------------------------------------------------------------------------------------------------------------------------------------------------------------------------------------------------------------------------|-------------|
| <b>Title</b>        |                                                                                                                                                                                                                                                                                                                               |             |
|                     | <a href="#">#1</a> Identify the report as a systematic review, meta-analysis, or both.                                                                                                                                                                                                                                        | 1           |
| <b>Abstract</b>     |                                                                                                                                                                                                                                                                                                                               |             |
| Structured summary  | <a href="#">#2</a> Provide a structured summary including, as applicable: background; objectives; data sources; study eligibility criteria, participants, and interventions; study appraisal and synthesis methods; results; limitations; conclusions and implications of key findings; systematic review registration number | 2           |
| <b>Introduction</b> |                                                                                                                                                                                                                                                                                                                               |             |
| Rationale           | <a href="#">#3</a> Describe the rationale for the review in the context of what is already known.                                                                                                                                                                                                                             | 4           |
| Objectives          | <a href="#">#4</a> Provide an explicit statement of questions being addressed with reference to participants, interventions, comparisons, outcomes, and study design (PICOS).                                                                                                                                                 | 5           |

## 1 **Methods**

|    |                 |                     |                                                                                 |
|----|-----------------|---------------------|---------------------------------------------------------------------------------|
| 2  |                 |                     |                                                                                 |
| 3  | Protocol and    | <a href="#">#5</a>  | Indicate if a review protocol exists, if and where it can be                    |
| 4  | registration    |                     | accessed (e.g., Web address) and, if available, provide                         |
| 5  |                 |                     | registration information including the registration number.                     |
| 6  |                 |                     |                                                                                 |
| 7  |                 |                     |                                                                                 |
| 8  | Eligibility     | <a href="#">#6</a>  | Specify study characteristics (e.g., PICOS, length of follow-up)                |
| 9  | criteria        |                     | and report characteristics (e.g., years considered, language,                   |
| 10 |                 |                     | publication status) used as criteria for eligibility, giving rational           |
| 11 |                 |                     |                                                                                 |
| 12 |                 |                     |                                                                                 |
| 13 | Information     | <a href="#">#7</a>  | Describe all information sources in the search (e.g., databases                 |
| 14 | sources         |                     | with dates of coverage, contact with study authors to identify                  |
| 15 |                 |                     | additional studies) and date last searched.                                     |
| 16 |                 |                     |                                                                                 |
| 17 |                 |                     |                                                                                 |
| 18 | Search          | <a href="#">#8</a>  | Present full electronic search strategy for at least one database,              |
| 19 |                 |                     | including any limits used, such that it could be repeated.                      |
| 20 |                 |                     |                                                                                 |
| 21 |                 |                     |                                                                                 |
| 22 |                 |                     |                                                                                 |
| 23 | Study selection | <a href="#">#9</a>  | State the process for selecting studies (i.e., for screening, for               |
| 24 |                 |                     | determining eligibility, for inclusion in the systematic review,                |
| 25 |                 |                     | and, if applicable, for inclusion in the meta-analysis).                        |
| 26 |                 |                     |                                                                                 |
| 27 |                 |                     |                                                                                 |
| 28 | Data collection | <a href="#">#10</a> | Describe the method of data extraction from reports (e.g., piloted              |
| 29 | process         |                     | forms, independently by two reviewers) and any processes for                    |
| 30 |                 |                     | obtaining and confirming data from investigators.                               |
| 31 |                 |                     |                                                                                 |
| 32 |                 |                     |                                                                                 |
| 33 | Data items      | <a href="#">#11</a> | List and define all variables for which data were sought (e.g.,                 |
| 34 |                 |                     | PICOS, funding sources), and any assumptions and                                |
| 35 |                 |                     | simplifications made.                                                           |
| 36 |                 |                     |                                                                                 |
| 37 |                 |                     |                                                                                 |
| 38 |                 |                     |                                                                                 |
| 39 | Risk of bias in | <a href="#">#12</a> | Describe methods used for assessing risk of bias in individual                  |
| 40 | individual      |                     | studies (including specification of whether this was done at the                |
| 41 | studies         |                     | study or outcome level, or both), and how this information is to                |
| 42 |                 |                     | be used in any data synthesis.                                                  |
| 43 |                 |                     |                                                                                 |
| 44 |                 |                     |                                                                                 |
| 45 | Summary         | <a href="#">#13</a> | State the principal summary measures (e.g., risk ratio, difference              |
| 46 | measures        |                     | in means).                                                                      |
| 47 |                 |                     |                                                                                 |
| 48 |                 |                     |                                                                                 |
| 49 | Planned methods | <a href="#">#14</a> | Describe the methods of handling data and combining results of                  |
| 50 | of analysis     |                     | studies, if done, including measures of consistency (e.g., I <sup>2</sup> ) for |
| 51 |                 |                     | each meta-analysis.                                                             |
| 52 |                 |                     |                                                                                 |
| 53 |                 |                     |                                                                                 |
| 54 |                 |                     |                                                                                 |
| 55 | Risk of bias    | <a href="#">#15</a> | Specify any assessment of risk of bias that may affect the                      |
| 56 | across studies  |                     | cumulative evidence (e.g., publication bias, selective reporting                |
| 57 |                 |                     | within studies).                                                                |
| 58 |                 |                     |                                                                                 |
| 59 |                 |                     |                                                                                 |
| 60 |                 |                     |                                                                                 |



|    |                   |                     |                                                                      |               |
|----|-------------------|---------------------|----------------------------------------------------------------------|---------------|
| 1  | Additional        | <a href="#">#16</a> | Describe methods of additional analyses (e.g., sensitivity or        | N/A           |
| 2  | analyses          |                     | subgroup analyses, meta-regression), if done, indicating which       |               |
| 3  |                   |                     | were pre-specified.                                                  |               |
| 4  |                   |                     |                                                                      |               |
| 5  |                   |                     |                                                                      |               |
| 6  | <b>Results</b>    |                     |                                                                      |               |
| 7  |                   |                     |                                                                      |               |
| 8  | Study selection   | <a href="#">#17</a> | Give numbers of studies screened, assessed for eligibility, and      | 7-8, Figure 1 |
| 9  |                   |                     | included in the review, with reasons for exclusions at each stage,   |               |
| 10 |                   |                     | ideally with a <a href="#">flow diagram</a> .                        |               |
| 11 |                   |                     |                                                                      |               |
| 12 |                   |                     |                                                                      |               |
| 13 |                   |                     |                                                                      |               |
| 14 | Study             | <a href="#">#18</a> | For each study, present characteristics for which data were          | Supplementary |
| 15 | characteristics   |                     | extracted (e.g., study size, PICOS, follow-up period) and provide    | Table 1       |
| 16 |                   |                     | the citation.                                                        |               |
| 17 |                   |                     |                                                                      |               |
| 18 |                   |                     |                                                                      |               |
| 19 | Risk of bias      | <a href="#">#19</a> | Present data on risk of bias of each study and, if available, any    | Supplementary |
| 20 | within studies    |                     | outcome-level assessment (see Item 12).                              | Table 1       |
| 21 |                   |                     |                                                                      |               |
| 22 |                   |                     |                                                                      |               |
| 23 | Results of        | <a href="#">#20</a> | For all outcomes considered (benefits and harms), present, for       | Supplementary |
| 24 | individual        |                     | each study: (a) simple summary data for each intervention group      | Table 1       |
| 25 | studies           |                     | and (b) effect estimates and confidence intervals, ideally with a    |               |
| 26 |                   |                     | forest plot.                                                         |               |
| 27 |                   |                     |                                                                      |               |
| 28 |                   |                     |                                                                      |               |
| 29 |                   |                     |                                                                      |               |
| 30 | Synthesis of      | <a href="#">#21</a> | Present the main results of the review. If meta-analyses are done,   | 9-12          |
| 31 | results           |                     | include for each, confidence intervals and measures of               |               |
| 32 |                   |                     | consistency.                                                         |               |
| 33 |                   |                     |                                                                      |               |
| 34 |                   |                     |                                                                      |               |
| 35 | Risk of bias      | <a href="#">#22</a> | Present results of any assessment of risk of bias across studies     | N/A           |
| 36 | across studies    |                     | (see Item 15).                                                       |               |
| 37 |                   |                     |                                                                      |               |
| 38 |                   |                     |                                                                      |               |
| 39 | Additional        | <a href="#">#23</a> | Give results of additional analyses, if done (e.g., sensitivity or   | N/A           |
| 40 | analysis          |                     | subgroup analyses, meta-regression [see Item 16]).                   |               |
| 41 |                   |                     |                                                                      |               |
| 42 |                   |                     |                                                                      |               |
| 43 | <b>Discussion</b> |                     |                                                                      |               |
| 44 |                   |                     |                                                                      |               |
| 45 | Summary of        | <a href="#">#24</a> | Summarize the main findings, including the strength of evidence      | 12-14         |
| 46 | Evidence          |                     | for each main outcome; consider their relevance to key groups        |               |
| 47 |                   |                     | (e.g., health care providers, users, and policy makers               |               |
| 48 |                   |                     |                                                                      |               |
| 49 |                   |                     |                                                                      |               |
| 50 | Limitations       | <a href="#">#25</a> | Discuss limitations at study and outcome level (e.g., risk of bias), | 14-15         |
| 51 |                   |                     | and at review level (e.g., incomplete retrieval of identified        |               |
| 52 |                   |                     | research, reporting bias).                                           |               |
| 53 |                   |                     |                                                                      |               |
| 54 |                   |                     |                                                                      |               |
| 55 |                   |                     |                                                                      |               |
| 56 | Conclusions       | <a href="#">#26</a> | Provide a general interpretation of the results in the context of    | 15            |
| 57 |                   |                     | other evidence, and implications for future research.                |               |
| 58 |                   |                     |                                                                      |               |
| 59 |                   |                     |                                                                      |               |
| 60 |                   |                     |                                                                      |               |



## Funding

Funding [#27](#) Describe sources of funding or other support (e.g., supply of data) for the systematic review; role of funders for the systematic review. 16

### Notes:

- 17: 7-8, Figure 1
- 18: Supplementary Table 1
- 19: Supplementary Table 1
- 20: Supplementary Table 1 The PRISMA checklist is distributed under the terms of the Creative Commons Attribution License CC-BY. This checklist was completed on 19. October 2019 using <https://www.goodreports.org/>, a tool made by the [EQUATOR Network](#) in collaboration with [Penelope.ai](#)

# BMJ Open

## Impact evaluations of drug decriminalization and legal regulation on drug use, health and social harms: A systematic review

|                                 |                                                                                                                                                                                                                                                                                                                                                                                                                                                                                                                                                                                 |
|---------------------------------|---------------------------------------------------------------------------------------------------------------------------------------------------------------------------------------------------------------------------------------------------------------------------------------------------------------------------------------------------------------------------------------------------------------------------------------------------------------------------------------------------------------------------------------------------------------------------------|
| Journal:                        | <i>BMJ Open</i>                                                                                                                                                                                                                                                                                                                                                                                                                                                                                                                                                                 |
| Manuscript ID                   | bmjopen-2019-035148.R2                                                                                                                                                                                                                                                                                                                                                                                                                                                                                                                                                          |
| Article Type:                   | Original research                                                                                                                                                                                                                                                                                                                                                                                                                                                                                                                                                               |
| Date Submitted by the Author:   | 30-Jun-2020                                                                                                                                                                                                                                                                                                                                                                                                                                                                                                                                                                     |
| Complete List of Authors:       | Scheim, Ayden; Drexel University, Epidemiology and Biostatistics; St Michael's Hospital, Centre on Drug Policy Evaluation<br>Maghsoudi, Nazlee; St Michael's Hospital, Centre on Drug Policy Evaluation; University of Toronto, Institute of Health Policy, Management and Evaluation<br>Marshall, Zack; McGill University, Social Work<br>Churchill, Siobhan; Western University, Epidemiology and Biostatistics<br>Ziegler, Carolyn; Unity Health Toronto<br>Werb, Dan; University of California San Diego, Medicine; St Michael's Hospital, Centre on Drug Policy Evaluation |
| <b>Primary Subject Heading</b>: | Public health                                                                                                                                                                                                                                                                                                                                                                                                                                                                                                                                                                   |
| Secondary Subject Heading:      | Addiction, Epidemiology, Health policy                                                                                                                                                                                                                                                                                                                                                                                                                                                                                                                                          |
| Keywords:                       | Substance misuse < PSYCHIATRY, PUBLIC HEALTH, LAW (see Medical Law)                                                                                                                                                                                                                                                                                                                                                                                                                                                                                                             |
|                                 |                                                                                                                                                                                                                                                                                                                                                                                                                                                                                                                                                                                 |

SCHOLARONE™  
Manuscripts



I, the Submitting Author has the right to grant and does grant on behalf of all authors of the Work (as defined in the below author licence), an exclusive licence and/or a non-exclusive licence for contributions from authors who are: i) UK Crown employees; ii) where BMJ has agreed a CC-BY licence shall apply, and/or iii) in accordance with the terms applicable for US Federal Government officers or employees acting as part of their official duties; on a worldwide, perpetual, irrevocable, royalty-free basis to BMJ Publishing Group Ltd ("BMJ") its licensees and where the relevant Journal is co-owned by BMJ to the co-owners of the Journal, to publish the Work in this journal and any other BMJ products and to exploit all rights, as set out in our [licence](#).

The Submitting Author accepts and understands that any supply made under these terms is made by BMJ to the Submitting Author unless you are acting as an employee on behalf of your employer or a postgraduate student of an affiliated institution which is paying any applicable article publishing charge ("APC") for Open Access articles. Where the Submitting Author wishes to make the Work available on an Open Access basis (and intends to pay the relevant APC), the terms of reuse of such Open Access shall be governed by a Creative Commons licence – details of these licences and which [Creative Commons](#) licence will apply to this Work are set out in our licence referred to above.

Other than as permitted in any relevant BMJ Author's Self Archiving Policies, I confirm this Work has not been accepted for publication elsewhere, is not being considered for publication elsewhere and does not duplicate material already published. I confirm all authors consent to publication of this Work and authorise the granting of this licence.

1  
2  
3 **Impact evaluations of drug decriminalization and legal regulation on drug use, health and**  
4 **social harms: A systematic review**  
5

6 Ayden I. Scheim,<sup>1,2,3</sup> Nazlee Maghsoudi,<sup>1,4</sup> Zack Marshall,<sup>5</sup> Siobhan Churchill,<sup>6</sup> Carolyn Ziegler,<sup>7</sup>  
7 Dan Werb<sup>1,2,4</sup>  
8  
9

10 1. Centre on Drug Policy Evaluation, Li Ka Shing Knowledge Institute, St. Michael's Hospital,  
11 Toronto, ON, Canada  
12

13 2. Department of Medicine, University of California San Diego, La Jolla, CA  
14

15 3. Department of Epidemiology, Dornsife School of Public Health, Philadelphia, PA  
16

17 4. Institute of Health Policy, Management and Evaluation, University of Toronto, Toronto, ON,  
18 Canada  
19

20 5. Department of Social Work, McGill University, Montreal, QC, Canada  
21

22 6. Department of Epidemiology and Biostatistics, Western University, London, ON, Canada  
23

24 7. Health Sciences Library, St. Michael's Hospital, Toronto, ON, Canada  
25

26 **Corresponding Author:**  
27

28 Dan Werb  
29 St. Michael's Hospital  
30 30 Bond Street  
31 Toronto, ON, Canada  
32 M5B 1X1  
33  
34  
35  
36

37 Email: [dwerb@ucsd.edu](mailto:dwerb@ucsd.edu)  
38

39 Phone: 858-205-8262  
40  
41  
42

43 **Word Count:** 4616  
44  
45  
46  
47  
48  
49  
50  
51  
52  
53  
54  
55  
56  
57  
58  
59  
60

## ABSTRACT

**Objectives:** To review the metrics and findings of studies evaluating effects of drug decriminalization or legal regulation on drug availability, use, or related health and social harms globally.

**Design:** Systematic review with narrative synthesis.

**Data sources:** We searched MEDLINE, Embase, PsycINFO, Web of Science, and six additional databases for publications from 1 January 1970 through 4 October 2018.

**Inclusion criteria:** Peer-reviewed articles or published abstracts in any language with quantitative data on drug availability, use, or related health and social harms collected before and after implementation of *de jure* drug decriminalization or legal regulation.

**Data extraction and synthesis:** Two independent reviewers screened titles, abstracts, and articles for inclusion. Extraction and quality appraisal (modified Downs and Black checklist) were performed by one reviewer and checked by a second, with discrepancies resolved by a third. We coded study-level outcome measures into metric groupings and categorized the estimated direction of association between the legal change and outcomes of interest.

**Results:** We screened 4860 titles and 221 full texts and included 114 articles. Most (n=104, 91.2%) were from the U.S., evaluated cannabis reform (n=109, 95.6%), and focused on legal regulation (n=96, 84.2%). 224 study outcome measures were categorized into 32 metrics, most commonly prevalence (39.5% of studies), frequency (14.0%), or perceived harmfulness (10.5%) of use of the decriminalized or regulated drug; or use of tobacco, alcohol, or other drugs (12.3%). Across all substance use metrics, legal reform was most often not associated with changes in use.

**Conclusions:** Studies evaluating drug decriminalization and legal regulation are concentrated in the U.S. and on cannabis legalization. Despite the range of outcomes potentially impacted by drug law reform, extant research is narrowly focused, with a particular emphasis on the prevalence of use. Metrics in drug law reform evaluations require improved alignment with relevant health and social outcomes.

### Strengths and limitations of this study

- This is the first study to review all literature on the health and social impacts of decriminalization or legal regulation of drugs.
- We systematically searched 10 databases over a 38-year period, without language restrictions.
- The review was limited to study designs appropriate for evaluating interventions, nevertheless, most included studies used relatively weak evaluation designs.
- Included outcomes were heterogeneous and not quantitatively synthesized.
- Heterogeneity in the details and implementation of decriminalization or legal regulation policies was not considered in this review.

## INTRODUCTION

An estimated 271 million people used an internationally scheduled (“illicit”) drug in 2017, corresponding to 5.5% of the global population aged 15-64.[1] Despite decades of investment, policies aimed at reducing supply and demand have demonstrated limited effectiveness.[2,3] Moreover, prohibitive and punitive drug policies have had counterproductive effects by contributing to HIV and hepatitis C transmission,[4,5] fatal overdose,[6] mass incarceration and other human rights violations,[7,8] and drug market violence.[9] As a result, there have been growing calls for drug law reform [10–12] and in 2019, the United Nations Chief Executives Board endorsed decriminalization of drug use and possession.[13] Against this backdrop, as of 2017 approximately 23 countries had implemented *de jure* decriminalization or legal regulation of one or more previously illegal drugs.[14–16]

A wide range of health and social outcomes are affected by psychoactive drug production, sales, and use, and thus are potentially impacted by drug law reform. Nutt and colleagues have categorized these as physical harms (e.g., drug-related morbidity and mortality to users, injury to non-users), psychological harms (e.g., dependence), and social harms (e.g., loss of tangibles, environmental damage).[17,18] 2Concomitantly, a diverse and sometimes competing set of goals motivate drug policy development, including ameliorating the poor health and social marginalization experienced by people who use drugs problematically, shifting patterns of use to less harmful products or modes of administration, curtailing illegal markets and drug-related crime, and reducing the economic burden of drug-related harms.[19]

Given ongoing interest by states in drug law reform, as well as the recent position statement by the UN Chief Executives Board endorsing drug decriminalization,[13] a comprehensive understanding of their impacts to date is required. However, the scientific literature has not been well-characterized, and thus the state of the evidence related to these heterogenous policy targets remains largely unclear. Systematic reviews, including two meta-analyses, are narrowly focused on adolescent cannabis use. Dirisu et al. found no conclusive evidence that cannabis legalization for medical or recreational purposes increases cannabis use by young people.[20] In the two meta-analyses, Sarvet et al. found that the implementation of medical cannabis policies in the



1  
2  
3 United States (U.S.) did not lead to increases in the prevalence of past-month cannabis use  
4 among adolescents [21] and Melchior et al. found a small increase in use following recreational  
5 legalization that was reported only among lower-quality studies.[22]  
6  
7  
8  
9

10 Given increasing interest in quantifying the impact of drug law reform, as well as a lack of  
11 systematic assessment of outcomes beyond adolescent cannabis use to date, we conducted a  
12 systematic review of original peer-reviewed research evaluating the impacts of (a) legal  
13 regulation and (b) drug decriminalization on drug availability, use, or related health and social  
14 harms. Our primary aim is to characterize studies with respect to metrics and indicators used.  
15 The secondary aim is to summarize the findings and methodologic quality of studies to date.  
16  
17  
18  
19  
20

## 21 **METHODS**

22  
23  
24 Consistent with our aim of synthesizing evidence on the impacts of decriminalization and  
25 legal regulation across the spectrum of potential health and social effects, we conducted a  
26 systematic review using narrative synthesis [23] without meta-analysis. Preferred Reporting  
27 Items for Systematic Reviews and Meta-Analyses (PRISMA) guidelines were followed in  
28 preparing this manuscript.[24] The review protocol was registered in PROSPERO  
29 (CRD42017079681) and can be found online at  
30  
31 [https://www.crd.york.ac.uk/prospero/display\\_record.php?RecordID=79681](https://www.crd.york.ac.uk/prospero/display_record.php?RecordID=79681).  
32  
33  
34  
35  
36  
37

### 38 **Search Strategy and Selection Criteria**

39 The review team developed, piloted, and refined the search strategy in consultation with a  
40 research librarian and content experts. We searched MEDLINE, Embase, PsycINFO, Web of  
41 Science, Criminal Justice Abstracts, Applied Social Sciences Index & Abstracts, International  
42 Bibliography of the Social Sciences, PAIS Index, Policy File Index, and Sociological Abstracts  
43 for publications from 1 January 1970 through 4 October 2018. We used MeSH terms and  
44 keywords related to (a) scheduled psychoactive drugs (b) legal regulation or decriminalization  
45 policies, and (c) quantitative study designs. Search terms specific to health and social outcomes  
46 were not employed so that the search would capture the broad range of outcomes of interest. See  
47 Appendix A for the final MEDLINE search strategy. For conference abstracts, we contacted  
48  
49  
50  
51  
52  
53  
54  
55  
56  
57  
58  
59  
60

1  
2  
3 authors for additional information on study methods and to identify subsequent relevant  
4 publications.  
5  
6  
7

8 We included peer-reviewed journal articles or conference abstracts reporting on original  
9 quantitative studies that collected data both before and after the implementation of drug  
10 decriminalization or legal regulation. We did not consider as original research studies that  
11 reproduced secondary data without conducting original statistical analyses of the data. We  
12 defined decriminalization as the removal of criminal penalties for drug use and/or possession  
13 (allowing for civil or administrative sanctions) and legal regulation as the development of a legal  
14 regulatory framework for the use, production, and sale of formerly illegal psychoactive drugs.  
15 Studies were excluded if they evaluated *de facto* (e.g., changes in enforcement practices) rather  
16 than *de jure* decriminalization or legal regulation (changes to the law). This exclusion applied to  
17 studies analyzing changes in outcomes following the U.S. Justice Department 2009 memo  
18 deprioritizing prosecution of cannabis-related offences legal under state medical cannabis laws.  
19 Eligible studies included outcome measures pertaining to drug availability, use, or related health  
20 and social harms. We used the schema developed by Nutt and colleagues to conceptualize health  
21 and social harms, including those to users (physical, psychological, and social) and to others  
22 (injury or social harm).[18]  
23  
24  
25  
26  
27  
28  
29  
30  
31  
32  
33  
34

35 Both observational studies and randomized controlled trials were eligible in principle, but no  
36 trials were identified. There were no geographic or language restrictions; titles, abstracts, and  
37 full-texts were translated on an as-needed basis for screening and data extraction. We excluded  
38 cross-sectional studies (unless they were repeated) and studies lacking pre- and post-  
39 implementation data collection because such designs are inappropriate for evaluating  
40 intervention effects.  
41  
42  
43  
44  
45

#### 46 **Data Analysis**

47 Screening and data extraction were conducted in DistillerSR (Evidence Partners, Ottawa,  
48 Ontario). We began with title-only screening to identify potentially relevant titles. Two reviewers  
49 screened each title. Unless both reviewers independently decided a title should be excluded, it  
50 was advanced to the next stage. Next, two reviewers independently screened each potentially  
51 eligible abstract. Inter-rater reliability was good (weighted Kappa at the question level=0.75). At  
52  
53  
54  
55  
56  
57  
58  
59  
60

1  
2  
3 this stage, we retrieved full-text copies of all remaining references, which were screened  
4 independently by two reviewers. Disagreements on inclusion were resolved through discussion  
5 with the first author. Finally, one reviewer extracted data from each included publication using a  
6 standardized, pre-piloted form and performed quality appraisal. A second reviewer double-  
7 checked data extraction and quality appraisal for every publication, and the first author resolved  
8 any discrepancies.  
9  
10  
11  
12  
13  
14

15 The data extraction form included information on study characteristics (author, title, year,  
16 geographic location), type of legal change studied and drug(s) impacted, details and timing of the  
17 legal change (e.g., medical vs. recreational cannabis regulation), study design, sampling  
18 approach, sample characteristics (size, age range, proportion female), and quantitative estimates  
19 of association. We coded each study-level outcome measure into one metric grouping, using 24  
20 pre-specified categories and a free-text field (see Figure 1 for full list). Examples of metrics  
21 include: prevalence of use of the decriminalized or regulated drug, overdose or poisoning, and  
22 non-drug crime.  
23  
24  
25  
26  
27  
28  
29

30 We also categorized the estimated direction of association of the legal change on outcome  
31 measure(s) of interest (beneficial, harmful, mixed, or null).<sup>2</sup> These associations were coded at  
32 the outcome (not study) level and classified as beneficial if a statistically significant increase in a  
33 positive outcome (e.g., educational attainment) or decrease in a negative outcome (e.g.,  
34 substance use disorder) was attributed to implementation of decriminalization or legal regulation,  
35 and vice-versa for harmful associations. The association was categorized as mixed if associations  
36 were both harmful and beneficial across participant subgroups, exposure definitions (e.g., loosely  
37 vs. tightly regulated medical cannabis access), or timeframes. Although any use of cannabis and  
38 other psychoactive drugs need not be problematic at the individual level, we categorized drug  
39 use as a negative outcome given that population-level increases in use may correspond to  
40 increases in negative consequences; we thought that this cautious approach to categorization was  
41 appropriate given that such increases are generally conceptualized as negative within the  
42 scientific literature. For outcomes that are not unambiguously negative or positive, the coding  
43 approach was pre-determined taking a societal perspective. For example, increased healthcare  
44 utilization (e.g., hospital visits due to cannabis use) was coded as negative because of the  
45 increased burden placed on healthcare systems. The association was categorized as null if no  
46  
47  
48  
49  
50  
51  
52  
53  
54  
55  
56  
57  
58  
59  
60

1  
2  
3 statistically significant changes following implementation of drug decriminalization or legal  
4 regulation were detected. We set statistical significance at  $\alpha=0.05$ , including in cases where  
5 authors used more liberal criteria.  
6  
7

8  
9 Quality assessment at the study level was conducted for each full-length article using a modified  
10 version of the Downs and Black checklist [25] for observational studies (see Appendix B), which  
11 assesses internal validity (bias), external validity, and reporting. Each study could receive up to  
12 18 points, with higher scores indicating more methodologically rigorous studies. Conference  
13 abstracts were not subjected to quality assessment due to limited methodologic details.  
14  
15  
16  
17

### 18 **Patient and Public Involvement**

19 This systematic review of existing studies did not include patient or public involvement.  
20  
21  
22

## 23 **RESULTS**

### 24 **Study Characteristics**

25  
26 As shown in the PRISMA Flow Diagram (Figure 2), we screened 4860 titles and abstracts and  
27 213 full texts, with 114 articles meeting inclusion criteria (Appendix C). Key reasons for  
28 exclusion at the full-text screening stage were that the article did not report on original  
29 quantitative research ( $n=59$ ) or did not evaluate decriminalization or legal regulation as defined  
30 herein ( $n=23$ ). Details of each included study are presented in Supplementary Table 1. Included  
31 studies had final publication dates from 1976-2019; 44.7% ( $n=51$ ) were first published in 2017-  
32 2018, 43.9% ( $n=50$ ) were published in 2014-2016 and 11.4% ( $n=13$ ) were published before  
33 2014.  
34  
35  
36  
37  
38  
39  
40  
41  
42

43 Characteristics of included studies are described in Table 1, both overall and stratified by  
44 whether they evaluated decriminalization ( $n=19$ ) or legalization ( $n=96$ ) policies (one study  
45 evaluated both policies). Most studies ( $n=104$ , 91.2%) were from the U.S. and examined impacts  
46 of liberalizing cannabis laws ( $n=109$ , 95.6%). Countries represented in non-U.S. studies included  
47 Australia, Belgium, China, Czech Republic, Mexico, and Portugal. The most common study  
48 designs were repeated cross-sectional ( $n=74$ , 64.9%) or controlled before-and-after ( $n=26$ ,  
49 22.8%) studies and the majority of studies ( $n=87$ , 76.3%) used population-based sampling  
50  
51  
52  
53  
54  
55  
56  
57  
58  
59  
60

**Table 1. Characteristics of studies evaluating drug decriminalization or legal regulation, 1970-2018**

| <b>Characteristic</b>           | <b>Total (%)<br/>n (%)<br/>(n = 114)</b> | <b>Decriminalization<sup>a</sup><br/>n (%)<br/>(n =19)</b> | <b>Legal regulation<sup>a</sup><br/>n (%)<br/>(n =96)</b> |
|---------------------------------|------------------------------------------|------------------------------------------------------------|-----------------------------------------------------------|
| <b>Country</b>                  |                                          |                                                            |                                                           |
| United States                   | 104 (91.2)                               | 10 (52.6)                                                  | 95 (99.0)                                                 |
| Australia                       | 3 (2.6)                                  | 3 (15.8)                                                   | 0 (0.0)                                                   |
| Portugal                        | 2 (1.8)                                  | 2 (10.5)                                                   | 0 (0.0)                                                   |
| China                           | 1 (0.9)                                  | 0 (0.0)                                                    | 1 (1.0)                                                   |
| Czech Republic                  | 1 (0.9)                                  | 1 (5.3)                                                    | 0 (0.0)                                                   |
| Mexico                          | 1 (0.9)                                  | 1 (5.3)                                                    | 0 (0.0)                                                   |
| Multi-country <sup>b</sup>      | 2 (1.8)                                  | 2 (10.5)                                                   | 0 (0.0)                                                   |
| <b>Focus of drug law reform</b> |                                          |                                                            |                                                           |
| Cannabis                        | 109 (95.6)                               | 15 (78.9)                                                  | 95 (99.0)                                                 |
| Opium                           | 1 (0.9)                                  | 0 (0.0)                                                    | 1 (1.0)                                                   |
| Peyote                          | 1 (0.9)                                  | 1 (5.3)                                                    | 0 (0.0)                                                   |
| Multiple/All drugs              | 3 (2.6)                                  | 3 (15.8)                                                   | 0 (0.0)                                                   |
| <b>Study design</b>             |                                          |                                                            |                                                           |
| Cohort                          | 4 (3.5)                                  | 0 (0.0)                                                    | 4 (4.2)                                                   |
| Controlled before-and-after     | 26 (22.8)                                | 6 (31.6)                                                   | 20 (20.8)                                                 |
| Interrupted time series         | 6 (5.3)                                  | 0 (0.0)                                                    | 6 (6.3)                                                   |
| Repeated cross-sectional        | 74 (64.9)                                | 11 (57.9)                                                  | 64 (66.7)                                                 |
| Uncontrolled before-and-after   | 4 (3.5)                                  | 2 (10.5)                                                   | 2 (2.1)                                                   |
| <b>Sampling approach</b>        |                                          |                                                            |                                                           |
| Convenience                     | 22 (19.3)                                | 5 (26.3)                                                   | 18 (18.8)                                                 |
| Population-based                | 87 (76.3)                                | 13 (68.4)                                                  | 74 (77.1)                                                 |
| Administrative records          | 45 (39.5)                                | 6 (31.6)                                                   | 39 (40.6)                                                 |
| Household survey                | 25 (21.9)                                | 5 (26.3)                                                   | 20 (20.8)                                                 |
| School-based survey             | 17 (14.9)                                | 2 (10.5)                                                   | 15 (15.6)                                                 |
| Unspecified                     | 5 (4.2)                                  | 1 (5.3)                                                    | 4 (4.2)                                                   |

a. Combined total exceeds number of studies because some evaluated both decriminalization and legal regulation.

b. One global study and one multi-country European study including Belgium and Portugal.

methods. Figure 3 illustrates the geographic distribution of studies among countries where national or subnational governments had decriminalized or legally regulated one or more drugs.

### Study Quality

Quality assessment was performed for the 93 full-length articles included in the review, excluding 21 conference abstracts (Supplementary Table 1). Scores ranged from 7 to 18 of 18

possible points, with a mean of 14.4 (SD=2.56). Quality scores were similar comparing U.S. to non-U.S.-based studies ( $X=14.4$  and  $13.7$ , respectively,  $p=0.386$ ) but higher for studies evaluating legal regulation ( $X=14.8$ ) versus decriminalization ( $X=12.8$ ) ( $p=0.003$ ). Study quality differed significantly ( $p<0.001$ ) by the direction of the association with the outcome of interest, with higher quality scores among studies estimating mixed ( $X=15.4$ ) or beneficial ( $X=15.2$ ) versus null ( $X=14.2$ ) or harmful ( $X=13.1$ ) effects of legal change on the outcome of interest. Study quality did not appear to increase over time (e.g.,  $X=14.0$  in 2014 and  $14.4$  in 2018).

### Study Outcome Measures and Metrics

Across 114 studies we extracted 224 outcome measures, which were coded into 32 metrics (Figure 1). The most common metric employed by studies was the prevalence of use of the decriminalized or legally regulated drug, which was examined in 39.5% of studies ( $n=45$ ) and represented 22.3% of outcome measures ( $n=50$ ). Of these studies, 13 (28.9%; 8 full-length articles and 5 abstracts) did not report any other metric [26–38] and an additional 6 studies (13.3%) reported on the prevalence of use in addition to a single drug-related perception metric (either harmfulness or availability).[39–44] The second most common metric was the frequency of use of the decriminalized or legally regulated drug (14.0% of studies,  $n=16$ ) and the third was the prevalence or frequency of use of tobacco, alcohol, or drugs that remained illegal (12.3% of studies,  $n=14$ ; 9.4% of outcome measures,  $n=21$ ). The fourth most commonly employed metric was any change in the perceived health harmfulness of using the decriminalized or regulated drug (10.5% of studies,  $n=12$ ), which was assessed among adolescents or young adults in all studies except for one that assessed this metric among parents.[45]

All other metrics were assessed in <10% of included studies. Health service utilization was evaluated in 7.9% of studies ( $n=9$ ) using 12 outcome measures, primarily related to emergency department visits and/or hospitalizations. Prescribed (primarily opioid) drug use and perceived availability of the decriminalized or legally regulated drug were reported in 7.0% of studies each ( $n=8$ ). Overdose or poisoning by the decriminalized or regulated drug, and by other drugs (predominantly opioids), were examined in 5.3% ( $n=6$ ) and 6.1% of studies ( $n=7$ ), respectively. Driving while under the influence or with detectable concentrations of the decriminalized or regulated drug (cannabis) was examined in seven studies (6.1%) inclusive of eight outcome

1  
2  
3 measures. Notably, one study assessed self-reported impaired driving,[46] while others assessed  
4 the proportion of fatally injured drivers screening cannabis-positive or the overall prevalence of  
5 driving with detectable THC concentrations in blood. Remaining metrics were measured in less  
6 than 5% of studies (Figure 1). Some pre-specified metrics were not represented in any of the  
7 articles, including infectious disease incidence (e.g., HIV, Hepatitis C), environmental impacts  
8 (e.g., drug production waste, discarded needles), and labor market participation.  
9

### 15 *Studies Outside the U.S.*

16 Of the ten studies conducted outside the U.S., six focused on cannabis decriminalization. All  
17 three studies from Australia examined the prevalence of cannabis use post-  
18 decriminalization,[31,34,47] while one also measured perceived cannabis availability.[47]  
19 Following cannabis decriminalization, one European multi-country study including Belgium and  
20 Portugal examined the prevalence of cannabis use and uptake of cannabis-related addictions  
21 treatment [48] and one Czech study considered the age of first cannabis use.[49] An international  
22 study using United Nations Office on Drugs and Crime data from 102 countries compared  
23 availability, as reflected by cannabis seizures and plant eradication, in countries that had  
24 decriminalized cannabis versus those that had not.[50] Three non-U.S. studies evaluated  
25 decriminalization of all psychoactive drugs. Two studies from Portugal examined health care and  
26 non-health-care costs and psychoactive drug prices, respectively.[51,52] One study from Mexico  
27 examined drug-related criminal justice involvement (arrests) and (violent) crimes.[53] Finally, a  
28 study of historic opium legalization in China (1801-1902) measured the price and availability  
29 (quantity of exports) of opium before and after legalization.[54]  
30  
31  
32  
33  
34  
35  
36  
37  
38  
39  
40  
41  
42

### 43 **Impacts of Decriminalization and Legal Regulation**

44 Results of individual studies are provided in Supplementary Table 1. Supplementary Table 2  
45 tallies findings and average quality scores for each of the metrics; here we summarize findings  
46 for metrics examined in more than 5% of studies, in descending order based on the number of  
47 datapoints. Across all three substance use metrics (prevalence of use, frequency of use, and use  
48 of other alcohol or drugs), drug law reform was most often not associated with use (with null  
49 findings for 48.0-52.4% of outcome measures falling under these metrics). With respect to  
50 change in perceived harmfulness of the decriminalized or regulated drug, mixed results were  
51  
52  
53  
54  
55  
56  
57  
58  
59  
60



1  
2  
3 found in half of cases, with heterogeneity detected on the basis of age, gender, and  
4 state.[39,43,55–57] For example, legal regulation of cannabis for medical use was associated  
5 with greater perceived harmfulness of cannabis among eighth graders but not older students in an  
6 analysis of U.S. Monitoring the Future data [39] while a study employing U.S. National Survey  
7 on Drug Use and Health data found greater perceived harmfulness of cannabis among young  
8 adults aged 18-25 but not adolescents aged 12-17.[57]  
9  
10  
11  
12  
13  
14

15 Among nine studies that employed health service utilization metrics, harmful effects were  
16 reported for six of twelve outcome measures, with increases in emergency department visits  
17 and/or hospitalizations attributed to decriminalization or legal regulation.[58–63] However, all  
18 but one of those studies [58] assessed change over time in one jurisdiction, without a control  
19 group. Further, two studies that also examined changes in acute care use for non-cannabis drugs  
20 found reductions in those visits or admissions following cannabis decriminalization or legal  
21 regulation [60, 64]. In contrast, six of nine prescription drug use associations were beneficial,  
22 with reductions observed in rates of opioid [65–69] and other drug prescribing [70,71] attributed  
23 to legal regulation of cannabis for medical use; outcomes in this category came from studies of  
24 higher average quality ( $X=16.3$ ). Perceived availability of the decriminalized or regulated drug  
25 appeared largely unaffected by decriminalization (null associations for five of nine outcome  
26 measures) but two studies indicated increased perceived availability of cannabis among  
27 Colorado, U.S. adolescents following legal regulation for adult use [72] and among adults in  
28 U.S. states with legal regulation for medical use.[44] Across the subset of seven outcome  
29 measures for overdose or poisoning by the decriminalized or regulated drug (cannabis), in all  
30 cases an increase in calls to poison control centers or unintentional pediatric exposures was  
31 reported.[59,73–77] However, studies assessing the impacts of cannabis regulation on overdose  
32 or poisoning by drugs other than cannabis concluded that the effects were either beneficial (four  
33 outcome measures[64, 76, 78, 79]) or mixed/null (three outcome measures[80–82]). Driving with  
34 detectable concentrations of THC was most often found to increase following decriminalization  
35 or legal regulation (five of eight outcome measures; [83–87]), but these studies were of lower  
36 average quality ( $X=12.0$ ).  
37  
38  
39  
40  
41  
42  
43  
44  
45  
46  
47  
48  
49  
50  
51  
52  
53  
54

### 55 **Impacts of Decriminalization**

56  
57  
58  
59  
60

1  
2  
3 Of the 19 studies evaluating impacts of decriminalization, six measured the prevalence of  
4 use of the decriminalized substance with eight unique outcome measures. No association was  
5 detected for all but three outcomes; following cannabis decriminalization lifetime use increased  
6 among adults in South Australia,[31] while past-month use increased among 12<sup>th</sup> graders but not  
7 younger students in California,[56] relative to the rest of the country in both cases. After peyote  
8 use for ceremonial purposes was decriminalized in the U.S. in 1994, self-reported use increased  
9 among American Indians.[88] Three studies evaluated relationships between decriminalization  
10 and drug-related criminal justice involvement in Mexico and the United States. One high-quality  
11 study found that decriminalization positively influenced criminal justice involvement: in five  
12 U.S. states, arrests for cannabis possession decreased amongst youth and adults.[89] When  
13 possession of small amounts of cannabis was decriminalized in the 1970s in Nebraska, however,  
14 the mean monthly number of arrests did not change, while cannabis-related prosecutions  
15 increased among youth.[90] In Tijuana, Mexico, decriminalization of all drugs had no apparent  
16 impact on the number of drug possession arrests.[53] Two historic and one recent study  
17 measured health care utilization. U.S. states that decriminalized cannabis in the 1970s saw  
18 greater emergency department visits related to cannabis, but decreased visits related to other  
19 drugs.[60] In Colorado, U.S., decriminalization was associated with increased emergency  
20 department visits for cyclic vomiting.[62] Addiction treatment utilization, health care and non-  
21 health-care costs, driving after use, price of drugs, availability of drugs, frequency of use, and  
22 attitudes towards use and perceived harmfulness were each evaluated in only one or two studies  
23 of decriminalization.  
24  
25  
26  
27  
28  
29  
30  
31  
32  
33  
34  
35  
36  
37  
38  
39

## 40 **DISCUSSION**

41  
42  
43 This systematic review identified 114 peer-reviewed publications and conference abstracts  
44 evaluating the impacts of drug decriminalization or legal regulation from 1970-2018. Within this  
45 search period, 88.6% were published in 2014 or later. This rapid growth in scholarship was  
46 driven by the implementation and subsequent evaluation of cannabis legalization in a number of  
47 U.S. states beginning in 2012, and knowledge production will surely continue to accelerate as  
48 longer-term data become available and as other jurisdictions (e.g., Canada, Uruguay) analyze the  
49 effects of recently implemented cannabis legalization. Indeed, a first study on the impacts of  
50 cannabis legalization on adolescent use in Uruguay was published in May 2020 (finding no  
51  
52  
53  
54  
55  
56  
57  
58  
59  
60

1  
2  
3 impact on risk of use [91]). The present study provides an overview of the emerging literature  
4 based on our systematic review and suggests three key patterns.  
5  
6  
7

8 First, peer-reviewed longitudinal evaluations of drug decriminalization and legal regulation are  
9 overwhelmingly geographically concentrated in the U.S. and focused on cannabis legalization.  
10 Importantly, the lack of non-U.S. studies evaluating legal regulation of cannabis for medical use  
11 may reflect the more tightly controlled nature of medical cannabis regulation in other countries,  
12 and thus the more limited potential for population-level effects. It is notable that  
13 decriminalization in the absence of legal regulation was evaluated in only 18 studies (15.8%),  
14 despite being far more common globally than legal regulation. These gaps may hamper  
15 evidence-based drug law reform in countries that are less well-developed, play a substantial role  
16 in drug production and transit, or have different baseline levels of substance (mis)use as  
17 compared to the U.S.  
18  
19  
20  
21  
22  
23  
24  
25  
26

27 Second, prevalence of use was the predominant metric used to assess the impact of drug law  
28 reform, despite its limited clinical significance (e.g., much cannabis use is non-problematic) and  
29 limited responsiveness to drug policy. This is because ecological analyses have indicated little  
30 relationship between drug policies and prevalence of use,[52] as have studies assessing within-  
31 state change in use related to legal regulation.[21] These findings are supported by the  
32 preponderance of evidence synthesized in this review, although some variation is evident in  
33 relation to the specific provisions of legal reforms (e.g., liberal versus tightly regulated medical  
34 markets [92]). Impacts of legal cannabis regulation on prevalence and frequency of use continue  
35 to be evaluated, with recent data suggesting small increases among adults, but not youth.[93]  
36 Drug policies may be more able to influence the types of drugs that people use, drug-related risk  
37 behaviors, and modes of drug consumption.[94] Metrics to assess these outcomes, however, were  
38 lacking in the reviewed literature. For example, only one study (0.8%) investigated whether legal  
39 regulation of cannabis was associated with changes in the mode of cannabis consumption.[72]  
40 Although the prevalence of use was often measured alongside more clinically or socially  
41 significant metrics (e.g., prevalence of substance use disorders, educational outcomes among  
42 young adults), 42.2% of studies assessing substance use prevalence included that metric alone or  
43 in combination with a single drug-related attitude metric.  
44  
45  
46  
47  
48  
49  
50  
51  
52  
53  
54  
55  
56  
57  
58  
59  
60

1  
2  
3  
4  
5 Third, there was a lack of alignment between the stated policy objectives of drug law reform and  
6 the metrics used to assess its impact in the scientific literature. For instance, removal of criminal  
7 sanctions to prevent their negative sequelae is a key rationale for decriminalization and legal  
8 regulation,[12,13,95] but only four studies (3.5%) evaluated changes in drug-related criminal  
9 justice involvement following drug law reform. Similarly, improving the physical and mental  
10 health of people who (already) use drugs is a motivation for drug policy reform but no included  
11 studies examined mental or physical health outcomes (aside from substance use disorders) in this  
12 population. As a result, there is a risk that decisions on drug policy may be informed by  
13 inappropriate metrics. Promisingly, in recent months, additional studies assessing legal  
14 regulation that employ a range of criminal justice metrics have been published.[96,97, 98]  
15 Finally, despite ample evidence of the impact of criminalization on infectious disease  
16 transmission and acquisition risks,[5] we found no studies evaluating the impact of  
17 decriminalization on these outcomes.  
18  
19  
20  
21  
22  
23  
24  
25  
26  
27  
28

29 Both the included studies and our systematic review have important strengths and limitations.  
30 To our knowledge, we conducted the first review of all global literature on decriminalization and  
31 legal regulation and applied no language restrictions. All eligible articles identified were  
32 published in English; this may reflect a paucity of evaluation research published in other  
33 languages and/or limitations of our search strategy (e.g., some non-English journals may not be  
34 indexed in the 10 databases searched). In addition, we excluded grey literature, non-original  
35 research, and study designs that are not suited to evaluating policy effects (e.g., cross-sectional  
36 studies), but these restrictions narrowed the geographic scope of included studies. For example,  
37 two articles on Portugal were excluded as non-original research, but nevertheless provide  
38 important insight on impacts of decriminalization [99,100]. Despite restricting eligibility to more  
39 rigorous study designs, most included studies used relatively weaker eligible designs that are  
40 known to be vulnerable to pre-existing trends and confounding; only 22.8% and 5.3%  
41 respectively used controlled before-and-after or interrupted time series designs to address these  
42 threats to validity. The use of these study designs may be related to limited resources for  
43 prospective drug policy evaluations, with many studies relying on publicly available, routinely  
44 collected data. That the U.S. is unique in the extent to which data on drug use and related harms  
45  
46  
47  
48  
49  
50  
51  
52  
53  
54  
55  
56  
57  
58  
59  
60

1  
2  
3 are routinely collected helps to explain its over-representation in our review. Scoping reviews  
4 inclusive of grey literature and cross-sectional designs would be valuable for describing the full  
5 range of evaluations that have been conducted globally.  
6  
7  
8  
9

10 While beyond the scope of our high-level synthesis, the implementation and specific provisions  
11 of drug policies vary widely. Decriminalization policies vary in their definitions of quantities for  
12 personal use, application of administrative penalties, and the extent to which the law “on the  
13 books” is reflected in policing and criminal justice practice. Indeed, in some jurisdictions with  
14 nominal decriminalization, arrests for possession of small quantities of the decriminalized drugs  
15 remain routine.[53] Legal regulation models for cannabis are also heterogenous. For example,  
16 policies legally regulating cannabis for medical use may or may not allow for legal dispensaries,  
17 and this provision has been shown to substantially modify the impact of legal regulation on  
18 cannabis use.[101] To the extent that individual studies employed crude exposure measures (e.g.,  
19 presence versus absence of a law), they may have obscured context-dependent effects of drug  
20 law liberalization. Further, the impact of drug laws on drug use and related outcomes may be  
21 limited by a lack of public awareness of the details of local laws.[102]  
22  
23  
24  
25  
26  
27  
28  
29  
30  
31

32 Our use of vote-counting in this synthesis (i.e., categorizing individual outcome measures as  
33 indicating beneficial, harmful, mixed/subgroup-specific, or no statistically significant  
34 associations) is subject to the same limitation. Vote-counting should also be interpreted with  
35 caution in light of the heterogeneity of outcome definitions, the inherent arbitrariness of  
36 statistical significance thresholds, and the key distinction between statistical and clinical  
37 significance. In addition, many included studies are evaluating the same policies (e.g., cannabis  
38 legalization in western U.S. states), sometimes using overlapping data but drawing different  
39 conclusions based on analytic choices and timeframes. The existence of multiple datapoints for a  
40 particular outcome does not imply that the outcome has been well-studied across diverse  
41 contexts such that scientific consensus on its effects has been reached. Moreover, as illustrated  
42 by a recently published extension of the included article by Bachhuber et al.,[79] multiple high-  
43 quality studies may generate results that are later revealed to be spurious as additional follow-up  
44 data become availability. Specifically, Shover et al. demonstrated that the positive association  
45 reported between medical cannabis legalization and opioid overdose mortality in 1999-2010  
46  
47  
48  
49  
50  
51  
52  
53  
54  
55  
56  
57  
58  
59  
60

1  
2  
3 reversed direction in later years, suggesting that earlier findings of a protective effect should not  
4 be given causal interpretations.[103] This was foreshadowed in the included article by Powell et  
5 al., which found that the purportedly positive effect of medical cannabis legalization was  
6 attenuated in 2010-2013.[82] This scientific back-and-forth can be expected given that most  
7 included articles are evaluating legal changes introduced rather recently, and thus are examining  
8 early impacts with limited years of follow-up. Longer-term impacts of non-medical cannabis  
9 legalization, and how they might be influenced by increased commercialization, are yet to be  
10 seen.[104]  
11  
12  
13  
14  
15  
16  
17

## 18 **Conclusions**

19 The findings of this review indicate a need for a broadening of the metrics used to assess the  
20 impacts of drug decriminalization and legal regulation. Given the growing number of  
21 jurisdictions considering decriminalization or legal regulation of psychoactive drugs,[14–16] the  
22 disproportionate emphasis on metrics assessing drug use prevalence, as well as the limited geo-  
23 cultural diversity in evaluations, are concerning. Experts have called for a more fulsome  
24 approach to evaluating drug policies in line with public health and the United Nations  
25 Sustainable Development Goals, with attention to the full breath of health and social domains  
26 potentially impacted, including human rights and social inclusion (e.g., stigma), peace and  
27 security (e.g., drug market violence), development (e.g., labor market participation) drug market  
28 regulation (e.g., safety of the drug supply), and clinically-significant health metrics (e.g., drug-  
29 related morbidity).[105] Drawing on methods such as multi-criterion decision analysis,[19] the  
30 engagement of both scientists and policymakers in priority-setting may help to produce evidence  
31 that provides a more comprehensive understanding of the breadth of impacts that should be  
32 anticipated with drug law reform efforts. Funding will also be required to support rigorous  
33 prospective evaluations of legal reforms.  
34  
35  
36  
37  
38  
39  
40  
41  
42  
43  
44  
45  
46  
47

## 48 **Figure 1 Legend**

49 Metrics examined by included studies.

## 50 **Figure 2 Legend**

51 PRISMA Flow Diagram

## 52 **Figure 3 Legend**

1  
2  
3 Number of included studies from countries that implemented decriminalization or legal  
4 regulation by 2017  
5

6 **Note:** Policy changes were classified, following the review inclusion criteria, based on the implementation of a  
7 change to national or subnational law to decriminalize drug use and/or possession or to legalize at least one class of  
8 drugs. We did not evaluate the extent to which legal changes were reflected in policing and criminal justice practice.  
9 Implementation of cannabis legalization for medical purposes only is not reflected in this map.  
10

### 11 **Author contributions**

12 DW and AIS conceptualized and supervised the review. CZ designed and conducted the  
13 literature searches. AIS drafted the manuscript. SC, ZM, and AIS conducted screening and data  
14 extraction. NM contributed to drafting the manuscript and developing figures. All authors  
15 contributed to interpretation of findings and revising the manuscript for important intellectual  
16 content.  
17

### 18 **Acknowledgements**

19 The authors would like to thank Gelareh Ghaderi for assistance with screening and data  
20 extraction.  
21

### 22 **Funding**

23 This review was supported by the Canadian Institutes of Health Research (CIHR) via the  
24 Canadian Research Initiative on Substance Misuse (SMN-139150), the MAC AIDS Foundation,  
25 and the Open Society Foundations. Ayden Scheim was supported by a Canadian Institutes of  
26 Health Research Postdoctoral Fellowship. Nazlee Maghsoudi is supported by a CIHR Vanier  
27 Canada Graduate Scholarship. Dan Werb is supported by a U.S. National Institute on Drug  
28 Abuse Avenir Award (DP2- DA040256), a CIHR New Investigator Award, an Early Researcher  
29 Award from the Ontario Ministry of Research, Innovation and Science, and the St. Michael's  
30 Hospital Foundation.  
31

### 32 **Competing interests**

33 We have no competing interests to declare.  
34

### 35 **Data sharing statement**

36 All relevant data are contained within the article and supplementary materials.  
37  
38  
39  
40  
41  
42  
43  
44  
45  
46  
47  
48  
49  
50  
51  
52  
53  
54  
55  
56  
57  
58  
59  
60



## REFERENCES

1. United Nations Office on Drugs and Crime (UNODC). World Drug Report 2019. <https://wdr.unodc.org/wdr2019/index.html>. United Nations publication, Sales No. E.19.XI.9. Published June 2019. Accessed August 28, 2019.
2. Degenhardt L, Chiu W-T, Sampson N, et al. Toward a global view of alcohol, tobacco, cannabis, and cocaine use: findings from the WHO World Mental Health Surveys. *PLoS Med* 2008;5(7):e141. doi:10.1371/journal.pmed.0050141
3. Werb D, Kerr T, Nosyk B, et al. The temporal relationship between drug supply indicators: an audit of international government surveillance systems. *BMJ Open* 2013;3(9):e003077. doi:10.1136/bmjopen-2013-003077
4. Mathers BM, Degenhardt L, Phillips B, et al. Global epidemiology of injecting drug use and HIV among people who inject drugs: a systematic review. *Lancet* 2008;372(9651):1733–1745. doi:10.1016/S0140-6736(08)61311-2
5. DeBeck K, Cheng T, Montaner JS, et al. HIV and the criminalisation of drug use among people who inject drugs: a systematic review. *Lancet HIV* 2017;4(8):e357-374 . doi:10.1016/S2352-3018(17)30073-5
6. Unick GJ, Rosenblum D, Mars S, et al. Intertwined epidemics: national demographic trends in hospitalizations for heroin-and opioid-related overdoses, 1993–2009. *PloS One* 2013;8(2):e54496. doi:10.1371/journal.pone.0054496
7. Jürgens R, Csete J, Amon JJ, et al. People who use drugs, HIV, and human rights. *Lancet* 2010;376(9739):475–485. doi:10.1016/S0140-6736(10)60830-6
8. Amon J, Pearshouse R, Cohen J, et al. Compulsory drug detention centers in China, Cambodia, Vietnam, and Laos: health and human rights abuses. *Health Hum Rights* 2013;15(2):124–137.
9. Werb D, Rowell G, Guyatt G, et al. Effect of drug law enforcement on drug market violence: a systematic review. *Int J Drug Policy* 2011;22(2):87–94. doi:10.1016/j.drugpo.2011.02.002
10. Csete J, Kamarulzaman A, Kazatchkine M, et al. Public health and international drug policy. *Lancet* 2016;387(10026):1427–1480. doi:10.1016/S0140-6736(16)00619-X
11. Global Commission on Drug Policy. Taking Control: Pathways to Drug Policies That Work. [https://www.globalcommissionondrugs.org/wp-content/uploads/2016/03/GCDP\\_2014\\_taking-control\\_EN.pdf](https://www.globalcommissionondrugs.org/wp-content/uploads/2016/03/GCDP_2014_taking-control_EN.pdf). Published September 2014. Accessed August 28, 2019.
12. Wood E, Werb D, Kazatchkine M, et al. Vienna Declaration: a call for evidence-based drug policies. *Lancet* 2010;376(9738):310–312. doi:10.1016/S0140-6736(10)60958-0

13. United Nations System Chief Executives Board for Coordination (CEB). Summary of Deliberations. <https://www.unsceb.org/CEBPublicFiles/CEB-2018-2-SoD.pdf>. (CEB/2018/2). Published January 18, 2019. Accessed August 28, 2019.
14. European Monitoring Centre for Drugs and Drug Addiction. Countries. [http://www.emcdda.europa.eu/countries\\_en](http://www.emcdda.europa.eu/countries_en). Accessed August 28, 2019.
15. Tharoor A. Map: Drug Decriminalisation Around the World. <https://www.talkingdrugs.org/decriminalisation>. Published August 23, 2018. Accessed August 28, 2019.
16. Eastwood N, Fox E, Rosmarin A. A Quiet Revolution: Drug Decriminalisation Across the Globe. [https://www.citywide.ie/download/pdf/a\\_quiet\\_revolution\\_decriminalisation\\_across\\_the\\_globe.pdf](https://www.citywide.ie/download/pdf/a_quiet_revolution_decriminalisation_across_the_globe.pdf). Published March 2016. Accessed August 28, 2018.
17. Nutt D, King LA, Saulsbury W, et al. Development of a rational scale to assess the harm of drugs of potential misuse. *Lancet* 2007;369(9566):1047–1053. doi:10.1016/S0140-6736(07)60464-4
18. Nutt DJ, King LA, Phillips LD. Drug harms in the UK: a multicriteria decision analysis. *Lancet* 2010;376(9752):1558–1565. doi:10.1016/S0140-6736(10)61462-6
19. Rogeberg O, Bergsvik D, Phillips LD, et al. A new approach to formulating and appraising drug policy: a multi-criterion decision analysis applied to alcohol and cannabis regulation. *Int J Drug Policy* 2018;56:144–152. doi:10.1016/j.drugpo.2018.01.019
20. Dirisu O, Shickle D, Elsey H. Influence of legal status on the uptake of cannabis in young people. *Curr Opin Psychiatry* 2016;29:231–5. doi:10.1097/YCO.0000000000000253
21. Sarvet AL, Wall MM, Fink DS, et al. Medical marijuana laws and adolescent marijuana use in the United States: a systematic review and meta-analysis. *Addiction* 2018;113(6):1003–1016. doi:10.1111/add.14136
22. Melchior M, Nakamura A, Bolze C, et al. Does liberalisation of cannabis policy influence levels of use in adolescents and young adults? A systematic review and meta-analysis. *BMJ Open* 2019;9(7):e025880. doi:10.1136/bmjopen-2018-02588023
23. Popay J, Roberts H, Sowden A, et al. Guidance on the Conduct of Narrative Synthesis in Systematic Reviews: A Product from the ESRC Methods Programme, Version 1. <https://www.lancaster.ac.uk/shm/research/nssr/research/dissemination/publications.php>. Published April 2006. Accessed August 28, 2019.
24. Moher D, Liberati A, Tetzlaff J, et al. Preferred Reporting Items for Systematic Reviews and Meta-Analyses: the PRISMA Statement. *PLoS Med* 2009;6(7). doi:10.1371/journal.pmed.1000097

- 1  
2  
3 25. Downs SH, Black N. The feasibility of creating a checklist for the assessment of the  
4 methodological quality both of randomised and non-randomised studies of health care  
5 interventions. *J Epidemiol Community Health* 1998;52(6):377–384.  
6
- 7  
8 26. Kerr WC, Lui C, Ye Y. Trends and age, period and cohort effects for marijuana use  
9 prevalence in the 1984-2015 US National Alcohol Surveys. *Addiction* 2018;113(3):473–481.  
10 doi:10.1111/add.14031  
11
- 12 27. Allshouse AA, Metz TD. Trends in self-reported and urine toxicology (UTOX)-detected  
13 maternal marijuana use before and after legalization. *Am J Obstet Gynecol*  
14 2016;214(1):S444–S445.  
15
- 16 28. Straub H, Drennan KJ, Pflugeisen B. Maternal marijuana use: a natural experiment from  
17 prohibition to access. *Am J Obstet Gynecol* 2017;216 (S1):S554–S555.  
18
- 19 29. Cassidy TA, Green T, Garg P, et al. Up in smoke? Marijuana initiation and prevalence trends  
20 in Colorado: 2008 to 2014. *Drug Alcohol Depend* 2015;156:e39.  
21  
22
- 23 30. Jones JT, Baldwin A, Shu I. A comparison of meconium screening outcomes as an indicator  
24 of the impact of state-level relaxation of marijuana policy. *Drug Alcohol Depend*  
25 2015;156:e104–e105.  
26
- 27 31. Donnelly N, Hall W, Christie P. The effects of the Cannabis Expiation Notice System on the  
28 prevalence of cannabis use in South Australia: evidence from the National Drug Strategy  
29 Household Surveys 1985-95. *Drug Alcohol Rev* 2000;19(3):265–269.  
30  
31
- 32 32. Wall MM, Mauro C, Hasin DS, et al. Prevalence of marijuana use does not differentially  
33 increase among youth after states pass medical marijuana laws: commentary on Stolzenberg  
34 et al. (2015) and reanalysis of US National Survey on Drug Use in Households data 2002-  
35 2011. *Int J Drug Policy* 2016;29:9–13.  
36
- 37 33. Choo EK, Benz M, Zaller N, et al. The impact of state medical marijuana legislation on  
38 adolescent marijuana use. *J Adolesc Health* 2014;55(2):160–166.  
39  
40
- 41 34. Williams J, Bretteville-Jensen AL. Does liberalizing cannabis laws increase cannabis use? *J*  
42 *Health Econ* 2014;36:20–32.  
43
- 44 35. Hasin DS, Wall M, Keyes KM, et al. Medical marijuana laws and adolescent marijuana use  
45 in the USA from 1991 to 2014: results from annual, repeated cross-sectional surveys. *Lancet*  
46 *Psychiatry* 2015;2(7):601–608.  
47
- 48 36. Wagner J, Leonard J, Jensen J, et al. The impact of marijuana legalization on reversible  
49 cerebral vasoconstriction syndrome. *Neurology* 2016;86(S16):115.  
50  
51
- 52 37. Merker AM, Riaz M, Friedman S, et al. Legalization of medicinal marijuana has minimal  
53 impact on use patterns in patients with inflammatory bowel disease. *Inflamm Bowel Dis*  
54 2018;24(11):2309–2314.  
55  
56  
57  
58  
59

- 1
- 2
- 3
- 4 38. Parnes JE, Smith JK, Conner BT. Reefer madness or much ado about nothing? Cannabis
- 5 legalization outcomes among young adults in the United States. *Int J Drug Policy*
- 6 2018;56:116–120.
- 7
- 8 39. Keyes KM, Wall M, Cerda M, et al. How does state marijuana policy affect US youth?
- 9 Medical marijuana laws, marijuana use and perceived harmfulness: 1991-2014. *Addiction*
- 10 2016;111(12):2187–2195.
- 11
- 12 40. Harper S, Strumpf EC, Kaufman JS. Do medical marijuana laws increase marijuana use?
- 13 Replication study and extension. *Ann Epidemiol* 2012;22(3):207–212.
- 14
- 15 41. Wall MM, Poh E, Cerda M, et al. Adolescent marijuana use from 2002 to 2008: higher in
- 16 states with medical marijuana laws, cause still unclear. *Ann Epidemiol* 2011;21(9):714–716.
- 17
- 18 42. Martins SS, Mauro CM, Santaella-Tenorio J, et al. State-level medical marijuana laws,
- 19 marijuana use and perceived availability of marijuana among the general US population.
- 20 *Drug Alcohol Depend* 2016;169:26–32.
- 21
- 22 43. Cerda M, Wall M, Feng T, et al. Association of state recreational marijuana laws with
- 23 adolescent marijuana use. *JAMA Pediatr* 2017;171(2):142–149.
- 24
- 25 44. Mauro C, Santaella J, Kim JH, et al. Does perceived availability of marijuana explain
- 26 changes in marijuana use after medical marijuana law implementation among US adults?
- 27 *Drug Alcohol Depend* 2017;171:e134.
- 28
- 29 45. Kosterman R, Bailey JA, Guttmanova K, et al. Marijuana legalization and parents’
- 30 attitudes, use, and parenting in Washington state. *J Adolesc Health* 2016;59(4):450–456.
- 31
- 32 46. Hasin D, Sarvet A, Cerda M, et al. Driving under the influence of alcohol or cannabis in the
- 33 U.S., 1991-1992 to 2012-2013: Relationship to state medical marijuana laws. *Alcohol Clin*
- 34 *Exp Res* 2017;41:250A.
- 35
- 36 47. Donnelly N, Hall W, Christie P. The effects of partial decriminalisation on cannabis use in
- 37 South Australia, 1985 to 1993. *Aust J Public Health* 1995;19(3):281–287.
- 38
- 39 48. Adam C, Raschzok A. Cannabis policy and the uptake of treatment for cannabis-related
- 40 problems. *Drug Alcohol Rev* 2017;36(2):171–177.
- 41
- 42 49. Cervený J, Chomynova P, Mravčík V, et al. Cannabis decriminalization and the age of onset
- 43 of cannabis use. *Int J Drug Policy* 2017;43:122–129.
- 44
- 45 50. Reith I. Two plants are better than one? *Contemp Drug Probl* 2015;42(4):259–273.
- 46
- 47 51. Félix S, Portugal P. Drug decriminalization and the price of illicit drugs. *Int J Drug Policy*
- 48 2017;39:121–129.
- 49
- 50 52. Gonçalves R, Lourenço A, da Silva SN. A social cost perspective in the wake of the
- 51 Portuguese strategy for the fight against drugs. *Int J Drug Policy* 2015;26(2):199–209.
- 52
- 53
- 54
- 55
- 56
- 57
- 58
- 59
- 60

- 1
- 2
- 3
- 4 53. Arredondo J, Gaines T, Manian S, et al. The law on the streets: evaluating the impact of
- 5 Mexico's drug decriminalization reform on drug possession arrests in Tijuana, Mexico. *Int J*
- 6 *Drug Policy* 2018;54:1-8. doi:10.1016/j.drugpo.2017.12.006.
- 7
- 8 54. Feige C, Miron JA. The opium wars, opium legalization and opium consumption in China.
- 9 *Appl Econ Lett* 2008;15(12):911–913.
- 10
- 11 55. Larimer ME, Lee CM, Kilmer JR, et al. Risk perception, access, and use of marijuana among
- 12 young adults following legalization in Washington state. *Alcohol Clin Exp Res*
- 13 2015;39:261A.
- 14
- 15 56. Miech R, Johnston LA, O'Malley P, et al Trends in use of and attitudes toward marijuana
- 16 among youth before and after decriminalization: the case of California 2007-2013. *Drug*
- 17 *Alcohol Depend* 2015;156:e151–e152.
- 18
- 19 57. Wen H, Hockenberry JM, Druss BG. The effect of medical marijuana laws on marijuana-
- 20 related attitude and perception among US adolescents and young adults. *Prev Sci*
- 21 2019;20(2):215–223.
- 22
- 23 58. Wang GS, Davies SD, Halmo LS, et al. Impact of marijuana legalization in Colorado on
- 24 adolescent emergency and urgent care visits. *J Adolesc Health* 2018;63(2):239–241.
- 25
- 26 59. Wang GS, Hall K, Vigil D, et al. Marijuana and acute health care contacts in Colorado. *Prev*
- 27 *Med* 2017;104:24–30.
- 28
- 29 60. Model KE. The effect of marijuana decriminalization on hospital emergency room drug
- 30 episodes 1975-1978. *J Am Stat Assoc* 1993;88(423):737–747.
- 31
- 32 61. Kim HS, Hall KE, Genco EK, et al. Marijuana tourism and emergency department visits in
- 33 Colorado. *N Engl J Med* 2016;374(8):797-798.
- 34
- 35 62. Kim HS, Anderson JD, Saghabi O, et al. Cyclic vomiting presentations following marijuana
- 36 liberalization in Colorado. *Acad Emerg Med* 2015;22(6):694–699.
- 37
- 38 63. Calcaterra SL, Keniston A, Hull ML. The impact of the legalization of recreational marijuana
- 39 on a safety-net health system. *J Gen Intern Med* 2018;33(S2):S361.
- 40
- 41 64. Shi Y. Medical marijuana policies and hospitalizations related to marijuana and opioid pain
- 42 reliver. *Drug Alcohol Depend* 2017;173:144–150.
- 43
- 44 65. Wen H, Hockenberry JM. Association of medical and adult-use marijuana laws with opioid
- 45 prescribing for Medicaid enrollees. *JAMA Intern Med* 2018;178(5):673–679.
- 46
- 47 66. Bradford AC, Bradford WD, Abraham A, et al. Association between US state medical
- 48 cannabis laws and opioid prescribing in the Medicare Part D Population. *JAMA Intern Med*
- 49 2018;178(5):667–672.
- 50
- 51
- 52
- 53
- 54
- 55
- 56
- 57
- 58
- 59
- 60



- 1
- 2
- 3
- 4 67. Kim JH, Santaella J, Cerda M, et al. Medical marijuana laws and annual opioid analgesic
- 5 sales in the United States. *Drug Alcohol Depend* 2015;156:e111.
- 6
- 7 68. Liang D, Bao Y, Wallace M, et al. Medical cannabis legalization and opioid prescriptions:
- 8 evidence on US Medicaid enrollees during 1993-2014. *Addiction* 2018;113(11):2060–2070.
- 9
- 10 69. Shah AB, Hayes CJ, Lakkad M, et al. Impact of medical marijuana legalization on opioid
- 11 use, chronic opioid use and high-risk opioid use. *Value Health* 2018;21(S1):S247.
- 12
- 13 70. Bradford AC, Bradford WD. Medical marijuana laws reduce prescription medication use in
- 14 Medicare Part D. *Health Aff (Millwood)* 2016;35(7):1230–1236.
- 15
- 16 71. Bradford AC, Bradford WD. Medical marijuana laws may be associated with a decline in the
- 17 number of prescriptions for Medicaid enrollees. *Health Aff (Millwood)* 2017;36(5):945–951.
- 18
- 19 72. Harpin SB, Brooks-Russell A, Ma M, et al. Adolescent marijuana use and perceived ease of
- 20 access before and after recreational marijuana implementation in Colorado. *Subst Use*
- 21 *Misuse* 2018;53(3):451–456.
- 22
- 23 73. Nappe T, Banerji S, Hoyte C. Drug exposure trends since decriminalization of marijuana in
- 24 Colorado. *Clin Toxicol* 2016;54(8):712–713.
- 25
- 26 74. Onders B, Casavant MJ, Spiller HA, et al. Marijuana Exposure among children younger than
- 27 six years in the United States. *Clin Pediatr* 2016;55(5):428–436.
- 28
- 29 75. Wang GS, Le Lait MC, Deakyne SJ, et al. Unintentional pediatric exposures to marijuana in
- 30 Colorado, 2009-2015. *JAMA Pediatr* 2016;170(9):e160971.
- 31
- 32 76. Banerji S, Hoyte C. Marijuana and synthetic cannabinoid patterns in a US state with
- 33 legalized marijuana: a 5-year NPDS review. *Clin Toxicol* 2017;55 (5):418–419.
- 34
- 35 77. Bjordal M, Garrard A. The impact of marijuana legalization on poison center calls in the
- 36 evergreen state. *Clin Toxicol* 2015;53(7):694.
- 37
- 38 78. Livingston MD, Barnett TE, Delcher C, et al. Recreational cannabis legalization and opioid-
- 39 related deaths in Colorado, 2000-2015. *Am J Public Health* 2017;107(11):1827–1829.
- 40
- 41 79. Bachhuber MA, Saloner B, Cunningham CO, et al. Medical cannabis laws and opioid
- 42 analgesic overdose mortality in the United States, 1999-2010. *JAMA Intern Med*
- 43 2014;174(10):1668–1673.
- 44
- 45 80. Rohda J, Smith K, Smith L, et al. Impact of recreational marijuana legalization on synthetic
- 46 cannabinoid use. *Clin Toxicol* 2017;55(7):780.
- 47
- 48 81. Phillips E, Gazmararian J. Implications of prescription drug monitoring and medical
- 49 cannabis legislation on opioid overdose mortality. *J Opioid Manag* 2017;13(4):229–239.
- 50
- 51
- 52
- 53
- 54
- 55
- 56
- 57
- 58
- 59
- 60

- 1  
2  
3 82. Powell D, Pacula RL, Jacobson M. Do medical marijuana laws reduce addictions and deaths  
4 related to pain killers? *J Health Econ* 2018;58:29–42.  
5  
6 83. Steinemann S, Galanis D, Nguyen T, et al. Motor vehicle crash fatalities and  
7 undercompensated care associated with legalization of marijuana. *J Trauma Acute Care Surg*  
8 2018;85(3):566–571.  
9  
10 84. Urfer S, Morton J, Beall V, et al. Analysis of DELTA9-tetrahydrocannabinol driving under  
11 the influence of drugs cases in Colorado from January 2011 to February 2014. *J Anal Toxicol*  
12 2014;38(8):575–581.  
13  
14 85. Pollini RA, Romano E, Johnson MB, et al. The impact of marijuana decriminalization on  
15 California drivers. *Drug Alcohol Depend* 2015;150:135–140.  
16  
17 86. Ramirez A. Marijuana, other drugs, and alcohol use by drivers in Washington state. *Alcohol*  
18 *Clin Exp Res* 2017;41:314A.  
19  
20 87. Couper FJ, Peterson BL. The prevalence of marijuana in suspected impaired driving cases in  
21 Washington state. *J Anal Toxicol* 2014;38(8):569–574.  
22  
23 88. Prue B. Prevalence of reported peyote use 1985-2010 effects of the American Indian  
24 Religious Freedom Act of 1994. *Am J Addict* 2014;23(2):156–161.  
25  
26 89. Grucza RA, Vuolo M, Krauss MJ, et al. Cannabis decriminalization: A study of recent policy  
27 change in five U.S. states. *Int J Drug Policy* 2018;59:67–75.  
28  
29 90. Suggs DL. A qualitative and quantitative analysis of the impact of Nebraska's  
30 decriminalization of marijuana. *Law Hum Behav* 1981;5(1):45–71.  
31  
32 91. Laqueur H, Rivera-Aguirre A, Shev A, et al. The impact of cannabis legalization in Uruguay  
33 on adolescent cannabis use. *Int J Drug Policy* 2020;80:102748.  
34  
35 92. Leung J, Chiu CYV, Stjepanović D, et al. Has the legalisation of medical and recreational  
36 cannabis use in the USA affected the prevalence of cannabis use and cannabis use disorders?  
37 *Curr Addict Rep* 2018;5:403–17.  
38  
39 93. Cerdá M, Mauro C, Hamilton A, et al. Association between recreational marijuana  
40 legalization in the United States and changes in marijuana use and cannabis use disorder  
41 from 2008 to 2016. *JAMA Psychiatry* 2020;77:165–71.  
42 doi:10.1001/jamapsychiatry.2019.3254  
43  
44 94. Kerr T, Small W, Wood E. The public health and social impacts of drug market enforcement:  
45 a review of the evidence. *Int J Drug Policy* 2005;(16):210–220.  
46  
47 95. McGinty EE, Samples H, Bandara SN, et al. The emerging public discourse on state  
48 legalization of marijuana for recreational use in the US: analysis of news media coverage,  
49 2010–2014. *Prev Med* 2016;90:114–120. doi:<https://doi.org/10.1016/j.ypmed.2016.06.040>  
50  
51  
52  
53  
54  
55  
56  
57  
58  
59



- 1  
2  
3 96. Firth CL, Maher JE, Dilley JA, et al. Did marijuana legalization in Washington state reduce  
4 racial disparities in adult marijuana arrests? *Subst Use Misuse* 2019;54(9):1582-1587.  
5 doi:10.1080/10826084.2019.1593007  
6
- 7 97. Plunk AD, Peglow SL, Harrell PT, et al. Youth and adult arrests for cannabis possession  
8 after decriminalization and legalization of cannabis. *JAMA Pediatr* 2019;173(8):763–769.  
9 doi:10.1001/jamapediatrics.2019.1539  
10
- 11 98. Firth CL, Hajat A, Dilley JA, Braun M, Maher JE. Implications of Cannabis Legalization on  
12 Juvenile Justice Outcomes and Racial Disparities. *Am J Prev Med*. 2020;58(4):562-569.  
13  
14
- 15 99. Hughes CE, Stevens A. What can we learn from the Portuguese decriminalization of illicit  
16 drugs? *Br J Criminol*. 2010;50(6):999-1022.  
17
- 18 100. Laqueur H. Uses and abuses of drug decriminalization in Portugal. *Law Soc Inq*.  
19 2015;40(3):746-781.  
20
- 21 101. Pacula RL, Powell D, Heaton P, et al. Assessing the effects of medical marijuana laws on  
22 marijuana use: the devil is in the details. *J Policy Anal Manage* 2015;34(1):7–31.  
23  
24
- 25 102. MacCoun R, Pacula RL, Chriqui J, et al. Do citizens know whether their state has  
26 decriminalized marijuana? Assessing the perceptual component of deterrence theory. *Rev*  
27 *Law Econ* 2009;5:347–71.  
28
- 29 103. Shover CL, Davis CS, Gordon S, et al. Association between medical cannabis laws and  
30 opioid overdose mortality has reversed over time. *PNAS* 2019;116(26):12624-12626.  
31 doi:10.1073/pnas.1903434116/  
32  
33
- 34 104. Hall W, Stjepanović D, Caulkins J, et al. Public health implications of legalising the  
35 production and sale of cannabis for medicinal and recreational use. *The Lancet*  
36 2019;394:1580–90. doi:10.1016/S0140-6736(19)31789-1  
37
- 38 105. International Expert Group on Drug Policy Metrics. Aligning Agendas: Drugs, Sustainable  
39 Development, and the Drive for Policy Coherence. [https://www.ipinst.org/wp-](https://www.ipinst.org/wp-content/uploads/2018/02/1802_Aligning-Agendas.pdf)  
40 [content/uploads/2018/02/1802\\_Aligning-Agendas.pdf](https://www.ipinst.org/wp-content/uploads/2018/02/1802_Aligning-Agendas.pdf). Published February 2018. Accessed  
41 August 28, 2019.  
42  
43  
44  
45  
46  
47  
48  
49  
50  
51  
52  
53  
54  
55  
56  
57  
58  
59  
60

1  
2  
3  
4  
5  
6  
7  
8  
9  
10  
11  
12  
13  
14  
15  
16  
17  
18  
19  
20  
21  
22  
23  
24  
25  
26  
27  
28  
29  
30  
31  
32  
33  
34  
35  
36  
37  
38  
39  
40  
41  
42  
43  
44  
45  
46  
47  
48  
49  
50  
51  
52  
53  
54  
55  
56  
57  
58  
59  
60



Metrics examined by included studies.



PRISMA Flow Diagram

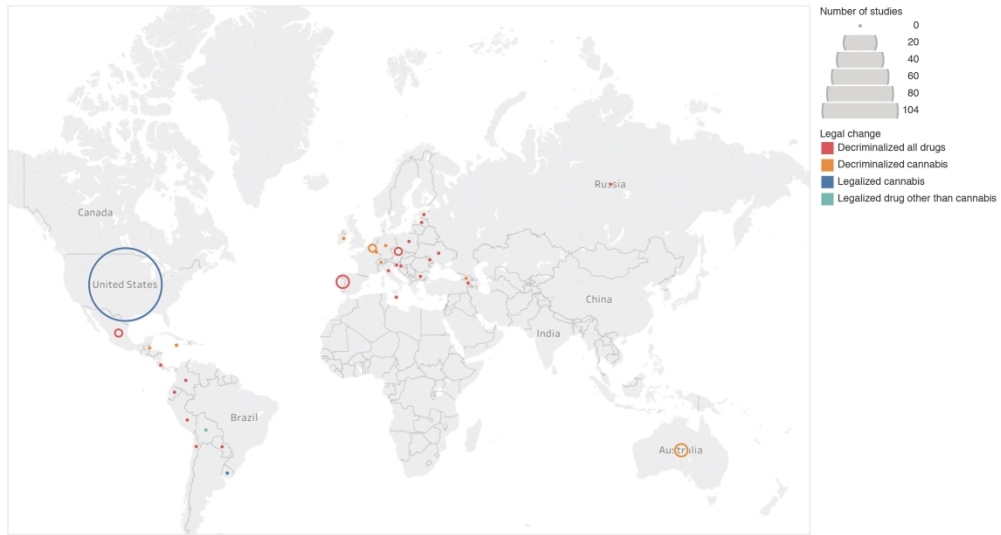

Number of included studies from countries that implemented decriminalization or legal regulation by 2017  
 Note: Policy changes were classified, following the review inclusion criteria, based on the implementation of a change to national or subnational law to decriminalize drug use and/or possession or to legalize at least one class of drugs. We did not evaluate the extent to which legal changes were reflected in policing and criminal justice practice. Implementation of cannabis legalization for medical purposes only is not reflected in this map.

Supplementary Table 1. Included Studies

|    | Reference         | Setting<br>Legal change                                                               | Study design,<br>dates<br>[Comparison<br>group or<br>condition]                                                                            | Sampling<br>approach<br>Sample size                                                                                         | Outcomes                                                                                                                                                                                                                                                                     | Effects                                                                                                                                                                                                                                                                                                                                                                                                                                                                                                                                                                                            | Quality |
|----|-------------------|---------------------------------------------------------------------------------------|--------------------------------------------------------------------------------------------------------------------------------------------|-----------------------------------------------------------------------------------------------------------------------------|------------------------------------------------------------------------------------------------------------------------------------------------------------------------------------------------------------------------------------------------------------------------------|----------------------------------------------------------------------------------------------------------------------------------------------------------------------------------------------------------------------------------------------------------------------------------------------------------------------------------------------------------------------------------------------------------------------------------------------------------------------------------------------------------------------------------------------------------------------------------------------------|---------|
| 1. | Adam 2017         | Belgium,<br>Portugal<br><br>Cannabis<br>decriminalization                             | Controlled<br>before-and-<br>after, 1996-2010<br><br>[Austria,<br>Germany,<br>Greece, Ireland,<br>Italy,<br>Netherlands,<br>Spain, Sweden] | Convenience<br>sampling<br><br>89 treatment<br>units                                                                        | <i>Addiction treatment<br/>utilization</i> : # of first-time drug<br>treatment clients reporting<br>cannabis as primary<br>indication, per reporting<br>treatment unit<br><br><i>Prevalence of use,<br/>decriminalized/regulated<br/>drug(s)</i> : past-year cannabis<br>use | No significant effect of<br>decriminalization. $B = 2.66$ , $SE=8.72$ ,<br>$P=0.770$<br><br>No significant effect of<br>decriminalization. $B = 1.88$ , $SE=1.77$ ,<br>$P=0.310$                                                                                                                                                                                                                                                                                                                                                                                                                   | 13      |
| 2. | Allshouse<br>2016 | United States<br><br>Legal regulation<br>of cannabis for<br>recreational use<br>(RCL) | Repeated cross-<br>sectional study,<br>2013; 2014                                                                                          | Population-<br>based;<br>Admin<br>record data<br><br>N=743                                                                  | <i>Prevalence of use,<br/>decriminalized/regulated<br/>drug(s)</i> : self-reported cannabis<br>use during pregnancy<br><br><i>Prevalence of use,<br/>decriminalized/regulated<br/>drug(s)</i> : cannabis-positive<br>urine screen during pregnancy                           | No significant effect of RCL (from 4.5%<br>to<br>7.5%, $p=0.06$ )<br><br>No significant effect of RCL. Adjusted<br>prevalence difference = 0.03, $P=0.99$ .                                                                                                                                                                                                                                                                                                                                                                                                                                        | A<br>*  |
| 3. | Anderson<br>2013  | United States<br><br>Legal regulation<br>of cannabis for<br>medical use<br>(MCL)      | Repeated cross-<br>sectional study,<br>1990-2010                                                                                           | Convenience<br>sampling<br><br><i>Study A</i> :<br>8,271<br>cannabis<br>purchases<br><i>Study B</i> :<br>1071<br>fatalities | <i>Price of drugs</i> : median price<br>of cannabis in state and year<br><br><i>Accidents, motor vehicle</i> :<br>traffic fatality outcomes per<br>100,000; primary outcome is<br>total fatalities.                                                                          | 9.8% decrease in price of high-quality<br>cannabis, controlling for state-specific<br>time trends. Lagged models indicate<br>price reductions not significant until 4 <sup>th</sup><br>year after MCL. Effects on price of low-<br>quality cannabis largely statistically<br>insignificant.<br><br>No significant change in fatalities,<br>controlling for state-specific time trends.<br>In lagged models, MCL associated with<br>8-13% fatality reductions in years 1-4,<br>with reduction attenuated and no longer<br>significant after 5 years, controlling for<br>state-specific time trends. | 11      |

|    |                |                                                                     |                                                                                         |                                                                   |                                                                                                                                          |                                                                                                                                                                                                             |    |
|----|----------------|---------------------------------------------------------------------|-----------------------------------------------------------------------------------------|-------------------------------------------------------------------|------------------------------------------------------------------------------------------------------------------------------------------|-------------------------------------------------------------------------------------------------------------------------------------------------------------------------------------------------------------|----|
| 4. | Anderson 2014  | United States<br>Legal regulation of cannabis for medical use (MCL) | Controlled before-and-after study, 1990-2007<br><br>[States that did not implement MCL] | Population-based;<br>Admin record data                            | <i>Mental health conditions, suicide, or self-harm</i> : annual suicide rates per 100,000 among individuals 15+                          | No difference in suicide rate overall. Reduction among males, (log) rate difference = -0.047* (95% CI: -0.089, -0.005). By age, significant reductions among males from 20-39 and among females $\geq 60$ . | 16 |
| 5. | Anderson 2018  | United States<br>Legal regulation of cannabis for medical use (MCL) | Repeated cross-sectional study, 1992-2015                                               | Population-based;<br>Admin record data<br><br>N= 1224 state-years | <i>Accidents, other</i> : Workplace fatalities by state from the Bureau of Labor Statistics                                              | No difference in fatality rate overall. Reduction among those aged 25-44 only. Adjusted rate ratio = 0.805 (95% CI: 0.662, 0.979).                                                                          | 15 |
| 6. | Anderson 2015  | United States<br>Legal regulation of cannabis for medical use (MCL) | Repeated cross-sectional study, 1993-2011                                               | Population-based;<br>School-based survey<br><br>N=862,695         | <i>Prevalence of use, decriminalized/regulated drug(s)</i> : past 30 day use                                                             | No significant effect of MCL: % difference, combined national and state YRBS = -0.007, SE=0.011, p>0.05.                                                                                                    | 15 |
|    |                |                                                                     |                                                                                         |                                                                   | <i>Frequency of use, decriminalized/regulated drug(s)</i> : used $\geq 10$ times in past 30 days                                         | No significant effect of MCL: % difference, combined national and state YRBS = -0.004, SE=0.006, p>0.05.                                                                                                    |    |
|    |                |                                                                     |                                                                                         |                                                                   | <i>Actual availability of decriminalized/regulated drug(s)</i> : offered, sold, or given an illegal drug on school property in past year | MCL associated with reduction in availability, % difference, combined national and state YRBS = -0.020, SE=0.008, p<0.05;                                                                                   |    |
| 7. | Arredondo 2018 | Mexico<br>Decriminalization of all drugs                            | Repeated cross-sectional study, 2009-2014                                               | Population-based;<br>Admin record data                            | <i>Criminal justice involvement</i> : Monthly number of drug possession arrests per precinct.                                            | Decriminalization law not associated with arrests, Beta for ln(possession arrests)=0.187, SE=0.151, p>0.05.                                                                                                 | 14 |
|    |                |                                                                     |                                                                                         |                                                                   | <i>Crime (non-drug)</i> : Violent crime arrests (injuries, robbery, homicides)                                                           | Law not associated with arrests, b=0.001, SE=0.090, p>0.05.                                                                                                                                                 |    |

|     |                |                                                                                              |                                                                                           |                                                               |                                                                                                                                                                                                            |                                                                                                                                                                                             |     |
|-----|----------------|----------------------------------------------------------------------------------------------|-------------------------------------------------------------------------------------------|---------------------------------------------------------------|------------------------------------------------------------------------------------------------------------------------------------------------------------------------------------------------------------|---------------------------------------------------------------------------------------------------------------------------------------------------------------------------------------------|-----|
|     |                |                                                                                              |                                                                                           |                                                               | <i>Crime (non-drug):</i><br>Non-violent arrests (theft, possession of stolen car)                                                                                                                          | Law not associated with arrests, $b=-0.043$ , $SE=0.071$ , $p>0.05$ .                                                                                                                       |     |
| 8.  | Aydelotte 2017 | United States<br><br>Legal regulation of cannabis for recreational use (RCL)                 | Controlled before-and-after study, 2009-2015<br><br>[8 similar states without MCL or RCL] | Population-based;<br>Admin record data<br><br>N=60,737        | <i>Accidents, motor vehicle:</i><br>Annual number of motor vehicle crash fatalities                                                                                                                        | RCL not associated with crash fatalities, adjusted difference in difference coefficient: +0.2 (95% CI: -0.4, +0.9).                                                                         | 15  |
| 9.  | Bachhuber 2014 | United States<br><br>Legal regulation of cannabis for medical use (MCL)                      | Interrupted time series study, 1999-2010                                                  | Population-based;<br>Admin record data                        | <i>Overdose or poisoning, other drug:</i> opioid analgesic overdose mortality rate                                                                                                                         | MCL associated with reduced mortality, adjusted percentage change in annual rate= -24.8% (95% CI: -37.5, -9.5), $p = .003$ .                                                                | 16  |
| 10. | Banerji 2017   | United States<br><br>Legal regulation of cannabis for recreational use                       | Repeated cross-sectional study, 2011-2015                                                 | Population-based;<br>Admin record data<br><br>N=777 exposures | <i>Overdose or poisoning, decriminalized/regulated drug:</i> cannabis calls to poison control center<br><br><i>Overdose or poisoning, other drug:</i> synthetic cannabinoid calls to poison control center | Apparent increase (from 86 in 2011 to 231 in 2015); no statistical tests reported.<br><br>Apparent decrease (100 in 2013 and 17 in 2014); no statistical tests reported.                    | A * |
| 11. | Bell 2015      | United States<br><br>Legal regulation of cannabis for medical use (MCL) and recreational use | Repeated cross-sectional study, 2008-2014                                                 | Population-based;<br>Admin record data<br>N=29                | <i>Accidents, other:</i><br>hydrocarbon burns referred to the University of Colorado Hospital                                                                                                              | Before MCL (Jan 2008-Aug 2009): 0 cases<br>During MCL (Oct 2009-Dec 2013): 19 cases<br>During recreational legalization (Dec 2013-Aug 2014): 12 cases<br><br>No statistical tests reported. | 11  |
| 12. | Bjordal 2015   | United States<br><br>Legal regulation of cannabis for recreational use                       | Repeated cross-sectional study, 2013-2014                                                 | Population-based;<br>Admin record data<br><br>N=245 exposures | <i>Overdose or poisoning, decriminalized/regulated drug:</i> Cannabis calls to poison control center (p.694)                                                                                               | Apparent increase (from 158 in 2013 to 245 in 2014); no statistical tests reported.                                                                                                         | A * |



|     |               |                                                                     |                                                                                                              |                                                                                            |                                                                                                                                                                                                                                                                                                                                                                                                             |                                                                                                                                                                                                                                                                                                                                                                          |    |
|-----|---------------|---------------------------------------------------------------------|--------------------------------------------------------------------------------------------------------------|--------------------------------------------------------------------------------------------|-------------------------------------------------------------------------------------------------------------------------------------------------------------------------------------------------------------------------------------------------------------------------------------------------------------------------------------------------------------------------------------------------------------|--------------------------------------------------------------------------------------------------------------------------------------------------------------------------------------------------------------------------------------------------------------------------------------------------------------------------------------------------------------------------|----|
| 13. | Blachly 1976  | United States<br>Cannabis decriminalization                         | Uncontrolled before-and-after study, 1970; 1975                                                              | Convenience sampling<br>N=627 admissions                                                   | <i>Health services utilization:</i> % of drug abuse admissions to Dammasch State Hospital due to cannabis                                                                                                                                                                                                                                                                                                   | Prevalence from 6.7% (1970) to 2.5% (1975); no statistical tests reported.                                                                                                                                                                                                                                                                                               | 8  |
| 14. | Boyle 2014    | United States<br>Cannabis decriminalization                         | Repeated cross-sectional study, 2011-2013                                                                    | Population-based;<br>Admin record data<br>N=11 incidents                                   | <i>Accidents, other:</i> explosions of gases related to hash oil manufacturing                                                                                                                                                                                                                                                                                                                              | Two events in 2 years prior, nine events in 7 months post-decriminalization (before legal sales); no statistical tests reported.                                                                                                                                                                                                                                         | A* |
| 15. | Bradford 2018 | United States<br>Legal regulation of cannabis for medical use (MCL) | Repeated cross-sectional study, 2010-2015                                                                    | Population-based;<br>Admin record data<br>N=132.6 million physician-drug-year observations | <i>Prescription drug use:</i> total number of daily opioid dose prescriptions filled (in millions)                                                                                                                                                                                                                                                                                                          | MCL associated with fewer daily doses filled in states with active dispensaries (-3.742 million, 95% CI: -6.289, -1.194) and in states with home cultivation (-1.792 million, 95% CI: -3.532, -0.052). Results also varied by type of opioid.                                                                                                                            | 18 |
| 16. | Bradford 2016 | United States<br>Legal regulation of cannabis for medical use (MCL) | Controlled before-and-after study, 2010-2013<br><br>[States without a medical marijuana law at a given time] | Population-based;<br>Admin record data<br>N= 588,808-2,496,608                             | <i>Prescription drug use:</i> among Medicaid Part D enrollees, average daily doses filled annually per physician for FDA-approved drugs treating conditions that cannabis may be used to treat (anxiety, depression, glaucoma, nausea, pain, psychosis, seizures, sleep disorders, spasticity)<br><br><i>Costs, health care:</i> estimated annual change in Medicaid Part D spending (program and enrollee) | MCL associated with statistically significant ( $p < 0.05$ ) reductions in daily doses filled for 7 of 9 conditions (difference-in-difference coefficients from -265 daily doses for depression to -1826 for pain), no significant effects for glaucoma or spasticity.<br><br>Estimated prescription drug cost savings from 2010-2013 attributed to MCL = \$515,194,125. | 17 |

|     |                     |                                                                     |                                                                                             |                                                                                        |                                                                                                                                                                                                                                                                                                                                                                                                                                                                                                                                                                                                                                                                                                                                          |                                                                                                                                                                                                                                                                                                                                                                                                                                                                                                                                           |    |
|-----|---------------------|---------------------------------------------------------------------|---------------------------------------------------------------------------------------------|----------------------------------------------------------------------------------------|------------------------------------------------------------------------------------------------------------------------------------------------------------------------------------------------------------------------------------------------------------------------------------------------------------------------------------------------------------------------------------------------------------------------------------------------------------------------------------------------------------------------------------------------------------------------------------------------------------------------------------------------------------------------------------------------------------------------------------------|-------------------------------------------------------------------------------------------------------------------------------------------------------------------------------------------------------------------------------------------------------------------------------------------------------------------------------------------------------------------------------------------------------------------------------------------------------------------------------------------------------------------------------------------|----|
| 17. | Bradford 2017       | United States<br>Legal regulation of cannabis for medical use (MCL) | Controlled before-and-after study, 2007-2014<br><br>[States without MCL in a given quarter] | Population-based;<br>Admin record data                                                 | <i>Prescription drug use:</i> average number of daily prescription drug doses dispensed per fee-for-service Medicaid beneficiary for FDA-approved drugs treating conditions that cannabis may be used to treat.<br><br><i>Costs, health care:</i> estimated annual change in Medicaid fee-for-service spending on prescription drugs with medical cannabis indications                                                                                                                                                                                                                                                                                                                                                                   | MCL associated with statistically significant ( $p<0.05$ ) reductions in daily doses per beneficiary for 5 of 9 conditions (depression, nausea, pain, psychosis, and seizures). Estimated proportion reductions in dispensed doses ranged from 11% for pain to 17% for nausea.<br><br>Estimated Medicaid fee-for-service prescription drug cost savings from 2007-2014 attributed to MCL = 2,694.1 million                                                                                                                                | 17 |
| 18. | Brooks-Russell 2019 | United States<br>Legal regulation of cannabis for recreational use  | Repeated cross-sectional study, 2013-2015                                                   | Population-based;<br>School-based survey<br><br>N = 26,019 (2013)<br>N = 15,970 (2015) | <i>Prevalence of use, decriminalized/regulated drug(s):</i> lifetime use; past 30-day use.<br><br><i>Prevalence of use, other drugs or alcohol:</i> past 30-day use of cigarettes; past 30-day use alcohol; lifetime non-medical prescription drug use; lifetime cocaine use.<br><br><i>Perceived harmfulness of decriminalized/regulated drug(s):</i> high vs. low perceived accessibility, wrongfulness, parental disapproval, and harmfulness.<br><br><i>Frequency of use, decriminalized/legalized drug(s):</i> >20 occasions of use in past 30 days, among those who reported past 30-day use.<br><br><i>Prevalence of use, decriminalized/regulated drug(s):</i> use on school property, among those who reported past 30-day use. | No significant change in lifetime or past 30-day use following legal regulation.<br><br>Decrease in past 30-day cigarette use from 2013 to 2015 (12.1 to 8.6%, $p<0.01$ ). No significant changes in other drug or alcohol use.<br><br>Decrease in high perceived harmfulness (52.9% to 47.7%, $p<0.01$ ). No significant changes in other perceptions.<br><br>Decrease in frequent use among past-30-day users (33.2% to 26.8%, $p<0.01$ ).<br><br>Decrease in use on school property among past-30-day users (5.7% to 4.4%, $p=0.03$ ). | 15 |

|     |                 |                                                                          |                                                                          |                                                             |                                                                                                   |                                                                                                                                                                                                                                                                                                                                                           |     |
|-----|-----------------|--------------------------------------------------------------------------|--------------------------------------------------------------------------|-------------------------------------------------------------|---------------------------------------------------------------------------------------------------|-----------------------------------------------------------------------------------------------------------------------------------------------------------------------------------------------------------------------------------------------------------------------------------------------------------------------------------------------------------|-----|
| 19. | Calcaterra 2018 | United States<br>Legal regulation of cannabis for recreational use (RCL) | Interrupted time series study, 2009-2015                                 | Population-based;<br>Admin record data<br><br>N=370,612     | <i>Health services utilization: cannabis-related hospitalizations</i>                             | RCL associated with an increase in hospitalizations: adjusted annual rates of inpatient and emergent hospitalizations were 2.4 and 4.3 times higher in 2015 as compared to 2009 (p<0.001). A reduced segmented regression model shows a significant increase in slope post-RCL (b= 1.835, SE=0.218, p< 0.0001).                                           | A * |
| 20. | Cassidy 2015    | United States<br>Legal regulation of cannabis for recreational use       | Uncontrolled before-and-after study, 2008-2014                           | Convenience sampling<br><br>N=13,945                        | <i>Prevalence of use, decriminalized/regulated drug(s): among substance use treatment clients</i> | Increase from 21.3% in 2008 to 32.8% in 2014 (p<0.001).                                                                                                                                                                                                                                                                                                   | A * |
|     |                 |                                                                          |                                                                          |                                                             | <i>Prevalence of use, decriminalized/regulated drug(s): past-year initiation</i>                  | No significant change in past-year initiation.                                                                                                                                                                                                                                                                                                            |     |
| 21. | Cerde 2018      | United States<br>Legal regulation of cannabis for medical use (MCL)      | Controlled before-and-after study, 1991-2015<br><br>[States without MCL] | Population-based;<br>School-based survey<br><br>N=1,179,372 | <i>Prevalence of use, decriminalized/regulated drug(s): past 30-day use</i>                       | Decrease in 8 <sup>th</sup> grade (aOR=0.72; 95% CI: 0.62, 0.84). No significant changes in 10 <sup>th</sup> or 12 <sup>th</sup> .                                                                                                                                                                                                                        | 18  |
|     |                 |                                                                          |                                                                          |                                                             | <i>Prevalence of use, other drugs or alcohol: binge drinking in past two weeks</i>                | Decrease in 8 <sup>th</sup> grade (aOR=0.72; 95% CI: 0.65, 0.79). No significant changes in 10 <sup>th</sup> or 12 <sup>th</sup> .                                                                                                                                                                                                                        |     |
|     |                 |                                                                          |                                                                          |                                                             | <i>Prevalence of use, other drugs or alcohol: past 30-day cigarette use</i>                       | Decrease in 8 <sup>th</sup> grade (aOR=0.74; 95% CI: 0.66, 0.82) and increase in 12 <sup>th</sup> grade (aOR=1.17; 95% CI: 1.06, 1.29).                                                                                                                                                                                                                   |     |
|     |                 |                                                                          |                                                                          |                                                             | <i>Prevalence of use, other drugs or alcohol: past 30-day non-medical prescription drug use</i>   | Decrease in non-medical prescription opioid use in 8 <sup>th</sup> grade (aOR=0.43; 95% CI: 0.36, 0.52) and increase in 12 <sup>th</sup> grade (aOR=1.42; 95% CI: 1.21, 1.66).<br>Decrease in prescription amphetamine use (aOR=0.71; 95% CI: 0.63, 0.81) and prescription tranquilizer use (aOR=0.83; 95% CI: 0.71, 0.98) in 8 <sup>th</sup> grade only. |     |
|     |                 |                                                                          |                                                                          |                                                             | <i>Prevalence of use, other drugs or alcohol: past 30-day non-cannabis illicit drug use</i>       | Decrease in 8 <sup>th</sup> grade only (aOR=0.77; 95% CI: 0.69, 0.86).                                                                                                                                                                                                                                                                                    |     |

|     |              |                                                                              |                                                                                                            |                                                                |                                                                                                                                                                                                                                                                                                                                                         |                                                                                                                                                                                                                                                                                                                                                                                                                                                       |    |
|-----|--------------|------------------------------------------------------------------------------|------------------------------------------------------------------------------------------------------------|----------------------------------------------------------------|---------------------------------------------------------------------------------------------------------------------------------------------------------------------------------------------------------------------------------------------------------------------------------------------------------------------------------------------------------|-------------------------------------------------------------------------------------------------------------------------------------------------------------------------------------------------------------------------------------------------------------------------------------------------------------------------------------------------------------------------------------------------------------------------------------------------------|----|
| 22. | Cerda 2017   | United States<br><br>Legal regulation of cannabis for recreational use (RCL) | Controlled before-and-after study, 2010-2015                                                               | Population-based; School-based survey<br><br>N=253,902         | <i>Prevalence of use, decriminalized/regulated drug(s):</i> past 30-day use<br><br><i>Perceived harmfulness of decriminalized/regulated drug(s):</i> great or moderate vs. low or no risk                                                                                                                                                               | Increase in 8 <sup>th</sup> and 10 <sup>th</sup> grade in Washington but not Colorado (difference-in-difference WA vs. non-RCL= 3.2% in 8 <sup>th</sup> grade, p=0.03; 5.0% in 10 <sup>th</sup> , p=0.01).<br><br>Decreased perceived harmfulness in 8 <sup>th</sup> and 10 <sup>th</sup> grade in Washington but not Colorado (difference-in-difference WA vs. non-RCL= -9.3% in 8 <sup>th</sup> grade, p=0.01; -9.0% in 10 <sup>th</sup> , p=0.02). | 18 |
| 23. | Cerveny 2017 | Czech Republic<br><br>Cannabis decriminalization                             | Repeated cross-sectional study, 2008; 2012                                                                 | Population-based; Household survey<br>N=1524                   | <i>Age of first use, decriminalized/regulated drug</i>                                                                                                                                                                                                                                                                                                  | No significant effect of decriminalization on hazard of initiation.                                                                                                                                                                                                                                                                                                                                                                                   | 13 |
| 24. | Choo 2014    | United States<br><br>Legal regulation of cannabis for medical use (MCL)      | Controlled before-and-after study, 1991-2011<br><br>[Matched to state in geographic proximity without MCL] | Population-based; School-based survey<br><br>N=11,703,100      | <i>Prevalence of use, decriminalized/regulated drug(s):</i> past 30-day use                                                                                                                                                                                                                                                                             | No significant effect of MCL.                                                                                                                                                                                                                                                                                                                                                                                                                         | 16 |
| 25. | Chu 2014     | United States<br><br>Legal regulation of cannabis for medical use (MCL)      | Controlled before-and-after study, 1988-2008<br><br>[Non-MCL state years]                                  | Population-based; Admin record data<br><br>N=12,157 city-years | <i>Criminal justice involvement:</i> adult male cannabis possession arrest rates<br><br><i>Criminal justice involvement:</i> ratio of cannabis possession arrests to all arrests among adult males<br><br><i>Addiction treatment utilization:</i> ratio of cannabis-related to all treatment admissions among adult male non-criminal justice referrals | No significant effect of MCL.<br><br>MCL associated with 9.3-12.1% increase in ratio of cannabis to non-cannabis arrests.<br><br>MCL associated with 9.1-10.5% increase in ratio of cannabis to non-cannabis admissions.                                                                                                                                                                                                                              | 15 |

|     |               |                                                                     |                                                              |                                                                   |                                                                                                                                                                                                                |                                                                                                                                                                                    |    |
|-----|---------------|---------------------------------------------------------------------|--------------------------------------------------------------|-------------------------------------------------------------------|----------------------------------------------------------------------------------------------------------------------------------------------------------------------------------------------------------------|------------------------------------------------------------------------------------------------------------------------------------------------------------------------------------|----|
| 26. | Couper 2014   | United States<br>Cannabis decriminalization                         | Repeated cross-sectional study, 2009-2013                    | Convenience sampling<br>N=25,719                                  | <i>Driving under the influence or with detectable concentration, decriminalized/regulated drug(s):</i> prevalence of THC in blood toxicology results from suspected impaired driving cases in Washington State | Increased prevalence of active THC after decriminalization (24.9% vs. 19.1%, $p<0.05$ ).                                                                                           | 9  |
| 27. | Donnelly 1995 | Australia<br>Cannabis decriminalization                             | Repeated cross-sectional study, 1985-1993                    | Population-based;<br>Household survey<br><br>N= 2257 to 3500      | <i>Prevalence of use, decriminalized/regulated drug(s):</i> lifetime cannabis use                                                                                                                              | No significant interaction between survey year and state: lifetime use did not increase at a significantly greater rate in South Australia (decriminalized).                       | 15 |
|     |               |                                                                     |                                                              |                                                                   | <i>Perceived availability of decriminalized/regulated drug(s):</i> been offered cannabis                                                                                                                       | No significant interaction between survey year and state.                                                                                                                          |    |
|     |               |                                                                     |                                                              |                                                                   | <i>Attitudes towards use, decriminalized/regulated drug(s):</i> would take cannabis if offered by a trusted friend                                                                                             | Proportion reporting willingness to try increased from 10% in 1985 to 18% in 1991 in South Australia, significant positive interaction between survey year and state ( $p<0.05$ ). |    |
|     |               |                                                                     |                                                              |                                                                   | <i>Prevalence of use, decriminalized/regulated drug(s):</i> weekly use of cannabis                                                                                                                             | No significant interaction between survey year and state.                                                                                                                          |    |
| 28. | Donnelly 2000 | Australia<br>Cannabis decriminalization                             | Repeated cross-sectional study, 1985; 1988; 1991; 1993; 1995 | Population-based;<br>Household survey                             | <i>Prevalence of use, decriminalized/regulated drug(s):</i> lifetime use                                                                                                                                       | Greater increase in lifetime use in South Australia (decriminalized) than the rest of Australia (test for trend, $p<0.05$ ).                                                       | 11 |
|     |               |                                                                     |                                                              |                                                                   | <i>Prevalence of use, decriminalized/regulated drug(s):</i> weekly use                                                                                                                                         | Rate of change for South Australia not significantly different from rest of the country.                                                                                           |    |
| 29. | Dutra 2018    | United States<br>Legal regulation of cannabis for medical use (MCL) | Repeated cross-sectional study, 2008-2015                    | Population-based;<br>Household survey<br><br>N= 91,123 to 10,1973 | <i>Mental health conditions, suicide, or self-harm:</i> state prevalence of serious mental illness                                                                                                             | Liberal MCL associated with 0.2% increase in state prevalence of mental illness ( $b=0.002$ , $SE=0.001$ , $p=0.015$ ). No significant effect of restrictive MCL.                  | 17 |

|     |                |                                                                          |                                                                              |                                     |                                                                                                                                                                                                                                                                                                                                                                                           |                                                                                                                                                                                                                                                           |    |
|-----|----------------|--------------------------------------------------------------------------|------------------------------------------------------------------------------|-------------------------------------|-------------------------------------------------------------------------------------------------------------------------------------------------------------------------------------------------------------------------------------------------------------------------------------------------------------------------------------------------------------------------------------------|-----------------------------------------------------------------------------------------------------------------------------------------------------------------------------------------------------------------------------------------------------------|----|
| 30. | Estoup 2016    | United States<br>Legal regulation of cannabis for recreational use (RCL) | Repeated cross-sectional study, 2010-2015                                    | Convenience sampling<br>N=262       | <i>Mental health conditions, suicide, or self-harm</i> : # of reported psychological, behavioral, relational consequences of cannabis use<br><i>Perceived harmfulness of decriminalized/regulated drug(s)</i> : # of cons of continued cannabis use endorsed in decisional balance matrix<br><i>Frequency of use, decriminalized/legalized drug(s)</i> : # of times used in past 3 months | RCL associated with increased negative consequences of use, mediated by increased perceived harmfulness ( <i>b</i> for indirect effect=3.73; 95% CI=0.33, 9.55).<br>RCL associated with increased perceived harmfulness.<br>No significant effect of RCL. | 11 |
| 31. | Feige 2008     | China<br>Legal regulation of opium                                       | Repeated cross-sectional study, 1801-1902                                    | Unspecified                         | <i>Actual availability of decriminalized/regulated drug(s)</i> : Quantity of opium exports (number of chests per capita)<br><i>Price of drugs</i> : Price of opium at the scales in India                                                                                                                                                                                                 | No significant effect of legal regulation.<br>No significant effect of legal regulation.                                                                                                                                                                  | 16 |
| 32. | Félix 2017     | Portugal<br>Decriminalization of all drugs                               | Controlled before-and-after study, 1990-2010<br>[13 EU countries and Norway] | Convenience sampling                | <i>Price of drugs</i> : price data from (1) EU country reports to the Commission on Narcotic Drugs and (2) the European Monitoring Center for Drugs and Drug Addiction                                                                                                                                                                                                                    | Drug prices increased in Portugal following decriminalization, but difference-in-difference and synthetic control analyses indicate no statistically significant change in slope of drug prices.                                                          | 14 |
| 33. | Gonçalves 2015 | Portugal<br>Decriminalization of all drugs                               | Repeated cross-sectional study, 1999-2010                                    | Population-based; Admin record data | <i>Costs, health care</i> : combined direct costs of (1) drug treatment, prevention and harm reduction and (2) hospital treatment for hepatitis and HIV                                                                                                                                                                                                                                   | 12% increase over first 5 years following decriminalization, 9% over first 11 years.                                                                                                                                                                      | 13 |

|     |             |                                                                         |                                          |                                    |                                                                                                                                                      |                                                                                                                                                                                                                                                                      |    |
|-----|-------------|-------------------------------------------------------------------------|------------------------------------------|------------------------------------|------------------------------------------------------------------------------------------------------------------------------------------------------|----------------------------------------------------------------------------------------------------------------------------------------------------------------------------------------------------------------------------------------------------------------------|----|
|     |             |                                                                         |                                          |                                    | <i>Costs, non-health care:</i> combined indirect costs of lost income and production due to (1) drug addiction treatment and (2) drug-related death. | 37% reduction over first 5 years following decriminalization, 29% over first 11 years.                                                                                                                                                                               |    |
|     |             |                                                                         |                                          |                                    | <i>Costs, non-health care:</i> combined direct costs of social rehabilitation and legal system costs related to drugs                                | 17% reduction over first 11 years.                                                                                                                                                                                                                                   |    |
|     |             |                                                                         |                                          |                                    | <i>Costs, non-health care:</i> indirect costs of lost income and production of individuals arrested for drug-related crimes                          | 5% reduction over first 5 years following decriminalization, 24% over first 11 years.                                                                                                                                                                                |    |
| 34. | Gorman 2007 | United States<br><br>Legal regulation of cannabis for medical use (MCL) | Interrupted time series study, 1994-2002 | Convenience sampling               | <i>Prevalence of use, decriminalized/regulated drug(s):</i> prevalence of positive cannabis urine screen among arrestees.                            | No significant effect of MCL on positive cannabis tests in CA or OR.                                                                                                                                                                                                 | 12 |
|     |             |                                                                         |                                          |                                    | <i>Health services utilization:</i> proportion of emergency department visits in which cannabis was mentioned in CA, WA, and CO DAWN sites           | No significant effect of MCL on ED visits mentioning cannabis.                                                                                                                                                                                                       |    |
| 35. | Grant 2018  | United States<br><br>Legal regulation of cannabis for medical use (MCL) | Cohort study, 1998-2012                  | Convenience sampling<br><br>N=1359 | <i>Prevalence of use, decriminalized/regulated drug(s):</i> use in last 30 days of substance use case management program                             | Participants exiting case management after MCL were more likely to report past 30-day use (AOR = 2.1, p < 0.0001).                                                                                                                                                   | 12 |
|     |             |                                                                         |                                          |                                    | <i>Prevalence of use, other drugs or alcohol:</i> # of days of use, in past 30 days, of alcohol or drugs                                             | Participants exiting case management after MCL used alcohol ( $b = 0.48$ , $SE=0.24$ , $p < 0.05$ ), illicit methadone ( $b = 0.67$ , $SE=0.22$ , $p < 0.005$ ), and other opioids ( $b = 0.52$ , $SE=0.15$ ), $p < 0.01$ ) more frequently than the pre-MCL cohort. |    |
| 36. | Grucza 2018 | United States                                                           | Controlled before-and-after study,       | Population-based;                  | <i>Criminal justice involvement:</i> arrest rates for cannabis                                                                                       | Arrest rates decreased by 75% among youth (95% CI: -0.89, -0.44) and 78% among adults (95% CI: -0.89, -0.52).                                                                                                                                                        | 18 |



|     |             |                                                                          |                                                                                                               |                                                             |                                                                                                                                                                                                                                                                                        |                                                                                                                                                                                                                    |    |
|-----|-------------|--------------------------------------------------------------------------|---------------------------------------------------------------------------------------------------------------|-------------------------------------------------------------|----------------------------------------------------------------------------------------------------------------------------------------------------------------------------------------------------------------------------------------------------------------------------------------|--------------------------------------------------------------------------------------------------------------------------------------------------------------------------------------------------------------------|----|
|     |             | Cannabis decriminalization                                               | 2007-2015<br>[States without decriminalization, legal regulation, or change in penalties related to cannabis] | School-based survey<br>N= 622,848                           | possession among minors (18 or under) and adults<br><i>Prevalence of use, decriminalized/regulated drug(s): past 30-day use</i><br><i>Frequency of use, decriminalized/regulated drug(s): frequency of past 30-day use</i>                                                             | Decriminalization was not significantly associated with use.<br>Decriminalization was not significantly associated with frequency of use.                                                                          |    |
| 37. | Grucza 2015 | United States<br>Legal regulation of cannabis for medical use (MCL)      | Controlled before-and-after study, 1990-2010<br>[States without MCL]                                          | Population-based; Admin record data<br>N=662,993            | <i>Mental health conditions, suicide, or self-harm: suicide deaths</i>                                                                                                                                                                                                                 | MCL not significantly associated with suicide rate overall, or when stratified by sex.                                                                                                                             | 16 |
| 38. | Harper 2012 | United States<br>Legal regulation of cannabis for medical use (MCL)      | Controlled before-and-after study, 2002-2009<br>[States without MCL]                                          | Population-based Household survey                           | <i>Prevalence of use, decriminalized/regulated drug(s): past-month use among adolescents</i><br><i>Perceived harmfulness of decriminalized/regulated drug(s): perceived riskiness of monthly use among adolescents</i>                                                                 | *Reanalysis of Wall 2011 (#106)<br>Difference-in-difference estimates indicate no significant effects of MCL, after accounting for state-level covariates and measurement error.<br>No significant effects of MCL. | 15 |
| 39. | Harpin 2018 | United States<br>Legal regulation of cannabis for recreational use (RCL) | Repeated cross-sectional study, 2013-2014                                                                     | Population-based; School-based survey<br>N=11,931 to 12,240 | <i>Prevalence of use, decriminalized/regulated drug(s): lifetime and past 30-day use</i><br><i>Mode of use, decriminalized/regulated drug(s): smoking vs. other modes, among past-month users</i><br><i>Perceived harmfulness of decriminalized/regulated drug(s): high versus low</i> | No significant change after RCL.<br>No significant change after RCL.<br>No significant change after RCL.                                                                                                           | 13 |

|     |            |                                                                              |                                                                                                               |                                                             |                                                                                                               |                                                                                                                                                                                                            |     |
|-----|------------|------------------------------------------------------------------------------|---------------------------------------------------------------------------------------------------------------|-------------------------------------------------------------|---------------------------------------------------------------------------------------------------------------|------------------------------------------------------------------------------------------------------------------------------------------------------------------------------------------------------------|-----|
|     |            |                                                                              |                                                                                                               |                                                             | perceived harmfulness and wrongfulness of use                                                                 |                                                                                                                                                                                                            |     |
|     |            |                                                                              |                                                                                                               |                                                             | <i>Perceived availability of decriminalized/regulated drug(s): high versus low perceived ease of access</i>   | Post-RCL year associated with high perceived access, (AOR= 1.21, 95% CI: 1.09, 1.34).                                                                                                                      |     |
| 40. | Hasin 2017 | United States<br><br>Legal regulation of cannabis for medical use (MCL)      | Controlled before-and-after study, 1991-1992; 2001-2001; 2012-2013<br><br>[late MCL states, never MCL states] | Population-based; Household survey<br><br>N=118,497         | <i>Prevalence of use, decriminalized/regulated drug(s): past-year use</i>                                     | MCL associated with greater increase in past-year use (difference-in-difference coefficient=1.4 percentage points, SE=0.5, p=0.004). Results varied by state and early vs. late MCL adoption.              | 17  |
|     |            |                                                                              |                                                                                                               |                                                             | <i>Substance use disorder or diagnosed dependence: DSM-IV Cannabis Use Disorder in past year</i>              | MCL associated with greater increase in CUD (difference-in-difference coefficient=0.7, SE=0.3, p=0.03).                                                                                                    |     |
| 41. | Hasin 2015 | United States<br><br>Legal regulation of cannabis for medical use (MCL)      | Repeated cross-sectional study, 1991-2014                                                                     | Population-based; School-based survey<br><br>N=1,098,270    | <i>Prevalence of use, decriminalized/regulated drug(s): past 30-day use</i>                                   | No significant effect of MCL overall, but interaction with grade: reduced use among 8 <sup>th</sup> graders post-MCL (AOR=0.73, 95% CI: 0.63, 0.84), but not 10 <sup>th</sup> or 12 <sup>th</sup> graders. | 18  |
| 42. | Hasin 2017 | United States<br><br>Legal regulation of cannabis for medical use (MCL)      | Repeated cross-sectional study, 1991-1992; 2001-2002; 2012-2013                                               | Population-based Household survey                           | <i>Driving under the influence or with detectable concentration, decriminalized/regulated drug(s)</i>         | Prevalence of cannabis-impaired driving increased more in states that passed MCL, but not significantly so (p=0.07).                                                                                       | A * |
|     |            |                                                                              |                                                                                                               |                                                             | <i>Driving under the influence or with detectable concentration, : driving under the influence of alcohol</i> | No significant effect of MCL.                                                                                                                                                                              |     |
| 43. | Hoyte 2015 | United States<br><br>Legal regulation of cannabis for recreational use (RCL) | Repeated cross-sectional study, 2007-2014                                                                     | Population-based; Admin record data<br><br>N= 42 fatalities | <i>Accidents, motor vehicle: THC-positive motor driver fatalities in Denver County, CO</i>                    | Fatalities increased from 0.28/month from July 1, 2007 to Dec 31, 2008 to 0.5/month from 2009-2012 to 0.56/month from Jan 1, 2013 to June 30, 2014 (post-RCL). No statistical tests reported.              | A * |

|     |              |                                                                          |                                                                                       |                                                       |                                                                                                                                  |                                                                                                                                                                                                                                                |    |
|-----|--------------|--------------------------------------------------------------------------|---------------------------------------------------------------------------------------|-------------------------------------------------------|----------------------------------------------------------------------------------------------------------------------------------|------------------------------------------------------------------------------------------------------------------------------------------------------------------------------------------------------------------------------------------------|----|
| 44. | Huber 2016   | United States<br>Legal regulation of cannabis for medical use (MCL)      | Repeated cross-sectional study, 1970-2012                                             | Population-based;<br>Admin record data                | <i>Crime (non-drug):</i> state violent crime rates (FBI Uniform Crime Reports)                                                   | MCL associated with 12.9% reduction in rate ( $b=-0.129$ , $SE= 0.036$ , $p<0.01$ ).                                                                                                                                                           | 14 |
|     |              |                                                                          |                                                                                       |                                                       | <i>Crime (non-drug):</i> state property crime rates                                                                              | MCL associated with 9.2% reduction in rate ( $b=-0.092$ , $SE= 0.032$ , $p<0.01$ ).                                                                                                                                                            |    |
| 45. | Hunt 2017    | United States<br>Legal regulation of cannabis for recreational use (RCL) | Controlled before-and-after study, 2013;2014<br>[WA and OR before RCL implementation] | Population-based;<br>Household survey<br><br>N=5576   | <i>Price of drugs:</i> consumer-reported price per gram                                                                          | No statistically significant effects of implementing legal retail cannabis sales in CO and WA on prices paid for recreational or medical purposes, 4-5 months later.                                                                           | 16 |
| 46. | Johnson 2017 | United States<br>Legal regulation of cannabis for medical use (MCL)      | Repeated cross-sectional study, 1991-2011                                             | Population-based;<br>School-based survey<br>N=715,014 | <i>Prevalence of use, decriminalized/regulated drug(s):</i> past 30-day use among adolescents                                    | MCL associated with decreased odds of past 30-day use (AOR=0.93, 95% CI: 0.86, 0.99). Policy details associated with lower (e.g., years since MCL and liberal provisions) and higher (e.g., voluntary vs. mandatory patient registration) use. | 17 |
|     |              |                                                                          |                                                                                       |                                                       | <i>Frequency of use, decriminalized/regulated drug(s):</i> past 30-day heavy use ( $\geq 20$ times)                              | MCL not associated with odds of heavy use (AOR=1.00, 95% CI: 0.89, 1.13).                                                                                                                                                                      |    |
| 47. | Jones 2015   | United States<br>Legal regulation of cannabis for recreational use (RCL) | Repeated cross-sectional study, 2012; 2014                                            | Unspecified                                           | <i>Prevalence of use, decriminalized/regulated drug(s):</i> THCA-positive meconium specimens from high-risk newborns in Colorado | RCL associated with increase in THCA-positive specimens (from 10.6% to 11.7%) and with increased mean THCA concentrations in positive specimens.                                                                                               | A* |
| 48. | Jones 2018   | United States<br>Legal regulation of cannabis for recreational use (RCL) | Repeated cross-sectional study, 2013-2015                                             | Convenience sampling<br><br>N=1413                    | <i>Frequency of use, decriminalized/regulated drug(s):</i> Categories from no use to daily use.                                  | No statistically significant difference in use frequency between pre- and post-RCL periods.                                                                                                                                                    | 10 |
|     |              |                                                                          |                                                                                       |                                                       | <i>Prevalence of use, other drugs or alcohol:</i> Frequency of cannabis use within alcohol use frequency groups                  | Strength of the relationship between alcohol and cannabis use decreased after RCL (from $r=0.54$ in Nov 2013 to 0.33 in Mar 2015).                                                                                                             |    |

|     |               |                                                                                            |                                           |                                                           |                                                                                                                                                   |                                                                                                                                                                                                                      |    |
|-----|---------------|--------------------------------------------------------------------------------------------|-------------------------------------------|-----------------------------------------------------------|---------------------------------------------------------------------------------------------------------------------------------------------------|----------------------------------------------------------------------------------------------------------------------------------------------------------------------------------------------------------------------|----|
| 49. | Kerr DCR 2017 | United States<br>Legal regulation of cannabis for recreational use (RCL)                   | Repeated cross-sectional study, 2012-2016 | Population-based;<br>School-based survey<br><br>N=10,924  | <i>Prevalence of use, decriminalized/regulated drug(s):</i> past 30-day use                                                                       | No significant association between RCL and past 30-day use overall (AOR=1.21, $p=0.48$ ) but increasing secular trend. RCL associated with increased cannabis use among heavy alcohol users (AOR=1.73, $p=0.0076$ ). | 17 |
|     |               |                                                                                            |                                           |                                                           | <i>Prevalence of use, other drugs or alcohol:</i> past 30-day cigarette use                                                                       | No significant association with RCL.                                                                                                                                                                                 |    |
|     |               |                                                                                            |                                           |                                                           | <i>Prevalence of use, other drugs or alcohol:</i> past 30-day heavy alcohol use                                                                   | No significant association with RCL.                                                                                                                                                                                 |    |
| 50. | Kerr WC 2018  | United States<br>Legal regulation of cannabis for medical (MCL) and recreational use (RCL) | Repeated cross-sectional study, 1984-2015 | Population-based;<br>Household survey<br><br>N=37,359     | <i>Prevalence of use, decriminalized/regulated drug(s):</i> past-year use                                                                         | No significant association between MCL (home growing or dispensaries) or RCL and past-year use, among both women and men.                                                                                            | 17 |
| 51. | Kerr DCR 2018 | United States<br>Legal regulation of cannabis for recreational use (RCL)                   | Repeated cross-sectional study, 2008-2016 | Population-based;<br>School-based survey<br><br>N=281,752 | <i>Prevalence of use, decriminalized/regulated drug(s):</i> past 30-day use                                                                       | RCL associated with increased past 30-day use among university students (AOR= 1.29, 95% CI: 1.13, 1.48).                                                                                                             | 17 |
|     |               |                                                                                            |                                           |                                                           | <i>Prevalence of use, other drugs or alcohol:</i> past 30-day tobacco use                                                                         | RCL associated with decreased tobacco use (AOR= 0.71, $p=0.0001$ ).                                                                                                                                                  |    |
|     |               |                                                                                            |                                           |                                                           | <i>Prevalence of use, other drugs or alcohol:</i> past 30-day alcohol use                                                                         | RCL not associated with alcohol use ( $p=0.59$ ).                                                                                                                                                                    |    |
|     |               |                                                                                            |                                           |                                                           | <i>Prevalence of use, other drugs or alcohol:</i> past 30-day illicit drug use (non-cannabis)                                                     | RCL not associated with illicit drug use ( $p=0.78$ ).                                                                                                                                                               |    |
| 52. | Keyes 2016    | United States<br>Legal regulation of cannabis for medical use (MCL)                        | Repeated cross-sectional study, 1991-2014 | Population-based;<br>School-based survey<br><br>N=973,089 | <i>Perceived harmfulness of decriminalized/regulated drug(s):</i> great or moderate vs. low perceived risk of physical harm due to occasional use | No significant association with MCL in all grades, 10 <sup>th</sup> or 12 <sup>th</sup> , but increased perceived harm in 8 <sup>th</sup> (AOR= 1.21, 95% CI: 1.08, 1.36).                                           | 15 |
|     |               |                                                                                            |                                           |                                                           | <i>Prevalence of use, decriminalized/regulated drug(s):</i> past 30-day use                                                                       | Adjusting for perceived harmfulness, significant negative association between                                                                                                                                        |    |

|     |                            |                                                                          |                                                      |                                                |                                                                                                                                                                                                                                    |                                                                                                                                                                                                                                                                                  |    |
|-----|----------------------------|--------------------------------------------------------------------------|------------------------------------------------------|------------------------------------------------|------------------------------------------------------------------------------------------------------------------------------------------------------------------------------------------------------------------------------------|----------------------------------------------------------------------------------------------------------------------------------------------------------------------------------------------------------------------------------------------------------------------------------|----|
|     |                            |                                                                          |                                                      |                                                |                                                                                                                                                                                                                                    | MCL and use in 8 <sup>th</sup> grade only (AOR= 0.81, 95% CI: 0.72, 0.92).                                                                                                                                                                                                       |    |
| 53. | Khatapoush 2004            | United States<br>Legal regulation of cannabis for medical use (MCL)      | Repeated cross-sectional study, 1995;1997;1999       | Population-based; Household survey<br>N=15,567 | <i>Prevalence of use, decriminalized/regulated drug(s):</i> past-month use<br><i>Perceived availability of decriminalized/regulated drug(s)</i><br><i>Prevalence of use, other drugs or alcohol:</i> past-year use of other drugs. | No statistically significant change over time in California (MCL state) or other states.<br>No statistically significant change over time in California (MCL state) or other states.<br>No statistically significant change over time in California (MCL state) or other states. | 10 |
| 54. | Kim, Anderson et al. 2015  | United States<br>Cannabis decriminalization                              | Repeated cross-sectional study, 2008-2009; 2010-2011 | Population-based; Admin record data<br>N=2574  | <i>Health services utilization:</i> emergency department visits for cyclic vomiting                                                                                                                                                | Decriminalization associated with increase in visits (prevalence ratio= 1.92, 95% CI: 1.33, 2.79).                                                                                                                                                                               | 15 |
| 55. | Kim, Hall, et al. 2016     | United States<br>Legal regulation of cannabis for recreational use (RCL) | Repeated cross-sectional study, 2012-2014            | Population-based; Admin record data            | <i>Health services utilization:</i> cannabis-related emergency department visits                                                                                                                                                   | RCL associated with increase in cannabis-related ED visits by Colorado residents (rate ratio; RR=1.46, $p>0.001$ ) and non-residents (RR=1.17, $p>0.001$ ).                                                                                                                      | 14 |
| 56. | Kim, Santaella et al. 2015 | United States<br>Legal regulation of cannabis for medical use (MCL)      | Repeated cross-sectional study, 1999-2011            | Population-based; Admin record data            | <i>Prescription drug use:</i> annual opioid sales in morphine-equivalent doses                                                                                                                                                     | Adjusting for increasing secular trend, MCL associated with 1% reduction in opioid sales per year of MCL ( $b=-0.01$ , $p=0.0016$ ).                                                                                                                                             | A* |
| 57. | Kim 2017                   | United States<br>Legal regulation of cannabis for medical use (MCL)      | Repeated cross-sectional study, 2004-2013            | Population-based; Household survey             | <i>Prevalence of use, other drugs or alcohol:</i> past-month nonmedical use of prescription opioids                                                                                                                                | No significant difference in prevalence post-MCL for youth, young adults, or adults 26+.                                                                                                                                                                                         | A* |

|     |                                     |                                                                          |                                           |                                                    |                                                                                                                                                                       |                                                                                                                                                             |    |
|-----|-------------------------------------|--------------------------------------------------------------------------|-------------------------------------------|----------------------------------------------------|-----------------------------------------------------------------------------------------------------------------------------------------------------------------------|-------------------------------------------------------------------------------------------------------------------------------------------------------------|----|
| 58. | Kim, Santaella-Tenorio, et al. 2016 | United States<br>Legal regulation of cannabis for medical use (MCL)      | Repeated cross-sectional study, 1999-2013 | Population-based;<br>Admin record data<br>N=68,394 | <i>Driving under the influence or with detectable concentration, other drugs or alcohol:</i> positive opioid tests among driver fatalities in motor vehicle accidents | MCL not significantly associated with opioid presence overall, but with reduction among decedents age 24-40 (AOR post-MCL vs. pre=0.50, 95% CI=0.37, 0.67). | 17 |
| 59. | Kosterman 2016                      | United States<br>Legal regulation of cannabis for recreational use (RCL) | Interrupted time series study, 1985-2014  | Convenience sampling<br>N=395                      | <i>Frequency of use, decriminalized/regulated drug(s):</i> past-month frequency among WA parents with any past-year use                                               | Frequency of use increased post-RCL (from 4-6 to 10 times/month, $p<0.05$ ).                                                                                | 8  |
|     |                                     |                                                                          |                                           |                                                    | <i>Substance use disorder or diagnosed dependence:</i> meets DSM-IV criteria for cannabis use disorder                                                                | No statistically significant change post-RCL.                                                                                                               |    |
|     |                                     |                                                                          |                                           |                                                    | <i>Perceived harmfulness of decriminalized/regulated drug(s):</i> approval and perceived harmfulness of cannabis use                                                  | Approval increased and perceived harmfulness decreased following RCL ( $p<0.05$ ).                                                                          |    |
| 60. | Larimer 2015                        | United States<br>Legal regulation of cannabis for recreational use (RCL) | Cohort study                              | Unspecified<br>N= 1095                             | <i>Frequency of use, decriminalized/regulated drug(s):</i> # of times used in past month among 12-17 year olds                                                        | No significant change associated with RCL.                                                                                                                  | A* |
|     |                                     |                                                                          |                                           |                                                    | <i>Perceived harmfulness of decriminalized/regulated drug(s):</i> perceived risk due to regular and occasional use                                                    | Perceived risk from regular use decreased among males but not females ( $p$ for interaction=0.017).                                                         |    |
|     |                                     |                                                                          |                                           |                                                    | <i>Perceived availability of decriminalized/regulated drug(s)</i>                                                                                                     | No significant change associated with RCL.                                                                                                                  |    |
|     |                                     |                                                                          |                                           |                                                    | <i>Prevalence of use, other drugs or alcohol:</i> number of drinks consumed per week.                                                                                 | RCL associated with increased number of drinks per week ( $p<0.01$ ), beyond time trends.                                                                   |    |
| 61. | Liang 2018                          | United States<br>Legal regulation of cannabis for                        | Repeated cross-sectional study, 1993-2014 | Population-based;<br>Admin record data             | <i>Prescription drug use:</i> # of filled opioid prescriptions, dosage of filled prescriptions in morphine-equivalent doses, and related Medicaid spending            | MCL not associated not associated with Schedule II opioid use.                                                                                              | 15 |



|     |                     |                                                                          |                                                |                                          |                                                                                                                                 |                                                                                                                                                 |     |
|-----|---------------------|--------------------------------------------------------------------------|------------------------------------------------|------------------------------------------|---------------------------------------------------------------------------------------------------------------------------------|-------------------------------------------------------------------------------------------------------------------------------------------------|-----|
|     |                     | medical use (MCL)                                                        |                                                |                                          | for Schedule II opioids (e.g., hydrocodone, oxycodone).                                                                         |                                                                                                                                                 |     |
|     |                     |                                                                          |                                                |                                          | <i>Prescription drug use:</i> as above, for Schedule III opioids (e.g. codeine).                                                | MCL associated with reductions in Schedule III opioid prescriptions (-29.6%, 95% CI: -2.4%, -56.7%), doses, and spending.                       |     |
| 62. | Livingston 2017     | United States<br>Legal regulation of cannabis for recreational use (RCL) | Interrupted time series study, 2000-2015       | Population-based;<br>Admin record data   | <i>Overdose or poisoning, other drugs:</i> deaths with ICD-10 code indicating opioid poisoning                                  | RCL associated with reduction in opioid poisoning deaths, adjusting for comparison state trends (-0.68 deaths per month, 95% CI: -1.35, -0.03). | 16  |
| 63. | Lo 2015             | United States<br>Legal regulation of cannabis for recreational use (RCL) | Uncontrolled before-and-after study, 2013-2015 | Convenience sampling<br>N= 2186          | <i>Prevalence of use, decriminalized/regulated drug(s):</i> positive cannabinoid screen among high-risk opioid therapy patients | RCL associated with increase in positive THC screens (30% of visits to 36%, $p=0.0003$ ).                                                       | A * |
|     |                     |                                                                          |                                                |                                          | <i>Opioid therapy compliance:</i> non-compliance (illicit opioids use or non-use of prescription)                               | RCL not associated with compliance.                                                                                                             |     |
| 64. | Lynne-Landsman 2013 | United States<br>Legal regulation of cannabis for medical use (MCL)      | Switching replications study, 2003-2011        | Population-based;<br>School-based survey | <i>Prevalence of use, decriminalized/regulated drug(s):</i> lifetime and past-month                                             | MCL not associated with use (1 of 20 planned comparisons significant, expected by chance alone).                                                | 15  |
|     |                     |                                                                          |                                                |                                          | <i>Frequency of use, decriminalized/legalized drug(s):</i> daily or weekly use among lifetime users                             | MCL not associated with frequency (1 of 20 planned comparisons significant, expected by chance alone).                                          |     |
| 65. | Martins 2016        | United States<br>Legal regulation of cannabis for medical use (MCL)      | Repeated cross-sectional study, 2004-2013      | Population-based;<br>Household survey    | <i>Prevalence of use, decriminalized/regulated drug(s):</i> past-month use                                                      | MCL associated with greater past-month use among adults 26+ (AOR=1.24, 95% CI: 1.16, 1.31), but not among ages 12-17 or 18-25.                  | 16  |
|     |                     |                                                                          |                                                |                                          | <i>Perceived availability of decriminalized/regulated drug(s):</i> fairly or very easy to obtain vs. other                      | MCL associated with greater availability among adults 26+ (AOR=1.11, 95% CI: 1.07, 1.15), but not among ages 12-17 or 18-25.                    |     |
| 66. | Mason 2016          | United States                                                            | Controlled before-and-after study,             | Convenience sampling                     | <i>Prevalence of use, decriminalized/regulated drug(s):</i> past 30-day use                                                     | Post-RCL subject group not significantly associated with use (AOR= 2.80, 95% CI: 0.94-8.34).                                                    | 13  |



|     |             |                                                                         |                                                        |                                                         |                                                                                                                                                                                                           |                                                                                                                                                                                                                                                                                              |    |
|-----|-------------|-------------------------------------------------------------------------|--------------------------------------------------------|---------------------------------------------------------|-----------------------------------------------------------------------------------------------------------------------------------------------------------------------------------------------------------|----------------------------------------------------------------------------------------------------------------------------------------------------------------------------------------------------------------------------------------------------------------------------------------------|----|
|     |             | Legal regulation of cannabis for recreational use (RCL)                 | 2010-2013<br>[students completed follow up before RCL] | N= 238                                                  | <i>Prevalence of use, other drugs or alcohol: use of cigarettes or alcohol vs. cannabis (indicating substitution effect)</i>                                                                              | Post-RCL subject group significantly less likely to use cigarettes or alcohol versus cannabis ( $p < 0.05$ ).                                                                                                                                                                                |    |
| 67. | Masten 2014 | United States<br><br>Legal regulation of cannabis for medical use (MCL) | Interrupted time series study, 1992-2009               | Population-based;<br>Admin record data<br><br>N=245,495 | <i>Driving under the influence or with detectable concentration, decriminalized/regulated drug(s): proportion of fatal-crash-involved drivers (decedents and survivors) who test cannabinoid-positive</i> | Significant policy effect found in 3 of 12 MCL states, with increases of 2.1-6.0 percentage points among all drivers and 4.6-9.6 among fatally injured drivers in CA, HI, and OR (adjusted for changes in testing and national trends). These were step increases rather than upward trends. | 14 |
| 68. | Mauro 2019  | United States<br><br>Legal regulation of cannabis for medical use (MCL) | Repeated cross-sectional study, 2004-2013              | Population-based;<br>Household survey                   | <i>Prevalence of use, decriminalized/regulated drug(s): past-month use</i>                                                                                                                                | No significant effect of MCL among men or women aged 12-17 or 18-25, but significant increases for ages 26+ among men (+1.7 percentage points, $p < 0.001$ ) and women (+ 1.1%, $p = 0.013$ ).                                                                                               | 16 |
|     |             |                                                                         |                                                        |                                                         | <i>Frequency of use, decriminalized/legalized drug(s): daily use among past-year users</i>                                                                                                                | Significant effect of MCL among men aged 18-25 (+ 2.4%, $p = 0.047$ ), and both men and women age 26+ (men + 2.8%, $p = 0.014$ ; women + 3.4 %, $p = 0.003$ ).                                                                                                                               |    |
|     |             |                                                                         |                                                        |                                                         | <i>Substance use disorder or diagnosed dependence: met DSM-IV criteria for cannabis use disorder</i>                                                                                                      | No statistically significant effect of MCL for any age-gender group.                                                                                                                                                                                                                         |    |
| 69. | Mauro 2017  | United States<br><br>Legal regulation of cannabis for medical use (MCL) | Repeated cross-sectional study, 2004-2013              | Population-based;<br>Household survey                   | <i>Prevalence of use, decriminalized/regulated drug(s): past-month use</i>                                                                                                                                | MCL associated with increased use among adults 26-39 [AOR=1.2, 95% CI: 1.1, 1.3], 40-64 [AOR=1.4, 95% CI: 1.2, 1.5], and 65+ [AOR=2.6, 95% CI: 1.5, 4.6].                                                                                                                                    | A* |
|     |             |                                                                         |                                                        |                                                         | <i>Perceived availability of decriminalized/regulated drug(s)</i>                                                                                                                                         | MCL associated with increased perceived accessibility of cannabis, which partially mediated association between MCL and use.                                                                                                                                                                 |    |

|     |             |                                                                     |                                           |                                                       |                                                                                                                                                              |                                                                                                                                                                                                                                                                                             |    |
|-----|-------------|---------------------------------------------------------------------|-------------------------------------------|-------------------------------------------------------|--------------------------------------------------------------------------------------------------------------------------------------------------------------|---------------------------------------------------------------------------------------------------------------------------------------------------------------------------------------------------------------------------------------------------------------------------------------------|----|
| 70. | Merker 2018 | United States<br>Legal regulation of cannabis for medical use (MCL) | Repeated cross-sectional study, 2012-2017 | Convenience sampling<br>N=302                         | <i>Prevalence of use, decriminalized/regulated drug(s):</i> current use among Inflammatory Bowel Disease patients                                            | Increase in use post-MCL (12.3% to 22.8% of patients, $p=0.0008$ ), but no significant increase in reported medical use.                                                                                                                                                                    | 12 |
| 71. | Miech 2015  | United States<br>Cannabis decriminalization                         | Repeated cross-sectional study, 2007-2013 | Population-based;<br>School-based survey<br>N=320,809 | <i>Prevalence of use, decriminalized/regulated drug(s):</i> lifetime, past-year, past 30-day use                                                             | [Decriminalization in CA in 2010]<br>8 <sup>th</sup> and 10 <sup>th</sup> grades: differences in use between CA residents and other states limited to select years, not sustained over time. 12 <sup>th</sup> grade: past-year use higher among CA residents vs. other states in 2010-2013. | 12 |
|     |             |                                                                     |                                           |                                                       | <i>Perceived harmfulness of decriminalized/regulated drug(s):</i> great vs. less-than-great perceived risk of regular use                                    | 8 <sup>th</sup> and 10 <sup>th</sup> grades: only one significant difference (8 <sup>th</sup> grade in 2012). 12 <sup>th</sup> grade: lower perceived risk among CA residents vs. other states in 2012-2013.                                                                                |    |
|     |             |                                                                     |                                           |                                                       | <i>Perceived availability of decriminalized/regulated drug(s):</i> easy vs. less-than-easy perceived access                                                  | 8 <sup>th</sup> and 10 <sup>th</sup> grades: only one significant difference (8 <sup>th</sup> grade in 2011). 12 <sup>th</sup> grade: higher perceived availability among CA residents vs. other states in 2012 only.                                                                       |    |
|     |             |                                                                     |                                           |                                                       | <i>Attitudes towards use, decriminalized/regulated drug(s):</i> strong disapproval of adult use vs. other                                                    | 8 <sup>th</sup> and 10 <sup>th</sup> grades: only one significant difference (8 <sup>th</sup> grade in 2012). 12 <sup>th</sup> grade: less strong disapproval among CA residents vs. other states in 2012-2013                                                                              |    |
|     |             |                                                                     |                                           |                                                       | <i>Attitudes towards use, decriminalized/regulated drug(s):</i> definitely or probably expect to use five years from present (only 12 <sup>th</sup> graders) | 12 <sup>th</sup> grade: greater expected use among CA residents vs. other states in 2012-2013.                                                                                                                                                                                              |    |
| 72. | Miller 2017 | United States<br>Legal regulation of cannabis for                   | Repeated cross-sectional study, 2005-2015 | Population-based;<br>School-based survey              | <i>Prevalence of use, decriminalized/regulated drug(s):</i> past 30-day use                                                                                  | RCL associated with increase of 2.0-3.5 percentage points (12-22%), adjusting for linear secular trend [passage of RCL, additional effect of legal store openings not statistically significant].                                                                                           | 16 |

|     |             |                                                                              |                                                                                         |                                                                 |                                                                                                                                               |                                                                                                                                                                     |    |
|-----|-------------|------------------------------------------------------------------------------|-----------------------------------------------------------------------------------------|-----------------------------------------------------------------|-----------------------------------------------------------------------------------------------------------------------------------------------|---------------------------------------------------------------------------------------------------------------------------------------------------------------------|----|
|     |             | recreational use (RCL)                                                       |                                                                                         | N=13,335                                                        | <i>Frequency of use, decriminalized/legalized drug(s):</i> past 30-day frequency                                                              | RCL associated with increase of 0.5 days per month, adjusting for linear secular trend [passage of RCL, additional effect of legal store openings not significant]. |    |
|     |             |                                                                              |                                                                                         |                                                                 | <i>Prevalence of use, other drugs or alcohol</i>                                                                                              | RCL passage not associated with changes. In 2015 (legal stores), decrease in tobacco and increase in other illegal drugs, but findings not robust.                  |    |
| 73. | Model 1993  | United States<br><br>Cannabis decriminalization                              | Controlled before-and-after study, 1975-1978<br><br>[States that did not decriminalize] | Population-based;<br>Admin record data                          | <i>Health services utilization:</i> non-cannabis drug mentions at ER visits                                                                   | Decriminalization associated with 12% fewer drug mentions at ER visits ( $b=-0.133$ , $SE=0.053$ , $p<0.01$ ), with stronger effects in initial years.              | 16 |
|     |             |                                                                              |                                                                                         |                                                                 | <i>Health services utilization:</i> cannabis drug mentions at ER visits                                                                       | Decriminalization associated with 64% more cannabis mentions ( $b=-0.642$ , $SE=0.112$ , $p<0.01$ ), with stronger effects in later years.                          |    |
| 74. | Morris 2014 | United States<br><br>Legal regulation of cannabis for medical use (MCL)      | Repeated cross-sectional study, 1990-2006                                               | Population-based;<br>Admin record data                          | <i>Crime (non-drug):</i> rates of violent crime (homicide, rape, robbery, assault)                                                            | MCL associated with 2.4% reduction in homicide rate ( $p<0.01$ ).                                                                                                   | 16 |
|     |             |                                                                              |                                                                                         |                                                                 | <i>Crime (non-drug):</i> rates of property crime (burglary, larceny, auto theft)                                                              | No significant association between MCL and property crimes.                                                                                                         |    |
| 75. | Nappe 2016  | United States<br><br>Legal regulation of cannabis for recreational use (RCL) | Repeated cross-sectional study. 2010-2015                                               | Population-based;<br>Admin record data<br><br>N=5231 exposures  | <i>Overdose or poisoning, decriminalized/regulated drug:</i> cannabis exposures reported to the National Poison Data System in Colorado       | RCL associated with increase in cannabis exposures (86 in 2011 to 231 in 2015).                                                                                     | A* |
| 76. | Onders 2016 | United States<br><br>Legal regulation of cannabis for medical use (MCL)      | Repeated cross-sectional study 2000-2013                                                | Population-based;<br>Admin record data<br><br>N= 1969 exposures | <i>Overdose or poisoning, decriminalized/regulated drug:</i> cannabis exposures among children <6 reported to the National Poison Data System | MCL associated with increased exposures (rate ratio for post vs. pre-MCL=2.25, 95% CI: 1.45, 3.51). Exposures peaked in the year following RCL.                     | 13 |

|     |               |                                                                                                    |                                                                                         |                                                                                  |                                                                                                                                                                                                                                                                                                                                 |                                                                                                                                                                                                                                                                                                                                                                                         |    |
|-----|---------------|----------------------------------------------------------------------------------------------------|-----------------------------------------------------------------------------------------|----------------------------------------------------------------------------------|---------------------------------------------------------------------------------------------------------------------------------------------------------------------------------------------------------------------------------------------------------------------------------------------------------------------------------|-----------------------------------------------------------------------------------------------------------------------------------------------------------------------------------------------------------------------------------------------------------------------------------------------------------------------------------------------------------------------------------------|----|
| 77. | Pacula 2010   | United States<br>Cannabis decriminalization and legal regulation of cannabis for medical use (MCL) | Repeated cross-sectional study, 1987-2003                                               | Convenience sampling                                                             | <i>Price of drugs</i> : price per gram paid at the last transaction among arrestees                                                                                                                                                                                                                                             | Decriminalization and MCL associated with higher prices (indicating increased demand).                                                                                                                                                                                                                                                                                                  | 13 |
| 78. | Pacula 2015   | United States<br>Legal regulation of cannabis for medical use (MCL)                                | Controlled before-and-after study, 1992-2011 and 1997-2011<br>[State-years without MML] | Population-based;<br>Admin record data<br>N=973<br>Household survey<br>N=112,926 | <i>Addiction treatment utilization</i> : number of treatment admissions with cannabis as primary indication<br><br><i>Prevalence of use, decriminalized/regulated drug(s)</i> : past 30-day use<br><br><i>Frequency of use, decriminalized/regulated drug(s)</i> : heavy use (>20 of last 30 days), # of days of use in past 30 | MCL associated with 14% reduction in cannabis admissions (difference-in-difference = -0.136, SE=0.067, $p < 0.05$ ). Larger effect size for non-criminal justice referrals. Partially offset by increase in admissions associated with dispensaries.<br><br>No overall significant association between MCL and use.<br><br>No significant association between MCL and frequency of use. | 15 |
| 79. | Parnes 2018   | United States<br>Legal regulation of cannabis for recreational use (RCL)                           | Repeated cross-sectional study, 2013-2015                                               | Convenience sampling<br>N=5241                                                   | <i>Prevalence of use, decriminalized/regulated drug(s)</i> : past 30-day use                                                                                                                                                                                                                                                    | No significant association between RCL and use among CO undergraduates.                                                                                                                                                                                                                                                                                                                 | 12 |
| 80. | Phillips 2017 | United States<br>Legal regulation of cannabis for medical use (MCL)                                | Repeated cross-sectional study, 2011-2014                                               | Population-based;<br>Admin record data<br>N=188,266                              | <i>Overdose or poisoning, other drugs</i> : state-level age-adjusted opioid-related mortality rate                                                                                                                                                                                                                              | MCL associated with 21.7% increase in opioid-related mortality ( $p < 0.0001$ ) but interacted with prescription drug monitoring programs such that rates decreased in states with both policies.                                                                                                                                                                                       | 15 |

|     |              |                                                                         |                                                                                                                        |                                                                                              |                                                                                                                                                                                                                                                                                                                                                                                                                                         |                                                                                                                                                                                                                                                                                                                                                                                                                                                                                                                                                                                                                                                                                                                                                                                        |    |
|-----|--------------|-------------------------------------------------------------------------|------------------------------------------------------------------------------------------------------------------------|----------------------------------------------------------------------------------------------|-----------------------------------------------------------------------------------------------------------------------------------------------------------------------------------------------------------------------------------------------------------------------------------------------------------------------------------------------------------------------------------------------------------------------------------------|----------------------------------------------------------------------------------------------------------------------------------------------------------------------------------------------------------------------------------------------------------------------------------------------------------------------------------------------------------------------------------------------------------------------------------------------------------------------------------------------------------------------------------------------------------------------------------------------------------------------------------------------------------------------------------------------------------------------------------------------------------------------------------------|----|
| 81. | Plunk 2016   | United States<br><br>Legal regulation of cannabis for medical use (MCL) | Repeated cross-sectional study, 2000-2014                                                                              | Population-based;<br>Household survey<br><br>N=5,483,715                                     | <p><i>Educational outcomes: high school non-completion</i></p> <p><i>Educational outcomes: college non-enrollment among high school graduates</i></p> <p><i>Educational outcomes: college non-completion among college entrants aged 25+</i></p> <p><i>Prevalence of use, decriminalized/regulated drug(s): past-month use</i></p> <p><i>Frequency of use, decriminalized/regulated drug(s): daily use (40 or more times/month)</i></p> | <p>High-school age exposure to MCL not associated with non-completion overall, but with increase in probability of failing to complete conditioned on completing the 12<sup>th</sup> grade (AOR=1.11, 95% CI: 1.05, 1.17).</p> <p>High-school age exposure to MCL associated with college non-enrollment (AOR = 1.09, 95% CI: 1.04, 1.14). Dose-response relationship with years of exposure.</p> <p>High-school age exposure to MCL associated with increase in probability of degree non-completion (AOR = 1.03, 95% CI: 1.01, 1.06).</p> <p>High-school age exposure to MCL not significantly associated with use.</p> <p>High-school age exposure to MCL not significantly associated with use overall, but among 12<sup>th</sup> graders only (AOR=1.62, 95% CI: 1.04, 2.54).</p> | 16 |
| 82. | Pollini 2015 | United States<br><br>Cannabis decriminalization                         | Repeated cross-sectional study<br><br>Roadside Survey, 2010; 2012<br><br>Fatality Analysis Reporting System, 2008-2012 | Population-based;<br>Admin record data<br><br>Roadside Survey, N=379-515<br><br>FARS, N=2860 | <p><i>Driving under the influence or with detectable concentration, decriminalized/regulated drug(s): proportion of drivers testing THC-positive in roadside survey</i></p> <p><i>Driving under the influence or with detectable concentration, decriminalized/regulated drug(s): presence of cannabinoids among fatally injured drivers</i></p>                                                                                        | <p>No statistically significant change in THC-positivity following decriminalization.</p> <p>Increase in cannabinoid prevalence in 2012 as compared to the pre-decriminalization period (AOR = 1.67, 95% CI: 1.28, 2.18).</p>                                                                                                                                                                                                                                                                                                                                                                                                                                                                                                                                                          | 13 |
| 83. | Powell 2018  | United States<br><br>Legal regulation of cannabis for                   | Repeated cross-sectional study, 1999-2013                                                                              | Population-based;<br>Admin record data                                                       | <i>Overdose or poisoning, other drugs: deaths related to prescription opioids and heroin</i>                                                                                                                                                                                                                                                                                                                                            | Existence of MCL not significantly associated with overdose mortality (only active dispensaries associated with reduction in deaths).                                                                                                                                                                                                                                                                                                                                                                                                                                                                                                                                                                                                                                                  | 15 |

|     |              |                                                                              |                                                                                               |                                                     |                                                                                                                                                          |                                                                                                                                                                          |    |
|-----|--------------|------------------------------------------------------------------------------|-----------------------------------------------------------------------------------------------|-----------------------------------------------------|----------------------------------------------------------------------------------------------------------------------------------------------------------|--------------------------------------------------------------------------------------------------------------------------------------------------------------------------|----|
|     |              | medical use (MCL)                                                            |                                                                                               |                                                     | <i>Addiction treatment utilization</i> : number of treatment episodes related to pain reliever misuse                                                    | Existence of MCL not significantly associated with overdose mortality (only active dispensaries associated with reduction).                                              |    |
|     |              |                                                                              |                                                                                               |                                                     | <i>Prevalence of use, other drugs or alcohol</i> : self-reported nonmedical use of pain relievers (National Survey on Drug Use and Health)               | No statistically significant association between MCL and use.                                                                                                            |    |
|     |              |                                                                              |                                                                                               |                                                     | <i>Prescription drug use</i> : morphine-equivalent doses of opioids distributed to legal medical markets                                                 | No statistically significant association between MCL and use over full time period.                                                                                      |    |
| 84. | Prue 2014    | United States<br><br>Peyote decriminalization                                | Repeated cross-sectional study, 1985-2010                                                     | Population-based; Household survey<br><br>N=886,088 | <i>Prevalence of use, decriminalized/regulated drug(s)</i> : peyote use                                                                                  | Use among American Indians increased from 1% in 1994 (year of American Indian Religious Freedom Act) to 10% in 1999. Use among non-American Indians remained steady <2%. | 7  |
|     |              |                                                                              |                                                                                               |                                                     | <i>Age of first use, decriminalized/regulated drug</i> : age at first use of peyote                                                                      | No significant change in age at first use among American Indians or non-American Indians following decriminalization.                                                    |    |
| 85. | Ramirez 2017 | United States<br><br>Legal regulation of cannabis for recreational use (RCL) | Repeated cross-sectional study, 2014;2015                                                     | Unspecified<br><br>N=2400                           | <i>Driving under the influence or with detectable concentration, decriminalized/regulated drug(s)</i> : daytime prevalence of cannabis-positive drivers  | Statistically significant increase post-RCL (7.8% to 18.9% after one year).                                                                                              | A* |
| 86. | Reith 2015   | International<br><br>Cannabis decriminalization                              | Controlled before-and-after study, 1980-2012<br><br>[Country-years without decriminalization] | Unspecified<br><br>N=102 countries                  | <i>Actual availability of decriminalized/regulated drug(s)</i> : kg of cannabis seized and number of plants eradicated divided by population in millions | Decriminalization associated with increased plant eradication ( $p<0.05$ ), but not seizures.                                                                            | 10 |

|     |                |                                                                          |                                                                           |                                                              |                                                                                                                                                                                                                                              |                                                                                                                                                     |     |
|-----|----------------|--------------------------------------------------------------------------|---------------------------------------------------------------------------|--------------------------------------------------------------|----------------------------------------------------------------------------------------------------------------------------------------------------------------------------------------------------------------------------------------------|-----------------------------------------------------------------------------------------------------------------------------------------------------|-----|
| 87. | Rodriguez 2016 | United States<br>Legal regulation of cannabis for recreational use (RCL) | Cohort study, 2009-2015                                                   | Convenience sampling<br>N= 1698                              | <i>Prevalence of use, decriminalized/regulated drug(s):</i> positive urine toxicology among pregnant young women<br><br><i>Disclosure of use, decriminalized/regulated drug(s):</i> agreement between self-reported use and urine toxicology | Increased cannabis-positive screens post-RCL (16.2 to 20.2%, $p=0.048$ ).<br><br>Improved agreement post-RCL (kappa = 0.504 vs. 0.191).             | A * |
| 88. | Rohda 2017     | United States<br>Legal regulation of cannabis for recreational use (RCL) | Repeated cross-sectional study, 2011-2016                                 | Population-based;<br>Admin record data<br>N=29,044 exposures | <i>Overdose or poisoning, other drugs:</i> synthetic cannabinoid receptor agonist (SCRA) exposures reported to poison control centers                                                                                                        | SCRA exposures declined in WA (175 to 28, $p=0.017$ ) and OR (39 to 14, $p=0.012$ ) following RCL, but not in all RCL states combined ( $p=0.41$ ). | A * |
| 89. | Rusby 2018     | United States<br>Legal regulation of cannabis for recreational use (RCL) | Cohort study, 2014-2016                                                   | Population-based;<br>School-based survey<br>N=444            | <i>Prevalence of use, decriminalized/regulated drug(s):</i> past 30-day use                                                                                                                                                                  | RCL not significantly associated with use.                                                                                                          | 12  |
|     |                |                                                                          |                                                                           |                                                              | <i>Frequency of use, decriminalized/regulated drug(s):</i> number of days use in past 30                                                                                                                                                     | RCL associated with greater number of days of use (ARR=1.26, 95% CI: 1.10, 1.45).                                                                   |     |
|     |                |                                                                          |                                                                           |                                                              | <i>Attitudes towards use, decriminalized/regulated drug(s):</i> willingness and intention to use (any vs. none)                                                                                                                              | RCL not significantly associated with willingness or intention to use.                                                                              |     |
| 90. | Sabia 2017     | United States<br>Legal regulation of cannabis for medical use (MCL)      | Controlled before-and-after study. 1990-2012<br>[State-years without MML] | Population-based;<br>Household survey<br>N=5,428,399         | <i>BMI</i>                                                                                                                                                                                                                                   | MCL associated with reduction in BMI (adjusted difference-in-differences for contemporaneous effect = -0.084, SE=0.034, $p<0.05$ ).                 | 16  |



|     |                        |                                                                     |                                                                               |                                                                  |                                                                                                                                  |                                                                                                                                                                                                       |    |
|-----|------------------------|---------------------------------------------------------------------|-------------------------------------------------------------------------------|------------------------------------------------------------------|----------------------------------------------------------------------------------------------------------------------------------|-------------------------------------------------------------------------------------------------------------------------------------------------------------------------------------------------------|----|
| 91. | Santaella-Tenorio 2017 | United States<br>Legal regulation of cannabis for medical use (MCL) | Repeated cross-sectional study, 1985-2014                                     | Population-based;<br>Admin record data<br><br>N=1,220,610 deaths | <i>Accidents, motor vehicle</i> : age-adjusted traffic fatality rates (all road users)                                           | MCL associated with 10.8% reduction in traffic fatality rates (95% CI = 9.0%, 12.5%).                                                                                                                 | 17 |
| 92. | Schmidt 2016           | United States<br>Legal regulation of cannabis for medical use (MCL) | Repeated cross-sectional study, 2014-2013                                     | Population-based;<br>Household survey<br><br>N=450,300           | <i>Perceived harmfulness of decriminalized/regulated drug(s)</i> : belief that weekly/monthly use is “not a great risk”          | Living in MCL state not associated with perceived harmfulness. (Secular trend towards greater permissiveness for all outcomes, but no significant effects MCL after control for state fixed effects). | 17 |
|     |                        |                                                                     |                                                                               |                                                                  | <i>Attitudes towards use, decriminalized/regulated drug(s)</i> : belief that parents/friends don't disapprove of trying cannabis | Living in MCL state not associated with perceived attitudes.                                                                                                                                          |    |
|     |                        |                                                                     |                                                                               |                                                                  | <i>Perceived availability of decriminalized/regulated drug(s)</i> : belief that cannabis is fairly or very easy to obtain        | Living in MCL state not associated with perceived availability.                                                                                                                                       |    |
| 93. | Sevigny 2014           | United States<br>Legal regulation of cannabis for medical use (MCL) | Controlled before-and-after study, 1990-2010<br><br>[State-years without MCL] | Convenience sampling<br><br>N=39,157                             | <i>Potency of decriminalized/regulated drug(s)</i> : concentration of THC in cannabis seized by law enforcement                  | MCL not significantly associated with potency (adjusted difference in %THC=0.53, $p>0.05$ ), but legal dispensaries associated with higher potency.                                                   | 16 |
| 94. | Shah 2018              | United States<br>Legal regulation of cannabis for medical use (MCL) | Repeated cross-sectional study, 2006-2014                                     | Population-based;<br>Admin record data                           | <i>Prescription drug use</i> : opioid use among commercially insured population.                                                 | MCL associated with lower odds of any opioid use (AOR=0.95, 95% CI: 0.94, 0.96), chronic opioid use (AOR=0.93, 95% CI: 0.91, 0.95) and high-risk opioid use (AOR=0.98, 95% CI: 0.96, 0.99).           | A* |
| 95. | Shepard 2016           | United States<br>Legal regulation of cannabis for                   | Repeated cross-sectional study, 1997-2009                                     | Population-based;<br>Admin record data                           | <i>Crime (non-drug)</i> : property crime (burglary, larceny, and vehicle theft arrests per 1000 residents)                       | MCL not associated with property crime.                                                                                                                                                               | 12 |

|     |                  |                                                                              |                                                       |                                                                       |                                                                                                                                                                                                                   |                                                                                                                                                                                                              |    |
|-----|------------------|------------------------------------------------------------------------------|-------------------------------------------------------|-----------------------------------------------------------------------|-------------------------------------------------------------------------------------------------------------------------------------------------------------------------------------------------------------------|--------------------------------------------------------------------------------------------------------------------------------------------------------------------------------------------------------------|----|
|     |                  | medical use (MCL)                                                            |                                                       |                                                                       | <i>Crime (non-drug):</i> violent crime (assault, homicide, rape, and robbery arrests)                                                                                                                             | MCL associated with reduction in violent crimes (-0.254 crimes per 1000 residents, SE=0.089, $p<0.05$ ).                                                                                                     |    |
| 96. | Shi 2017         | United States<br><br>Legal regulation of cannabis for medical use (MCL)      | Repeated cross-sectional study, 1997-2014             | Population-based;<br>Admin record data<br><br>N= 0.4M to 2.2M records | <i>Health services utilization:</i> annual hospitalization rate for cannabis dependence or abuse (ICD-9)<br><br><i>Overdose or poisoning, other drugs:</i> hospitalization rate for opioid pain reliever overdose | MCL not significantly associated with hospitalizations.<br><br>MCL associated with reduction in hospitalizations related to opioid overdose (adjusted prevalence difference = -0.13, 95% CI: -0.25, -0.018). | 16 |
|     |                  |                                                                              |                                                       |                                                                       | <i>Health services utilization:</i> hospitalization rate for opioid dependence or abuse                                                                                                                           | MCL associated with reduction in hospitalizations related to opioid dependence (adjusted prevalence difference = -0.23, 95% CI: -0.41, -0.068).                                                              |    |
| 97. | Sokoya 2018      | United States<br><br>Legal regulation of cannabis for recreational use (RCL) | Repeated cross-sectional study, 2012-2015             | Convenience sampling<br><br>N=2164                                    | <i>Accidents, other:</i> types of bony facial trauma among patients presenting to two CO hospitals                                                                                                                | RCL not associated with significant difference in mechanisms of facial fracture.                                                                                                                             | 12 |
| 98. | Steinemann 2018  | United States<br><br>Legal regulation of cannabis for medical use (MCL)      | Repeated cross-sectional study, 1993-2000; 2001-2015  | Population-based;<br>Admin record data<br><br>N=1578                  | <i>Driving under the influence or with detectable concentration, decriminalized/regulated drug(s):</i> proportion of fatally injured drivers who were cannabis-positive in HI                                     | MCL associated with increase in THC positivity (5.5% in 1993-2000; 16.3% in 2011-2015, $p<0.001$ ).                                                                                                          | 12 |
|     |                  |                                                                              |                                                       |                                                                       | <i>Driving under the influence or with detectable concentration, other drugs or alcohol:</i> proportion of fatally injured drivers who were methamphetamine- or alcohol-positive                                  | MCL not associated with significant difference in positivity rates.                                                                                                                                          |    |
| 99. | Stolzenberg 2016 | United States<br><br>Legal regulation of cannabis for                        | Repeated cross-sectional study, 2002-2003; 2004-2005; | Population-based;<br>School-based survey                              | <i>Prevalence of use, decriminalized/regulated drug(s):</i> past-month use among adolescents                                                                                                                      | Living in MCL state associated with greater use (adjusted coefficient=0.861, SE=0.298, $p<0.01$ ).                                                                                                           | 14 |

|      |             |                                                                              |                                                                               |                                                     |                                                                                                                                                                           |                                                                                                                                                                                   |    |
|------|-------------|------------------------------------------------------------------------------|-------------------------------------------------------------------------------|-----------------------------------------------------|---------------------------------------------------------------------------------------------------------------------------------------------------------------------------|-----------------------------------------------------------------------------------------------------------------------------------------------------------------------------------|----|
|      |             | medical use (MCL)                                                            | 2006-2007; 2008-2009; 2010-2011                                               |                                                     | <i>Prevalence of use, other drugs or alcohol:</i> past-month non-cannabis illicit drug use                                                                                | No significant association between living in MCL state and use.                                                                                                                   |    |
| 100. | Straub 2017 | United States<br><br>Legal regulation of cannabis for recreational use (RCL) | Repeated cross-sectional study, 2011-2012; 2012-2014; 2014-2016               | Population-based; Admin record data<br><br>N=25,763 | <i>Prevalence of use, decriminalized/regulated drug(s):</i> positive urine screen or documented use during pregnancy                                                      | No significant change in cannabis-positivity post-RCL.                                                                                                                            | A* |
| 101. | Suggs 1981  | United States<br><br>Cannabis decriminalization                              | Uncontrolled before-and-after study, 1977-1979                                | Population-based; Admin record data<br><br>N=719    | <i>Criminal justice involvement:</i> possession arrests and citations for adults and minors in two NE cities                                                              | No significant difference in mean monthly arrests following decriminalization.                                                                                                    | 12 |
|      |             |                                                                              |                                                                               |                                                     | <i>Criminal justice involvement:</i> possession prosecutions for adults and minors                                                                                        | Significant increase in prosecutions following decriminalization among minors (from mean of 1.92 to 5.75/month, $p<0.05$ ), but not adults (26.71 to 36.25, $p>0.05$ ).           |    |
|      |             |                                                                              |                                                                               |                                                     | <i>Criminal justice involvement:</i> defendants representing themselves                                                                                                   | Significant increase following decriminalization (from 18.07 to 30.75/month, $p<0.05$ ).                                                                                          |    |
|      |             |                                                                              |                                                                               |                                                     | <i>Criminal justice involvement:</i> case dismissal before trial                                                                                                          | Significant decrease following decriminalization (from 9.14 to 2.37/month, $p<0.001$ ).                                                                                           |    |
| 102. | Ullman 2017 | United States<br><br>Legal regulation of cannabis for medical use (MCL)      | Controlled before-and-after study, 1992-2012<br><br>[State-years without MCL] | Population-based; Household survey<br><br>N=757,677 | <i>Workplace absence:</i> self-reported absence for medical reasons in the past week                                                                                      | MCL associated with lower probability of absence ( $b= -0.0013$ , $SE=0.0007$ , $p<0.10$ ), with effects concentrated in loosely regulated MCL states, men and people aged 30-49. | 16 |
| 103. | Urfer 2014  | United States<br><br>Legal regulation of cannabis for recreational use (RCL) | Repeated cross-sectional study, 2011-2014                                     | Convenience sampling<br><br>N=12,082                | <i>Driving under the influence or with detectable concentration, decriminalized/regulated drug(s):</i> Proportion of THC-positive blood samples collected from CO drivers | Increase in THC-positive screens from 2011 (28%) to 2012 (59%) to 2013 (65%), $p=0.001$ . No significant change in first two months of legal cannabis sales.                      | 11 |

|      |             |                                                                                            |                                           |                                                           |                                                                                                                                                                                                                       |                                                                                                                                                                                                                                                                                                                                                                                                              |    |
|------|-------------|--------------------------------------------------------------------------------------------|-------------------------------------------|-----------------------------------------------------------|-----------------------------------------------------------------------------------------------------------------------------------------------------------------------------------------------------------------------|--------------------------------------------------------------------------------------------------------------------------------------------------------------------------------------------------------------------------------------------------------------------------------------------------------------------------------------------------------------------------------------------------------------|----|
| 104. | Wagner 2016 | United States<br>Legal regulation of cannabis for recreational use (RCL)                   | Repeated cross-sectional study, 2012-2015 | Convenience sampling<br>N=34                              | <i>Physical health consequences of use, decriminalized/regulated drug(s):</i> Reversible Cerebral Vasoconstriction Syndrome (RCVS) cases secondary to cannabis                                                        | Of 18 RCVS cases before RCL, 1 patient used cannabis. Of 16 cases after RCL, 5 used cannabis. No statistical tests reported.                                                                                                                                                                                                                                                                                 | A* |
| 105. | Wall 2016   | United States<br>Legal regulation of cannabis for medical use (MCL)                        | Repeated cross-sectional study, 2002-2010 | Population-based;<br>Household survey                     | <i>Prevalence of use, decriminalized/regulated drug(s):</i> past-month use among adolescents                                                                                                                          | *Reanalysis of Stolzenberg 2016 (#99)<br><br>After appropriate adjustment for pre-MCL prevalence, MCL not associated with adolescent use ( $b = 0.33\%$ ; $SE = 0.29\%$ , $p = 0.25$ ).                                                                                                                                                                                                                      | 18 |
| 106. | Wall 2011   | United States<br>Legal regulation of cannabis for medical use (MCL)                        | Repeated cross-sectional study, 2002-2008 | Population-based;<br>Household survey<br><br>N=23,300     | <i>Prevalence of use, decriminalized/regulated drug(s):</i> past-month use among adolescents<br><br><i>Perceived harmfulness of decriminalized/regulated drug(s):</i> perceived “great risk” of using monthly or more | Use was significantly higher in MCL states (average of 8.7% vs. 6.9%) but among states that passed MCL from 2004-2008, baseline use (pre-MCL) was already higher than in non-MCL states.<br><br>Perceived harmfulness was significantly lower in MCL states each year (average of 8.7% vs. 6.9%), but among states that passed MCL, baseline perceived risk (pre-MCL) was already lower than non-MCL states. | 13 |
| 107. | Wang 2018   | United States<br>Legal regulation of cannabis for recreational use (RCL)                   | Repeated cross-sectional study, 2005-2015 | Population-based;<br>Admin record data<br><br>N=4202      | <i>Health services utilization:</i> emergency or urgent care visits with a cannabis-related discharge code or THC-positive urine toxicology among adolescents                                                         | Cannabis-related visits increased from 1.8 per 1000 visits in 2009 to 4.9 per 1000 in 2015, following RCL ( $p < 0.0001$ ).                                                                                                                                                                                                                                                                                  | 11 |
| 108. | Wang 2017   | United States<br>Legal regulation of cannabis for medical (MCL) and recreational use (RCL) | Repeated cross-sectional study, 2000-2015 | Population-based;<br>Admin record data<br><br>N=7,432,254 | <i>Health services utilization:</i> hospitalizations with cannabis-related billing codes<br><br><i>Health services utilization:</i> emergency department visits with cannabis-related billing codes                   | Hospitalizations increased from 274 per 100,000 in 2000 (prior to MCL) to 593 in 2015 (after RCL). Statistically significant 25% increase in 2014 (RCL implementation with legal sales).<br><br>ED visits increased from 313 per 100,000 in 2011 to 478 in 2015, with highest rate in 2014 (554). Statistically significant increase in 2014 ( $p = 0.0005$ ).                                               | 14 |

|      |           |                                                                                                |                                                                                                       |                                                                                 |                                                                                                                                                                                                                                                                                                                                                                                                                                               |                                                                                                                                                                                                                                                                                                                                                                                                                                                                                                                                                   |    |
|------|-----------|------------------------------------------------------------------------------------------------|-------------------------------------------------------------------------------------------------------|---------------------------------------------------------------------------------|-----------------------------------------------------------------------------------------------------------------------------------------------------------------------------------------------------------------------------------------------------------------------------------------------------------------------------------------------------------------------------------------------------------------------------------------------|---------------------------------------------------------------------------------------------------------------------------------------------------------------------------------------------------------------------------------------------------------------------------------------------------------------------------------------------------------------------------------------------------------------------------------------------------------------------------------------------------------------------------------------------------|----|
|      |           |                                                                                                |                                                                                                       |                                                                                 | <i>Overdose or poisoning, decriminalized/regulated drug: cannabis exposure calls to CO poison control centers</i>                                                                                                                                                                                                                                                                                                                             | Poison control calls increased by 79.9% following RCL implementation in 2014, from 123 to 221 ( $p=0.0001$ ).                                                                                                                                                                                                                                                                                                                                                                                                                                     |    |
| 109. | Wang 2016 | United States<br><br>Legal regulation of cannabis for recreational use (RCL)                   | Repeated cross-sectional study, 2009-2015                                                             | Population-based;<br>Admin record data<br><br>N=62                              | <i>Overdose or poisoning, decriminalized/regulated drug: children's hospital visits related to cannabis exposure</i><br><br><i>Overdose or poisoning, decriminalized/regulated drug: poison control calls related to cannabis exposure among children 0-9</i>                                                                                                                                                                                 | RCL associated with increased cannabis-related visits (1.2 per 100,000 in 2012-2013 to 2.3 per 100,000 in 2014-2015, $p=0.02$ ).<br><br>RCL associated with increased cannabis-related calls in CO (2.7 per 100,000 in 2012-2013 to 5.3 per 100,000 in 2014-2015, $p<0.001$ ) and in comparison to rest of the US (34% increase in CO vs. 19% increase in remainder of US, $p=0.04$ ).                                                                                                                                                            | 13 |
| 110. | Wen 2018  | United States<br><br>Legal regulation of cannabis for medical (MCL) and recreational use (RCL) | Controlled before-and-after study, 2011-2016<br><br>[States without MCL or RCL over the study period] | Population-based;<br>Admin record data<br><br>N=1059 state-quarter observations | <i>Prescription drug use: number of opioid prescriptions covered by Medicaid on a quarterly, per-1000-Medicaid-enrollee basis in each state</i>                                                                                                                                                                                                                                                                                               | MCL and RCL associated with reductions in prescriptions of 5.88% (95% CI: -11.55%, -0.21%) and 6.38% (95% CI: -12.20, -0.56%) respectively.                                                                                                                                                                                                                                                                                                                                                                                                       | 17 |
| 111. | Wen 2015  | United States<br><br>Legal regulation of cannabis for medical use (MCL)                        | Repeated cross-sectional study, 2004-2012                                                             | Population-based;<br>Household survey<br><br>N=593,400                          | <i>Prevalence of use, decriminalized/regulated drug(s): past-month use; past-year initiation</i><br><br><i>Frequency of use, decriminalized/regulated drug(s): daily/almost daily use (&gt;20 days in month); # of days among past-month users</i><br><br><i>Prevalence of use, other drugs or alcohol: # of drinks in past month; # of binge drinking days; met DSM-IV alcohol use disorder criteria in past year; both cannabis use and</i> | MCL associated with increase in past-month use among adults 21+ (+1.32%, $p<0.05$ ) but not ages 12-20. MCL associated with increased risk of past-year initiation among ages 12-20 only (+0.32%, $p<0.05$ ).<br><br>MCL associated with increase in (almost) daily use among adults 21+ (+0.58%, $p<0.05$ ) but not ages 12-20.<br><br>MCL associated with frequency of binge drinking (+0.16 days, $p<0.05$ ) and past-month use of both cannabis and alcohol (+1.44%, $p<0.01$ ) among adults 21+. No associations with alcohol use among ages | 17 |

|      |               |                                                                         |                                                                               |                                                                                                                                                                       |                                                                                                                                              |                                                                                                                                             |    |
|------|---------------|-------------------------------------------------------------------------|-------------------------------------------------------------------------------|-----------------------------------------------------------------------------------------------------------------------------------------------------------------------|----------------------------------------------------------------------------------------------------------------------------------------------|---------------------------------------------------------------------------------------------------------------------------------------------|----|
|      |               |                                                                         |                                                                               |                                                                                                                                                                       | binge drinking in past month; use of cannabis and alcohol on same occasion in past month                                                     | 12-20, or with alcohol use disorders.                                                                                                       |    |
|      |               |                                                                         |                                                                               |                                                                                                                                                                       | <i>Prevalence of use, other drugs or alcohol</i> ; past-year use of non-medical prescription painkillers, heroin, cocaine                    | No immediate or lagged associations between MCL and illicit drug use in either age group.                                                   |    |
|      |               |                                                                         |                                                                               |                                                                                                                                                                       | <i>Substance use disorder or diagnosed dependence</i> : met DSM-IV cannabis use disorder criteria in past year                               | Lagged associations between MCL and cannabis use disorder among adults 21+ (+0.25% at 1 year, $p < 0.05$ ) but not among ages 12-20.        |    |
| 112. | Wen 2019      | United States<br><br>Legal regulation of cannabis for medical use (MCL) | Controlled before-and-after study, 2004-2012<br><br>[Non-MCL states]          | Population-based; Household survey<br><br>N=388,200                                                                                                                   | <i>Perceived availability of decriminalized/regulated drug(s)</i> : (very) easy to obtain, among adolescents and young adults                | No significant association between MCL and perceived availability among ages 12-17 or 18-25.                                                | 16 |
|      |               |                                                                         |                                                                               | <i>Attitudes towards use, decriminalized/regulated drug(s)</i> : acceptance of use by other adolescents/young adults; perceived parental acceptance (ages 12-17 only) | MCL significantly associated with lower perceived parental acceptance among ages 12-17 (-0.37%, 95% CI: -0.72, -0.03).                       |                                                                                                                                             |    |
|      |               |                                                                         |                                                                               | <i>Perceived harmfulness of decriminalized/regulated drug(s)</i> : no/low health risk of using once or twice per week                                                 | MCL significantly associated with higher perceived harmlessness among ages 18-25 only (+4.72%, 95% CI: 0.15, 9.28).                          |                                                                                                                                             |    |
| 113. | Williams 2017 | United States<br><br>Legal regulation of cannabis for medical use (MCL) | Controlled before-and-after study, 2004-2013<br><br>[State-years without MCL] | Population-based; Household survey                                                                                                                                    | <i>Prevalence of use, decriminalized/regulated drug(s)</i> : past-month use                                                                  | Only loosely regulated MCL associated with higher use, among adults 26+ only (adjusted prevalence difference = +1.46%, 95% CI: 0.33, 2.58). | 15 |
|      |               |                                                                         |                                                                               | <i>Frequency of use, decriminalized/legalized drug(s)</i> : heavy use in past year (>300 days), among past-year users                                                 | Tightly regulated MCL associated with less heavy use, among ages 12-17 only (adjusted prevalence difference = -3.67%, 95% CI: -7.24, -0.11). |                                                                                                                                             |    |
|      |               |                                                                         |                                                                               | <i>Substance use disorder or diagnosed dependence</i> met DSM-IV criteria for cannabis use disorder                                                                   | Loosely regulated MCL associated with lower prevalence of cannabis use disorder, among ages 18-25 only (-0.80%, 95% CI: -1.45, -0.16).       |                                                                                                                                             |    |

1  
2  
3  
4  
5  
6  
7  
8  
9  
10  
11  
12  
13  
14  
15  
16  
17  
18  
19  
20  
21  
22  
23  
24  
25  
26  
27  
28  
29  
30  
31  
32  
33  
34  
35  
36  
37  
38  
39  
40  
41  
42  
43  
44  
45  
46  
47

|      |               |                                             |                                                                                                            |                                                    |                                                                              |                                                                                                                                                                                                                                                                            |    |
|------|---------------|---------------------------------------------|------------------------------------------------------------------------------------------------------------|----------------------------------------------------|------------------------------------------------------------------------------|----------------------------------------------------------------------------------------------------------------------------------------------------------------------------------------------------------------------------------------------------------------------------|----|
| 114. | Williams 2014 | Australia<br><br>Cannabis decriminalization | Controlled before-and-after study, 1998;2001;2004;2007;2010<br><br>[state-years without decriminalization) | Population-based; Household survey<br><br>N=39,087 | <i>Age of first use, decriminalized/regulated drug(s):</i> age at initiation | Decriminalization not associated with hazard of cannabis uptake overall but interacts with age such that minors under decriminalization have a 12% higher hazard rate of uptake while adults under decriminalization have an 11% lower hazard rate of uptake ( $p<0.01$ ). | 18 |
|------|---------------|---------------------------------------------|------------------------------------------------------------------------------------------------------------|----------------------------------------------------|------------------------------------------------------------------------------|----------------------------------------------------------------------------------------------------------------------------------------------------------------------------------------------------------------------------------------------------------------------------|----|

\*A = abstract; no quality appraisal performed.

For peer review only



Supplementary Table 2. Direction of effect of decriminalization or legal regulation, by outcome category

| Outcomes                                                                                           | # of outcomes | # reporting beneficial effects | # reporting harmful effects | # reporting mixed effects | # reporting no effect | Article # (See Included Studies)                                | Average quality (of 18, excluding abstracts) |
|----------------------------------------------------------------------------------------------------|---------------|--------------------------------|-----------------------------|---------------------------|-----------------------|-----------------------------------------------------------------|----------------------------------------------|
| Accidents, motor vehicle                                                                           | 4             | 1                              | 1                           | 1                         | 1                     | 3, 8, 43, 91                                                    | 14.3                                         |
| Accidents, other                                                                                   | 4             | 0                              | 2                           | 1                         | 1                     | 5, 11, 14, 97                                                   | 12.7                                         |
| Addiction treatment utilization                                                                    | 4             | 0                              | 1                           | 1                         | 2                     | 1, 25, 78, 83                                                   | 14.5                                         |
| Age of first use, decriminalized/regulated drug                                                    | 3             | 0                              | 0                           | 1                         | 2                     | 23, 84, 114                                                     | 12.7                                         |
| Attitudes towards use, decriminalized/regulated drug                                               | 6             | 0                              | 1                           | 3                         | 2                     | 27, 71, 89, 92, 112                                             | 14.0                                         |
| Availability of decriminalized/regulated drug                                                      | 3             | 0                              | 0                           | 1                         | 2                     | 6, 31, 86                                                       | 13.3                                         |
| BMI                                                                                                | 1             | 1                              | 0                           | 0                         | 0                     | 90                                                              | 16.0                                         |
| Costs, health care                                                                                 | 3             | 2                              | 1                           | 0                         | 0                     | 15, 17, 33                                                      | 15.7                                         |
| Costs, other                                                                                       | 3             | 3                              | 0                           | 0                         | 0                     | 33                                                              | 13.0                                         |
| Crime (non-drug)                                                                                   | 9             | 5                              | 0                           | 0                         | 4                     | 7, 44, 74, 95                                                   | 14.0                                         |
| Criminal justice involvement                                                                       | 8             | 1                              | 3                           | 1                         | 3                     | 7, 25, 36, 101                                                  | 13.8                                         |
| Disclosure of use to healthcare provider                                                           | 1             | 1                              | 0                           | 0                         | 0                     | 87                                                              | N/A                                          |
| Educational outcomes                                                                               | 3             | 0                              | 2                           | 1                         | 0                     | 81                                                              | 16.0                                         |
| Frequency of use, decriminalized/regulated drug                                                    | 16            | 1                              | 3                           | 4                         | 8                     | 6, 18, 30, 36, 46, 47, 59, 60, 64, 69, 72, 78, 81, 89, 111, 113 | 14.4                                         |
| Health services utilization (excluding addictions treatment)                                       | 12            | 2                              | 6                           | 1                         | 3                     | 13, 19, 34, 54, 55, 73, 96, 107, 108                            | 13.8                                         |
| Driving under the influence or with detectable concentrations of the decriminalized/regulated drug | 8             | 0                              | 5                           | 1                         | 2                     | 26, 42, 67, 82, 85, 98, 103                                     | 12.0                                         |

| <b>Outcomes</b>                                                                            | <b>Number of outcomes</b> | <b># reporting beneficial effects</b> | <b># reporting harmful effects</b> | <b># reporting mixed effects</b> | <b># reporting no effect</b> | <b>Article # (See Included Studies)</b>                                                                                                                                              | <b>Average quality score</b> |
|--------------------------------------------------------------------------------------------|---------------------------|---------------------------------------|------------------------------------|----------------------------------|------------------------------|--------------------------------------------------------------------------------------------------------------------------------------------------------------------------------------|------------------------------|
| <b>Driving under the influence or with detectable concentrations, other drug/alcohol</b>   | 3                         | 0                                     | 0                                  | 1                                | 2                            | 42, 58, 98                                                                                                                                                                           | 14.5                         |
| <b>Mental health conditions, suicide, or self-harm</b>                                     | 4                         | 0                                     | 1                                  | 2                                | 1                            | 4, 29, 30, 37                                                                                                                                                                        | 15.0                         |
| <b>Mode of use, decriminalized/regulated drug</b>                                          | 1                         | 0                                     | 0                                  | 0                                | 1                            | 39                                                                                                                                                                                   | 13.0                         |
| <b>Opioid therapy compliance</b>                                                           | 1                         | 0                                     | 0                                  | 0                                | 1                            | 63                                                                                                                                                                                   | N/A                          |
| <b>Overdose or poisoning (incl. unintentional exposures) decriminalized/regulated drug</b> | 7                         | 0                                     | 7                                  | 0                                | 0                            | 10, 12, 75, 76, 108, 109                                                                                                                                                             | 13.3                         |
| <b>Overdose or poisoning, other drugs</b>                                                  | 7                         | 4                                     | 0                                  | 2                                | 1                            | 9, 10, 62, 80, 83, 88, 96                                                                                                                                                            | 15.6                         |
| <b>Perceived availability, decriminalized/regulated drug</b>                               | 9                         | 0                                     | 2                                  | 2                                | 5                            | 27, 39, 53, 60, 65, 68, 71, 92, 112                                                                                                                                                  | 14.1                         |
| <b>Perceived harmfulness, decriminalized/regulated drug</b>                                | 12                        | 1                                     | 2                                  | 6                                | 3                            | 18, 22, 30, 38, 39, 52, 59, 60, 71, 92, 106, 112                                                                                                                                     | 13.9                         |
| <b>Physical health consequences of use, decriminalized/regulated drug</b>                  | 1                         | 0                                     | 0                                  | 0                                | 1                            | 104                                                                                                                                                                                  | N/A                          |
| <b>Potency, decriminalized/regulated drug</b>                                              | 1                         | 0                                     | 0                                  | 0                                | 1                            | 93                                                                                                                                                                                   | 16.0                         |
| <b>Prescription drug use (medical use)</b>                                                 | 9                         | 6                                     | 0                                  | 1                                | 2                            | 15, 16, 17, 56, 61, 83, 94, 110                                                                                                                                                      | 16.3                         |
| <b>Prevalence of use, decriminalized/regulated drug</b>                                    | 50                        | 2                                     | 13                                 | 11                               | 24                           | 1, 2, 6, 18, 20, 21, 22, 24, 27, 28, 34, 35, 36, 38, 39, 40, 41, 46, 48, 49, 50, 51, 52, 53, 63, 64, 65, 66, 68, 69, 70, 71, 72, 78, 79, 81, 84, 87, 89, 99, 100, 105, 106, 111, 113 | 14.6                         |

| <b>Outcomes</b>                                            | <b>Number of outcomes</b> | <b># reporting beneficial effects</b> | <b># reporting harmful effects</b> | <b># reporting mixed effects</b> | <b># reporting no effect</b> | <b>Article # (See Included Studies)</b>                 | <b>Average quality score</b> |
|------------------------------------------------------------|---------------------------|---------------------------------------|------------------------------------|----------------------------------|------------------------------|---------------------------------------------------------|------------------------------|
| <b>Prevalence or frequency of use, other drugs/alcohol</b> | 21                        | 2                                     | 2                                  | 6                                | 11                           | 18, 21, 35, 47, 49, 50, 53, 57, 60, 66, 72, 83, 99, 111 | 15.6                         |
| <b>Price of drugs</b>                                      | 5                         | 0                                     | 1                                  | 1                                | 3                            | 3, 31, 32, 45, 77                                       | 14.0                         |
| <b>Substance use disorder or diagnosed dependence</b>      | 5                         | 0                                     | 1                                  | 2                                | 2                            | 40, 59, 69, 111, 113                                    | 14.6                         |
| <b>Workplace absence</b>                                   | 1                         | 1                                     | 0                                  | 0                                | 0                            | 102                                                     | 16.0                         |

For peer review only

## Appendix A: Search Strategy and Results

Database: Ovid MEDLINE: Epub Ahead of Print, In-Process & Other Non-Indexed Citations,  
Ovid MEDLINE® Daily and Ovid MEDLINE® <1946-Present>  
Search Strategy:

-----

1 ((Marijuana or marihuana or cannabis or cannabinoid\* or psychoactive product\* or  
2 psychoactive substances\* or narcotic\*) adj5 (Legaliz\* or legalis\* or decriminal\* or depenaliz\* or  
3 depenalis\* or deregulat\* or liberaliz\* or liberalis\*)).tw,kf.  
4  
5 2 ((marijuana or marihuana or cannabis or cannabinoid\*) adj1 (policy or policies or law or  
6 laws or licens\* or legislation or dispensar\* or store or stores or regulat\* or recreational or  
7 medical or medicinal or nonmedical or legal\*)).tw,kf.  
8 3 (legal high or legal highs).tw,kf.  
9 4 Psychoactive Substances Act.tw,kf.  
10 5 2 or 3 or 4  
11 6 new psychoactive product\*.tw,kf.  
12 7 novel psychoactive product\*.tw,kf.  
13 8 novel psychoactive substance\*.tw,kf.  
14 9 new psychoactive substance\*.tw,kf.  
15 10 novel psychoactive drug\*.tw,kf.  
16 11 new psychoactive substances\*.tw,kf.  
17 12 Designer Drugs/sd [Supply & Distribution]  
18 13 Medical Marijuana/sd [Supply & Distribution]  
19 14 exp Street Drugs/lj, sd [Legislation & Jurisprudence, Supply & Distribution]  
20 15 Marijuana Smoking/lj [Legislation & Jurisprudence]  
21 16 Drug Users/lj, sn [Legislation & Jurisprudence, Statistics & Numerical Data]  
22 17 "Drug and Narcotic Control"/lj [Legislation & Jurisprudence]  
23 18 or/6-17  
24 19 (Legal\* or decriminal\* or depenaliz\* or depenalis\* or deregulat\* or liberaliz\* or liberalis\*  
25 or policy or policies or law or laws or licens\* or legislation or regulat\*).ti.  
26 20 18 and 19  
27 21 5 or 20  
28 22 limit 21 to (clinical study or clinical trial, all or comparative study or evaluation studies or  
29 meta analysis or multicenter study or observational study or pragmatic clinical trial or systematic  
30 reviews or validation studies)  
31 23 Epidemiologic studies/  
32 24 exp case control studies/  
33 25 exp cohort studies/  
34 26 Case control.tw.  
35 27 (cohort adj (study or studies)).tw.  
36 28 Cohort analy\$.tw.  
37 29 (Follow up adj (study or studies)).tw.  
38 30 (observational adj (study or studies)).tw.  
39 31 Longitudinal.tw.  
40 32 Retrospective.tw.  
41 33 Cross sectional.tw.  
42 34 Cross-sectional studies/

## Appendix A: Search Strategy and Results

35 or/23-34 [ Observational Studies search filter used by SIGN (Scottish Intercollegiate  
 Guidelines Network <http://www.sign.ac.uk/methodology/filters.html#obs> ]  
 36 21 and 35  
 37 exp Epidemiologic Methods/  
 38 amphetamine-related disorders/ep or cocaine-related disorders/ep or drug overdose/ep or  
 9 inhalant abuse/ep or marijuana abuse/ep or exp opioid-related disorders/ep or phencyclidine  
 10 abuse/ep or psychoses, substance-induced/ep or substance abuse, intravenous/ep  
 11 Prevalence/  
 12 Incidence/ or incidence.ti,ab,kw.  
 13 (harm or harms).tw,kf.  
 14 ("marijuana use" or "marijuana availability" or "cannabis use" or cannabis availability or  
 15 "drug use").tw,kf.  
 16 or/37-42  
 17 21 and 43  
 18 1 or 22 or 36 or 44  
 19 45 not (exp animals/ not humans.sh.)  
 20 limit 46 to (comment or editorial or letter)  
 21 46 not 47  
 22 limit 48 to yr="1970 -Current"

| Database                                                                                                                                                                                              | Number of Results |
|-------------------------------------------------------------------------------------------------------------------------------------------------------------------------------------------------------|-------------------|
| Medline (OVID)                                                                                                                                                                                        | 2041              |
| Embase (OVID)                                                                                                                                                                                         | 1453              |
| PsycINFO (OVID)                                                                                                                                                                                       | 1393              |
| Web of Science:<br>Science Citation Index<br>Social Sciences Citation Index<br>Conference Proceedings Citation Index- Science<br>Conference Proceedings Citation Index- Social Science & Humanities   | 1358              |
| Criminal Justice Abstracts (EBSCO)                                                                                                                                                                    | 1074              |
| ProQuest Databases:<br>Applied Social Sciences Index & Abstracts (ASSIA),<br>International Bibliography of the Social Sciences (IBSS),<br>PAIS Index,<br>Policy File Index,<br>Sociological Abstracts | 910               |
| Total Number of Results                                                                                                                                                                               | <b>8229</b>       |
| Total number of results after duplicates removed in EndNote                                                                                                                                           | <b>4860</b>       |

## Appendix B: Quality Appraisal Checklist

**Adapted from:** Downs SH, Black N. The feasibility of creating a checklist for the assessment of the methodological quality both of randomised and non-randomised studies of health care interventions. *J Epidemiol Community Health*. 1998;52(6):377-384.

1. Is the hypothesis/aim/objective of the study clearly described?

Yes (1)

No (0)

2. Are the main outcomes to be measured clearly described in the Introduction or Methods section? *If the main outcomes are first mentioned in the Results section, the question should be answered no.*

Yes (1)

No (0)

3. Are the characteristics of the individuals included in the study clearly described? In cohort studies and trials, inclusion and/or exclusion criteria should be given.

Yes (1)

No (0)

4. Are the interventions of interest clearly described?

Yes (1)

No (0)

5. Are the distributions of principal confounders in each group of subjects to be compared clearly described?

Yes (2)

Partially (1)

No (0)

6. Are the main findings of the study clearly described? *Simple outcome data (including denominators and numerators) should be reported for all major findings so that the reader can check the major analyses and conclusions. (This question does not cover statistical tests which are considered below).*

Yes (1)

No (0)

7. Does the study provide estimates of the random variability in the data for the main outcome (e.g., IQR, standard deviation, confidence interval, etc.)?

Yes (1)

No (0)

N/A [there is no variability because data come from the entire population] (1)

## Appendix B: Quality Appraisal Checklist

1  
2  
3 8. Have actual probability values been reported (e.g. 0.035 rather than  $<0.05$ ) for the main  
4 outcomes except where the probability value is less than 0.001? (*Confidence intervals are*  
5 *acceptable in place of p-values*)

6  Yes (1)

7  
8  No (0)

9  
10 9. Were the subjects that were asked to participate in the study representative of the entire  
11 population from which they were recruited? *The study must identify the source population for*  
12 *participants and describe how they were selected. Participants would be representative if they*  
13 *comprised the entire source population or a random sample. Random sampling is only feasible*  
14 *where a list of all members of the relevant population exists.*

15  Yes (1)

16  No (0)

17  Unable to determine (0)

18  
19 10. Were those subjects who agreed to participate representative of the entire population from  
20 which they were recruited? *The proportion of those asked who agreed should be stated.*  
21 *Validation that the sample was representative would include demonstrating that the distribution*  
22 *of the main confounding factors was the same in the study sample and the source population.*

23  Yes (1)

24  No (0)

25  Unable to determine (0)

26  
27 11. If any of the results of the study were based on “data dredging”, was this made clear?  
28 *Any analyses that had not been planned at the outset of the study should be clearly indicated. If*  
29 *no retrospective unplanned subgroup analyses were reported, then answer yes.*

30  Yes (1)

31  No (0)

32  Unable to determine (0)

33  
34 12. In trials and cohort studies, do the analyses adjust for different lengths of follow-up of  
35 participants, or in case-control studies, is the time period between the intervention and outcome  
36 the same for cases and controls? *Where follow-up was the same for all study participants the*  
37 *answer should be yes. If different lengths of follow-up were adjusted for by, for example, survival*  
38 *analysis the answer should be yes. Studies where differences in follow-up are ignored should be*  
39 *answered no.*

40  Yes or N/A (1)

41  No (0)

42  Unable to determine (0)

43  
44 13. Were the statistical tests used to assess the main outcomes appropriate? *The statistical*  
45 *techniques used must be appropriate to the data. For example non-parametric methods should*  
46 *be used for small sample sizes. Where little statistical analysis has been undertaken but where*  
47 *there is no evidence of bias, the question should be answered yes. If the distribution of the data*



## Appendix B: Quality Appraisal Checklist

(normal or not) is not described it must be assumed that the estimates used were appropriate and the question should be answered yes.

Yes (1)

No (0)

Unable to determine from article (0)

14. Were the main outcome measures used accurate (valid and reliable)? *For studies where the outcome measures are clearly described, the question should be answered yes. For studies which refer to other work or that demonstrates the outcome measures are accurate, the question should be answered as yes.*

Yes (1)

No (0)

Unable to determine (0)

15. Were the participants in different comparison groups recruited from the same population or from comparable populations? *Answer NO for studies without a comparison/control group.*

Yes (1)

No (0)

Unable to determine (0)

16. Were study subjects in different intervention groups recruited over the same period of time? *Answer NO for studies without a comparison/control group.*

Yes (1)

No (0)

Unable to determine (0)

17. Was there adequate adjustment for confounding in the analyses from which the main findings were drawn?

Yes (1)

No (0)

Unable to determine (0)

## Appendix C: Included Studies

**INCLUDED STUDIES**

1. Adam C, Raschzok A. Cannabis policy and the uptake of treatment for cannabis-related problems. *Drug Alcohol Rev.* 2017;36(2):171-177.
2. Allshouse AA, Metz TD. Trends in self-reported and urine toxicology (UTOX)-detected maternal marijuana use before and after legalization. *Am J Obstet Gynecol.* 2016;1:S444-S445.
3. Anderson DM, Hansen B, Rees DI. Medical marijuana laws, traffic fatalities, and alcohol consumption. *J Law Econ.* 2013;56(2):333-369.
4. Anderson DM, Rees DI, Sabia JJ. Medical marijuana laws and suicides by gender and age. *Am J Public Health.* 2014;104(12):2369-2376.
5. Anderson DM, Rees DI, Tekin E. Medical marijuana laws and workplace fatalities in the United States. *Int J Drug Policy.* 2018;60:33-39.
6. Anderson MD, Hansen B, Rees DI. Medical marijuana laws and teen marijuana use. *Am Law Econ Rev.* 2015;17(2):495-528.
7. Arredondo J, Gaines T, Manian S, et al. The law on the streets: evaluating the impact of Mexico's drug decriminalization reform on drug possession arrests in Tijuana, Mexico. *Int J Drug Policy.* 2018;54:1-8. doi:10.1016/j.drugpo.2017.12.006.
8. Aydelotte JD, Brown LH, Luftman KM, et al. Crash fatality rates after recreational marijuana legalization in Washington and Colorado. *Am J Public Health.* 2017;107(8):1329-1331.
9. Bachhuber MA, Saloner B, Cunningham CO, Barry CL. Medical cannabis laws and opioid analgesic overdose mortality in the United States, 1999-2010. *JAMA Intern Med.* 2014;174(10):1668-1673.
10. Banerji S, Hoyte C. Marijuana and synthetic cannabinoid patterns in a US state with legalized marijuana: a 5-year NPDS review. *Clin Toxicol.* 2017;55 (5):418-419.
11. Bell C, Slim J, Flaten HK, Lindberg G, Arek W, Monte AA. Butane hash oil burns associated with marijuana liberalization in Colorado. *J Med Toxicol.* 2015;11(4):422-425.
12. Bjordal M, Garrard A. The impact of marijuana legalization on poison center calls in the evergreen state. *Clin Toxicol.* 2015;53(7):694.
13. Blachly PH. Effects of decriminalization of marijuana in Oregon. *Ann N Y Acad Sci.* 1976;282:405-415.
14. Boyle C. Butane hash oil manufacturing related burn injury: a disturbing trend. *J Burn Care Res.* 2014;35:S112.
15. Bradford AC, Bradford WD. Medical marijuana laws reduce prescription medication use in Medicare Part D. *Health Aff.* 2016;35(7):1230-1236.
16. Bradford AC, Bradford WD, Abraham A, Bagwell Adams G. Association between US state medical cannabis laws and opioid prescribing in the Medicare Part D population. *JAMA Intern Med.* 2018;178(5):667-672.
17. Bradford AC, Bradford WD. Medical marijuana laws may be associated with a decline in the number of prescriptions for Medicaid enrollees. *Health Aff.* 2017;36(5):945-951.
18. Brooks-Russell A, Ma M, Levinson AH, et al. Adolescent marijuana use, marijuana-related perceptions, and use of other substances before and after initiation of retail marijuana sales in Colorado (2013-2015). *Prev Sci.* 2019;20(2):185-193.
19. Calcaterra SL, Keniston A, Hull ML. The impact of the legalization of recreational marijuana on a safety-net health system. *J Gen Intern Med.* 2018;33(S2):S361.

## Appendix C: Included Studies

20. Cassidy TA, Green T, Garg P, Butler SF. Up in smoke? Marijuana initiation and prevalence trends in Colorado: 2008 to 2014. *Drug Alcohol Depend.* 2015;156:e39.
21. Cerda M, Sarvet AL, Wall M, et al. Medical marijuana laws and adolescent use of marijuana and other substances: alcohol, cigarettes, prescription drugs, and other illicit drugs. *Drug Alcohol Depend.* 2018;183:62-68.
22. Cerda M, Wall M, Feng T, et al. Association of state recreational marijuana laws with adolescent marijuana use. *JAMA Pediatr.* 2017;171(2):142-149.
23. Cervený J, Chomynova P, Mravčík V, van Ours JC. Cannabis decriminalization and the age of onset of cannabis use. *Int J Drug Policy.* 2017;43:122-129.
24. Choo EK, Benz M, Zaller N, Warren O, Rising KL, McConnell KJ. The impact of state medical marijuana legislation on adolescent marijuana use. *J Adolesc Health.* 2014;55(2):160-166.
25. Chu YW. The effects of medical marijuana laws on illegal marijuana use. *J Health Econ.* 2014;38:43-61.
26. Couper FJ, Peterson BL. The prevalence of marijuana in suspected impaired driving cases in Washington state. *J Anal Toxicol.* 2014;38(8):569-574.
27. Donnelly N, Hall W, Christie P. The effects of partial decriminalisation on cannabis use in South Australia, 1985 to 1993. *Aust J Public Health.* 1995;19(3):281-287.
28. Donnelly N, Hall W, Christie P. The effects of the Cannabis Expiation Notice System on the prevalence of cannabis use in South Australia: evidence from the National Drug Strategy Household Surveys 1985-95. *Drug Alcohol Rev.* 2000;19(3):265-269.
29. Dutra LM, Parish WJ, Gourdet CK, Wylie SA, Wiley JL. Medical cannabis legalization and state-level prevalence of serious mental illness in the National Survey on Drug Use and Health (NSDUH) 2008-2015. *Int Rev Psychiatry.* 2018;30(3):203-215.
30. Estoup AC, Moise-Campbell C, Varma M, Stewart DG. The impact of marijuana legalization on adolescent use, consequences, and perceived risk. *Subst Use Misuse.* 2016;51(14):1881-1887.
31. Feige C, Miron JA. The opium wars, opium legalization and opium consumption in China. *Appl Econ Lett.* 2008;15(12):911-913.
32. Félix S, Portugal P. Drug decriminalization and the price of illicit drugs. *Int J Drug Policy.* 2017;39:121-129.
33. Gonçalves R, Lourenço A, da Silva SN. A social cost perspective in the wake of the Portuguese strategy for the fight against drugs. *Int J Drug Policy.* 2015;26(2):199-209.
34. Gorman DM, Huber Jr JC. Do medical cannabis laws encourage cannabis use? *Int J Drug Policy.* 2007;18(3):160-167.
35. Grant TM, Graham JC, Carlini BH, Ernst CC, Brown NN. Use of marijuana and other substances among pregnant and parenting women with substance use disorders: changes in Washington state after marijuana legalization. *J Stud Alcohol Drugs.* 2018;79(1):88-95.
36. Grucza RA, Vuolo M, Krauss MJ, et al. Cannabis decriminalization: a study of recent policy change in five U.S. states. *Int J Drug Policy.* 2018;59:67-75.
37. Grucza RA, Hur M, Agrawal A, et al. A reexamination of medical marijuana policies in relation to suicide risk. *Drug Alcohol Depend.* 2015;152:68-72.
38. Harper S, Strumpf EC, Kaufman JS. Do medical marijuana laws increase marijuana use? Replication study and extension. *Ann Epidemiol.* 2012;22(3):207-212.

## Appendix C: Included Studies

39. Harpin SB, Brooks-Russell A, Ma M, James KA, Levinson AH. adolescent marijuana use and perceived ease of access before and after recreational marijuana implementation in Colorado. *Subst Use Misuse*. 2018;53(3):451-456.
40. Hasin DS, Sarvet AL, Cerda M, et al. US adult illicit cannabis use, cannabis use disorder, and medical marijuana laws: 1991-1992 to 2012-2013. *JAMA Psychiatry*. 2017;74(6):579-588.
41. Hasin DS, Wall M, Keyes KM, et al. Medical marijuana laws and adolescent marijuana use in the USA from 1991 to 2014: results from annual, repeated cross-sectional surveys. *Lancet Psychiatry*. 2015;2(7):601-608.
42. Hasin D, Sarvet A, Cerda M, Keyes KM, Fink DS. Driving under the influence of alcohol or cannabis in the U.S., 1991-1992 to 2012-2013: relationship to state medical marijuana laws. *Alcohol Clin Exp Res*. 2017;41:250A.
43. Hoyte CO, Caruso J. The prevalence of marijuana in fatalities involving operators of motor vehicles in Denver County, Colorado, USA. *Clin Toxicol*. 2015;53(4):268.
44. Huber A, Newman R, LaFave D. Cannabis control and crime: medicinal use, depenalization and the war on drugs. *BE Journal of Economic Analysis & Policy*. 2016;16(4). doi:10.1515/bejeap-2015-0167
45. Hunt P, Pacula RL. early impacts of marijuana legalization: an evaluation of prices in Colorado and Washington. *J Prim Prev*. 2017;38(3):221-248.
46. Johnson J, Hodgkin D, Harris SK. The design of medical marijuana laws and adolescent use and heavy use of marijuana: analysis of 45 states from 1991 to 2011. *Drug Alcohol Depend*. 2017;170:1-8.
47. Jones J, Jones KN, Peil J. The impact of the legalization of recreational marijuana on college students. *Addict Behav*. 2018;77:255-259.
48. Jones JT, Baldwin A, Shu I. A comparison of meconium screening outcomes as an indicator of the impact of state-level relaxation of marijuana policy. *Drug Alcohol Depend*. 2015;156:e104-e105.
49. Kerr DCR, Bae H, Koval AL. Oregon recreational marijuana legalization: changes in undergraduates' marijuana use rates from 2008 to 2016. *Psychol Addict Behav*. 2018;32(6):670-678.
50. Kerr DCR, Bae H, Phibbs S, Kern AC. Changes in undergraduates' marijuana, heavy alcohol and cigarette use following legalization of recreational marijuana use in Oregon. *Addiction*. 2017;112(11):1992-2001. doi:10.1111/add.13906
51. Kerr WC, Lui C, Ye Y. Trends and age, period and cohort effects for marijuana use prevalence in the 1984-2015 US National Alcohol Surveys. *Addiction*. 2018;113(3):473-481. doi:10.1111/add.14031
52. Keyes KM, Wall M, Cerda M, et al. How does state marijuana policy affect US youth? Medical marijuana laws, marijuana use and perceived harmfulness: 1991-2014. *Addiction*. 2016;111(12):2187-2195.
53. Khatapoush S, Hallfors D. "Sending the wrong message": did medical marijuana legalization in California change attitudes about and use of marijuana? *J Drug Issues*. 2004;34(4):751-770.
54. Kim HS, Anderson JD, Saghafi O, Heard KJ, Monte AA. Cyclic vomiting presentations following marijuana liberalization in Colorado. *Acad Emerg Med*. 2015;22(6):694-699.
55. Kim HS, Hall KE, Genco EK, Van Dyke M, Barker E, Monte AA. Marijuana tourism and emergency department visits in Colorado. *N Engl J Med*. 2016;374(8):797-798.

## Appendix C: Included Studies

- 1
- 2
- 3
- 4 56. Kim JH, Santaella J, Cerda M, Martins SS. Medical marijuana laws and annual opioid analgesic sales in the United States. *Drug Alcohol Depend.* 2015;156:e111.
- 5
- 6 57. Kim JH, Santaella J, Mauro PM, et al. Nonmedical use of prescription opioids and medical marijuana laws in the US from 2004-2013. *Drug Alcohol Depend.* 2017;171:e102-e103.
- 7
- 8 58. Kim JH, Santaella-Tenorio J, Mauro C, et al. State medical marijuana laws and the prevalence of opioids detected among fatally injured drivers. *Am J Public Health.* 2016;106(11):2032-2037.
- 9
- 10
- 11 59. Kosterman R, Bailey JA, Guttmannova K, et al. Marijuana legalization and parents' attitudes, use, and parenting in Washington state. *J Adolesc Health.* 2016;59(4):450-456.
- 12
- 13 60. Larimer ME, Lee CM, Kilmer JR, Rhew I, Fossos-Wong N. Risk perception, access, and use of marijuana among young adults following legalization in Washington state. *Alcohol Clin Exp Res.* 2015;39:261A.
- 14
- 15 61. Liang D, Bao Y, Wallace M, Grant I, Shi Y. Medical cannabis legalization and opioid prescriptions: evidence on US Medicaid enrollees during 1993-2014. *Addiction.* 2018;113(11):2060-2070.
- 16
- 17 62. Livingston MD, Barnett TE, Delcher C, Wagenaar AC. Recreational cannabis legalization and opioid-related deaths in Colorado, 2000-2015. *Am J Public Health.* 2017;107(11):1827-1829.
- 18
- 19 63. Lo SY, Baird GS, Hoofnagle A, Greene DN. THC use and marijuana legalization do not influence chronic opioid therapy compliance. *Am J Clin Pathol.* 2015;143:A046.
- 20
- 21 64. Lynne-Landsman SD, Livingston MD, Wagenaar AC. Effects of state medical marijuana laws on adolescent marijuana use. *Am J Public Health.* 2013;103(8):1500-1506.
- 22
- 23 65. Martins SS, Mauro CM, Santaella-Tenorio J, et al. State-level medical marijuana laws, marijuana use and perceived availability of marijuana among the general U.S. population. *Drug Alcohol Depend.* 2016;169:26-32.
- 24
- 25 66. Mason W, Fleming CB, Ringle JL, Hanson K, Gross TJ, Haggerty KP. Prevalence of marijuana and other substance use before and after Washington State's change from legal medical marijuana to legal medical and nonmedical marijuana: cohort comparisons in a sample of adolescents. *Subst Abus.* 2016;37(2):330-335.
- 26
- 27 67. Masten SV, Guenzburger GV. Changes in driver cannabinoid prevalence in 12 US states after implementing medical marijuana laws. *J Safety Res.* 2014;50:35-52.
- 28
- 29 68. Mauro C, Santaella J, Kim JH, Wall MM, Martins SS. Does perceived availability of marijuana explain changes in marijuana use after medical marijuana law implementation among U.S. adults? *Drug Alcohol Depend.* 2017;171:e134.
- 30
- 31 69. Mauro CM, Newswanger P, Santaella-Tenorio J, Mauro PM, Carliner H, Martins SS. Impact of medical marijuana laws on state-level marijuana use by age and gender, 2004-2013. *Prev Sci.* 2019;20(2):205-214. doi:10.1007/s11121-017-0848-3
- 32
- 33 70. Merker AM, Riaz M, Friedman S, Allegretti JR, Korzenik J. Legalization of medicinal marijuana has minimal impact on use patterns in patients with inflammatory bowel disease. *Inflamm Bowel Dis.* 2018;24(11):2309-2314.
- 34
- 35 71. Miech R, Johnston LA, O'Malley P, Bachman J, Schulenberg J, Patrick M. Trends in use of and attitudes toward marijuana among youth before and after decriminalization: the case of California 2007-2013. *Drug Alcohol Depend.* 2015;156:e151-e152.
- 36
- 37 72. Miller AM, Rosenman R, Cowan BW. Recreational marijuana legalization and college student use: early evidence. *SSM Popul Health.* 2017;3:649-657.
- 38
- 39
- 40
- 41
- 42
- 43
- 44
- 45
- 46
- 47
- 48
- 49
- 50
- 51
- 52
- 53
- 54
- 55
- 56
- 57
- 58
- 59
- 60



## Appendix C: Included Studies

73. Model KE. The effect of marijuana decriminalization on hospital emergency room drug episodes: 1975-1978. *J Am Stat Assoc.* 1993;88(423):737-747.
74. Morris RG, TenEyck M, Barnes JC, Kovandzic TV. The effect of medical marijuana laws on crime: evidence from state panel data, 1990-2006. *PloS One.* 2014;9(3):e92816.
75. Nappe T, Banerji S, Hoyte C. Drug exposure trends since decriminalization of marijuana in Colorado. *Clin Toxicol.* 2016;54(8):712-713.
76. Onders B, Casavant MJ, Spiller HA, Chounthirath T, Smith GA. Marijuana exposure among children younger than six years in the United States. *Clin Pediatr.* 2016;55(5):428-436.
77. Pacula RL, Kilmer B, Grossman M, Chaloupka FJ. Risks and prices: the role of user sanctions in marijuana markets. *BE Journal of Economic Analysis & Policy.* 2010;10(1).
78. Pacula RL, Powell D, Heaton P, Sevigny EL. Assessing the effects of medical marijuana laws on marijuana use: the devil is in the details. *J Policy Anal Manage.* 2015;34(1):7-31.
79. Parnes JE, Smith JK, Conner BT. Reefer madness or much ado about nothing? Cannabis legalization outcomes among young adults in the United States. *Int J Drug Policy.* 2018;56:116-120.
80. Phillips E, Gazmararian J. Implications of prescription drug monitoring and medical cannabis legislation on opioid overdose mortality. *J Opioid Manag.* 2017;13(4):229-239.
81. Plunk AD, Agrawal A, Harrell PT, et al. The impact of adolescent exposure to medical marijuana laws on high school completion, college enrollment and college degree completion. *Drug Alcohol Depend.* 2016;168:320-327.
82. Pollini RA, Romano E, Johnson MB, Lacey JH. The impact of marijuana decriminalization on California drivers. *Drug Alcohol Depend.* 2015;150:135-140.
83. Powell D, Pacula RL, Jacobson M. Do medical marijuana laws reduce addictions and deaths related to pain killers? *J Health Econ.* 2018;58:29-42.
84. Prue B. Prevalence of reported peyote use 1985-2010 effects of the American Indian Religious Freedom Act of 1994. *Am J Addict.* 2014;23(2):156-161.
85. Ramirez A. Marijuana, other drugs, and alcohol use by drivers in Washington state. *Alcohol Clin Exp Res.* 2017;41:314A.
86. Reith I. Two plants are better than one? *Contemp Drug Probl.* 2015;42(4):259-273.
87. Rodriguez CE, Sheeder J, Metz TD. Marijuana use in pregnant teens before and after legalization. *Reprod Sci.* 2016;1:282A.
88. Rohda J, Smith K, Smith L, Jacobitz K, Kirschner R. Impact of recreational marijuana legalization on synthetic cannabinoid use. *Clin Toxicol.* 2017;55(7):780.
89. Rusby JC, Westling E, Crowley R, Light JM. Legalization of recreational marijuana and community sales policy in Oregon: impact on adolescent willingness and intent to use, parent use, and adolescent use. *Psychol Addict Behav.* 2018;32(1):84-92.
90. Sabia JJ, Swigert J, Young T. The effect of medical marijuana laws on body weight. *Health Econ.* 2017;26(1):6-34.
91. Santaella-Tenorio J, Mauro CM, Wall MM, et al. US traffic fatalities, 1985-2014, and their relationship to medical marijuana laws. *Am J Public Health.* 2017;107(2):336-342.
92. Schmidt LA, Jacobs LM, Spetz J. Young people's more permissive views about marijuana: local impact of state laws or national trend? *Am J Public Health.* 2016;106(8):1498-1503.
93. Sevigny EL, Pacula RL, Heaton P. The effects of medical marijuana laws on potency. *Int J Drug Policy.* 2014;25(2):308-319.

## Appendix C: Included Studies

94. Shah AB, Hayes CJ, Lakkad M, Martin BC. Impact of medical marijuana legalization on opioid use, chronic opioid use and high-risk opioid use. *Value Health*. 2018;21(S1):S247.
95. Shepard EM, Blackley PR. Medical marijuana and crime: further evidence from the western states. *J Drug Issues*. 2016;46(2):122-134.
96. Shi Y. Medical marijuana policies and hospitalizations related to marijuana and opioid pain reliever. *Drug Alcohol Depend*. 2017;173:144-150.
97. Sokoya M, Eagles J, Okland T, et al. Patterns of facial trauma before and after legalization of marijuana in Denver, Colorado: a joint study between two Denver hospitals. *Am J Emerg Med*. 2018;36(5):780-783.
98. Steinemann S, Galanis D, Nguyen T, Biffi W. Motor vehicle crash fatalities and undercompensated care associated with legalization of marijuana. *J Trauma Acute Care Surg*. 2018;85(3):566-571.
99. Stolzenberg L, D'Alessio SJ, Dariano D. The effect of medical cannabis laws on juvenile cannabis use. *Int J Drug Policy*. 2016;27:82-88.
100. Straub H, Drennan KJ, Pflugeisen B. Maternal marijuana use: a natural experiment from prohibition to access. *Am J Obstet Gynecol*. 2017;216(S1):S554-S555.
101. Suggs DL. A qualitative and quantitative analysis of the impact of Nebraska's decriminalization of marijuana. *Law Hum Behav*. 1981;5(1):45-71.
102. Ullman DF. The effect of medical marijuana on sickness absence. *Health Econ*. 2017;26(10):1322-1327.
103. Urfer S, Morton J, Beall V, Feldmann J, Gunesch J. Analysis of DELTA9-tetrahydrocannabinol driving under the influence of drugs cases in Colorado from January 2011 to February 2014. *J Anal Toxicol*. 2014;38(8):575-581.
104. Wagner J, Leonard J, Jensen J, et al. The impact of marijuana legalization on reversible cerebral vasoconstriction syndrome. *Neurology*. 2016;86(S16):115.
105. Wall MM, Mauro C, Hasin DS, et al. Prevalence of marijuana use does not differentially increase among youth after states pass medical marijuana laws: commentary on Stolzenberg et al. (2015) and reanalysis of US National Survey on Drug Use in Households data 2002-2011. *Int J Drug Policy*. 2016;29:9-13.
106. Wall MM, Poh E, Cerda M, Keyes KM, Galea S, Hasin DS. Adolescent marijuana use from 2002 to 2008: higher in states with medical marijuana laws, cause still unclear. *Ann Epidemiol*. 2011;21(9):714-716.
107. Wang GS, Davies SD, Halmo LS, Sass A, Mistry RD. Impact of marijuana legalization in Colorado on adolescent emergency and urgent care visits. *J Adolesc Health*. 2018;63(2):239-241.
108. Wang GS, Hall K, Vigil D, Banerji S, Monte A, VanDyke M. Marijuana and acute health care contacts in Colorado. *Prev Med*. 2017;104:24-30.
109. Wang GS, Le Lait MC, Deakyne SJ, Bronstein AC, Bajaj L, Roosevelt G. Unintentional pediatric exposures to marijuana in Colorado, 2009-2015. *JAMA Pediatr*. 2016;170(9):e160971.
110. Wen H, Hockenberry JM. Association of medical and adult-use marijuana laws with opioid prescribing for Medicaid enrollees. *JAMA Intern Med*. 2018;178(5):673-679.
111. Wen H, Hockenberry JM, Cummings JR. The effect of medical marijuana laws on adolescent and adult use of marijuana, alcohol, and other substances. *J Health Econ*. 2015;42:64-80.



## Appendix C: Included Studies

- 1  
2  
3  
4  
5  
6  
7  
8  
9  
10  
11  
12  
13  
14  
15  
16  
17  
18  
19  
20  
21  
22  
23  
24  
25  
26  
27  
28  
29  
30  
31  
32  
33  
34  
35  
36  
37  
38  
39  
40  
41  
42  
43  
44  
45  
46  
47  
48  
49  
50  
51  
52  
53  
54  
55  
56  
57  
58  
59  
60
112. Wen H, Hockenberry JM, Druss BG. The effect of medical marijuana laws on marijuana-related attitude and perception among us adolescents and young adults. *Prev Sci.* 2019;20(2):215-223.
  113. Williams AR, Santaella-Tenorio J, Mauro CM, Levin FR, Martins SS. Loose regulation of medical marijuana programs associated with higher rates of adult marijuana use but not cannabis use disorder. *Addiction.* 2017;112(11):1985-1991.
  114. Williams J, Bretteville-Jensen AL. Does liberalizing cannabis laws increase cannabis use? *J Health Econ.* 2014;36:20-32.

# Reporting checklist for systematic review and meta-analysis.

Based on the PRISMA guidelines.

## Instructions to authors

Complete this checklist by entering the page numbers from your manuscript where readers will find each of the items listed below.

Your article may not currently address all the items on the checklist. Please modify your text to include the missing information. If you are certain that an item does not apply, please write "n/a" and provide a short explanation.

Upload your completed checklist as an extra file when you submit to a journal.

In your methods section, say that you used the PRISMA reporting guidelines, and cite them as:

Moher D, Liberati A, Tetzlaff J, Altman DG, The PRISMA Group. Preferred Reporting Items for Systematic Reviews and Meta-Analyses: The PRISMA Statement

|                     | Reporting Item                                                                                                                                                                                                                                                                                                                | Page Number |
|---------------------|-------------------------------------------------------------------------------------------------------------------------------------------------------------------------------------------------------------------------------------------------------------------------------------------------------------------------------|-------------|
| <b>Title</b>        |                                                                                                                                                                                                                                                                                                                               |             |
|                     | <a href="#">#1</a> Identify the report as a systematic review, meta-analysis, or both.                                                                                                                                                                                                                                        | 1           |
| <b>Abstract</b>     |                                                                                                                                                                                                                                                                                                                               |             |
| Structured summary  | <a href="#">#2</a> Provide a structured summary including, as applicable: background; objectives; data sources; study eligibility criteria, participants, and interventions; study appraisal and synthesis methods; results; limitations; conclusions and implications of key findings; systematic review registration number | 2           |
| <b>Introduction</b> |                                                                                                                                                                                                                                                                                                                               |             |
| Rationale           | <a href="#">#3</a> Describe the rationale for the review in the context of what is already known.                                                                                                                                                                                                                             | 4           |
| Objectives          | <a href="#">#4</a> Provide an explicit statement of questions being addressed with reference to participants, interventions, comparisons, outcomes, and study design (PICOS).                                                                                                                                                 | 5           |

## 1 **Methods**

|    |                 |                     |                                                                                 |
|----|-----------------|---------------------|---------------------------------------------------------------------------------|
| 2  |                 |                     |                                                                                 |
| 3  | Protocol and    | <a href="#">#5</a>  | Indicate if a review protocol exists, if and where it can be                    |
| 4  | registration    |                     | accessed (e.g., Web address) and, if available, provide                         |
| 5  |                 |                     | registration information including the registration number.                     |
| 6  |                 |                     |                                                                                 |
| 7  |                 |                     |                                                                                 |
| 8  | Eligibility     | <a href="#">#6</a>  | Specify study characteristics (e.g., PICOS, length of follow-up)                |
| 9  | criteria        |                     | and report characteristics (e.g., years considered, language,                   |
| 10 |                 |                     | publication status) used as criteria for eligibility, giving rational           |
| 11 |                 |                     |                                                                                 |
| 12 |                 |                     |                                                                                 |
| 13 | Information     | <a href="#">#7</a>  | Describe all information sources in the search (e.g., databases                 |
| 14 | sources         |                     | with dates of coverage, contact with study authors to identify                  |
| 15 |                 |                     | additional studies) and date last searched.                                     |
| 16 |                 |                     |                                                                                 |
| 17 |                 |                     |                                                                                 |
| 18 | Search          | <a href="#">#8</a>  | Present full electronic search strategy for at least one database,              |
| 19 |                 |                     | including any limits used, such that it could be repeated.                      |
| 20 |                 |                     |                                                                                 |
| 21 |                 |                     |                                                                                 |
| 22 |                 |                     |                                                                                 |
| 23 | Study selection | <a href="#">#9</a>  | State the process for selecting studies (i.e., for screening, for               |
| 24 |                 |                     | determining eligibility, for inclusion in the systematic review,                |
| 25 |                 |                     | and, if applicable, for inclusion in the meta-analysis).                        |
| 26 |                 |                     |                                                                                 |
| 27 |                 |                     |                                                                                 |
| 28 | Data collection | <a href="#">#10</a> | Describe the method of data extraction from reports (e.g., piloted              |
| 29 | process         |                     | forms, independently by two reviewers) and any processes for                    |
| 30 |                 |                     | obtaining and confirming data from investigators.                               |
| 31 |                 |                     |                                                                                 |
| 32 |                 |                     |                                                                                 |
| 33 | Data items      | <a href="#">#11</a> | List and define all variables for which data were sought (e.g.,                 |
| 34 |                 |                     | PICOS, funding sources), and any assumptions and                                |
| 35 |                 |                     | simplifications made.                                                           |
| 36 |                 |                     |                                                                                 |
| 37 |                 |                     |                                                                                 |
| 38 | Risk of bias in | <a href="#">#12</a> | Describe methods used for assessing risk of bias in individual                  |
| 39 | individual      |                     | studies (including specification of whether this was done at the                |
| 40 | studies         |                     | study or outcome level, or both), and how this information is to                |
| 41 |                 |                     | be used in any data synthesis.                                                  |
| 42 |                 |                     |                                                                                 |
| 43 |                 |                     |                                                                                 |
| 44 |                 |                     |                                                                                 |
| 45 | Summary         | <a href="#">#13</a> | State the principal summary measures (e.g., risk ratio, difference              |
| 46 | measures        |                     | in means).                                                                      |
| 47 |                 |                     |                                                                                 |
| 48 |                 |                     |                                                                                 |
| 49 | Planned methods | <a href="#">#14</a> | Describe the methods of handling data and combining results of                  |
| 50 | of analysis     |                     | studies, if done, including measures of consistency (e.g., I <sup>2</sup> ) for |
| 51 |                 |                     | each meta-analysis.                                                             |
| 52 |                 |                     |                                                                                 |
| 53 |                 |                     |                                                                                 |
| 54 |                 |                     |                                                                                 |
| 55 | Risk of bias    | <a href="#">#15</a> | Specify any assessment of risk of bias that may affect the                      |
| 56 | across studies  |                     | cumulative evidence (e.g., publication bias, selective reporting                |
| 57 |                 |                     | within studies).                                                                |
| 58 |                 |                     |                                                                                 |
| 59 |                 |                     |                                                                                 |
| 60 |                 |                     |                                                                                 |

|    |                   |                     |                                                                      |               |
|----|-------------------|---------------------|----------------------------------------------------------------------|---------------|
| 1  | Additional        | <a href="#">#16</a> | Describe methods of additional analyses (e.g., sensitivity or        | N/A           |
| 2  | analyses          |                     | subgroup analyses, meta-regression), if done, indicating which       |               |
| 3  |                   |                     | were pre-specified.                                                  |               |
| 4  |                   |                     |                                                                      |               |
| 5  |                   |                     |                                                                      |               |
| 6  | <b>Results</b>    |                     |                                                                      |               |
| 7  |                   |                     |                                                                      |               |
| 8  | Study selection   | <a href="#">#17</a> | Give numbers of studies screened, assessed for eligibility, and      | 7-8, Figure 1 |
| 9  |                   |                     | included in the review, with reasons for exclusions at each stage,   |               |
| 10 |                   |                     | ideally with a <a href="#">flow diagram</a> .                        |               |
| 11 |                   |                     |                                                                      |               |
| 12 |                   |                     |                                                                      |               |
| 13 |                   |                     |                                                                      |               |
| 14 | Study             | <a href="#">#18</a> | For each study, present characteristics for which data were          | Supplementary |
| 15 | characteristics   |                     | extracted (e.g., study size, PICOS, follow-up period) and provide    | Table 1       |
| 16 |                   |                     | the citation.                                                        |               |
| 17 |                   |                     |                                                                      |               |
| 18 |                   |                     |                                                                      |               |
| 19 | Risk of bias      | <a href="#">#19</a> | Present data on risk of bias of each study and, if available, any    | Supplementary |
| 20 | within studies    |                     | outcome-level assessment (see Item 12).                              | Table 1       |
| 21 |                   |                     |                                                                      |               |
| 22 |                   |                     |                                                                      |               |
| 23 | Results of        | <a href="#">#20</a> | For all outcomes considered (benefits and harms), present, for       | Supplementary |
| 24 | individual        |                     | each study: (a) simple summary data for each intervention group      | Table 1       |
| 25 | studies           |                     | and (b) effect estimates and confidence intervals, ideally with a    |               |
| 26 |                   |                     | forest plot.                                                         |               |
| 27 |                   |                     |                                                                      |               |
| 28 |                   |                     |                                                                      |               |
| 29 |                   |                     |                                                                      |               |
| 30 | Synthesis of      | <a href="#">#21</a> | Present the main results of the review. If meta-analyses are done,   | 9-12          |
| 31 | results           |                     | include for each, confidence intervals and measures of               |               |
| 32 |                   |                     | consistency.                                                         |               |
| 33 |                   |                     |                                                                      |               |
| 34 |                   |                     |                                                                      |               |
| 35 | Risk of bias      | <a href="#">#22</a> | Present results of any assessment of risk of bias across studies     | N/A           |
| 36 | across studies    |                     | (see Item 15).                                                       |               |
| 37 |                   |                     |                                                                      |               |
| 38 |                   |                     |                                                                      |               |
| 39 | Additional        | <a href="#">#23</a> | Give results of additional analyses, if done (e.g., sensitivity or   | N/A           |
| 40 | analysis          |                     | subgroup analyses, meta-regression [see Item 16]).                   |               |
| 41 |                   |                     |                                                                      |               |
| 42 |                   |                     |                                                                      |               |
| 43 | <b>Discussion</b> |                     |                                                                      |               |
| 44 |                   |                     |                                                                      |               |
| 45 | Summary of        | <a href="#">#24</a> | Summarize the main findings, including the strength of evidence      | 12-14         |
| 46 | Evidence          |                     | for each main outcome; consider their relevance to key groups        |               |
| 47 |                   |                     | (e.g., health care providers, users, and policy makers               |               |
| 48 |                   |                     |                                                                      |               |
| 49 |                   |                     |                                                                      |               |
| 50 | Limitations       | <a href="#">#25</a> | Discuss limitations at study and outcome level (e.g., risk of bias), | 14-15         |
| 51 |                   |                     | and at review level (e.g., incomplete retrieval of identified        |               |
| 52 |                   |                     | research, reporting bias).                                           |               |
| 53 |                   |                     |                                                                      |               |
| 54 |                   |                     |                                                                      |               |
| 55 |                   |                     |                                                                      |               |
| 56 | Conclusions       | <a href="#">#26</a> | Provide a general interpretation of the results in the context of    | 15            |
| 57 |                   |                     | other evidence, and implications for future research.                |               |
| 58 |                   |                     |                                                                      |               |
| 59 |                   |                     |                                                                      |               |
| 60 |                   |                     |                                                                      |               |

## Funding

Funding [#27](#) Describe sources of funding or other support (e.g., supply of data) for the systematic review; role of funders for the systematic review. 16

### Notes:

- 17: 7-8, Figure 1
- 18: Supplementary Table 1
- 19: Supplementary Table 1
- 20: Supplementary Table 1 The PRISMA checklist is distributed under the terms of the Creative Commons Attribution License CC-BY. This checklist was completed on 19. October 2019 using <https://www.goodreports.org/>, a tool made by the [EQUATOR Network](#) in collaboration with [Penelope.ai](#)
