# Supplementary material for: Impact evaluations of drug decriminalisation and legal regulation on drug use, health and social harms: a systematic review
Source: PubMed Central journal article supplement — BMJ Open. 2020 Sep 21;10(9):e035148. doi: 10.1136/bmjopen-2019-035148 (PMC7507857; doi:10.1136/bmjopen-2019-035148), 2020-09-21
Supplement: bmjopen-2019-035148supp002.pdf [file bmjopen-2019-035148supp002.pdf]

Supplementary Table 1. Included Studies

|    | Reference         | Setting<br>Legal change                                                               | Study design,<br>dates<br>[Comparison<br>group or<br>condition]                                                                            | Sampling<br>approach<br>Sample size                                                                                         | Outcomes                                                                                                                                                               | Effects                                                                                                                                                                                                                                                                                         | Quality |
|----|-------------------|---------------------------------------------------------------------------------------|--------------------------------------------------------------------------------------------------------------------------------------------|-----------------------------------------------------------------------------------------------------------------------------|------------------------------------------------------------------------------------------------------------------------------------------------------------------------|-------------------------------------------------------------------------------------------------------------------------------------------------------------------------------------------------------------------------------------------------------------------------------------------------|---------|
| 1. | Adam 2017         | Belgium,<br>Portugal<br><br>Cannabis<br>decriminalization                             | Controlled<br>before-and-<br>after, 1996-2010<br><br>[Austria,<br>Germany,<br>Greece, Ireland,<br>Italy,<br>Netherlands,<br>Spain, Sweden] | Convenience<br>sampling<br><br>89 treatment<br>units                                                                        | <i>Addiction treatment<br/>utilization</i> : # of first-time drug<br>treatment clients reporting<br>cannabis as primary<br>indication, per reporting<br>treatment unit | No significant effect of<br>decriminalization. $B = 2.66$ , $SE=8.72$ ,<br>$P=0.770$                                                                                                                                                                                                            | 13      |
|    |                   |                                                                                       |                                                                                                                                            |                                                                                                                             | <i>Prevalence of use,<br/>decriminalized/regulated<br/>drug(s)</i> : past-year cannabis<br>use                                                                         | No significant effect of<br>decriminalization. $B = 1.88$ , $SE=1.77$ ,<br>$P=0.310$                                                                                                                                                                                                            |         |
| 2. | Allshouse<br>2016 | United States<br><br>Legal regulation<br>of cannabis for<br>recreational use<br>(RCL) | Repeated cross-<br>sectional study,<br>2013; 2014                                                                                          | Population-<br>based;<br>Admin<br>record data<br><br>N=743                                                                  | <i>Prevalence of use,<br/>decriminalized/regulated<br/>drug(s)</i> : self-reported cannabis<br>use during pregnancy                                                    | No significant effect of RCL (from 4.5%<br>to<br>7.5%, $p=0.06$ )                                                                                                                                                                                                                               | A<br>*  |
|    |                   |                                                                                       |                                                                                                                                            |                                                                                                                             | <i>Prevalence of use,<br/>decriminalized/regulated<br/>drug(s)</i> : cannabis-positive<br>urine screen during pregnancy                                                | No significant effect of RCL. Adjusted<br>prevalence difference = 0.03, $P=0.99$ .                                                                                                                                                                                                              |         |
| 3. | Anderson<br>2013  | United States<br><br>Legal regulation<br>of cannabis for<br>medical use<br>(MCL)      | Repeated cross-<br>sectional study,<br>1990-2010                                                                                           | Convenience<br>sampling<br><br><i>Study A</i> :<br>8,271<br>cannabis<br>purchases<br><i>Study B</i> :<br>1071<br>fatalities | <i>Price of drugs</i> : median price<br>of cannabis in state and year                                                                                                  | 9.8% decrease in price of high-quality<br>cannabis, controlling for state-specific<br>time trends. Lagged models indicate<br>price reductions not significant until 4 <sup>th</sup><br>year after MCL. Effects on price of low-<br>quality cannabis largely statistically<br>insignificant.     | 11      |
|    |                   |                                                                                       |                                                                                                                                            |                                                                                                                             | <i>Accidents, motor vehicle</i> :<br>traffic fatality outcomes per<br>100,000; primary outcome is<br>total fatalities.                                                 | No significant change in fatalities,<br>controlling for state-specific time trends.<br>In lagged models, MCL associated with<br>8-13% fatality reductions in years 1-4,<br>with reduction attenuated and no longer<br>significant after 5 years, controlling for<br>state-specific time trends. |         |

|    |                |                                                                     |                                                                                         |                                                                   |                                                                                                                                          |                                                                                                                                                                                                       |    |
|----|----------------|---------------------------------------------------------------------|-----------------------------------------------------------------------------------------|-------------------------------------------------------------------|------------------------------------------------------------------------------------------------------------------------------------------|-------------------------------------------------------------------------------------------------------------------------------------------------------------------------------------------------------|----|
| 4. | Anderson 2014  | United States<br>Legal regulation of cannabis for medical use (MCL) | Controlled before-and-after study, 1990-2007<br><br>[States that did not implement MCL] | Population-based;<br>Admin record data                            | <i>Mental health conditions, suicide, or self-harm</i> : annual suicide rates per 100,000 among individuals 15+                          | No difference in suicide rate overall. Reduction among males, (log) rate difference = -0.047* (95% CI: -0.089, -0.005). By age, significant reductions among males from 20-39 and among females >=60. | 16 |
| 5. | Anderson 2018  | United States<br>Legal regulation of cannabis for medical use (MCL) | Repeated cross-sectional study, 1992-2015                                               | Population-based;<br>Admin record data<br><br>N= 1224 state-years | <i>Accidents, other</i> : Workplace fatalities by state from the Bureau of Labor Statistics                                              | No difference in fatality rate overall. Reduction among those aged 25-44 only. Adjusted rate ratio = 0.805 (95% CI: 0.662, 0.979).                                                                    | 15 |
| 6. | Anderson 2015  | United States<br>Legal regulation of cannabis for medical use (MCL) | Repeated cross-sectional study, 1993-2011                                               | Population-based;<br>School-based survey<br><br>N=862,695         | <i>Prevalence of use, decriminalized/regulated drug(s)</i> : past 30 day use                                                             | No significant effect of MCL: % difference, combined national and state YRBS = -0.007, SE=0.011, p>0.05.                                                                                              | 15 |
|    |                |                                                                     |                                                                                         |                                                                   | <i>Frequency of use, decriminalized/regulated drug(s)</i> : used ≥ 10 times in past 30 days                                              | No significant effect of MCL: % difference, combined national and state YRBS = -0.004, SE=0.006, p>0.05.                                                                                              |    |
|    |                |                                                                     |                                                                                         |                                                                   | <i>Actual availability of decriminalized/regulated drug(s)</i> : offered, sold, or given an illegal drug on school property in past year | MCL associated with reduction in availability, % difference, combined national and state YRBS = -0.020, SE=0.008, p<0.05;                                                                             |    |
| 7. | Arredondo 2018 | Mexico<br>Decriminalization of all drugs                            | Repeated cross-sectional study, 2009-2014                                               | Population-based;<br>Admin record data                            | <i>Criminal justice involvement</i> : Monthly number of drug possession arrests per precinct.                                            | Decriminalization law not associated with arrests, Beta for ln(possession arrests)=0.187, SE=0.151, p>0.05.                                                                                           | 14 |
|    |                |                                                                     |                                                                                         |                                                                   | <i>Crime (non-drug)</i> : Violent crime arrests (injuries, robbery, homicides)                                                           | Law not associated with arrests, b=0.001, SE=0.090, p>0.05.                                                                                                                                           |    |

|     |                |                                                                                              |                                                                                           |                                                               |                                                                                                              |                                                                                                                                                                                             |     |
|-----|----------------|----------------------------------------------------------------------------------------------|-------------------------------------------------------------------------------------------|---------------------------------------------------------------|--------------------------------------------------------------------------------------------------------------|---------------------------------------------------------------------------------------------------------------------------------------------------------------------------------------------|-----|
|     |                |                                                                                              |                                                                                           |                                                               | <i>Crime (non-drug):</i><br>Non-violent arrests (theft, possession of stolen car)                            | Law not associated with arrests, b=-0.043, SE=0.071, p>0.05.                                                                                                                                |     |
| 8.  | Aydelotte 2017 | United States<br><br>Legal regulation of cannabis for recreational use (RCL)                 | Controlled before-and-after study, 2009-2015<br><br>[8 similar states without MCL or RCL] | Population-based;<br>Admin record data<br><br>N=60,737        | <i>Accidents, motor vehicle:</i><br>Annual number of motor vehicle crash fatalities                          | RCL not associated with crash fatalities, adjusted difference in difference coefficient: +0.2 (95% CI: -0.4, +0.9).                                                                         | 15  |
| 9.  | Bachhuber 2014 | United States<br><br>Legal regulation of cannabis for medical use (MCL)                      | Interrupted time series study, 1999-2010                                                  | Population-based;<br>Admin record data                        | <i>Overdose or poisoning, other drug:</i> opioid analgesic overdose mortality rate                           | MCL associated with reduced mortality, adjusted percentage change in annual rate=-24.8% (95% CI: -37.5, -9.5), p = .003.                                                                    | 16  |
| 10. | Banerji 2017   | United States<br><br>Legal regulation of cannabis for recreational use                       | Repeated cross-sectional study, 2011-2015                                                 | Population-based;<br>Admin record data<br><br>N=777 exposures | <i>Overdose or poisoning, decriminalized/regulated drug:</i> cannabis calls to poison control center         | Apparent increase (from 86 in 2011 to 231 in 2015); no statistical tests reported.                                                                                                          | A * |
|     |                |                                                                                              |                                                                                           |                                                               | <i>Overdose or poisoning, other drug:</i> synthetic cannabinoid calls to poison control center               | Apparent decrease (100 in 2013 and 17 in 2014); no statistical tests reported.                                                                                                              |     |
| 11. | Bell 2015      | United States<br><br>Legal regulation of cannabis for medical use (MCL) and recreational use | Repeated cross-sectional study, 2008-2014                                                 | Population-based;<br>Admin record data<br>N=29                | <i>Accidents, other:</i><br>hydrocarbon burns referred to the University of Colorado Hospital                | Before MCL (Jan 2008-Aug 2009): 0 cases<br>During MCL (Oct 2009-Dec 2013): 19 cases<br>During recreational legalization (Dec 2013-Aug 2014): 12 cases<br><br>No statistical tests reported. | 11  |
| 12. | Bjordal 2015   | United States<br><br>Legal regulation of cannabis for recreational use                       | Repeated cross-sectional study, 2013-2014                                                 | Population-based;<br>Admin record data<br><br>N=245 exposures | <i>Overdose or poisoning, decriminalized/regulated drug:</i> Cannabis calls to poison control center (p.694) | Apparent increase (from 158 in 2013 to 245 in 2014); no statistical tests reported.                                                                                                         | A * |

|     |               |                                                                         |                                                                                                              |                                                                                                |                                                                                                                                                                                                                                                                                                                                                                                                               |                                                                                                                                                                                                                                                                                                                                                                    |    |
|-----|---------------|-------------------------------------------------------------------------|--------------------------------------------------------------------------------------------------------------|------------------------------------------------------------------------------------------------|---------------------------------------------------------------------------------------------------------------------------------------------------------------------------------------------------------------------------------------------------------------------------------------------------------------------------------------------------------------------------------------------------------------|--------------------------------------------------------------------------------------------------------------------------------------------------------------------------------------------------------------------------------------------------------------------------------------------------------------------------------------------------------------------|----|
| 13. | Blachly 1976  | United States<br><br>Cannabis decriminalization                         | Uncontrolled before-and-after study, 1970; 1975                                                              | Convenience sampling<br><br>N=627 admissions                                                   | <i>Health services utilization</i> : % of drug abuse admissions to Dammasch State Hospital due to cannabis                                                                                                                                                                                                                                                                                                    | Prevalence from 6.7% (1970) to 2.5% (1975); no statistical tests reported.                                                                                                                                                                                                                                                                                         | 8  |
| 14. | Boyle 2014    | United States<br><br>Cannabis decriminalization                         | Repeated cross-sectional study, 2011-2013                                                                    | Population-based;<br>Admin record data<br><br>N=11 incidents                                   | <i>Accidents, other</i> : explosions of gases related to hash oil manufacturing                                                                                                                                                                                                                                                                                                                               | Two events in 2 years prior, nine events in 7 months post-decriminalization (before legal sales); no statistical tests reported.                                                                                                                                                                                                                                   | A* |
| 15. | Bradford 2018 | United States<br><br>Legal regulation of cannabis for medical use (MCL) | Repeated cross-sectional study, 2010-2015                                                                    | Population-based;<br>Admin record data<br><br>N=132.6 million physician-drug-year observations | <i>Prescription drug use</i> : total number of daily opioid dose prescriptions filled (in millions)                                                                                                                                                                                                                                                                                                           | MCL associated with fewer daily doses filled in states with active dispensaries (-3.742 million, 95% CI: -6.289, -1.194) and in states with home cultivation (-1.792 million, 95% CI: -3.532, -0.052). Results also varied by type of opioid.                                                                                                                      | 18 |
| 16. | Bradford 2016 | United States<br><br>Legal regulation of cannabis for medical use (MCL) | Controlled before-and-after study, 2010-2013<br><br>[States without a medical marijuana law at a given time] | Population-based;<br>Admin record data<br><br>N= 588,808-2,496,608                             | <i>Prescription drug use</i> : among Medicaid Part D enrollees, average daily doses filled annually per physician for FDA-approved drugs treating conditions that cannabis may be used to treat (anxiety, depression, glaucoma, nausea, pain, psychosis, seizures, sleep disorders, spasticity)<br><br><i>Costs, health care</i> : estimated annual change in Medicaid Part D spending (program and enrollee) | MCL associated with statistically significant (p<0.05) reductions in daily doses filled for 7 of 9 conditions (difference-in-difference coefficients from -265 daily doses for depression to -1826 for pain), no significant effects for glaucoma or spasticity.<br><br>Estimated prescription drug cost savings from 2010-2013 attributed to MCL = \$515,194,125. | 17 |

|     |                     |                                                                         |                                                                                             |                                                                                        |                                                                                                                                                                                                                 |                                                                                                                                                                                                                                                                                  |    |
|-----|---------------------|-------------------------------------------------------------------------|---------------------------------------------------------------------------------------------|----------------------------------------------------------------------------------------|-----------------------------------------------------------------------------------------------------------------------------------------------------------------------------------------------------------------|----------------------------------------------------------------------------------------------------------------------------------------------------------------------------------------------------------------------------------------------------------------------------------|----|
| 17. | Bradford 2017       | United States<br><br>Legal regulation of cannabis for medical use (MCL) | Controlled before-and-after study, 2007-2014<br><br>[States without MCL in a given quarter] | Population-based;<br>Admin record data                                                 | <i>Prescription drug use:</i> average number of daily prescription drug doses dispensed per fee-for-service Medicaid beneficiary for FDA-approved drugs treating conditions that cannabis may be used to treat. | MCL associated with statistically significant ( $p < 0.05$ ) reductions in daily doses per beneficiary for 5 of 9 conditions (depression, nausea, pain, psychosis, and seizures). Estimated proportion reductions in dispensed doses ranged from 11% for pain to 17% for nausea. | 17 |
|     |                     |                                                                         |                                                                                             |                                                                                        | <i>Costs, health care:</i> estimated annual change in Medicaid fee-for-service spending on prescription drugs with medical cannabis indications                                                                 | Estimated Medicaid fee-for-service prescription drug cost savings from 2007-2014 attributed to MCL = 2,694.1 million                                                                                                                                                             |    |
| 18. | Brooks-Russell 2019 | United States<br><br>Legal regulation of cannabis for recreational use  | Repeated cross-sectional study, 2013-2015                                                   | Population-based;<br>School-based survey<br><br>N = 26,019 (2013)<br>N = 15,970 (2015) | <i>Prevalence of use, decriminalized/regulated drug(s):</i> lifetime use; past 30-day use.                                                                                                                      | No significant change in lifetime or past 30-day use following legal regulation.                                                                                                                                                                                                 | 15 |
|     |                     |                                                                         |                                                                                             |                                                                                        | <i>Prevalence of use, other drugs or alcohol:</i> past 30-day use of cigarettes; past 30-day use alcohol; lifetime non-medical prescription drug use; lifetime cocaine use.                                     | Decrease in past 30-day cigarette use from 2013 to 2015 (12.1 to 8.6%, $p < 0.01$ ). No significant changes in other drug or alcohol use.                                                                                                                                        |    |
|     |                     |                                                                         |                                                                                             |                                                                                        | <i>Perceived harmfulness of decriminalized/regulated drug(s):</i> high vs. low perceived accessibility, wrongfulness, parental disapproval, and harmfulness.                                                    | Decrease in high perceived harmfulness (52.9% to 47.7%, $p < 0.01$ ). No significant changes in other perceptions.                                                                                                                                                               |    |
|     |                     |                                                                         |                                                                                             |                                                                                        | <i>Frequency of use, decriminalized/legalized drug(s):</i> >20 occasions of use in past 30 days, among those who reported past 30-day use.                                                                      | Decrease in frequent use among past-30-day users (33.2% to 26.8%, $p < 0.01$ ).                                                                                                                                                                                                  |    |
|     |                     |                                                                         |                                                                                             |                                                                                        | <i>Prevalence of use, decriminalized/regulated drug(s):</i> use on school property, among those who reported past 30-day use.                                                                                   | Decrease in use on school property among past-30-day users (5.7% to 4.4%, $p = 0.03$ ).                                                                                                                                                                                          |    |

|     |                 |                                                                          |                                                                          |                                                             |                                                                                                   |                                                                                                                                                                                                                                                                                                                                                           |     |
|-----|-----------------|--------------------------------------------------------------------------|--------------------------------------------------------------------------|-------------------------------------------------------------|---------------------------------------------------------------------------------------------------|-----------------------------------------------------------------------------------------------------------------------------------------------------------------------------------------------------------------------------------------------------------------------------------------------------------------------------------------------------------|-----|
| 19. | Calcaterra 2018 | United States<br>Legal regulation of cannabis for recreational use (RCL) | Interrupted time series study, 2009-2015                                 | Population-based;<br>Admin record data<br><br>N=370,612     | <i>Health services utilization: cannabis-related hospitalizations</i>                             | RCL associated with an increase in hospitalizations: adjusted annual rates of inpatient and emergent hospitalizations were 2.4 and 4.3 times higher in 2015 as compared to 2009 (p<0.001). A reduced segmented regression model shows a significant increase in slope post-RCL (b= 1.835, SE=0.218, p< 0.0001).                                           | A * |
| 20. | Cassidy 2015    | United States<br>Legal regulation of cannabis for recreational use       | Uncontrolled before-and-after study, 2008-2014                           | Convenience sampling<br><br>N=13,945                        | <i>Prevalence of use, decriminalized/regulated drug(s): among substance use treatment clients</i> | Increase from 21.3% in 2008 to 32.8% in 2014 (p<0.001).                                                                                                                                                                                                                                                                                                   | A * |
|     |                 |                                                                          |                                                                          |                                                             | <i>Prevalence of use, decriminalized/regulated drug(s): past-year initiation</i>                  | No significant change in past-year initiation.                                                                                                                                                                                                                                                                                                            |     |
| 21. | Cerde 2018      | United States<br>Legal regulation of cannabis for medical use (MCL)      | Controlled before-and-after study, 1991-2015<br><br>[States without MCL] | Population-based;<br>School-based survey<br><br>N=1,179,372 | <i>Prevalence of use, decriminalized/regulated drug(s): past 30-day use</i>                       | Decrease in 8 <sup>th</sup> grade (aOR=0.72; 95% CI: 0.62, 0.84). No significant changes in 10 <sup>th</sup> or 12 <sup>th</sup> .                                                                                                                                                                                                                        | 18  |
|     |                 |                                                                          |                                                                          |                                                             | <i>Prevalence of use, other drugs or alcohol: binge drinking in past two weeks</i>                | Decrease in 8 <sup>th</sup> grade (aOR=0.72; 95% CI: 0.65, 0.79). No significant changes in 10 <sup>th</sup> or 12 <sup>th</sup> .                                                                                                                                                                                                                        |     |
|     |                 |                                                                          |                                                                          |                                                             | <i>Prevalence of use, other drugs or alcohol: past 30-day cigarette use</i>                       | Decrease in 8 <sup>th</sup> grade (aOR=0.74; 95% CI: 0.66, 0.82) and increase in 12 <sup>th</sup> grade (aOR=1.17; 95% CI: 1.06, 1.29).                                                                                                                                                                                                                   |     |
|     |                 |                                                                          |                                                                          |                                                             | <i>Prevalence of use, other drugs or alcohol: past 30-day non-medical prescription drug use</i>   | Decrease in non-medical prescription opioid use in 8 <sup>th</sup> grade (aOR=0.43; 95% CI: 0.36, 0.52) and increase in 12 <sup>th</sup> grade (aOR=1.42; 95% CI: 1.21, 1.66).<br>Decrease in prescription amphetamine use (aOR=0.71; 95% CI: 0.63, 0.81) and prescription tranquilizer use (aOR=0.83; 95% CI: 0.71, 0.98) in 8 <sup>th</sup> grade only. |     |
|     |                 |                                                                          |                                                                          |                                                             | <i>Prevalence of use, other drugs or alcohol: past 30-day non-cannabis illicit drug use</i>       | Decrease in 8 <sup>th</sup> grade only (aOR=0.77; 95% CI: 0.69, 0.86).                                                                                                                                                                                                                                                                                    |     |

|     |              |                                                                              |                                                                                                            |                                                                   |                                                                                                                                               |                                                                                                                                                                                                                                     |    |
|-----|--------------|------------------------------------------------------------------------------|------------------------------------------------------------------------------------------------------------|-------------------------------------------------------------------|-----------------------------------------------------------------------------------------------------------------------------------------------|-------------------------------------------------------------------------------------------------------------------------------------------------------------------------------------------------------------------------------------|----|
| 22. | Cerde 2017   | United States<br><br>Legal regulation of cannabis for recreational use (RCL) | Controlled before-and-after study, 2010-2015                                                               | Population-based;<br>School-based survey<br><br>N=253,902         | <i>Prevalence of use, decriminalized/regulated drug(s):</i> past 30-day use                                                                   | Increase in 8 <sup>th</sup> and 10 <sup>th</sup> grade in Washington but not Colorado (difference-in-difference WA vs. non-RCL= 3.2% in 8 <sup>th</sup> grade, p=0.03; 5.0% in 10 <sup>th</sup> , p=0.01).                          | 18 |
|     |              |                                                                              |                                                                                                            |                                                                   | <i>Perceived harmfulness of decriminalized/regulated drug(s):</i> great or moderate vs. low or no risk                                        | Decreased perceived harmfulness in 8 <sup>th</sup> and 10 <sup>th</sup> grade in Washington but not Colorado (difference-in-difference WA vs. non-RCL= -9.3% in 8 <sup>th</sup> grade, p=0.01; -9.0% in 10 <sup>th</sup> , p=0.02). |    |
| 23. | Cervený 2017 | Czech Republic<br><br>Cannabis decriminalization                             | Repeated cross-sectional study, 2008; 2012                                                                 | Population-based;<br>Household survey<br>N=1524                   | <i>Age of first use, decriminalized/regulated drug</i>                                                                                        | No significant effect of decriminalization on hazard of initiation.                                                                                                                                                                 | 13 |
| 24. | Choo 2014    | United States<br><br>Legal regulation of cannabis for medical use (MCL)      | Controlled before-and-after study, 1991-2011<br><br>[Matched to state in geographic proximity without MCL] | Population-based;<br>School-based survey<br><br>N=11,703,100      | <i>Prevalence of use, decriminalized/regulated drug(s):</i> past 30-day use                                                                   | No significant effect of MCL.                                                                                                                                                                                                       | 16 |
| 25. | Chu 2014     | United States<br><br>Legal regulation of cannabis for medical use (MCL)      | Controlled before-and-after study, 1988-2008<br><br>[Non-MCL state years]                                  | Population-based;<br>Admin record data<br><br>N=12,157 city-years | <i>Criminal justice involvement:</i> adult male cannabis possession arrest rates                                                              | No significant effect of MCL.                                                                                                                                                                                                       | 15 |
|     |              |                                                                              |                                                                                                            |                                                                   | <i>Criminal justice involvement:</i> ratio of cannabis possession arrests to all arrests among adult males                                    | MCL associated with 9.3-12.1% increase in ratio of cannabis to non-cannabis arrests.                                                                                                                                                |    |
|     |              |                                                                              |                                                                                                            |                                                                   | <i>Addiction treatment utilization:</i> ratio of cannabis-related to all treatment admissions among adult male non-criminal justice referrals | MCL associated with 9.1-10.5% increase in ratio of cannabis to non-cannabis admissions.                                                                                                                                             |    |

|     |               |                                                                         |                                                              |                                                                   |                                                                                                                                                                                                                |                                                                                                                                                                                    |    |
|-----|---------------|-------------------------------------------------------------------------|--------------------------------------------------------------|-------------------------------------------------------------------|----------------------------------------------------------------------------------------------------------------------------------------------------------------------------------------------------------------|------------------------------------------------------------------------------------------------------------------------------------------------------------------------------------|----|
| 26. | Couper 2014   | United States<br><br>Cannabis decriminalization                         | Repeated cross-sectional study, 2009-2013                    | Convenience sampling<br><br>N=25,719                              | <i>Driving under the influence or with detectable concentration, decriminalized/regulated drug(s):</i> prevalence of THC in blood toxicology results from suspected impaired driving cases in Washington State | Increased prevalence of active THC after decriminalization (24.9% vs. 19.1%, $p<0.05$ ).                                                                                           | 9  |
| 27. | Donnelly 1995 | Australia<br><br>Cannabis decriminalization                             | Repeated cross-sectional study, 1985-1993                    | Population-based;<br>Household survey<br><br>N= 2257 to 3500      | <i>Prevalence of use, decriminalized/regulated drug(s):</i> lifetime cannabis use                                                                                                                              | No significant interaction between survey year and state: lifetime use did not increase at a significantly greater rate in South Australia (decriminalized).                       | 15 |
|     |               |                                                                         |                                                              |                                                                   | <i>Perceived availability of decriminalized/regulated drug(s):</i> been offered cannabis                                                                                                                       | No significant interaction between survey year and state.                                                                                                                          |    |
|     |               |                                                                         |                                                              |                                                                   | <i>Attitudes towards use, decriminalized/regulated drug(s):</i> would take cannabis if offered by a trusted friend                                                                                             | Proportion reporting willingness to try increased from 10% in 1985 to 18% in 1991 in South Australia, significant positive interaction between survey year and state ( $p<0.05$ ). |    |
|     |               |                                                                         |                                                              |                                                                   | <i>Prevalence of use, decriminalized/regulated drug(s):</i> weekly use of cannabis                                                                                                                             | No significant interaction between survey year and state.                                                                                                                          |    |
| 28. | Donnelly 2000 | Australia<br><br>Cannabis decriminalization                             | Repeated cross-sectional study, 1985; 1988; 1991; 1993; 1995 | Population-based;<br>Household survey                             | <i>Prevalence of use, decriminalized/regulated drug(s):</i> lifetime use                                                                                                                                       | Greater increase in lifetime use in South Australia (decriminalized) than the rest of Australia (test for trend, $p<0.05$ ).                                                       | 11 |
|     |               |                                                                         |                                                              |                                                                   | <i>Prevalence of use, decriminalized/regulated drug(s):</i> weekly use                                                                                                                                         | Rate of change for South Australia not significantly different from rest of the country.                                                                                           |    |
| 29. | Dutra 2018    | United States<br><br>Legal regulation of cannabis for medical use (MCL) | Repeated cross-sectional study, 2008-2015                    | Population-based;<br>Household survey<br><br>N= 91,123 to 10,1973 | <i>Mental health conditions, suicide, or self-harm:</i> state prevalence of serious mental illness                                                                                                             | Liberal MCL associated with 0.2% increase in state prevalence of mental illness ( $b=0.002$ , $SE=0.001$ , $p=0.015$ ). No significant effect of restrictive MCL.                  | 17 |



|     |                |                                                                              |                                                                                  |                                     |                                                                                                                                                                        |                                                                                                                                                                                                  |    |
|-----|----------------|------------------------------------------------------------------------------|----------------------------------------------------------------------------------|-------------------------------------|------------------------------------------------------------------------------------------------------------------------------------------------------------------------|--------------------------------------------------------------------------------------------------------------------------------------------------------------------------------------------------|----|
| 30. | Estoup 2016    | United States<br><br>Legal regulation of cannabis for recreational use (RCL) | Repeated cross-sectional study, 2010-2015                                        | Convenience sampling<br><br>N=262   | <i>Mental health conditions, suicide, or self-harm</i> : # of reported psychological, behavioral, relational consequences of cannabis use                              | RCL associated with increased negative consequences of use, mediated by increased perceived harmfulness ( <i>b</i> for indirect effect=3.73; 95% CI=0.33, 9.55).                                 | 11 |
|     |                |                                                                              |                                                                                  |                                     | <i>Perceived harmfulness of decriminalized/regulated drug(s)</i> : # of cons of continued cannabis use endorsed in decisional balance matrix                           | RCL associated with increased perceived harmfulness.                                                                                                                                             |    |
|     |                |                                                                              |                                                                                  |                                     | <i>Frequency of use, decriminalized/legalized drug(s)</i> : # of times used in past 3 months                                                                           | No significant effect of RCL.                                                                                                                                                                    |    |
| 31. | Feige 2008     | China<br><br>Legal regulation of opium                                       | Repeated cross-sectional study, 1801-1902                                        | Unspecified                         | <i>Actual availability of decriminalized/regulated drug(s)</i> : Quantity of opium exports (number of chests per capita)                                               | No significant effect of legal regulation.                                                                                                                                                       | 16 |
|     |                |                                                                              |                                                                                  |                                     | <i>Price of drugs</i> : Price of opium at the scales in India                                                                                                          | No significant effect of legal regulation.                                                                                                                                                       |    |
| 32. | Félix 2017     | Portugal<br><br>Decriminalization of all drugs                               | Controlled before-and-after study, 1990-2010<br><br>[13 EU countries and Norway] | Convenience sampling                | <i>Price of drugs</i> : price data from (1) EU country reports to the Commission on Narcotic Drugs and (2) the European Monitoring Center for Drugs and Drug Addiction | Drug prices increased in Portugal following decriminalization, but difference-in-difference and synthetic control analyses indicate no statistically significant change in slope of drug prices. | 14 |
| 33. | Gonçalves 2015 | Portugal<br><br>Decriminalization of all drugs                               | Repeated cross-sectional study, 1999-2010                                        | Population-based; Admin record data | <i>Costs, health care</i> : combined direct costs of (1) drug treatment, prevention and harm reduction and (2) hospital treatment for hepatitis and HIV                | 12% increase over first 5 years following decriminalization, 9% over first 11 years.                                                                                                             | 13 |

|     |             |                                                                         |                                          |                                    |                                                                                                                                                      |                                                                                                                                                                                                                                                                      |    |
|-----|-------------|-------------------------------------------------------------------------|------------------------------------------|------------------------------------|------------------------------------------------------------------------------------------------------------------------------------------------------|----------------------------------------------------------------------------------------------------------------------------------------------------------------------------------------------------------------------------------------------------------------------|----|
|     |             |                                                                         |                                          |                                    | <i>Costs, non-health care:</i> combined indirect costs of lost income and production due to (1) drug addiction treatment and (2) drug-related death. | 37% reduction over first 5 years following decriminalization, 29% over first 11 years.                                                                                                                                                                               |    |
|     |             |                                                                         |                                          |                                    | <i>Costs, non-health care:</i> combined direct costs of social rehabilitation and legal system costs related to drugs                                | 17% reduction over first 11 years.                                                                                                                                                                                                                                   |    |
|     |             |                                                                         |                                          |                                    | <i>Costs, non-health care:</i> indirect costs of lost income and production of individuals arrested for drug-related crimes                          | 5% reduction over first 5 years following decriminalization, 24% over first 11 years.                                                                                                                                                                                |    |
| 34. | Gorman 2007 | United States<br><br>Legal regulation of cannabis for medical use (MCL) | Interrupted time series study, 1994-2002 | Convenience sampling               | <i>Prevalence of use, decriminalized/regulated drug(s):</i> prevalence of positive cannabis urine screen among arrestees.                            | No significant effect of MCL on positive cannabis tests in CA or OR.                                                                                                                                                                                                 | 12 |
|     |             |                                                                         |                                          |                                    | <i>Health services utilization:</i> proportion of emergency department visits in which cannabis was mentioned in CA, WA, and CO DAWN sites           | No significant effect of MCL on ED visits mentioning cannabis.                                                                                                                                                                                                       |    |
| 35. | Grant 2018  | United States<br><br>Legal regulation of cannabis for medical use (MCL) | Cohort study, 1998-2012                  | Convenience sampling<br><br>N=1359 | <i>Prevalence of use, decriminalized/regulated drug(s):</i> use in last 30 days of substance use case management program                             | Participants exiting case management after MCL were more likely to report past 30-day use (AOR = 2.1, p < 0.0001).                                                                                                                                                   | 12 |
|     |             |                                                                         |                                          |                                    | <i>Prevalence of use, other drugs or alcohol:</i> # of days of use, in past 30 days, of alcohol or drugs                                             | Participants exiting case management after MCL used alcohol ( $b = 0.48$ , $SE=0.24$ , $p < 0.05$ ), illicit methadone ( $b = 0.67$ , $SE=0.22$ , $p < 0.005$ ), and other opioids ( $b = 0.52$ , $SE=0.15$ ), $p < 0.01$ ) more frequently than the pre-MCL cohort. |    |
| 36. | Gruza 2018  | United States                                                           | Controlled before-and-after study,       | Population-based;                  | <i>Criminal justice involvement:</i> arrest rates for cannabis                                                                                       | Arrest rates decreased by 75% among youth (95% CI: -0.89, -0.44) and 78% among adults (95% CI: -0.89, -0.52).                                                                                                                                                        | 18 |

|     |             |                                                                          |                                                                                                               |                                                                |                                                                                                                                                                                                                                                                                        |                                                                                                                                                                                                                    |    |
|-----|-------------|--------------------------------------------------------------------------|---------------------------------------------------------------------------------------------------------------|----------------------------------------------------------------|----------------------------------------------------------------------------------------------------------------------------------------------------------------------------------------------------------------------------------------------------------------------------------------|--------------------------------------------------------------------------------------------------------------------------------------------------------------------------------------------------------------------|----|
|     |             | Cannabis decriminalization                                               | 2007-2015<br>[States without decriminalization, legal regulation, or change in penalties related to cannabis] | School-based survey<br>N= 622,848                              | possession among minors (18 or under) and adults<br><i>Prevalence of use, decriminalized/regulated drug(s):</i> past 30-day use<br><i>Frequency of use, decriminalized/regulated drug(s):</i> frequency of past 30-day use                                                             | Decriminalization was not significantly associated with use.<br>Decriminalization was not significantly associated with frequency of use.                                                                          |    |
| 37. | Gruza 2015  | United States<br>Legal regulation of cannabis for medical use (MCL)      | Controlled before-and-after study, 1990-2010<br>[States without MCL]                                          | Population-based;<br>Admin record data<br>N=662,993            | <i>Mental health conditions, suicide, or self-harm:</i> suicide deaths                                                                                                                                                                                                                 | MCL not significantly associated with suicide rate overall, or when stratified by sex.                                                                                                                             | 16 |
| 38. | Harper 2012 | United States<br>Legal regulation of cannabis for medical use (MCL)      | Controlled before-and-after study, 2002-2009<br>[States without MCL]                                          | Population-based Household survey                              | <i>Prevalence of use, decriminalized/regulated drug(s):</i> past-month use among adolescents<br><i>Perceived harmfulness of decriminalized/regulated drug(s):</i> perceived riskiness of monthly use among adolescents                                                                 | *Reanalysis of Wall 2011 (#106)<br>Difference-in-difference estimates indicate no significant effects of MCL, after accounting for state-level covariates and measurement error.<br>No significant effects of MCL. | 15 |
| 39. | Harpin 2018 | United States<br>Legal regulation of cannabis for recreational use (RCL) | Repeated cross-sectional study, 2013-2014                                                                     | Population-based;<br>School-based survey<br>N=11,931 to 12,240 | <i>Prevalence of use, decriminalized/regulated drug(s):</i> lifetime and past 30-day use<br><i>Mode of use, decriminalized/regulated drug(s):</i> smoking vs. other modes, among past-month users<br><i>Perceived harmfulness of decriminalized/regulated drug(s):</i> high versus low | No significant change after RCL.<br>No significant change after RCL.<br>No significant change after RCL.                                                                                                           | 13 |

|     |            |                                                                              |                                                                                                               |                                                             |                                                                                                               |                                                                                                                                                                                                            |     |
|-----|------------|------------------------------------------------------------------------------|---------------------------------------------------------------------------------------------------------------|-------------------------------------------------------------|---------------------------------------------------------------------------------------------------------------|------------------------------------------------------------------------------------------------------------------------------------------------------------------------------------------------------------|-----|
|     |            |                                                                              |                                                                                                               |                                                             | perceived harmfulness and wrongfulness of use                                                                 |                                                                                                                                                                                                            |     |
|     |            |                                                                              |                                                                                                               |                                                             | <i>Perceived availability of decriminalized/regulated drug(s): high versus low perceived ease of access</i>   | Post-RCL year associated with high perceived access, (AOR= 1.21, 95% CI: 1.09, 1.34).                                                                                                                      |     |
| 40. | Hasin 2017 | United States<br><br>Legal regulation of cannabis for medical use (MCL)      | Controlled before-and-after study, 1991-1992; 2001-2001; 2012-2013<br><br>[late MCL states, never MCL states] | Population-based; Household survey<br><br>N=118,497         | <i>Prevalence of use, decriminalized/regulated drug(s): past-year use</i>                                     | MCL associated with greater increase in past-year use (difference-in-difference coefficient=1.4 percentage points, SE=0.5, p=0.004). Results varied by state and early vs. late MCL adoption.              | 17  |
|     |            |                                                                              |                                                                                                               |                                                             | <i>Substance use disorder or diagnosed dependence: DSM-IV Cannabis Use Disorder in past year</i>              | MCL associated with greater increase in CUD (difference-in-difference coefficient=0.7, SE=0.3, p=0.03).                                                                                                    |     |
| 41. | Hasin 2015 | United States<br><br>Legal regulation of cannabis for medical use (MCL)      | Repeated cross-sectional study, 1991-2014                                                                     | Population-based; School-based survey<br><br>N=1,098,270    | <i>Prevalence of use, decriminalized/regulated drug(s): past 30-day use</i>                                   | No significant effect of MCL overall, but interaction with grade: reduced use among 8 <sup>th</sup> graders post-MCL (AOR=0.73, 95% CI: 0.63, 0.84), but not 10 <sup>th</sup> or 12 <sup>th</sup> graders. | 18  |
| 42. | Hasin 2017 | United States<br><br>Legal regulation of cannabis for medical use (MCL)      | Repeated cross-sectional study, 1991-1992; 2001-2002; 2012-2013                                               | Population-based Household survey                           | <i>Driving under the influence or with detectable concentration, decriminalized/regulated drug(s)</i>         | Prevalence of cannabis-impaired driving increased more in states that passed MCL, but not significantly so (p=0.07).                                                                                       | A * |
|     |            |                                                                              |                                                                                                               |                                                             | <i>Driving under the influence or with detectable concentration, : driving under the influence of alcohol</i> | No significant effect of MCL.                                                                                                                                                                              |     |
| 43. | Hoyte 2015 | United States<br><br>Legal regulation of cannabis for recreational use (RCL) | Repeated cross-sectional study, 2007-2014                                                                     | Population-based; Admin record data<br><br>N= 42 fatalities | <i>Accidents, motor vehicle: THC-positive motor driver fatalities in Denver County, CO</i>                    | Fatalities increased from 0.28/month from July 1, 2007 to Dec 31, 2008 to 0.5/month from 2009-2012 to 0.56/month from Jan 1, 2013 to June 30, 2014 (post-RCL). No statistical tests reported.              | A * |

|     |              |                                                                          |                                                                                           |                                                       |                                                                                                                                  |                                                                                                                                                                                                                                                |    |
|-----|--------------|--------------------------------------------------------------------------|-------------------------------------------------------------------------------------------|-------------------------------------------------------|----------------------------------------------------------------------------------------------------------------------------------|------------------------------------------------------------------------------------------------------------------------------------------------------------------------------------------------------------------------------------------------|----|
| 44. | Huber 2016   | United States<br>Legal regulation of cannabis for medical use (MCL)      | Repeated cross-sectional study, 1970-2012                                                 | Population-based;<br>Admin record data                | <i>Crime (non-drug):</i> state violent crime rates (FBI Uniform Crime Reports)                                                   | MCL associated with 12.9% reduction in rate ( $b=-0.129$ , $SE=0.036$ , $p<0.01$ ).                                                                                                                                                            | 14 |
|     |              |                                                                          |                                                                                           |                                                       | <i>Crime (non-drug):</i> state property crime rates                                                                              | MCL associated with 9.2% reduction in rate ( $b=-0.092$ , $SE=0.032$ , $p<0.01$ ).                                                                                                                                                             |    |
| 45. | Hunt 2017    | United States<br>Legal regulation of cannabis for recreational use (RCL) | Controlled before-and-after study, 2013;2014<br><br>[WA and OR before RCL implementation] | Population-based;<br>Household survey<br><br>N=5576   | <i>Price of drugs:</i> consumer-reported price per gram                                                                          | No statistically significant effects of implementing legal retail cannabis sales in CO and WA on prices paid for recreational or medical purposes, 4-5 months later.                                                                           | 16 |
| 46. | Johnson 2017 | United States<br>Legal regulation of cannabis for medical use (MCL)      | Repeated cross-sectional study, 1991-2011                                                 | Population-based;<br>School-based survey<br>N=715,014 | <i>Prevalence of use, decriminalized/regulated drug(s):</i> past 30-day use among adolescents                                    | MCL associated with decreased odds of past 30-day use (AOR=0.93, 95% CI: 0.86, 0.99). Policy details associated with lower (e.g., years since MCL and liberal provisions) and higher (e.g., voluntary vs. mandatory patient registration) use. | 17 |
|     |              |                                                                          |                                                                                           |                                                       | <i>Frequency of use, decriminalized/regulated drug(s):</i> past 30-day heavy use ( $\geq 20$ times)                              | MCL not associated with odds of heavy use (AOR=1.00, 95% CI: 0.89, 1.13).                                                                                                                                                                      |    |
| 47. | Jones 2015   | United States<br>Legal regulation of cannabis for recreational use (RCL) | Repeated cross-sectional study, 2012; 2014                                                | Unspecified                                           | <i>Prevalence of use, decriminalized/regulated drug(s):</i> THCA-positive meconium specimens from high-risk newborns in Colorado | RCL associated with increase in THCA-positive specimens (from 10.6% to 11.7%) and with increased mean THCA concentrations in positive specimens.                                                                                               | A* |
| 48. | Jones 2018   | United States<br>Legal regulation of cannabis for recreational use (RCL) | Repeated cross-sectional study, 2013-2015                                                 | Convenience sampling<br><br>N=1413                    | <i>Frequency of use, decriminalized/regulated drug(s):</i> Categories from no use to daily use.                                  | No statistically significant difference in use frequency between pre- and post-RCL periods.                                                                                                                                                    | 10 |
|     |              |                                                                          |                                                                                           |                                                       | <i>Prevalence of use, other drugs or alcohol:</i> Frequency of cannabis use within alcohol use frequency groups                  | Strength of the relationship between alcohol and cannabis use decreased after RCL (from $r=0.54$ in Nov 2013 to 0.33 in Mar 2015).                                                                                                             |    |

|     |               |                                                                                                |                                           |                                                           |                                                                                                                                                   |                                                                                                                                                                                                                      |    |
|-----|---------------|------------------------------------------------------------------------------------------------|-------------------------------------------|-----------------------------------------------------------|---------------------------------------------------------------------------------------------------------------------------------------------------|----------------------------------------------------------------------------------------------------------------------------------------------------------------------------------------------------------------------|----|
| 49. | Kerr DCR 2017 | United States<br><br>Legal regulation of cannabis for recreational use (RCL)                   | Repeated cross-sectional study, 2012-2016 | Population-based;<br>School-based survey<br><br>N=10,924  | <i>Prevalence of use, decriminalized/regulated drug(s): past 30-day use</i>                                                                       | No significant association between RCL and past 30-day use overall (AOR=1.21, $p=0.48$ ) but increasing secular trend. RCL associated with increased cannabis use among heavy alcohol users (AOR=1.73, $p=0.0076$ ). | 17 |
|     |               |                                                                                                |                                           |                                                           | <i>Prevalence of use, other drugs or alcohol: past 30-day cigarette use</i>                                                                       | No significant association with RCL.                                                                                                                                                                                 |    |
|     |               |                                                                                                |                                           |                                                           | <i>Prevalence of use, other drugs or alcohol: past 30-day heavy alcohol use</i>                                                                   | No significant association with RCL.                                                                                                                                                                                 |    |
| 50. | Kerr WC 2018  | United States<br><br>Legal regulation of cannabis for medical (MCL) and recreational use (RCL) | Repeated cross-sectional study, 1984-2015 | Population-based;<br>Household survey<br><br>N=37,359     | <i>Prevalence of use, decriminalized/regulated drug(s): past-year use</i>                                                                         | No significant association between MCL (home growing or dispensaries) or RCL and past-year use, among both women and men.                                                                                            | 17 |
| 51. | Kerr DCR 2018 | United States<br><br>Legal regulation of cannabis for recreational use (RCL)                   | Repeated cross-sectional study, 2008-2016 | Population-based;<br>School-based survey<br><br>N=281,752 | <i>Prevalence of use, decriminalized/regulated drug(s): past 30-day use</i>                                                                       | RCL associated with increased past 30-day use among university students (AOR= 1.29, 95% CI: 1.13, 1.48).                                                                                                             | 17 |
|     |               |                                                                                                |                                           |                                                           | <i>Prevalence of use, other drugs or alcohol: past 30-day tobacco use</i>                                                                         | RCL associated with decreased tobacco use (AOR= 0.71, $p=0.0001$ ).                                                                                                                                                  |    |
|     |               |                                                                                                |                                           |                                                           | <i>Prevalence of use, other drugs or alcohol: past 30-day alcohol use</i>                                                                         | RCL not associated with alcohol use ( $p=0.59$ ).                                                                                                                                                                    |    |
|     |               |                                                                                                |                                           |                                                           | <i>Prevalence of use, other drugs or alcohol: past 30-day illicit drug use (non-cannabis)</i>                                                     | RCL not associated with illicit drug use ( $p=0.78$ ).                                                                                                                                                               |    |
| 52. | Keyes 2016    | United States<br><br>Legal regulation of cannabis for medical use (MCL)                        | Repeated cross-sectional study, 1991-2014 | Population-based;<br>School-based survey<br><br>N=973,089 | <i>Perceived harmfulness of decriminalized/regulated drug(s): great or moderate vs. low perceived risk of physical harm due to occasional use</i> | No significant association with MCL in all grades, 10 <sup>th</sup> or 12 <sup>th</sup> , but increased perceived harm in 8 <sup>th</sup> (AOR= 1.21, 95% CI: 1.08, 1.36).                                           | 15 |
|     |               |                                                                                                |                                           |                                                           | <i>Prevalence of use, decriminalized/regulated drug(s): past 30-day use</i>                                                                       | Adjusting for perceived harmfulness, significant negative association between                                                                                                                                        |    |

|     |                            |                                                                          |                                                      |                                                |                                                                                                                                                                                                                                    |                                                                                                                                                                                                                                                                                  |    |
|-----|----------------------------|--------------------------------------------------------------------------|------------------------------------------------------|------------------------------------------------|------------------------------------------------------------------------------------------------------------------------------------------------------------------------------------------------------------------------------------|----------------------------------------------------------------------------------------------------------------------------------------------------------------------------------------------------------------------------------------------------------------------------------|----|
|     |                            |                                                                          |                                                      |                                                |                                                                                                                                                                                                                                    | MCL and use in 8 <sup>th</sup> grade only (AOR=0.81, 95% CI: 0.72, 0.92).                                                                                                                                                                                                        |    |
| 53. | Khatapoush 2004            | United States<br>Legal regulation of cannabis for medical use (MCL)      | Repeated cross-sectional study, 1995;1997;1999       | Population-based; Household survey<br>N=15,567 | <i>Prevalence of use, decriminalized/regulated drug(s):</i> past-month use<br><i>Perceived availability of decriminalized/regulated drug(s)</i><br><i>Prevalence of use, other drugs or alcohol:</i> past-year use of other drugs. | No statistically significant change over time in California (MCL state) or other states.<br>No statistically significant change over time in California (MCL state) or other states.<br>No statistically significant change over time in California (MCL state) or other states. | 10 |
| 54. | Kim, Anderson et al. 2015  | United States<br>Cannabis decriminalization                              | Repeated cross-sectional study, 2008-2009; 2010-2011 | Population-based; Admin record data<br>N=2574  | <i>Health services utilization:</i> emergency department visits for cyclic vomiting                                                                                                                                                | Decriminalization associated with increase in visits (prevalence ratio= 1.92, 95% CI: 1.33, 2.79).                                                                                                                                                                               | 15 |
| 55. | Kim, Hall, et al. 2016     | United States<br>Legal regulation of cannabis for recreational use (RCL) | Repeated cross-sectional study, 2012-2014            | Population-based; Admin record data            | <i>Health services utilization:</i> cannabis-related emergency department visits                                                                                                                                                   | RCL associated with increase in cannabis-related ED visits by Colorado residents (rate ratio; RR=1.46, $p>0.001$ ) and non-residents (RR=1.17, $p>0.001$ ).                                                                                                                      | 14 |
| 56. | Kim, Santaella et al. 2015 | United States<br>Legal regulation of cannabis for medical use (MCL)      | Repeated cross-sectional study, 1999-2011            | Population-based; Admin record data            | <i>Prescription drug use:</i> annual opioid sales in morphine-equivalent doses                                                                                                                                                     | Adjusting for increasing secular trend, MCL associated with 1% reduction in opioid sales per year of MCL ( $b=-0.01$ , $p=0.0016$ ).                                                                                                                                             | A* |
| 57. | Kim 2017                   | United States<br>Legal regulation of cannabis for medical use (MCL)      | Repeated cross-sectional study, 2004-2013            | Population-based; Household survey             | <i>Prevalence of use, other drugs or alcohol:</i> past-month nonmedical use of prescription opioids                                                                                                                                | No significant difference in prevalence post-MCL for youth, young adults, or adults 26+.                                                                                                                                                                                         | A* |

|     |                                     |                                                                          |                                           |                                                    |                                                                                                                                                                       |                                                                                                                                                             |     |
|-----|-------------------------------------|--------------------------------------------------------------------------|-------------------------------------------|----------------------------------------------------|-----------------------------------------------------------------------------------------------------------------------------------------------------------------------|-------------------------------------------------------------------------------------------------------------------------------------------------------------|-----|
| 58. | Kim, Santaella-Tenorio, et al. 2016 | United States<br>Legal regulation of cannabis for medical use (MCL)      | Repeated cross-sectional study, 1999-2013 | Population-based;<br>Admin record data<br>N=68,394 | <i>Driving under the influence or with detectable concentration, other drugs or alcohol:</i> positive opioid tests among driver fatalities in motor vehicle accidents | MCL not significantly associated with opioid presence overall, but with reduction among decedents age 24-40 (AOR post-MCL vs. pre=0.50, 95% CI=0.37, 0.67). | 17  |
| 59. | Kosterman 2016                      | United States<br>Legal regulation of cannabis for recreational use (RCL) | Interrupted time series study, 1985-2014  | Convenience sampling<br>N=395                      | <i>Frequency of use, decriminalized/regulated drug(s):</i> past-month frequency among WA parents with any past-year use                                               | Frequency of use increased post-RCL (from 4-6 to 10 times/month, $p<0.05$ ).                                                                                | 8   |
|     |                                     |                                                                          |                                           |                                                    | <i>Substance use disorder or diagnosed dependence:</i> meets DSM-IV criteria for cannabis use disorder                                                                | No statistically significant change post-RCL.                                                                                                               |     |
|     |                                     |                                                                          |                                           |                                                    | <i>Perceived harmfulness of decriminalized/regulated drug(s):</i> approval and perceived harmfulness of cannabis use                                                  | Approval increased and perceived harmfulness decreased following RCL ( $p<0.05$ ).                                                                          |     |
| 60. | Larimer 2015                        | United States<br>Legal regulation of cannabis for recreational use (RCL) | Cohort study                              | Unspecified<br>N= 1095                             | <i>Frequency of use, decriminalized/regulated drug(s):</i> # of times used in past month among 12-17 year olds                                                        | No significant change associated with RCL.                                                                                                                  | A * |
|     |                                     |                                                                          |                                           |                                                    | <i>Perceived harmfulness of decriminalized/regulated drug(s):</i> perceived risk due to regular and occasional use                                                    | Perceived risk from regular use decreased among males but not females ( $p$ for interaction=0.017).                                                         |     |
|     |                                     |                                                                          |                                           |                                                    | <i>Perceived availability of decriminalized/regulated drug(s)</i>                                                                                                     | No significant change associated with RCL.                                                                                                                  |     |
|     |                                     |                                                                          |                                           |                                                    | <i>Prevalence of use, other drugs or alcohol:</i> number of drinks consumed per week.                                                                                 | RCL associated with increased number of drinks per week ( $p<0.01$ ), beyond time trends.                                                                   |     |
| 61. | Liang 2018                          | United States<br>Legal regulation of cannabis for                        | Repeated cross-sectional study, 1993-2014 | Population-based;<br>Admin record data             | <i>Prescription drug use:</i> # of filled opioid prescriptions, dosage of filled prescriptions in morphine-equivalent doses, and related Medicaid spending            | MCL not associated not associated with Schedule II opioid use.                                                                                              | 15  |



|     |                     |                                                                          |                                                |                                          |                                                                                                                                 |                                                                                                                                                 |     |
|-----|---------------------|--------------------------------------------------------------------------|------------------------------------------------|------------------------------------------|---------------------------------------------------------------------------------------------------------------------------------|-------------------------------------------------------------------------------------------------------------------------------------------------|-----|
|     |                     | medical use (MCL)                                                        |                                                |                                          | for Schedule II opioids (e.g., hydrocodone, oxycodone).                                                                         |                                                                                                                                                 |     |
|     |                     |                                                                          |                                                |                                          | <i>Prescription drug use:</i> as above, for Schedule III opioids (e.g. codeine).                                                | MCL associated with reductions in Schedule III opioid prescriptions (-29.6%, 95% CI: -2.4%, -56.7%), doses, and spending.                       |     |
| 62. | Livingston 2017     | United States<br>Legal regulation of cannabis for recreational use (RCL) | Interrupted time series study, 2000-2015       | Population-based;<br>Admin record data   | <i>Overdose or poisoning, other drugs:</i> deaths with ICD-10 code indicating opioid poisoning                                  | RCL associated with reduction in opioid poisoning deaths, adjusting for comparison state trends (-0.68 deaths per month, 95% CI: -1.35, -0.03). | 16  |
| 63. | Lo 2015             | United States<br>Legal regulation of cannabis for recreational use (RCL) | Uncontrolled before-and-after study, 2013-2015 | Convenience sampling<br>N= 2186          | <i>Prevalence of use, decriminalized/regulated drug(s):</i> positive cannabinoid screen among high-risk opioid therapy patients | RCL associated with increase in positive THC screens (30% of visits to 36%, $p=0.0003$ ).                                                       | A * |
|     |                     |                                                                          |                                                |                                          | <i>Opioid therapy compliance:</i> non-compliance (illicit opioids use or non-use of prescription)                               | RCL not associated with compliance.                                                                                                             |     |
| 64. | Lynne-Landsman 2013 | United States<br>Legal regulation of cannabis for medical use (MCL)      | Switching replications study, 2003-2011        | Population-based;<br>School-based survey | <i>Prevalence of use, decriminalized/regulated drug(s):</i> lifetime and past-month                                             | MCL not associated with use (1 of 20 planned comparisons significant, expected by chance alone).                                                | 15  |
|     |                     |                                                                          |                                                |                                          | <i>Frequency of use, decriminalized/legalized drug(s):</i> daily or weekly use among lifetime users                             | MCL not associated with frequency (1 of 20 planned comparisons significant, expected by chance alone).                                          |     |
| 65. | Martins 2016        | United States<br>Legal regulation of cannabis for medical use (MCL)      | Repeated cross-sectional study, 2004-2013      | Population-based;<br>Household survey    | <i>Prevalence of use, decriminalized/regulated drug(s):</i> past-month use                                                      | MCL associated with greater past-month use among adults 26+ (AOR=1.24, 95% CI: 1.16, 1.31), but not among ages 12-17 or 18-25.                  | 16  |
|     |                     |                                                                          |                                                |                                          | <i>Perceived availability of decriminalized/regulated drug(s):</i> fairly or very easy to obtain vs. other                      | MCL associated with greater availability among adults 26+ (AOR=1.11, 95% CI: 1.07, 1.15), but not among ages 12-17 or 18-25.                    |     |
| 66. | Mason 2016          | United States                                                            | Controlled before-and-after study,             | Convenience sampling                     | <i>Prevalence of use, decriminalized/regulated drug(s):</i> past 30-day use                                                     | Post-RCL subject group not significantly associated with use (AOR= 2.80, 95% CI: 0.94–8.34).                                                    | 13  |

|     |             |                                                                     |                                                        |                                                     |                                                                                                                                                                                                           |                                                                                                                                                                                                                                                                                              |     |
|-----|-------------|---------------------------------------------------------------------|--------------------------------------------------------|-----------------------------------------------------|-----------------------------------------------------------------------------------------------------------------------------------------------------------------------------------------------------------|----------------------------------------------------------------------------------------------------------------------------------------------------------------------------------------------------------------------------------------------------------------------------------------------|-----|
|     |             | Legal regulation of cannabis for recreational use (RCL)             | 2010-2013<br>[students completed follow up before RCL] | N= 238                                              | <i>Prevalence of use, other drugs or alcohol: use of cigarettes or alcohol vs. cannabis (indicating substitution effect)</i>                                                                              | Post-RCL subject group significantly less likely to use cigarettes or alcohol versus cannabis ( $p < 0.05$ ).                                                                                                                                                                                |     |
| 67. | Masten 2014 | United States<br>Legal regulation of cannabis for medical use (MCL) | Interrupted time series study, 1992-2009               | Population-based;<br>Admin record data<br>N=245,495 | <i>Driving under the influence or with detectable concentration, decriminalized/regulated drug(s): proportion of fatal-crash-involved drivers (decedents and survivors) who test cannabinoid-positive</i> | Significant policy effect found in 3 of 12 MCL states, with increases of 2.1-6.0 percentage points among all drivers and 4.6-9.6 among fatally injured drivers in CA, HI, and OR (adjusted for changes in testing and national trends). These were step increases rather than upward trends. | 14  |
| 68. | Mauro 2019  | United States<br>Legal regulation of cannabis for medical use (MCL) | Repeated cross-sectional study, 2004-2013              | Population-based;<br>Household survey               | <i>Prevalence of use, decriminalized/regulated drug(s): past-month use</i>                                                                                                                                | No significant effect of MCL among men or women aged 12-17 or 18-25, but significant increases for ages 26+ among men (+1.7 percentage points, $p < 0.001$ ) and women (+ 1.1%, $p = 0.013$ ).                                                                                               | 16  |
|     |             |                                                                     |                                                        |                                                     | <i>Frequency of use, decriminalized/legalized drug(s): daily use among past-year users</i>                                                                                                                | Significant effect of MCL among men aged 18-25 (+ 2.4%, $p = 0.047$ ), and both men and women age 26+ (men + 2.8%, $p = 0.014$ ; women + 3.4 %, $p = 0.003$ ).                                                                                                                               |     |
|     |             |                                                                     |                                                        |                                                     | <i>Substance use disorder or diagnosed dependence: met DSM-IV criteria for cannabis use disorder</i>                                                                                                      | No statistically significant effect of MCL for any age-gender group.                                                                                                                                                                                                                         |     |
| 69. | Mauro 2017  | United States<br>Legal regulation of cannabis for medical use (MCL) | Repeated cross-sectional study, 2004-2013              | Population-based;<br>Household survey               | <i>Prevalence of use, decriminalized/regulated drug(s): past-month use</i>                                                                                                                                | MCL associated with increased use among adults 26-39 [AOR=1.2, 95% CI: 1.1, 1.3], 40-64 [AOR=1.4, 95% CI: 1.2, 1.5], and 65+ [AOR=2.6, 95% CI: 1.5, 4.6].                                                                                                                                    | A * |
|     |             |                                                                     |                                                        |                                                     | <i>Perceived availability of decriminalized/regulated drug(s)</i>                                                                                                                                         | MCL associated with increased perceived accessibility of cannabis, which partially mediated association between MCL and use.                                                                                                                                                                 |     |

|     |             |                                                                         |                                           |                                                           |                                                                                                                                                              |                                                                                                                                                                                                                                                                                          |    |
|-----|-------------|-------------------------------------------------------------------------|-------------------------------------------|-----------------------------------------------------------|--------------------------------------------------------------------------------------------------------------------------------------------------------------|------------------------------------------------------------------------------------------------------------------------------------------------------------------------------------------------------------------------------------------------------------------------------------------|----|
| 70. | Merker 2018 | United States<br><br>Legal regulation of cannabis for medical use (MCL) | Repeated cross-sectional study, 2012-2017 | Convenience sampling<br><br>N=302                         | <i>Prevalence of use, decriminalized/regulated drug(s):</i> current use among Inflammatory Bowel Disease patients                                            | Increase in use post-MCL (12.3% to 22.8% of patients, $p=0.0008$ ), but no significant increase in reported medical use.                                                                                                                                                                 | 12 |
| 71. | Miech 2015  | United States<br><br>Cannabis decriminalization                         | Repeated cross-sectional study, 2007-2013 | Population-based;<br>School-based survey<br><br>N=320,809 | <i>Prevalence of use, decriminalized/regulated drug(s):</i> lifetime, past-year, past 30-day use                                                             | [Decriminalization in CA in 2010] 8 <sup>th</sup> and 10 <sup>th</sup> grades: differences in use between CA residents and other states limited to select years, not sustained over time. 12 <sup>th</sup> grade: past-year use higher among CA residents vs. other states in 2010-2013. | 12 |
|     |             |                                                                         |                                           |                                                           | <i>Perceived harmfulness of decriminalized/regulated drug(s):</i> great vs. less-than-great perceived risk of regular use                                    | 8 <sup>th</sup> and 10 <sup>th</sup> grades: only one significant difference (8 <sup>th</sup> grade in 2012). 12 <sup>th</sup> grade: lower perceived risk among CA residents vs. other states in 2012-2013.                                                                             |    |
|     |             |                                                                         |                                           |                                                           | <i>Perceived availability of decriminalized/regulated drug(s):</i> easy vs. less-than-easy perceived access                                                  | 8 <sup>th</sup> and 10 <sup>th</sup> grades: only one significant difference (8 <sup>th</sup> grade in 2011). 12 <sup>th</sup> grade: higher perceived availability among CA residents vs. other states in 2012 only.                                                                    |    |
|     |             |                                                                         |                                           |                                                           | <i>Attitudes towards use, decriminalized/regulated drug(s):</i> strong disapproval of adult use vs. other                                                    | 8 <sup>th</sup> and 10 <sup>th</sup> grades: only one significant difference (8 <sup>th</sup> grade in 2012). 12 <sup>th</sup> grade: less strong disapproval among CA residents vs. other states in 2012-2013                                                                           |    |
|     |             |                                                                         |                                           |                                                           | <i>Attitudes towards use, decriminalized/regulated drug(s):</i> definitely or probably expect to use five years from present (only 12 <sup>th</sup> graders) | 12 <sup>th</sup> grade: greater expected use among CA residents vs. other states in 2012-2013.                                                                                                                                                                                           |    |
| 72. | Miller 2017 | United States<br><br>Legal regulation of cannabis for                   | Repeated cross-sectional study, 2005-2015 | Population-based;<br>School-based survey                  | <i>Prevalence of use, decriminalized/regulated drug(s):</i> past 30-day use                                                                                  | RCL associated with increase of 2.0-3.5 percentage points (12-22%), adjusting for linear secular trend [passage of RCL, additional effect of legal store openings not statistically significant].                                                                                        | 16 |

|     |             |                                                                          |                                                                                         |                                                                 |                                                                                                                                               |                                                                                                                                                                     |    |
|-----|-------------|--------------------------------------------------------------------------|-----------------------------------------------------------------------------------------|-----------------------------------------------------------------|-----------------------------------------------------------------------------------------------------------------------------------------------|---------------------------------------------------------------------------------------------------------------------------------------------------------------------|----|
|     |             | recreational use (RCL)                                                   |                                                                                         | N=13,335                                                        | <i>Frequency of use, decriminalized/legalized drug(s):</i> past 30-day frequency                                                              | RCL associated with increase of 0.5 days per month, adjusting for linear secular trend [passage of RCL, additional effect of legal store openings not significant]. |    |
|     |             |                                                                          |                                                                                         |                                                                 | <i>Prevalence of use, other drugs or alcohol</i>                                                                                              | RCL passage not associated with changes. In 2015 (legal stores), decrease in tobacco and increase in other illegal drugs, but findings not robust.                  |    |
| 73. | Model 1993  | United States<br>Cannabis decriminalization                              | Controlled before-and-after study, 1975-1978<br><br>[States that did not decriminalize] | Population-based;<br>Admin record data                          | <i>Health services utilization:</i> non-cannabis drug mentions at ER visits                                                                   | Decriminalization associated with 12% fewer drug mentions at ER visits ( $b=-0.133$ , $SE=0.053$ , $p<0.01$ ), with stronger effects in initial years.              | 16 |
|     |             |                                                                          |                                                                                         |                                                                 | <i>Health services utilization:</i> cannabis drug mentions at ER visits                                                                       | Decriminalization associated with 64% more cannabis mentions ( $b=-0.642$ , $SE=0.112$ , $p<0.01$ ), with stronger effects in later years.                          |    |
| 74. | Morris 2014 | United States<br>Legal regulation of cannabis for medical use (MCL)      | Repeated cross-sectional study, 1990-2006                                               | Population-based;<br>Admin record data                          | <i>Crime (non-drug):</i> rates of violent crime (homicide, rape, robbery, assault)                                                            | MCL associated with 2.4% reduction in homicide rate ( $p<0.01$ ).                                                                                                   | 16 |
|     |             |                                                                          |                                                                                         |                                                                 | <i>Crime (non-drug):</i> rates of property crime (burglary, larceny, auto theft)                                                              | No significant association between MCL and property crimes.                                                                                                         |    |
| 75. | Nappe 2016  | United States<br>Legal regulation of cannabis for recreational use (RCL) | Repeated cross-sectional study. 2010-2015                                               | Population-based;<br>Admin record data<br><br>N=5231 exposures  | <i>Overdose or poisoning, decriminalized/regulated drug:</i> cannabis exposures reported to the National Poison Data System in Colorado       | RCL associated with increase in cannabis exposures (86 in 2011 to 231 in 2015).                                                                                     | A* |
| 76. | Onders 2016 | United States<br>Legal regulation of cannabis for medical use (MCL)      | Repeated cross-sectional study 2000-2013                                                | Population-based;<br>Admin record data<br><br>N= 1969 exposures | <i>Overdose or poisoning, decriminalized/regulated drug:</i> cannabis exposures among children <6 reported to the National Poison Data System | MCL associated with increased exposures (rate ratio for post vs. pre-MCL=2.25, 95% CI: 1.45, 3.51). Exposures peaked in the year following RCL.                     | 13 |

|     |               |                                                                                                        |                                                                                             |                                                         |                                                                                                                          |                                                                                                                                                                                                                                                      |    |
|-----|---------------|--------------------------------------------------------------------------------------------------------|---------------------------------------------------------------------------------------------|---------------------------------------------------------|--------------------------------------------------------------------------------------------------------------------------|------------------------------------------------------------------------------------------------------------------------------------------------------------------------------------------------------------------------------------------------------|----|
| 77. | Pacula 2010   | United States<br><br>Cannabis decriminalization and legal regulation of cannabis for medical use (MCL) | Repeated cross-sectional study, 1987-2003                                                   | Convenience sampling                                    | <i>Price of drugs</i> : price per gram paid at the last transaction among arrestees                                      | Decriminalization and MCL associated with higher prices (indicating increased demand).                                                                                                                                                               | 13 |
| 78. | Pacula 2015   | United States<br><br>Legal regulation of cannabis for medical use (MCL)                                | Controlled before-and-after study, 1992-2011 and 1997-2011<br><br>[State-years without MML] | Population-based;<br>Admin record data<br><br>N=973     | <i>Addiction treatment utilization</i> : number of treatment admissions with cannabis as primary indication              | MCL associated with 14% reduction in cannabis admissions (difference-in-difference = -0.136, SE=0.067, $p < 0.05$ ). Larger effect size for non-criminal justice referrals. Partially offset by increase in admissions associated with dispensaries. | 15 |
|     |               |                                                                                                        |                                                                                             | Household survey<br><br>N=112,926                       | <i>Prevalence of use, decriminalized/regulated drug(s)</i> : past 30-day use                                             | No overall significant association between MCL and use.                                                                                                                                                                                              |    |
|     |               |                                                                                                        |                                                                                             |                                                         | <i>Frequency of use, decriminalized/regulated drug(s)</i> : heavy use (>20 of last 30 days), # of days of use in past 30 | No significant association between MCL and frequency of use.                                                                                                                                                                                         |    |
| 79. | Parnes 2018   | United States<br><br>Legal regulation of cannabis for recreational use (RCL)                           | Repeated cross-sectional study, 2013-2015                                                   | Convenience sampling<br><br>N=5241                      | <i>Prevalence of use, decriminalized/regulated drug(s)</i> : past 30-day use                                             | No significant association between RCL and use among CO undergraduates.                                                                                                                                                                              | 12 |
| 80. | Phillips 2017 | United States<br><br>Legal regulation of cannabis for medical use (MCL)                                | Repeated cross-sectional study, 2011-2014                                                   | Population-based;<br>Admin record data<br><br>N=188,266 | <i>Overdose or poisoning, other drugs</i> : state-level age-adjusted opioid-related mortality rate                       | MCL associated with 21.7% increase in opioid-related mortality ( $p < 0.0001$ ) but interacted with prescription drug monitoring programs such that rates decreased in states with both policies.                                                    | 15 |

|     |              |                                                                         |                                                                                                                        |                                                          |                                                                                                                                                                      |                                                                                                                                                                                                                          |    |
|-----|--------------|-------------------------------------------------------------------------|------------------------------------------------------------------------------------------------------------------------|----------------------------------------------------------|----------------------------------------------------------------------------------------------------------------------------------------------------------------------|--------------------------------------------------------------------------------------------------------------------------------------------------------------------------------------------------------------------------|----|
| 81. | Plunk 2016   | United States<br><br>Legal regulation of cannabis for medical use (MCL) | Repeated cross-sectional study, 2000-2014                                                                              | Population-based;<br>Household survey<br><br>N=5,483,715 | <i>Educational outcomes: high school non-completion</i>                                                                                                              | High-school age exposure to MCL not associated with non-completion overall, but with increase in probability of failing to complete conditioned on completing the 12 <sup>th</sup> grade (AOR=1.11, 95% CI: 1.05, 1.17). | 16 |
|     |              |                                                                         |                                                                                                                        |                                                          | <i>Educational outcomes: college non-enrollment among high school graduates</i>                                                                                      | High-school age exposure to MCL associated with college non-enrollment (AOR = 1.09, 95% CI: 1.04, 1.14). Dose-response relationship with years of exposure.                                                              |    |
|     |              |                                                                         |                                                                                                                        |                                                          | <i>Educational outcomes: college non-completion among college entrants aged 25+</i>                                                                                  | High-school age exposure to MCL associated with increase in probability of degree non-completion (AOR = 1.03, 95% CI: 1.01, 1.06).                                                                                       |    |
|     |              |                                                                         |                                                                                                                        |                                                          | <i>Prevalence of use, decriminalized/regulated drug(s): past-month use</i>                                                                                           | High-school age exposure to MCL not significantly associated with use.                                                                                                                                                   |    |
|     |              |                                                                         |                                                                                                                        |                                                          | <i>Frequency of use, decriminalized/regulated drug(s): daily use (40 or more times/month)</i>                                                                        | High-school age exposure to MCL not significantly associated with use overall, but among 12 <sup>th</sup> graders only (AOR=1.62, 95% CI: 1.04, 2.54).                                                                   |    |
| 82. | Pollini 2015 | United States<br><br>Cannabis decriminalization                         | Repeated cross-sectional study<br><br>Roadside Survey, 2010; 2012<br><br>Fatality Analysis Reporting System, 2008-2012 | Population-based;<br>Admin record data                   | <i>Driving under the influence or with detectable concentration, decriminalized/regulated drug(s): proportion of drivers testing THC-positive in roadside survey</i> | No statistically significant change in THC-positivity following decriminalization.                                                                                                                                       | 13 |
|     |              |                                                                         |                                                                                                                        | Roadside Survey, N=379-515<br><br>FARS, N=2860           | <i>Driving under the influence or with detectable concentration, decriminalized/regulated drug(s): presence of cannabinoids among fatally injured drivers</i>        | Increase in cannabinoid prevalence in 2012 as compared to the pre-decriminalization period (AOR = 1.67, 95% CI: 1.28, 2.18).                                                                                             |    |
| 83. | Powell 2018  | United States<br><br>Legal regulation of cannabis for                   | Repeated cross-sectional study, 1999-2013                                                                              | Population-based;<br>Admin record data                   | <i>Overdose or poisoning, other drugs: deaths related to prescription opioids and heroin</i>                                                                         | Existence of MCL not significantly associated with overdose mortality (only active dispensaries associated with reduction in deaths).                                                                                    | 15 |

|     |              |                                                                              |                                                                                               |                                                     |                                                                                                                                                          |                                                                                                                                                                          |    |
|-----|--------------|------------------------------------------------------------------------------|-----------------------------------------------------------------------------------------------|-----------------------------------------------------|----------------------------------------------------------------------------------------------------------------------------------------------------------|--------------------------------------------------------------------------------------------------------------------------------------------------------------------------|----|
|     |              | medical use (MCL)                                                            |                                                                                               |                                                     | <i>Addiction treatment utilization</i> : number of treatment episodes related to pain reliever misuse                                                    | Existence of MCL not significantly associated with overdose mortality (only active dispensaries associated with reduction).                                              |    |
|     |              |                                                                              |                                                                                               |                                                     | <i>Prevalence of use, other drugs or alcohol</i> : self-reported nonmedical use of pain relievers (National Survey on Drug Use and Health)               | No statistically significant association between MCL and use.                                                                                                            |    |
|     |              |                                                                              |                                                                                               |                                                     | <i>Prescription drug use</i> : morphine-equivalent doses of opioids distributed to legal medical markets                                                 | No statistically significant association between MCL and use over full time period.                                                                                      |    |
| 84. | Prue 2014    | United States<br><br>Peyote decriminalization                                | Repeated cross-sectional study, 1985-2010                                                     | Population-based; Household survey<br><br>N=886,088 | <i>Prevalence of use, decriminalized/regulated drug(s)</i> : peyote use                                                                                  | Use among American Indians increased from 1% in 1994 (year of American Indian Religious Freedom Act) to 10% in 1999. Use among non-American Indians remained steady <2%. | 7  |
|     |              |                                                                              |                                                                                               |                                                     | <i>Age of first use, decriminalized/regulated drug</i> : age at first use of peyote                                                                      | No significant change in age at first use among American Indians or non-American Indians following decriminalization.                                                    |    |
| 85. | Ramirez 2017 | United States<br><br>Legal regulation of cannabis for recreational use (RCL) | Repeated cross-sectional study, 2014;2015                                                     | Unspecified<br><br>N=2400                           | <i>Driving under the influence or with detectable concentration, decriminalized/regulated drug(s)</i> : daytime prevalence of cannabis-positive drivers  | Statistically significant increase post-RCL (7.8% to 18.9% after one year).                                                                                              | A* |
| 86. | Reith 2015   | International<br><br>Cannabis decriminalization                              | Controlled before-and-after study, 1980-2012<br><br>[Country-years without decriminalization] | Unspecified<br><br>N=102 countries                  | <i>Actual availability of decriminalized/regulated drug(s)</i> : kg of cannabis seized and number of plants eradicated divided by population in millions | Decriminalization associated with increased plant eradication ( $p<0.05$ ), but not seizures.                                                                            | 10 |

|     |                |                                                                              |                                                                               |                                                                  |                                                                                                                                                                                                                                              |                                                                                                                                                     |     |
|-----|----------------|------------------------------------------------------------------------------|-------------------------------------------------------------------------------|------------------------------------------------------------------|----------------------------------------------------------------------------------------------------------------------------------------------------------------------------------------------------------------------------------------------|-----------------------------------------------------------------------------------------------------------------------------------------------------|-----|
| 87. | Rodriguez 2016 | United States<br><br>Legal regulation of cannabis for recreational use (RCL) | Cohort study, 2009-2015                                                       | Convenience sampling<br><br>N= 1698                              | <i>Prevalence of use, decriminalized/regulated drug(s):</i> positive urine toxicology among pregnant young women<br><br><i>Disclosure of use, decriminalized/regulated drug(s):</i> agreement between self-reported use and urine toxicology | Increased cannabis-positive screens post-RCL (16.2 to 20.2%, $p=0.048$ ).<br><br>Improved agreement post-RCL (kappa = 0.504 vs. 0.191).             | A * |
| 88. | Rohda 2017     | United States<br><br>Legal regulation of cannabis for recreational use (RCL) | Repeated cross-sectional study, 2011-2016                                     | Population-based;<br>Admin record data<br><br>N=29,044 exposures | <i>Overdose or poisoning, other drugs:</i> synthetic cannabinoid receptor agonist (SCRA) exposures reported to poison control centers                                                                                                        | SCRA exposures declined in WA (175 to 28, $p=0.017$ ) and OR (39 to 14, $p=0.012$ ) following RCL, but not in all RCL states combined ( $p=0.41$ ). | A * |
| 89. | Rusby 2018     | United States<br><br>Legal regulation of cannabis for recreational use (RCL) | Cohort study, 2014-2016                                                       | Population-based;<br>School-based survey<br><br>N=444            | <i>Prevalence of use, decriminalized/regulated drug(s):</i> past 30-day use                                                                                                                                                                  | RCL not significantly associated with use.                                                                                                          | 12  |
|     |                |                                                                              |                                                                               |                                                                  | <i>Frequency of use, decriminalized/regulated drug(s):</i> number of days use in past 30                                                                                                                                                     | RCL associated with greater number of days of use (ARR=1.26, 95% CI: 1.10, 1.45).                                                                   |     |
|     |                |                                                                              |                                                                               |                                                                  | <i>Attitudes towards use, decriminalized/regulated drug(s):</i> willingness and intention to use (any vs. none)                                                                                                                              | RCL not significantly associated with willingness or intention to use.                                                                              |     |
| 90. | Sabia 2017     | United States<br><br>Legal regulation of cannabis for medical use (MCL)      | Controlled before-and-after study. 1990-2012<br><br>[State-years without MML] | Population-based;<br>Household survey<br><br>N=5,428,399         | <i>BMI</i>                                                                                                                                                                                                                                   | MCL associated with reduction in BMI (adjusted difference-in-differences for contemporaneous effect = -0.084, SE=0.034, $p<0.05$ ).                 | 16  |



|     |                        |                                                                     |                                                                               |                                                                  |                                                                                                                                  |                                                                                                                                                                                                       |    |
|-----|------------------------|---------------------------------------------------------------------|-------------------------------------------------------------------------------|------------------------------------------------------------------|----------------------------------------------------------------------------------------------------------------------------------|-------------------------------------------------------------------------------------------------------------------------------------------------------------------------------------------------------|----|
| 91. | Santaella-Tenorio 2017 | United States<br>Legal regulation of cannabis for medical use (MCL) | Repeated cross-sectional study, 1985-2014                                     | Population-based;<br>Admin record data<br><br>N=1,220,610 deaths | <i>Accidents, motor vehicle</i> : age-adjusted traffic fatality rates (all road users)                                           | MCL associated with 10.8% reduction in traffic fatality rates (95% CI = 9.0%, 12.5%).                                                                                                                 | 17 |
| 92. | Schmidt 2016           | United States<br>Legal regulation of cannabis for medical use (MCL) | Repeated cross-sectional study, 2014-2013                                     | Population-based;<br>Household survey<br><br>N=450,300           | <i>Perceived harmfulness of decriminalized/regulated drug(s)</i> : belief that weekly/monthly use is “not a great risk”          | Living in MCL state not associated with perceived harmfulness. (Secular trend towards greater permissiveness for all outcomes, but no significant effects MCL after control for state fixed effects). | 17 |
|     |                        |                                                                     |                                                                               |                                                                  | <i>Attitudes towards use, decriminalized/regulated drug(s)</i> : belief that parents/friends don't disapprove of trying cannabis | Living in MCL state not associated with perceived attitudes.                                                                                                                                          |    |
|     |                        |                                                                     |                                                                               |                                                                  | <i>Perceived availability of decriminalized/regulated drug(s)</i> : belief that cannabis is fairly or very easy to obtain        | Living in MCL state not associated with perceived availability.                                                                                                                                       |    |
| 93. | Seigny 2014            | United States<br>Legal regulation of cannabis for medical use (MCL) | Controlled before-and-after study, 1990-2010<br><br>[State-years without MCL] | Convenience sampling<br><br>N=39,157                             | <i>Potency of decriminalized/regulated drug(s)</i> : concentration of THC in cannabis seized by law enforcement                  | MCL not significantly associated with potency (adjusted difference in %THC=0.53, $p>0.05$ ), but legal dispensaries associated with higher potency.                                                   | 16 |
| 94. | Shah 2018              | United States<br>Legal regulation of cannabis for medical use (MCL) | Repeated cross-sectional study, 2006-2014                                     | Population-based;<br>Admin record data                           | <i>Prescription drug use</i> : opioid use among commercially insured population.                                                 | MCL associated with lower odds of any opioid use (AOR=0.95, 95% CI: 0.94, 0.96), chronic opioid use (AOR=0.93, 95% CI: 0.91, 0.95) and high-risk opioid use (AOR=0.98, 95% CI: 0.96, 0.99).           | A* |
| 95. | Shepard 2016           | United States<br>Legal regulation of cannabis for                   | Repeated cross-sectional study, 1997-2009                                     | Population-based;<br>Admin record data                           | <i>Crime (non-drug)</i> : property crime (burglary, larceny, and vehicle theft arrests per 1000 residents)                       | MCL not associated with property crime.                                                                                                                                                               | 12 |

|     |                  |                                                                          |                                                       |                                                                       |                                                                                                                                                                                                                                                                                                                                                                       |                                                                                                                                                                                                                                                                                                                                                                     |    |
|-----|------------------|--------------------------------------------------------------------------|-------------------------------------------------------|-----------------------------------------------------------------------|-----------------------------------------------------------------------------------------------------------------------------------------------------------------------------------------------------------------------------------------------------------------------------------------------------------------------------------------------------------------------|---------------------------------------------------------------------------------------------------------------------------------------------------------------------------------------------------------------------------------------------------------------------------------------------------------------------------------------------------------------------|----|
|     |                  | medical use (MCL)                                                        |                                                       |                                                                       | <i>Crime (non-drug):</i> violent crime (assault, homicide, rape, and robbery arrests)                                                                                                                                                                                                                                                                                 | MCL associated with reduction in violent crimes (-0.254 crimes per 1000 residents, SE=0.089, $p<0.05$ ).                                                                                                                                                                                                                                                            |    |
| 96. | Shi 2017         | United States<br>Legal regulation of cannabis for medical use (MCL)      | Repeated cross-sectional study, 1997-2014             | Population-based;<br>Admin record data<br><br>N= 0.4M to 2.2M records | <i>Health services utilization:</i> annual hospitalization rate for cannabis dependence or abuse (ICD-9)<br><br><i>Overdose or poisoning, other drugs:</i> hospitalization rate for opioid pain reliever overdose<br><br><i>Health services utilization:</i> hospitalization rate for opioid dependence or abuse                                                      | MCL not significantly associated with hospitalizations.<br><br>MCL associated with reduction in hospitalizations related to opioid overdose (adjusted prevalence difference = -0.13, 95% CI: -0.25, -0.018).<br><br>MCL associated with reduction in hospitalizations related to opioid dependence (adjusted prevalence difference = -0.23, 95% CI: -0.41, -0.068). | 16 |
| 97. | Sokoya 2018      | United States<br>Legal regulation of cannabis for recreational use (RCL) | Repeated cross-sectional study, 2012-2015             | Convenience sampling<br><br>N=2164                                    | <i>Accidents, other:</i> types of bony facial trauma among patients presenting to two CO hospitals                                                                                                                                                                                                                                                                    | RCL not associated with significant difference in mechanisms of facial fracture.                                                                                                                                                                                                                                                                                    | 12 |
| 98. | Steinemann 2018  | United States<br>Legal regulation of cannabis for medical use (MCL)      | Repeated cross-sectional study, 1993-2000; 2001-2015  | Population-based;<br>Admin record data<br><br>N=1578                  | <i>Driving under the influence or with detectable concentration, decriminalized/regulated drug(s):</i> proportion of fatally injured drivers who were cannabis-positive in HI<br><br><i>Driving under the influence or with detectable concentration, other drugs or alcohol:</i> proportion of fatally injured drivers who were methamphetamine- or alcohol-positive | MCL associated with increase in THC positivity (5.5% in 1993-2000; 16.3% in 2011-2015, $p<0.001$ ).<br><br>MCL not associated with significant difference in positivity rates.                                                                                                                                                                                      | 12 |
| 99. | Stolzenberg 2016 | United States<br>Legal regulation of cannabis for                        | Repeated cross-sectional study, 2002-2003; 2004-2005; | Population-based;<br>School-based survey                              | <i>Prevalence of use, decriminalized/regulated drug(s):</i> past-month use among adolescents                                                                                                                                                                                                                                                                          | Living in MCL state associated with greater use (adjusted coefficient=0.861, SE=0.298, $p<0.01$ ).                                                                                                                                                                                                                                                                  | 14 |

|      |             |                                                                          |                                                                           |                                                 |                                                                                                                                                                            |                                                                                                                                                                                   |    |
|------|-------------|--------------------------------------------------------------------------|---------------------------------------------------------------------------|-------------------------------------------------|----------------------------------------------------------------------------------------------------------------------------------------------------------------------------|-----------------------------------------------------------------------------------------------------------------------------------------------------------------------------------|----|
|      |             | medical use (MCL)                                                        | 2006-2007; 2008-2009; 2010-2011                                           |                                                 | <i>Prevalence of use, other drugs or alcohol</i> : past-month non-cannabis illicit drug use                                                                                | No significant association between living in MCL state and use.                                                                                                                   |    |
| 100. | Straub 2017 | United States<br>Legal regulation of cannabis for recreational use (RCL) | Repeated cross-sectional study, 2011-2012; 2012-2014; 2014-2016           | Population-based; Admin record data<br>N=25,763 | <i>Prevalence of use, decriminalized/regulated drug(s)</i> : positive urine screen or documented use during pregnancy                                                      | No significant change in cannabis-positivity post-RCL.                                                                                                                            | A* |
| 101. | Suggs 1981  | United States<br>Cannabis decriminalization                              | Uncontrolled before-and-after study, 1977-1979                            | Population-based; Admin record data<br>N=719    | <i>Criminal justice involvement</i> : possession arrests and citations for adults and minors in two NE cities                                                              | No significant difference in mean monthly arrests following decriminalization.                                                                                                    | 12 |
|      |             |                                                                          |                                                                           |                                                 | <i>Criminal justice involvement</i> : possession prosecutions for adults and minors                                                                                        | Significant increase in prosecutions following decriminalization among minors (from mean of 1.92 to 5.75/month, $p<0.05$ ), but not adults (26.71 to 36.25, $p>0.05$ ).           |    |
|      |             |                                                                          |                                                                           |                                                 | <i>Criminal justice involvement</i> : defendants representing themselves                                                                                                   | Significant increase following decriminalization (from 18.07 to 30.75/month, $p<0.05$ ).                                                                                          |    |
|      |             |                                                                          |                                                                           |                                                 | <i>Criminal justice involvement</i> : case dismissal before trial                                                                                                          | Significant decrease following decriminalization (from 9.14 to 2.37/month, $p<0.001$ ).                                                                                           |    |
| 102. | Ullman 2017 | United States<br>Legal regulation of cannabis for medical use (MCL)      | Controlled before-and-after study, 1992-2012<br>[State-years without MCL] | Population-based; Household survey<br>N=757,677 | <i>Workplace absence</i> : self-reported absence for medical reasons in the past week                                                                                      | MCL associated with lower probability of absence ( $b= -0.0013$ , $SE=0.0007$ , $p<0.10$ ), with effects concentrated in loosely regulated MCL states, men and people aged 30-49. | 16 |
| 103. | Urfer 2014  | United States<br>Legal regulation of cannabis for recreational use (RCL) | Repeated cross-sectional study, 2011-2014                                 | Convenience sampling<br>N=12,082                | <i>Driving under the influence or with detectable concentration, decriminalized/regulated drug(s)</i> : Proportion of THC-positive blood samples collected from CO drivers | Increase in THC-positive screens from 2011 (28%) to 2012 (59%) to 2013 (65%), $p=0.001$ . No significant change in first two months of legal cannabis sales.                      | 11 |

|      |             |                                                                                            |                                           |                                                           |                                                                                                                                                                |                                                                                                                                                                                                              |     |
|------|-------------|--------------------------------------------------------------------------------------------|-------------------------------------------|-----------------------------------------------------------|----------------------------------------------------------------------------------------------------------------------------------------------------------------|--------------------------------------------------------------------------------------------------------------------------------------------------------------------------------------------------------------|-----|
| 104. | Wagner 2016 | United States<br>Legal regulation of cannabis for recreational use (RCL)                   | Repeated cross-sectional study, 2012-2015 | Convenience sampling<br>N=34                              | <i>Physical health consequences of use, decriminalized/regulated drug(s):</i> Reversible Cerebral Vasoconstriction Syndrome (RCVS) cases secondary to cannabis | Of 18 RCVS cases before RCL, 1 patient used cannabis. Of 16 cases after RCL, 5 used cannabis. No statistical tests reported.                                                                                 | A * |
| 105. | Wall 2016   | United States<br>Legal regulation of cannabis for medical use (MCL)                        | Repeated cross-sectional study, 2002-2010 | Population-based;<br>Household survey                     | <i>Prevalence of use, decriminalized/regulated drug(s):</i> past-month use among adolescents                                                                   | *Reanalysis of Stolzenberg 2016 (#99)<br><br>After appropriate adjustment for pre-MCL prevalence, MCL not associated with adolescent use ( $b = 0.33\%$ ; $SE = 0.29\%$ , $p = 0.25$ ).                      | 18  |
| 106. | Wall 2011   | United States<br>Legal regulation of cannabis for medical use (MCL)                        | Repeated cross-sectional study, 2002-2008 | Population-based;<br>Household survey<br><br>N=23,300     | <i>Prevalence of use, decriminalized/regulated drug(s):</i> past-month use among adolescents                                                                   | Use was significantly higher in MCL states (average of 8.7% vs. 6.9%) but among states that passed MCL from 2004-2008, baseline use (pre-MCL) was already higher than in non-MCL states.                     | 13  |
|      |             |                                                                                            |                                           |                                                           | <i>Perceived harmfulness of decriminalized/regulated drug(s):</i> perceived “great risk” of using monthly or more                                              | Perceived harmfulness was significantly lower in MCL states each year (average of 8.7% vs. 6.9%), but among states that passed MCL, baseline perceived risk (pre-MCL) was already lower than non-MCL states. |     |
| 107. | Wang 2018   | United States<br>Legal regulation of cannabis for recreational use (RCL)                   | Repeated cross-sectional study, 2005-2015 | Population-based;<br>Admin record data<br><br>N=4202      | <i>Health services utilization:</i> emergency or urgent care visits with a cannabis-related discharge code or THC-positive urine toxicology among adolescents  | Cannabis-related visits increased from 1.8 per 1000 visits in 2009 to 4.9 per 1000 in 2015, following RCL ( $p < 0.0001$ ).                                                                                  | 11  |
| 108. | Wang 2017   | United States<br>Legal regulation of cannabis for medical (MCL) and recreational use (RCL) | Repeated cross-sectional study, 2000-2015 | Population-based;<br>Admin record data<br><br>N=7,432,254 | <i>Health services utilization:</i> hospitalizations with cannabis-related billing codes                                                                       | Hospitalizations increased from 274 per 100,000 in 2000 (prior to MCL) to 593 in 2015 (after RCL). Statistically significant 25% increase in 2014 (RCL implementation with legal sales).                     | 14  |
|      |             |                                                                                            |                                           |                                                           | <i>Health services utilization:</i> emergency department visits with cannabis-related billing codes                                                            | ED visits increased from 313 per 100,000 in 2011 to 478 in 2015, with highest rate in 2014 (554). Statistically significant increase in 2014 ( $p = 0.0005$ ).                                               |     |

|      |           |                                                                                                |                                                                                                       |                                                                                 |                                                                                                                                                                                                                                                                                                                                                                                                                                               |                                                                                                                                                                                                                                                                                                                                                                                                                                                                                                                                                   |    |
|------|-----------|------------------------------------------------------------------------------------------------|-------------------------------------------------------------------------------------------------------|---------------------------------------------------------------------------------|-----------------------------------------------------------------------------------------------------------------------------------------------------------------------------------------------------------------------------------------------------------------------------------------------------------------------------------------------------------------------------------------------------------------------------------------------|---------------------------------------------------------------------------------------------------------------------------------------------------------------------------------------------------------------------------------------------------------------------------------------------------------------------------------------------------------------------------------------------------------------------------------------------------------------------------------------------------------------------------------------------------|----|
|      |           |                                                                                                |                                                                                                       |                                                                                 | <i>Overdose or poisoning, decriminalized/regulated drug: cannabis exposure calls to CO poison control centers</i>                                                                                                                                                                                                                                                                                                                             | Poison control calls increased by 79.9% following RCL implementation in 2014, from 123 to 221 ( $p=0.0001$ ).                                                                                                                                                                                                                                                                                                                                                                                                                                     |    |
| 109. | Wang 2016 | United States<br><br>Legal regulation of cannabis for recreational use (RCL)                   | Repeated cross-sectional study, 2009-2015                                                             | Population-based;<br>Admin record data<br><br>N=62                              | <i>Overdose or poisoning, decriminalized/regulated drug: children's hospital visits related to cannabis exposure</i><br><br><i>Overdose or poisoning, decriminalized/regulated drug: poison control calls related to cannabis exposure among children 0-9</i>                                                                                                                                                                                 | RCL associated with increased cannabis-related visits (1.2 per 100,000 in 2012-2013 to 2.3 per 100,000 in 2014-2015, $p=0.02$ ).<br><br>RCL associated with increased cannabis-related calls in CO (2.7 per 100,000 in 2012-2013 to 5.3 per 100,000 in 2014-2015, $p<0.001$ ) and in comparison to rest of the US (34% increase in CO vs. 19% increase in remainder of US, $p=0.04$ ).                                                                                                                                                            | 13 |
| 110. | Wen 2018  | United States<br><br>Legal regulation of cannabis for medical (MCL) and recreational use (RCL) | Controlled before-and-after study, 2011-2016<br><br>[States without MCL or RCL over the study period] | Population-based;<br>Admin record data<br><br>N=1059 state-quarter observations | <i>Prescription drug use: number of opioid prescriptions covered by Medicaid on a quarterly, per-1000-Medicaid-enrollee basis in each state</i>                                                                                                                                                                                                                                                                                               | MCL and RCL associated with reductions in prescriptions of 5.88% (95% CI: -11.55%, -0.21%) and 6.38% (95% CI: -12.20, -0.56%) respectively.                                                                                                                                                                                                                                                                                                                                                                                                       | 17 |
| 111. | Wen 2015  | United States<br><br>Legal regulation of cannabis for medical use (MCL)                        | Repeated cross-sectional study, 2004-2012                                                             | Population-based;<br>Household survey<br><br>N=593,400                          | <i>Prevalence of use, decriminalized/regulated drug(s): past-month use; past-year initiation</i><br><br><i>Frequency of use, decriminalized/regulated drug(s): daily/almost daily use (&gt;20 days in month); # of days among past-month users</i><br><br><i>Prevalence of use, other drugs or alcohol: # of drinks in past month; # of binge drinking days; met DSM-IV alcohol use disorder criteria in past year; both cannabis use and</i> | MCL associated with increase in past-month use among adults 21+ (+1.32%, $p<0.05$ ) but not ages 12-20. MCL associated with increased risk of past-year initiation among ages 12-20 only (+0.32%, $p<0.05$ ).<br><br>MCL associated with increase in (almost) daily use among adults 21+ (+0.58%, $p<0.05$ ) but not ages 12-20.<br><br>MCL associated with frequency of binge drinking (+0.16 days, $p<0.05$ ) and past-month use of both cannabis and alcohol (+1.44%, $p<0.01$ ) among adults 21+. No associations with alcohol use among ages | 17 |

|      |               |                                                                         |                                                                               |                                                     |                                                                                                                                                                                                                                                                                                                     |                                                                                                                                                                                                                                                                                                                                                                                                                                               |    |
|------|---------------|-------------------------------------------------------------------------|-------------------------------------------------------------------------------|-----------------------------------------------------|---------------------------------------------------------------------------------------------------------------------------------------------------------------------------------------------------------------------------------------------------------------------------------------------------------------------|-----------------------------------------------------------------------------------------------------------------------------------------------------------------------------------------------------------------------------------------------------------------------------------------------------------------------------------------------------------------------------------------------------------------------------------------------|----|
|      |               |                                                                         |                                                                               |                                                     | binge drinking in past month; use of cannabis and alcohol on same occasion in past month                                                                                                                                                                                                                            | 12-20, or with alcohol use disorders.                                                                                                                                                                                                                                                                                                                                                                                                         |    |
|      |               |                                                                         |                                                                               |                                                     | <i>Prevalence of use, other drugs or alcohol</i> ; past-year use of non-medical prescription painkillers, heroin, cocaine                                                                                                                                                                                           | No immediate or lagged associations between MCL and illicit drug use in either age group.                                                                                                                                                                                                                                                                                                                                                     |    |
|      |               |                                                                         |                                                                               |                                                     | <i>Substance use disorder or diagnosed dependence</i> : met DSM-IV cannabis use disorder criteria in past year                                                                                                                                                                                                      | Lagged associations between MCL and cannabis use disorder among adults 21+ (+0.25% at 1 year, $p < 0.05$ ) but not among ages 12-20.                                                                                                                                                                                                                                                                                                          |    |
| 112. | Wen 2019      | United States<br><br>Legal regulation of cannabis for medical use (MCL) | Controlled before-and-after study, 2004-2012<br><br>[Non-MCL states]          | Population-based; Household survey<br><br>N=388,200 | <i>Perceived availability of decriminalized/regulated drug(s)</i> : (very) easy to obtain, among adolescents and young adults<br><br><i>Attitudes towards use, decriminalized/regulated drug(s)</i> : acceptance of use by other adolescents/young adults; perceived parental acceptance (ages 12-17 only)          | No significant association between MCL and perceived availability among ages 12-17 or 18-25.<br><br>MCL significantly associated with lower perceived parental acceptance among ages 12-17 (-0.37%, 95% CI: -0.72, -0.03).                                                                                                                                                                                                                    | 16 |
|      |               |                                                                         |                                                                               |                                                     | <i>Perceived harmfulness of decriminalized/regulated drug(s)</i> : no/low health risk of using once or twice per week                                                                                                                                                                                               | MCL significantly associated with higher perceived harmlessness among ages 18-25 only (+4.72%, 95% CI: 0.15, 9.28).                                                                                                                                                                                                                                                                                                                           |    |
| 113. | Williams 2017 | United States<br><br>Legal regulation of cannabis for medical use (MCL) | Controlled before-and-after study, 2004-2013<br><br>[State-years without MCL] | Population-based; Household survey                  | <i>Prevalence of use, decriminalized/regulated drug(s)</i> : past-month use<br><br><i>Frequency of use, decriminalized/legalized drug(s)</i> : heavy use in past year (>300 days), among past-year users<br><br><i>Substance use disorder or diagnosed dependence</i> met DSM-IV criteria for cannabis use disorder | Only loosely regulated MCL associated with higher use, among adults 26+ only (adjusted prevalence difference = +1.46%, 95% CI: 0.33, 2.58).<br><br>Tightly regulated MCL associated with less heavy use, among ages 12-17 only (adjusted prevalence difference = -3.67%, 95% CI: -7.24, -0.11).<br><br>Loosely regulated MCL associated with lower prevalence of cannabis use disorder, among ages 18-25 only (-0.80%, 95% CI: -1.45, -0.16). | 15 |

|      |                  |                                                |                                                                                                                               |                                                              |                                                                                      |                                                                                                                                                                                                                                                                            |    |
|------|------------------|------------------------------------------------|-------------------------------------------------------------------------------------------------------------------------------|--------------------------------------------------------------|--------------------------------------------------------------------------------------|----------------------------------------------------------------------------------------------------------------------------------------------------------------------------------------------------------------------------------------------------------------------------|----|
| 114. | Williams<br>2014 | Australia<br><br>Cannabis<br>decriminalization | Controlled<br>before-and-after<br>study,<br>1998;2001;2004<br>;2007;2010<br><br>[state-years<br>without<br>decriminalization) | Population-<br>based;<br>Household<br>survey<br><br>N=39,087 | <i>Age of first use,<br/>decriminalized/regulated<br/>drug(s): age at initiation</i> | Decriminalization not associated with hazard of cannabis uptake overall but interacts with age such that minors under decriminalization have a 12% higher hazard rate of uptake while adults under decriminalization have an 11% lower hazard rate of uptake ( $p<0.01$ ). | 18 |
|------|------------------|------------------------------------------------|-------------------------------------------------------------------------------------------------------------------------------|--------------------------------------------------------------|--------------------------------------------------------------------------------------|----------------------------------------------------------------------------------------------------------------------------------------------------------------------------------------------------------------------------------------------------------------------------|----|

\*A = abstract; no quality appraisal performed.
