# Supplementary material for: Impact evaluations of drug decriminalisation and legal regulation on drug use, health and social harms: a systematic review
Source: PubMed Central journal article supplement — BMJ Open. 2020 Sep 21;10(9):e035148. doi: 10.1136/bmjopen-2019-035148 (PMC7507857; doi:10.1136/bmjopen-2019-035148), 2020-09-21
Supplement: bmjopen-2019-035148supp003.pdf [file bmjopen-2019-035148supp003.pdf]

Supplementary Table 2. Direction of effect of decriminalization or legal regulation, by outcome category

| Outcomes                                                                                           | # of outcomes | # reporting beneficial effects | # reporting harmful effects | # reporting mixed effects | # reporting no effect | Article # (See Included Studies)                                | Average quality (of 18, excluding abstracts) |
|----------------------------------------------------------------------------------------------------|---------------|--------------------------------|-----------------------------|---------------------------|-----------------------|-----------------------------------------------------------------|----------------------------------------------|
| Accidents, motor vehicle                                                                           | 4             | 1                              | 1                           | 1                         | 1                     | 3, 8, 43, 91                                                    | 14.3                                         |
| Accidents, other                                                                                   | 4             | 0                              | 2                           | 1                         | 1                     | 5, 11, 14, 97                                                   | 12.7                                         |
| Addiction treatment utilization                                                                    | 4             | 0                              | 1                           | 1                         | 2                     | 1, 25, 78, 83                                                   | 14.5                                         |
| Age of first use, decriminalized/regulated drug                                                    | 3             | 0                              | 0                           | 1                         | 2                     | 23, 84, 114                                                     | 12.7                                         |
| Attitudes towards use, decriminalized/regulated drug                                               | 6             | 0                              | 1                           | 3                         | 2                     | 27, 71, 89, 92, 112                                             | 14.0                                         |
| Availability of decriminalized/regulated drug                                                      | 3             | 0                              | 0                           | 1                         | 2                     | 6, 31, 86                                                       | 13.3                                         |
| BMI                                                                                                | 1             | 1                              | 0                           | 0                         | 0                     | 90                                                              | 16.0                                         |
| Costs, health care                                                                                 | 3             | 2                              | 1                           | 0                         | 0                     | 15, 17, 33                                                      | 15.7                                         |
| Costs, other                                                                                       | 3             | 3                              | 0                           | 0                         | 0                     | 33                                                              | 13.0                                         |
| Crime (non-drug)                                                                                   | 9             | 5                              | 0                           | 0                         | 4                     | 7, 44, 74, 95                                                   | 14.0                                         |
| Criminal justice involvement                                                                       | 8             | 1                              | 3                           | 1                         | 3                     | 7, 25, 36, 101                                                  | 13.8                                         |
| Disclosure of use to healthcare provider                                                           | 1             | 1                              | 0                           | 0                         | 0                     | 87                                                              | N/A                                          |
| Educational outcomes                                                                               | 3             | 0                              | 2                           | 1                         | 0                     | 81                                                              | 16.0                                         |
| Frequency of use, decriminalized/regulated drug                                                    | 16            | 1                              | 3                           | 4                         | 8                     | 6, 18, 30, 36, 46, 47, 59, 60, 64, 69, 72, 78, 81, 89, 111, 113 | 14.4                                         |
| Health services utilization (excluding addictions treatment)                                       | 12            | 2                              | 6                           | 1                         | 3                     | 13, 19, 34, 54, 55, 73, 96, 107, 108                            | 13.8                                         |
| Driving under the influence or with detectable concentrations of the decriminalized/regulated drug | 8             | 0                              | 5                           | 1                         | 2                     | 26, 42, 67, 82, 85, 98, 103                                     | 12.0                                         |

| <b>Outcomes</b>                                                                            | <b>Number of outcomes</b> | <b># reporting beneficial effects</b> | <b># reporting harmful effects</b> | <b># reporting mixed effects</b> | <b># reporting no effect</b> | <b>Article # (See Included Studies)</b>                                                                                                                                              | <b>Average quality score</b> |
|--------------------------------------------------------------------------------------------|---------------------------|---------------------------------------|------------------------------------|----------------------------------|------------------------------|--------------------------------------------------------------------------------------------------------------------------------------------------------------------------------------|------------------------------|
| <b>Driving under the influence or with detectable concentrations, other drug/alcohol</b>   | 3                         | 0                                     | 0                                  | 1                                | 2                            | 42, 58, 98                                                                                                                                                                           | 14.5                         |
| <b>Mental health conditions, suicide, or self-harm</b>                                     | 4                         | 0                                     | 1                                  | 2                                | 1                            | 4, 29, 30, 37                                                                                                                                                                        | 15.0                         |
| <b>Mode of use, decriminalized/regulated drug</b>                                          | 1                         | 0                                     | 0                                  | 0                                | 1                            | 39                                                                                                                                                                                   | 13.0                         |
| <b>Opioid therapy compliance</b>                                                           | 1                         | 0                                     | 0                                  | 0                                | 1                            | 63                                                                                                                                                                                   | N/A                          |
| <b>Overdose or poisoning (incl. unintentional exposures) decriminalized/regulated drug</b> | 7                         | 0                                     | 7                                  | 0                                | 0                            | 10, 12, 75, 76, 108, 109                                                                                                                                                             | 13.3                         |
| <b>Overdose or poisoning, other drugs</b>                                                  | 7                         | 4                                     | 0                                  | 2                                | 1                            | 9, 10, 62, 80, 83, 88, 96                                                                                                                                                            | 15.6                         |
| <b>Perceived availability, decriminalized/regulated drug</b>                               | 9                         | 0                                     | 2                                  | 2                                | 5                            | 27, 39, 53, 60, 65, 68, 71, 92, 112                                                                                                                                                  | 14.1                         |
| <b>Perceived harmfulness, decriminalized/regulated drug</b>                                | 12                        | 1                                     | 2                                  | 6                                | 3                            | 18, 22, 30, 38, 39, 52, 59, 60, 71, 92, 106, 112                                                                                                                                     | 13.9                         |
| <b>Physical health consequences of use, decriminalized/regulated drug</b>                  | 1                         | 0                                     | 0                                  | 0                                | 1                            | 104                                                                                                                                                                                  | N/A                          |
| <b>Potency, decriminalized/regulated drug</b>                                              | 1                         | 0                                     | 0                                  | 0                                | 1                            | 93                                                                                                                                                                                   | 16.0                         |
| <b>Prescription drug use (medical use)</b>                                                 | 9                         | 6                                     | 0                                  | 1                                | 2                            | 15, 16, 17, 56, 61, 83, 94, 110                                                                                                                                                      | 16.3                         |
| <b>Prevalence of use, decriminalized/regulated drug</b>                                    | 50                        | 2                                     | 13                                 | 11                               | 24                           | 1, 2, 6, 18, 20, 21, 22, 24, 27, 28, 34, 35, 36, 38, 39, 40, 41, 46, 48, 49, 50, 51, 52, 53, 63, 64, 65, 66, 68, 69, 70, 71, 72, 78, 79, 81, 84, 87, 89, 99, 100, 105, 106, 111, 113 | 14.6                         |

| <b>Outcomes</b>                                            | <b>Number of outcomes</b> | <b># reporting beneficial effects</b> | <b># reporting harmful effects</b> | <b># reporting mixed effects</b> | <b># reporting no effect</b> | <b>Article # (See Included Studies)</b>                 | <b>Average quality score</b> |
|------------------------------------------------------------|---------------------------|---------------------------------------|------------------------------------|----------------------------------|------------------------------|---------------------------------------------------------|------------------------------|
| <b>Prevalence or frequency of use, other drugs/alcohol</b> | 21                        | 2                                     | 2                                  | 6                                | 11                           | 18, 21, 35, 47, 49, 50, 53, 57, 60, 66, 72, 83, 99, 111 | 15.6                         |
| <b>Price of drugs</b>                                      | 5                         | 0                                     | 1                                  | 1                                | 3                            | 3, 31, 32, 45, 77                                       | 14.0                         |
| <b>Substance use disorder or diagnosed dependence</b>      | 5                         | 0                                     | 1                                  | 2                                | 2                            | 40, 59, 69, 111, 113                                    | 14.6                         |
| <b>Workplace absence</b>                                   | 1                         | 1                                     | 0                                  | 0                                | 0                            | 102                                                     | 16.0                         |
